# Supplementary material for: Machine learning sequence prioritization for cell type-specific enhancer design
Source: eLife. 2022 May 16;11:e69571. doi: 10.7554/eLife.69571 (PMC9110026; doi:10.7554/eLife.69571)
Supplement: Figure 1—source data 1. [file elife-69571-fig1-data1.xlsx]

## Sheet: Table S2
Model ID	Description	Related Figures	Data source	Brain region	positive cell type	negative cell type	Num. peaks total	Num. PV+ specific OCRs, filtered	fraction of positives/negatives	Num. pos in training set	Num. neg in training set	Num. pos in validation set	Num. neg in validation set	Num. pos in test set	Num. neg in test set	kernel type (-t)	-l	-k	-d	-c	-w	-g	Training AUPRC	Training AUPRC	Validation AUROC	Validation AUPRC	Test AUROC	Test AUPRC
snNvsASTRO_A	Neuron vs. Astrocyte (sn)	Fig. S2	snATAC-seq	Cortex	Neurons	Astrocytes	415813	100241	0.475825	49626	24100	6848	3503	11448	4716	4	7	6	1	1	0.6	NA	0.964197	0.980581	0.951906	0.973355	0.952017	0.977609
snINvsEXC_J	Inhibitory vs. Excitatory (sn)	Fig. S2	snATAC-seq	Cortex	Inhibitory neurons	Excitatory neurons	415813	21735	3.74356	3251	12372	570	1782	761	2999	4	6	5	1	0.4	1.7	NA	0.955063	0.883324	0.932263	0.84434	0.928513	0.81757
PfPVvsNEG_B	PV+ vs. PV- (pop)	Fig. 1b	cSNAIL-sorted nuclei	Cortex	PV+	PV- cells	160450	17405	0.361361	9180	3594	1385	325	2220	701	4	7	6	1	0.5	0.6	NA	0.942995	0.975435	0.878979	0.964166	0.87873	0.956287
PfPVvsNEG_rbf_J	PV+ vs. PV- (pop, rbf)	Fig. 1c	cSNAIL-sorted nuclei	Cortex	PV+	PV- cells	160450	17405	0.361361	9180	3594	1385	325	2220	701	5	7	6	1	0.6	0.5	2	0.972481	0.988655	0.87735	0.964563	0.872583	0.954492
MoPVvsEXC_A	PV+ vs. EXC (pop)	Fig. 1b	INTACT-sorted nuclei	Cortex	PV+	Excitatory neurons	186016	79943	1.07488	27879	30728	3835	3939	6815	6747	4	7	6	1	0.7	1	NA	0.945588	0.938599	0.936819	0.93505	0.925061	0.923014
MoPVvsEXC_rbf_D	PV+ vs. EXC (pop, rbf)	Fig. 1c	INTACT-sorted nuclei	Cortex	PV+	Excitatory neurons	186016	79943	1.07488	27879	30728	3835	3939	6815	6747	5	7	6	1	0.6	1	1	0.958526	0.952986	0.938142	0.936505	0.926215	0.924361
MoPVvsVIP_E	PV+ vs. VIP+ (pop)	Fig. 1b	INTACT-sorted nuclei	Cortex	PV+	VIP+ neurons	186016	60900	1.95531	15474	28683	1803	4592	3330	7018	4	7	6	1	0.3	1.5	NA	0.925413	0.861252	0.903898	0.796121	0.890854	0.791006
MoPVvsVIP_rbf_G	PV+ vs. VIP+ (pop, rbf)	Fig. 1c	INTACT-sorted nuclei	Cortex	PV+	VIP+ neurons	186016	60900	1.95531	15474	28683	1803	4592	3330	7018	5	7	6	1	0.2	1.5	1	0.927611	0.86514	0.903724	0.791767	0.889827	0.788463
snPVvsRandom_A	PV+ vs. PV- (sn)	Fig. 1e	snATAC-seq	Cortex	PV+	PV- cells, randomly selected	415813	166578	3.66109	25954	95694	3826	13567	5958	21579	4	7	6	1	0.6	1.5	NA	0.918328	0.789134	0.900639	0.750086	0.892782	0.728619
snPVvsKNN_A	PV+ vs. KNN (sn)	Fig. 1e	snATAC-seq	Cortex	PV+	PV- cells, k-nearest neighbor selection	415813	163063	3.70872	25153	94024	3760	12858	5717	21551	4	7	6	1	0.5	2	NA	0.921388	0.787498	0.899768	0.75582	0.893982	0.723517
snPVvsEXC_A	PV+ vs. EXC (sn)	Fig. 1e	snATAC-seq	Cortex	PV+	Excitatory neurons	415813	62405	1.57287	17499	27510	2681	3995	4075	6645	4	7	6	1	0.5	1.3	NA	0.954626	0.934465	0.932148	0.907719	0.930298	0.89691
snPVvsVIP_A	PV+ vs. VIP+ (sn)	Fig. 1e	snATAC-seq	Cortex	PV+	VIP+ neurons	415813	56608	1.05362	20212	21000	2838	3189	4515	4854	4	7	6	1	0.6	1	NA	0.954375	0.952316	0.929878	0.919787	0.929221	0.9222
snPVvsSST_A	PV+ vs. SST+ (sn)	Fig. 1e	snATAC-seq	Cortex	PV+	SST+ neurons	415813	36548	1.04762	13040	13736	1897	1960	2912	3003	4	7	6	1	0.5	1.5	NA	0.959766	0.95485	0.929354	0.924599	0.922118	0.918764
STRPVvsNEG_D	Striatum PV+ vs. PV- (pop)	Fig. 4c; Fig. S7	cSNAIL-sorted nuclei	Striatum	PV+	PV- cells	268265	8260	0.0506233	5481	317	1030	23	1351	58	4	7	6	1	0.6	0.05	NA	0.961628	0.997327	0.838539	0.995333	0.870249	0.993032
GPEPVvsNEG_B	GPe PV+ vs. PV- (pop)	Fig. 4f; Fig. S7	cSNAIL-sorted nuclei	GPe	PV+	PV- cells	268265	15165	1.2197	4966	6294	736	686	1130	1353	4	7	6	1	0.5	1.2	NA	0.95406	0.943161	0.918493	0.9236	0.896367	0.877329
HuPVvsKNN_corces_B	Human PV+ vs. KNN (sn)	Fig. 6a	snATAC-seq	Cortex	PV+	PV- cells, k-nearest neighbor selection	475199	30648	1.63163	8355	13304	1216	2110	2075	3588	4	7	6	1	0.6	1.5	NA	0.871836	0.804896	0.78548	0.690376	0.787553	0.679422
HuPVvsEXC_Corces_A	Human PV+ vs. EXC (sn)	Fig. 6a	snATAC-seq	Cortex	PV+	Excitatory neurons	475199	42063	1.65683	11411	18605	1559	2778	2862	4848	4	7	6	1	0.6	1.5	NA	0.889589	0.81475	0.820641	0.713856	0.833313	0.728574
HuPVvsVIP_Corces_A	Human PV+ vs. VIP+ (sn)	Fig. 6a	snATAC-seq	Cortex	PV+	VIP+ neurons	475199	22920	0.830232	8970	7338	1418	1083	2135	1976	4	7	6	1	0.5	0.86	NA	0.881574	0.884891	0.799892	0.835626	0.815458	0.812543
HuPVvsSST_Corces_B	Human PV+ vs. SST+ (sn)	Fig. 6a	snATAC-seq	Cortex	PV+	SST+ neurons	475199	12821	0.761126	5268	3948	726	572	1286	1021	4	7	6	1	0.4	0.7	NA	0.848359	0.859033	0.755495	0.77014	0.734329	0.753672
