# Supplementary material for: Machine learning sequence prioritization for cell type-specific enhancer design
Source: eLife. 2022 May 16;11:e69571. doi: 10.7554/eLife.69571 (PMC9110026; doi:10.7554/eLife.69571)
Supplement: Figure 1—source data 3. [file elife-69571-fig1-data3.xlsx]

## Sheet: Figure 1-Source Data 3
ID	Target	experimentalSpecificity	chr	start	end	PVvsPVneg_LFC	PVvsKNN_LFC	PVvsEXC_LFC	PVvsVIP_LFC	PVvsSST_LFC	Mean_LFC	PVvsEXC_pop_score	PVvsEXC_pop_rbf_score	PVvsVIP_pop_score	PVvsVIP_pop_rbf_score	PVvsNEG_pop_score	PVvsNEG_pop_rbf_score	PVvsEXC_sn_score	PVvsKNN_sn_score	PVvsPVneg_sn_score	PVvsSST_sn_score	PVvsVIP_sn_score	Avg_score	spec_group
E4	PV	14	chr2	66387764	66388024	-1.25171	0.369609	-0.245529	-0.911173	0.266118	-0.354536	-1.60704	-1.346	-1.27205	-1.19672	-1.17983	-0.990109	-1.20449	-3.10134	-2.47413	-0.215206	-2.09494	-1.51653	low
E1	PV	22	chr2	66256056	66257335	-1.02946	-1.02161	-0.828736	-0.709295	-0.804911	-0.878803	1.6449	1.50432	-1.41079	-0.796891	1.21891	1.03109	0.3712	-0.505236	-0.604277	0.769261	0.0481869	0.297334	low
E10	PV	23	chr2	66450594	66451140	0.686443	6.12986	1.38215	0.310495	0.278978	1.75759	0.693307	0.355512	2.46548	1.73015	0.267924	-0.0743491	0.515141	-0.0746338	0.0387036	1.97843	3.50884	1.03677	low
E7	PV	33	chr2	66407834	66410263	-0.171454	-0.232848	-0.466764	-0.297063	-0.353246	-0.304275	0.417653	0.185993	1.73146	1.47823	-0.135225	-0.203324	-0.497335	-1.06216	-1.38999	0.186731	1.25894	0.179179	low
E9	PV	47	chr2	66441748	66442268	1.74494	1.66256	1.30268	1.00126	1.16151	1.37459	-0.25063	-0.0654164	2.12063	1.53478	0.775864	0.258755	-0.70729	-0.26965	-0.42702	1.27203	2.72044	0.632954	low
E34	PV	48	chr6	147263395	147263584	0.469707	1.34996	0.63055	-0.343886	1.04943	0.631151	1.30685	1.01316	0.660689	0.585846	0.414838	0.163307	0.180481	-0.506554	-0.596446	1.57705	0.5585	0.487066	low
E17	PV	54	chr7	79079999	79080472	-1.97505	-1.55171	0.80896	-0.346029	-0.6845	-0.749666	-0.898065	-0.815881	0.289448	0.384627	-0.404996	-0.470032	-1.24351	-1.53748	-1.65509	0.282832	0.0913213	-0.543348	low
E18	PV	57	chr5	127243448	127244121	2.35117	0.479751	1.54306	0.634608	-0.984057	0.804906	0.770161	0.539844	1.38177	1.12102	1.65304	1.28929	-0.3024	0.0206261	-0.0221335	-1.21268	0.626016	0.533141	low
E19	PV	57	chr5	127257256	127257594	2.7277	-2.01341	-0.999938	-1.78818	-2.1164	-0.838047	1.24889	1.1475	-0.160321	-0.0421098	1.68032	1.13253	0.586914	-0.292407	-0.531048	0.590455	0.91426	0.570453	low
E3	PV	57	chr2	66383190	66384021	-0.364653	0.406776	-0.417429	-0.588256	0.218456	-0.149021	1.22852	0.754981	0.777423	0.336369	-0.108339	-0.138173	0.0705781	-0.89217	-0.652298	0.31362	0.23523	0.175067	low
E16	PV	58	chr7	79056553	79057054	1.84462	1.95228	3.21044	3.69771	3.36243	2.8135	0.844626	0.609843	0.278466	0.218282	0.536499	0.205037	0.0729118	-0.347369	-0.577025	0.437788	0.90126	0.28912	low
E12	PV	59	chr15	78204583	78204784	4.09651	8.02156	3.04251	8.0997	1.37398	4.92685	0.829688	0.847226	-0.147542	-0.0231537	0.820504	0.841353	-1.47389	-1.46267	-1.97566	0.280856	0.122562	-0.121884	low
E8	PV	61	chr2	66439814	66441457	0.58793	0.493363	0.31189	0.222775	-0.0115911	0.320873	0.359306	0.165524	-0.07925	-0.133959	0.324801	0.353749	-0.767267	-1.73589	-1.77719	-1.03677	0.412288	-0.355878	low
E31	PV	63	chr13	83507235	83507457	-2.11552	2.75538	-3.03952	-1.78818	-2.1164	-1.26085	-0.630616	-0.373232	0.930899	0.582157	-0.0926896	-0.277758	-2.35444	-2.80881	-2.87039	-0.908582	0.272238	-0.775566	low
E23	PV	64	chr5	127323924	127324468	1.4764	1.75383	2.89315	1.30036	-0.300637	1.42462	2.26751	1.70446	-1.48963	-1.25864	1.02847	0.776067	0.987639	0.350447	-0.0184188	0.435672	-0.893206	0.35367	low
E20	PV	66	chr5	127290515	127291016	-0.902486	-0.700719	0.628129	1.42534	1.07728	0.305509	-0.0245905	-0.185105	-0.110573	-0.0266971	0.924464	0.582332	-1.13654	-1.14136	-1.62596	0.783657	-0.382372	-0.212977	low
E27	PV	66	chr4	143361408	143362362	7.98913	8.02156	4.32815	0.634267	4.09561	5.01374	0.54461	0.443753	0.105001	-0.0020441	1.38601	1.17109	-0.450532	-0.896098	-1.46617	0.550657	0.551416	0.176154	low
E13	PV	67	chr15	78205234	78205766	0.245761	-0.0301324	1.80359	1.48155	1.1311	0.926373	2.25198	1.75133	-1.17006	-0.91155	2.749	2.18858	2.078	1.58678	0.958548	0.933256	0.187969	1.1458	low
E32	PV	70	chr13	83515122	83515409	4.86393	1.07461	-1.34147	-1.18445	0.970421	0.876609	1.37856	1.18457	-0.489545	-0.436682	1.61834	1.19445	0.519037	-0.0338566	-0.006743	2.12052	0.862435	0.71919	high
E21	PV	71	chr5	127300767	127301107	1.0962	0.00189105	4.48727	2.94882	2.61402	2.22964	0.520875	0.551838	1.58998	1.13112	1.79568	1.32595	0.622458	-0.617308	-1.00565	0.905489	0.496027	0.665133	high
E26	PV	72	chr4	143348892	143349749	1.53117	1.44878	4.3349	1.10837	2.7428	2.2332	0.975515	0.908248	-0.591595	-0.167286	0.650895	0.638683	-0.65146	-1.43324	-1.72239	0.964543	0.602098	0.0158192	high
E25	PV	73	chr5	127355818	127356133	-1.26353	-1.73252	1.53408	0.992246	4.55408	0.816872	3.22876	2.21462	0.845155	0.57704	1.30334	0.871183	2.02793	1.03211	0.533041	2.73571	1.53419	1.53664	high
E30	PV	77	chr13	83503268	83504033	-1.53035	-0.846707	-1.96918	-0.925459	0.970421	-0.860255	0.849549	0.544816	-0.645427	-0.390591	0.482737	0.0547385	1.01835	-0.641941	-0.724393	2.03662	-0.0770744	0.227944	high
E15	PV	79	chr7	79053118	79053435	2.2882	1.55418	2.92053	2.26317	1.29244	2.06371	2.66468	2.07407	0.552928	0.240784	2.68818	1.81538	0.591942	1.75411	1.06043	0.413742	1.46074	1.39245	high
E24	PV	82	chr5	127331966	127332522	2.86474	1.99827	6.62348	0.451956	-0.412168	2.30526	1.39107	1.04688	1.43205	1.36593	1.28249	0.828233	1.00731	0.717955	0.420104	-0.312919	2.18717	1.0333	high
E33	PV	82	chr13	83518268	83519179	-1.22379	-1.18446	-1.36204	-0.671795	-0.517788	-0.991975	1.09251	0.680581	-0.876148	-0.712066	-0.204927	-0.204309	-0.270859	-1.04103	-1.26101	0.21605	-0.505833	-0.28064	high
E28	PV	83	chr11	3504821	3505244	0.0301073	-0.0250953	-0.346497	-0.300122	-0.283377	-0.184997	1.73363	1.30265	0.618414	0.500311	1.30709	1.04921	-1.02681	-1.43293	-2.29463	0.535898	0.907424	0.290932	high
E35	PV	86	chr6	147266874	147267390	7.54374	2.80733	3.19815	1.08848	3.65022	3.65758	1.10217	0.852495	0.892506	0.800862	0.630849	0.571748	0.215866	0.0792086	-0.21047	1.77917	0.800249	0.68315	high
E11	PV	90	chr15	78204152	78204655	3.35123	3.61117	3.58562	2.70808	1.67934	2.98709	4.90524	3.68222	-1.79514	-1.21056	3.0765	2.1856	2.03647	1.51345	1.04018	1.93195	-0.266595	1.55448	high
E2	PV	90	chr2	66364036	66364653	1.13605	1.5911	2.06337	0.491525	1.93693	1.4438	0.683862	0.490829	0.741731	0.220401	0.122876	-0.272638	0.825529	0.836503	1.00703	-0.770949	-0.0138803	0.351936	high
E14	PV	94	chr7	79052127	79052622	4.33172	1.93875	2.99472	3.15918	2.08874	2.90262	0.611477	0.570345	0.0759797	0.187069	-0.194369	-0.110625	-1.38211	-2.6066	-2.85754	2.50912	0.757656	-0.221782	high
E22	PV	94	chr5	127305150	127305592	7.25595	2.5195	4.93361	0.800568	2.41181	3.58429	0.813834	0.629846	0.565661	0.382915	1.25061	0.687666	0.848466	1.45786	1.37863	1.31077	2.0344	1.03279	high
E29	PV	94	chr11	3509025	3509652	4.04087	4.40906	3.67892	2.66763	2.63565	3.48643	2.84126	2.38515	1.83081	1.34651	2.13612	1.7811	2.74497	3.1203	2.73314	3.36513	3.37778	2.51475	high
