# Supplementary material for: Machine learning sequence prioritization for cell type-specific enhancer design
Source: eLife. 2022 May 16;11:e69571. doi: 10.7554/eLife.69571 (PMC9110026; doi:10.7554/eLife.69571)
Supplement: Figure 1—source data 4. [file elife-69571-fig1-data4.xlsx]

## Sheet: fimo_pwmAllModels_Scn1aEnhAll
motif_id	motif_alt_id	sequence_name	start	stop	strand	score	p-value	q-value	matched_sequence
PfPVvsNEG5.fwd		E1	282	294	+	13.4404	5.54e-06	0.0607	AAGCAGGAGGCTG
snPVvsKNN6.fwd		E1	101	113	-	13.197	8.02e-06	0.17	GCACTCAGCATAT
PfPVvsNEG10.fwd		E1	462	474	+	13.3421	1.02e-05	0.105	AGCCCCTGGGAGT
snPVvsEXC5.fwd		E1	101	113	+	12.9016	1.27e-05	0.155	ATATGCTGAGTGC
MoPVvsVIP12.fwd		E1	1148	1160	+	13.4156	1.41e-05	0.265	TATTTAAAAATAT
PfPVvsNEG8.fwd		E1	101	113	+	12.9	1.63e-05	0.228	ATATGCTGAGTGC
PfPVvsNEGrbf5.fwd		E1	463	475	+	12.2857	1.66e-05	0.123	GCCCCTGGGAGTC
MoPVvsVIPrbf7.fwd		E1	786	798	-	12.8816	1.69e-05	0.0608	TCCCTCCTCCTCG
PfPVvsNEGrbf13.fwd		E1	373	385	-	12.8421	1.7e-05	0.0926	TGAGAGCCTGCGG
MoPVvsEXCrbf5.fwd		E1	101	113	+	13.1364	1.91e-05	0.27	ATATGCTGAGTGC
MoPVvsVIP1.fwd		E1	645	657	+	11.0164	1.94e-05	0.124	TAGGAAGGAGGGG
snPVvsRandom5.fwd		E1	101	113	+	12.121	2.39e-05	0.311	ATATGCTGAGTGC
PfPVvsNEGrbf5.fwd		E1	253	265	-	12.0143	2.73e-05	0.149	TCTCCTGGGAAAG
MoPVvsVIPrbf2.fwd		E1	1150	1162	+	12.2836	2.93e-05	0.209	TTTAAAAATATGT
PfPVvsNEGrbf8.fwd		E1	282	294	-	12.4286	2.93e-05	0.136	CAGCCTCCTGCTT
MoPVvsVIP8.fwd		E1	1180	1192	-	12.5584	3.27e-05	0.233	TTAAGAAATAGAA
snPVvsVIP4.fwd		E1	1150	1162	+	12.1667	3.57e-05	0.255	TTTAAAAATATGT
MoPVvsEXC4.fwd		E1	101	113	-	12.4697	3.94e-05	0.318	GCACTCAGCATAT
PfPVvsNEG3.fwd		E1	386	398	+	12.7879	3.99e-05	0.208	CCATCAGCTGCCC
PfPVvsNEGrbf7.fwd		E1	101	113	+	11.7714	4.08e-05	0.175	ATATGCTGAGTGC
PfPVvsNEG10.fwd		E1	254	266	-	12.2632	4.48e-05	0.134	TTCTCCTGGGAAA
PfPVvsNEG11.fwd		E1	1245	1257	-	11.5132	4.8e-05	0.305	GGGCTGGGGAACA
PfPVvsNEGrbf12.fwd		E1	720	732	+	11.6974	4.83e-05	0.17	TCCGCTGAGCATT
snPVvsSST1.fwd		E1	70	82	+	10.8621	5.09e-05	0.361	CCTTGTCCTTGTT
snPVvsRandom1.fwd		E1	70	82	+	11.4918	5.16e-05	0.276	CCTTGTCCTTGTT
MoPVvsVIP13.fwd		E1	102	114	-	11.6053	5.43e-05	0.422	TGCACTCAGCATA
snPVvsEXC8.fwd		E1	996	1008	+	10.9857	5.5e-05	0.251	GTCTGGGCCACAA
PfPVvsNEGrbf7.fwd		E1	385	397	-	11.4571	5.59e-05	0.207	GGCAGCTGATGGT
snPVvsEXC6.fwd		E1	387	399	+	12.3939	5.79e-05	0.179	CATCAGCTGCCCG
snPVvsRandom6.fwd		E1	387	399	-	12.2121	5.82e-05	0.19	CGGGCAGCTGATG
snPVvsKNN6.fwd		E1	905	917	+	11.8788	5.94e-05	0.232	TTTCTCAGCATTT
MoPVvsEXC6.fwd		E1	1036	1048	+	11.2237	5.95e-05	0.331	AAAAACCTTGAAG
PfPVvsNEGrbf2.fwd		E1	386	398	+	12.2273	6.15e-05	0.154	CCATCAGCTGCCC
snPVvsKNN4.fwd		E1	387	399	-	12.0492	6.24e-05	0.212	CGGGCAGCTGATG
MoPVvsVIPrbf12.fwd		E1	102	114	-	11.0395	6.49e-05	0.346	TGCACTCAGCATA
MoPVvsEXC6.fwd		E1	65	77	+	11.0921	6.52e-05	0.331	CCAAACCTTGTCC
PfPVvsNEGrbf13.fwd		E1	858	870	+	11.1842	6.93e-05	0.147	GGAGAGCCATGCC
snPVvsKNN11.fwd		E1	384	396	+	11.0526	7.25e-05	0.518	CACCATCAGCTGC
snPVvsVIP9.fwd		E1	803	815	+	11.6316	7.49e-05	0.376	GTGGAGCAAGAGA
MoPVvsEXCrbf4.fwd		E1	387	399	-	11.7273	7.58e-05	0.193	CGGGCAGCTGATG
snPVvsKNN5.fwd		E1	571	583	+	10.7449	7.84e-05	0.171	GGCGTGCAGCACG
MoPVvsEXC3.fwd		E1	387	399	-	10.9394	7.93e-05	0.207	CGGGCAGCTGATG
MoPVvsVIP8.fwd		E1	1150	1162	+	11.1818	8.23e-05	0.385	TTTAAAAATATGT
PfPVvsNEGrbf2.fwd		E1	387	399	-	11.7273	8.65e-05	0.154	CGGGCAGCTGATG
snPVvsRandom8.fwd		E1	833	845	+	11.1143	8.89e-05	0.76	AAGATGATGAAGC
snPVvsEXC6.fwd		E1	386	398	-	11.6515	8.99e-05	0.179	GGGCAGCTGATGG
MoPVvsEXCrbf4.fwd		E1	386	398	+	11.3485	9.16e-05	0.202	CCATCAGCTGCCC
snPVvsSST6.fwd		E1	1	13	-	10.4571	9.35e-05	0.559	CTCTGTCCACTTT
snPVvsRandom3.fwd		E1	571	583	+	10.2135	9.75e-05	0.176	GGCGTGCAGCACG
snPVvsEXC1.fwd		E1	70	82	+	10.7245	9.9e-05	0.38	CCTTGTCCTTGTT
PfPVvsNEG13.fwd		E10	322	334	-	15.5921	5.21e-07	0.0219	CTTCAAGGACATG
PfPVvsNEGrbf11.fwd		E10	322	334	+	15.1579	1.15e-06	0.0479	CATGTCCTTGAAG
MoPVvsVIPrbf5.fwd		E10	6	18	+	13.4085	7.53e-06	0.101	AAAAGGAAGGAAT
MoPVvsVIP2.fwd		E10	324	336	+	11.5323	7.56e-06	0.105	TGTCCTTGAAGTG
snPVvsSST3.fwd		E10	335	347	+	11.4627	1.06e-05	0.454	TGTCTAATTATGT
snPVvsRandom1.fwd		E10	321	333	+	12.377	1.4e-05	0.199	CCATGTCCTTGAA
snPVvsEXC6.fwd		E10	71	83	+	13.697	1.73e-05	0.121	GGACAGCTGCCAA
snPVvsRandom7.fwd		E10	335	347	+	11.7463	1.91e-05	0.473	TGTCTAATTATGT
snPVvsKNN4.fwd		E10	70	82	+	13.2623	2.27e-05	0.148	AGGACAGCTGCCA
snPVvsRandom8.fwd		E10	113	125	-	12.2286	2.56e-05	0.274	AACCTGATGAATT
MoPVvsEXCrbf4.fwd		E10	71	83	-	13.2273	2.57e-05	0.157	TTGGCAGCTGTCC
MoPVvsVIPrbf1.fwd		E10	277	289	+	10.6393	2.6e-05	0.243	GCTTCAAGAAAAT
MoPVvsVIP10.fwd		E10	476	488	-	12.0263	2.76e-05	0.192	TCTGAGAAGGAGT
snPVvsVIP10.fwd		E10	71	83	+	12.5526	2.81e-05	0.248	GGACAGCTGCCAA
MoPVvsVIP1.fwd		E10	409	421	+	10.918	2.86e-05	0.133	ATGGAAGGAGGCA
snPVvsKNN1.fwd		E10	321	333	+	11.8361	3.02e-05	0.275	CCATGTCCTTGAA
MoPVvsEXC3.fwd		E10	71	83	-	12.2576	3.02e-05	0.179	TTGGCAGCTGTCC
MoPVvsVIP2.fwd		E10	276	288	-	10.8065	3.09e-05	0.322	TTTTCTTGAAGCA
snPVvsRandom1.fwd		E10	66	78	-	11.7213	3.8e-05	0.276	AGCTGTCCTTGTG
snPVvsKNN10.fwd		E10	113	125	+	12.2895	3.95e-05	0.797	AATTCATCAGGTT
snPVvsKNN7.fwd		E10	335	347	+	11.1045	4.31e-05	0.859	TGTCTAATTATGT
PfPVvsNEGrbf2.fwd		E10	71	83	-	12.6212	4.48e-05	0.154	TTGGCAGCTGTCC
MoPVvsVIPrbf1.fwd		E10	323	335	-	10.3279	5.11e-05	0.281	ACTTCAAGGACAT
PfPVvsNEG13.fwd		E10	65	77	+	11.8026	5.52e-05	0.359	TCACAAGGACAGC
MoPVvsVIP4.fwd		E10	478	490	+	11.6286	5.67e-05	0.253	TCCTTCTCAGATA
snPVvsKNN1.fwd		E10	66	78	-	11.3607	5.83e-05	0.284	AGCTGTCCTTGTG
snPVvsSST1.fwd		E10	66	78	-	10.7931	5.84e-05	0.361	AGCTGTCCTTGTG
snPVvsSST1.fwd		E10	321	333	+	10.7759	6.02e-05	0.361	CCATGTCCTTGAA
PfPVvsNEG4.fwd		E10	400	412	-	11.2222	6.1e-05	0.873	CCATAATTTCTTG
snPVvsRandom6.fwd		E10	70	82	+	12.1515	6.11e-05	0.19	AGGACAGCTGCCA
snPVvsEXC1.fwd		E10	321	333	+	11.0612	6.4e-05	0.373	CCATGTCCTTGAA
PfPVvsNEG3.fwd		E10	71	83	-	12.1212	6.75e-05	0.229	TTGGCAGCTGTCC
MoPVvsVIP11.fwd		E10	161	173	+	11.3421	7.61e-05	0.437	TGGCATCTTCAAT
snPVvsEXC9.fwd		E10	113	125	+	11.5921	7.71e-05	0.827	AATTCATCAGGTT
PfPVvsNEGrbf11.fwd		E10	65	77	-	11.2632	7.88e-05	0.289	GCTGTCCTTGTGA
snPVvsVIP1.fwd		E10	323	335	+	9.33333	8.32e-05	0.382	ATGTCCTTGAAGT
snPVvsEXC4.fwd		E10	520	532	+	11.0806	8.69e-05	1	TGTGTAATCATGG
snPVvsSST4.fwd		E10	265	277	-	10.4242	9.65e-05	0.443	CAATGACATTGCT
PfPVvsNEGrbf10.fwd		E10	400	412	-	10.75	9.71e-05	1	CCATAATTTCTTG
snPVvsRandom6.fwd		E10	71	83	-	11.3636	9.91e-05	0.19	TTGGCAGCTGTCC
snPVvsKNN5.fwd		E11	72	84	-	13.4592	7.09e-08	0.00295	ACACTGCAGCGCT
snPVvsEXC7.fwd		E11	72	84	-	12.9242	7.08e-07	0.0292	ACACTGCAGCGCT
snPVvsRandom3.fwd		E11	72	84	-	12.191	9.94e-07	0.0375	ACACTGCAGCGCT
PfPVvsNEGrbf12.fwd		E11	134	146	-	14.2763	1.32e-06	0.0556	TGCGCTGAGCCGG
PfPVvsNEGrbf13.fwd		E11	109	121	-	14.8553	1.63e-06	0.0641	GCGGAGCCAGGCC
PfPVvsNEGrbf13.fwd		E11	131	143	-	14.4342	3.02e-06	0.0641	GCTGAGCCGGGCG
PfPVvsNEG5.fwd		E11	213	225	+	13.7064	3.42e-06	0.0607	ATTCAGGAGGCTC
MoPVvsEXCrbf8.fwd		E11	73	85	+	13.9342	3.72e-06	0.052	GCGCTGCAGTGTC
PfPVvsNEG10.fwd		E11	402	414	+	13.6184	6.28e-06	0.086	GGCCCCTGGGCTA
PfPVvsNEGrbf12.fwd		E11	146	158	-	13.4474	6.58e-06	0.124	GCTGCTGAGCTGT
PfPVvsNEGrbf7.fwd		E11	147	159	-	13.0857	7.99e-06	0.0665	AGCTGCTGAGCTG
PfPVvsNEG8.fwd		E11	147	159	-	13.3571	8.66e-06	0.182	AGCTGCTGAGCTG
PfPVvsNEG13.fwd		E11	299	311	+	13.8026	1.2e-05	0.252	TGTCAAGGGCATA
MoPVvsVIPrbf7.fwd		E11	42	54	+	12.9211	1.62e-05	0.0608	GTTCTCCTCATCC
snPVvsEXC7.fwd		E11	73	85	+	11.8788	1.71e-05	0.0783	GCGCTGCAGTGTC
MoPVvsEXCrbf8.fwd		E11	72	84	-	13.0526	1.74e-05	0.122	ACACTGCAGCGCT
snPVvsRandom3.fwd		E11	73	85	+	11.2472	1.8e-05	0.107	GCGCTGCAGTGTC
MoPVvsVIPrbf10.fwd		E11	148	160	+	13.3421	2.15e-05	0.302	AGCTCAGCAGCTC
PfPVvsNEG6.fwd		E11	73	85	-	11.7429	2.79e-05	0.136	GACACTGCAGCGC
PfPVvsNEGrbf8.fwd		E11	213	225	-	12.3143	3.25e-05	0.136	GAGCCTCCTGAAT
snPVvsKNN1.fwd		E11	300	312	-	11.7869	3.25e-05	0.275	GTATGCCCTTGAC
MoPVvsVIP5.fwd		E11	300	312	-	12.3857	3.38e-05	0.389	GTATGCCCTTGAC
PfPVvsNEGrbf4.fwd		E11	73	85	+	11.803	3.46e-05	0.16	GCGCTGCAGTGTC
snPVvsRandom1.fwd		E11	300	312	-	11.6885	3.97e-05	0.276	GTATGCCCTTGAC
PfPVvsNEGrbf11.fwd		E11	299	311	-	12.1579	4.43e-05	0.289	TATGCCCTTGACA
MoPVvsVIP4.fwd		E11	147	159	-	11.8857	4.48e-05	0.253	AGCTGCTGAGCTG
snPVvsKNN6.fwd		E11	147	159	+	12.0455	5.07e-05	0.232	CAGCTCAGCAGCT
snPVvsEXC1.fwd		E11	300	312	-	11.2041	5.19e-05	0.373	GTATGCCCTTGAC
snPVvsRandom5.fwd		E11	147	159	-	11.4839	5.26e-05	0.349	AGCTGCTGAGCTG
MoPVvsEXCrbf1.fwd		E11	300	312	-	10.5204	5.36e-05	0.33	GTATGCCCTTGAC
PfPVvsNEG10.fwd		E11	224	236	-	12.0658	5.45e-05	0.134	GGGTCCTGGGCGA
snPVvsKNN5.fwd		E11	73	85	+	11.0204	5.61e-05	0.161	GCGCTGCAGTGTC
PfPVvsNEGrbf3.fwd		E11	300	312	-	11.6515	5.78e-05	0.349	GTATGCCCTTGAC
MoPVvsVIPrbf7.fwd		E11	250	262	+	11.5263	6.15e-05	0.0923	CATCTCCTGATCT
MoPVvsEXC4.fwd		E11	147	159	+	12.0152	6.16e-05	0.318	CAGCTCAGCAGCT
snPVvsVIP2.fwd		E11	300	312	-	11.4545	6.32e-05	0.518	GTATGCCCTTGAC
MoPVvsEXCrbf5.fwd		E11	147	159	-	11.6818	7.72e-05	0.336	AGCTGCTGAGCTG
snPVvsRandom13.fwd		E11	187	199	+	10.8947	7.8e-05	0.66	GGGCCACATGCCC
PfPVvsNEGrbf12.fwd		E11	177	189	+	10.9474	8.45e-05	0.237	CAAGCTGAGCGGG
PfPVvsNEGrbf7.fwd		E11	153	165	+	10.9714	8.64e-05	0.219	AGCAGCTCAGTCC
snPVvsEXC5.fwd		E11	147	159	-	11.4918	8.92e-05	0.318	AGCTGCTGAGCTG
PfPVvsNEG1.fwd		E11	300	312	-	11	9.56e-05	0.504	GTATGCCCTTGAC
PfPVvsNEG10.fwd		E12	89	101	-	12.8684	2.1e-05	0.127	CCTCCCTGGGTCC
PfPVvsNEGrbf13.fwd		E12	78	90	+	11.9605	3.77e-05	0.134	CCTGAGCCACAGG
MoPVvsVIPrbf7.fwd		E12	119	131	+	11.2763	7.45e-05	0.104	GAGCTCCTCTGTG
snPVvsKNN4.fwd		E13	335	347	-	14.3115	1.56e-06	0.0327	AGGACAGCTGGGG
PfPVvsNEG9.fwd		E13	232	244	-	14.6857	4.15e-06	0.116	ACGCTGACTCACC
PfPVvsNEGrbf6.fwd		E13	232	244	+	14.2286	4.86e-06	0.104	GGTGAGTCAGCGT
MoPVvsEXC3.fwd		E13	213	225	+	13.9242	5.56e-06	0.0833	GCTCCAGCTGCCC
snPVvsRandom6.fwd		E13	214	226	-	13.9091	5.63e-06	0.096	GGGGCAGCTGGAG
snPVvsKNN4.fwd		E13	214	226	-	13.9016	6.34e-06	0.0666	GGGGCAGCTGGAG
snPVvsRandom6.fwd		E13	335	347	-	13.8182	6.83e-06	0.096	AGGACAGCTGGGG
snPVvsEXC6.fwd		E13	213	225	-	14.2727	7.37e-06	0.0955	GGGCAGCTGGAGC
PfPVvsNEG3.fwd		E13	213	225	+	14.0455	9.24e-06	0.101	GCTCCAGCTGCCC
snPVvsEXC6.fwd		E13	334	346	-	14.1061	9.82e-06	0.0955	GGACAGCTGGGGG
MoPVvsEXCrbf4.fwd		E13	213	225	+	13.9545	1.13e-05	0.117	GCTCCAGCTGCCC
snPVvsRandom6.fwd		E13	107	119	-	13.5303	1.15e-05	0.121	TGGGCAGCTGGGA
snPVvsRandom12.fwd		E13	231	243	+	14.0263	1.35e-05	0.396	TGGTGAGTCAGCG
PfPVvsNEG3.fwd		E13	334	346	+	13.6515	1.58e-05	0.129	CCCCCAGCTGTCC
PfPVvsNEG3.fwd		E13	352	364	+	13.5152	1.86e-05	0.129	CCTTCAGCTGCTT
snPVvsKNN12.fwd		E13	231	243	-	13.2763	1.89e-05	0.334	CGCTGACTCACCA
PfPVvsNEGrbf2.fwd		E13	107	119	-	13.4091	2.07e-05	0.154	TGGGCAGCTGGGA
MoPVvsEXCrbf4.fwd		E13	334	346	+	13.3939	2.17e-05	0.157	CCCCCAGCTGTCC
snPVvsVIP3.fwd		E13	232	244	+	12.1515	2.33e-05	0.463	GGTGAGTCAGCGT
PfPVvsNEGrbf2.fwd		E13	214	226	-	13.2424	2.49e-05	0.154	GGGGCAGCTGGAG
PfPVvsNEG11.fwd		E13	417	429	-	12.0263	2.64e-05	0.282	CAGCTGGGAACAA
MoPVvsEXCrbf4.fwd		E13	352	364	+	13.197	2.66e-05	0.157	CCTTCAGCTGCTT
MoPVvsEXC3.fwd		E13	352	364	+	12.3788	2.75e-05	0.179	CCTTCAGCTGCTT
snPVvsKNN4.fwd		E13	353	365	-	13.082	2.85e-05	0.148	AAAGCAGCTGAAG
snPVvsKNN4.fwd		E13	107	119	-	13	3.13e-05	0.148	TGGGCAGCTGGGA
snPVvsEXC6.fwd		E13	352	364	-	13.1061	3.24e-05	0.151	AAGCAGCTGAAGG
PfPVvsNEGrbf2.fwd		E13	213	225	+	12.9242	3.41e-05	0.154	GCTCCAGCTGCCC
MoPVvsEXC3.fwd		E13	334	346	+	12.0758	3.52e-05	0.179	CCCCCAGCTGTCC
snPVvsRandom12.fwd		E13	231	243	-	12.3421	4.15e-05	0.441	CGCTGACTCACCA
snPVvsEXC8.fwd		E13	245	257	+	11.2286	4.37e-05	0.251	CTTTGGGCCACAG
PfPVvsNEGrbf2.fwd		E13	334	346	+	12.5606	4.72e-05	0.154	CCCCCAGCTGTCC
PfPVvsNEGrbf2.fwd		E13	352	364	+	12.5606	4.72e-05	0.154	CCTTCAGCTGCTT
snPVvsEXC6.fwd		E13	106	118	-	12.6515	4.82e-05	0.169	GGGCAGCTGGGAA
snPVvsRandom6.fwd		E13	353	365	-	12.3485	5.18e-05	0.19	AAAGCAGCTGAAG
snPVvsVIP10.fwd		E13	507	519	-	11.3026	5.34e-05	0.248	AAACAGATGCTGT
PfPVvsNEGrbf2.fwd		E13	421	433	-	12.3636	5.53e-05	0.154	AGTCCAGCTGGGA
PfPVvsNEG11.fwd		E13	84	96	+	11.3421	5.79e-05	0.305	ATACTGGGGACCA
MoPVvsVIP3.fwd		E13	294	306	-	11.303	5.94e-05	0.878	TATGAAGTCAGGG
snPVvsVIP10.fwd		E13	353	365	+	10.9605	6.3e-05	0.248	CTTCAGCTGCTTT
MoPVvsEXCrbf4.fwd		E13	107	119	-	11.9242	6.8e-05	0.193	TGGGCAGCTGGGA
snPVvsEXC6.fwd		E13	421	433	+	12.1364	6.94e-05	0.179	TCCCAGCTGGACT
MoPVvsEXC3.fwd		E13	214	226	-	11.1212	7e-05	0.205	GGGGCAGCTGGAG
PfPVvsNEG3.fwd		E13	214	226	-	12.0303	7.18e-05	0.229	GGGGCAGCTGGAG
PfPVvsNEG11.fwd		E13	67	79	+	11.1184	7.25e-05	0.305	CGTCTGGGGTGAT
MoPVvsEXC3.fwd		E13	107	119	-	11.0606	7.29e-05	0.205	TGGGCAGCTGGGA
snPVvsVIP10.fwd		E13	352	364	-	10.6184	7.39e-05	0.256	AAGCAGCTGAAGG
MoPVvsEXCrbf4.fwd		E13	106	118	+	11.7727	7.4e-05	0.193	TTCCCAGCTGCCC
MoPVvsEXCrbf4.fwd		E13	421	433	-	11.697	7.72e-05	0.193	AGTCCAGCTGGGA
snPVvsEXC6.fwd		E13	107	119	+	11.9091	7.82e-05	0.179	TCCCAGCTGCCCA
snPVvsVIP10.fwd		E13	107	119	+	10.4605	7.92e-05	0.256	TCCCAGCTGCCCA
MoPVvsEXCrbf4.fwd		E13	214	226	-	11.6364	7.97e-05	0.193	GGGGCAGCTGGAG
MoPVvsVIPrbf12.fwd		E13	233	245	+	10.6974	8.02e-05	0.38	GTGAGTCAGCGTC
PfPVvsNEGrbf2.fwd		E13	353	365	-	11.8333	8.09e-05	0.154	AAAGCAGCTGAAG
PfPVvsNEG3.fwd		E13	421	433	-	11.8182	8.19e-05	0.229	AGTCCAGCTGGGA
PfPVvsNEGrbf13.fwd		E13	166	178	+	10.9211	8.39e-05	0.166	GCTGAGCCCTGGA
PfPVvsNEG3.fwd		E13	106	118	+	11.7273	8.63e-05	0.229	TTCCCAGCTGCCC
MoPVvsEXC3.fwd		E13	421	433	-	10.8182	8.65e-05	0.207	AGTCCAGCTGGGA
snPVvsSST4.fwd		E13	294	306	+	10.4848	8.81e-05	0.443	CCCTGACTTCATA
snPVvsEXC6.fwd		E13	259	271	-	11.6818	8.86e-05	0.179	AGCCAGCTGGCAA
PfPVvsNEGrbf8.fwd		E13	184	196	+	10.9429	9.08e-05	0.211	GCCCTTCCTGGAA
PfPVvsNEG11.fwd		E13	495	507	-	10.8553	9.29e-05	0.325	TAACTGGGGCCAC
PfPVvsNEGrbf2.fwd		E13	260	272	-	11.5909	9.36e-05	0.154	AAGCCAGCTGGCA
PfPVvsNEG3.fwd		E13	107	119	-	11.5303	9.58e-05	0.229	TGGGCAGCTGGGA
snPVvsKNN12.fwd		E13	231	243	+	10.6447	9.73e-05	0.807	TGGTGAGTCAGCG
MoPVvsVIPrbf6.fwd		E14	189	201	+	14.9714	8.92e-07	0.019	GGGTGACCTTGAC
MoPVvsVIP5.fwd		E14	189	201	+	15.3714	1.01e-06	0.0216	GGGTGACCTTGAC
snPVvsKNN1.fwd		E14	189	201	+	13.3934	1.31e-06	0.0278	GGGTGACCTTGAC
snPVvsKNN5.fwd		E14	154	166	+	12.8061	1.36e-06	0.0282	ACACTGCAGCTTG
PfPVvsNEG1.fwd		E14	189	201	+	13.9545	1.36e-06	0.0396	GGGTGACCTTGAC
snPVvsVIP2.fwd		E14	189	201	+	13.5758	1.57e-06	0.0333	GGGTGACCTTGAC
PfPVvsNEGrbf3.fwd		E14	189	201	+	14.0152	1.79e-06	0.038	GGGTGACCTTGAC
snPVvsRandom3.fwd		E14	154	166	+	12.0562	1.8e-06	0.0375	ACACTGCAGCTTG
snPVvsRandom1.fwd		E14	189	201	+	13.3279	1.82e-06	0.0388	GGGTGACCTTGAC
snPVvsEXC1.fwd		E14	189	201	+	12.7857	1.82e-06	0.0385	GGGTGACCTTGAC
snPVvsEXC7.fwd		E14	154	166	+	12.5758	2.69e-06	0.0519	ACACTGCAGCTTG
snPVvsVIP5.fwd		E14	155	167	-	13.3857	5.08e-06	0.0527	GCAAGCTGCAGTG
MoPVvsEXCrbf1.fwd		E14	189	201	+	11.3469	7.54e-06	0.159	GGGTGACCTTGAC
snPVvsSST1.fwd		E14	189	201	+	11.6379	9.67e-06	0.203	GGGTGACCTTGAC
PfPVvsNEGrbf4.fwd		E14	153	165	-	12.5909	1.1e-05	0.125	AAGCTGCAGTGTG
PfPVvsNEG6.fwd		E14	153	165	+	12.3571	1.11e-05	0.117	CACACTGCAGCTT
MoPVvsEXC1.fwd		E14	189	201	+	10.9431	1.86e-05	0.305	GGGTGACCTTGAC
MoPVvsEXC6.fwd		E14	190	202	+	13.0658	2.04e-05	0.177	GGTGACCTTGACT
snPVvsSST5.fwd		E14	420	432	+	11.9286	2.15e-05	0.168	TAGAGGCCAGGCC
PfPVvsNEGrbf11.fwd		E14	452	464	+	12.5132	3.4e-05	0.289	GATGTCCTTGGTC
PfPVvsNEG13.fwd		E14	452	464	-	12.4079	3.59e-05	0.303	GACCAAGGACATC
MoPVvsEXCrbf8.fwd		E14	153	165	-	12.4342	3.72e-05	0.164	AAGCTGCAGTGTG
snPVvsSST5.fwd		E14	116	128	+	11.3143	4.97e-05	0.247	TCAAGGCCAGCAG
MoPVvsVIPrbf3.fwd		E14	237	249	-	11.2	5.35e-05	0.569	GGGCTCAGAAAGT
MoPVvsEXCrbf8.fwd		E14	154	166	+	11.8158	6.73e-05	0.164	ACACTGCAGCTTG
snPVvsRandom1.fwd		E14	451	463	+	11.2459	6.9e-05	0.276	AGATGTCCTTGGT
MoPVvsVIP4.fwd		E14	237	249	+	11.1143	8.41e-05	0.26	ACTTTCTGAGCCC
snPVvsKNN1.fwd		E14	451	463	+	10.9508	9.04e-05	0.359	AGATGTCCTTGGT
MoPVvsVIPrbf5.fwd		E14	105	117	-	10.8592	9.35e-05	0.143	GAGAGGAAGCGGG
PfPVvsNEG13.fwd		E14	190	202	-	10.9474	9.39e-05	0.359	AGTCAAGGTCACC
snPVvsRandom3.fwd		E14	61	73	-	10.236	9.49e-05	0.176	GCAGTGCAGTGGA
MoPVvsEXC6.fwd		E15	163	175	-	14	7.24e-06	0.158	AGGGACCTTGAGC
MoPVvsVIP4.fwd		E15	140	152	-	11.4143	6.77e-05	0.253	GCGTCCTCAGCTC
snPVvsKNN13.fwd		E15	206	218	-	10.3421	9.86e-05	0.319	ACCTGCGTCAGAT
snPVvsVIP10.fwd		E16	280	292	-	17.1447	4.24e-07	0.0181	ACACAGCTGCATA
MoPVvsEXCrbf4.fwd		E16	280	292	+	15.4848	4.72e-07	0.0194	TATGCAGCtgtgt
snPVvsEXC6.fwd		E16	280	292	-	15.2121	6.28e-07	0.0215	ACACAGCTGCATA
MoPVvsEXC3.fwd		E16	280	292	+	14.8182	1.36e-06	0.0575	TATGCAGCtgtgt
PfPVvsNEGrbf2.fwd		E16	280	292	+	14.9394	1.49e-06	0.0614	TATGCAGCtgtgt
PfPVvsNEG3.fwd		E16	280	292	+	14.7121	2.84e-06	0.0629	TATGCAGCtgtgt
snPVvsKNN4.fwd		E16	281	293	-	13.9836	5.13e-06	0.0666	CACACAGCTGCAT
snPVvsEXC8.fwd		E16	18	30	-	12.1286	1.5e-05	0.251	TCCTGGGACACAG
snPVvsRandom6.fwd		E16	280	292	+	13.3333	1.6e-05	0.135	TATGCAGCtgtgt
MoPVvsVIPrbf5.fwd		E16	75	87	-	12.6761	1.95e-05	0.101	TCCAGGAAGGAGG
PfPVvsNEG10.fwd		E16	21	33	-	12.6711	2.72e-05	0.127	TATTCCTGGGACA
PfPVvsNEGrbf5.fwd		E16	20	32	-	11.9857	2.85e-05	0.149	ATTCCTGGGACAC
PfPVvsNEGrbf8.fwd		E16	76	88	+	12.0857	3.97e-05	0.136	CTCCTTCCTGGAG
snPVvsRandom14.fwd		E16	18	30	-	11.9737	4.68e-05	0.269	TCCTGGGACACAG
snPVvsRandom6.fwd		E16	281	293	-	12.3788	5.05e-05	0.19	CACACAGCTGCAT
MoPVvsVIP1.fwd		E16	73	85	-	10.7377	5.14e-05	0.15	CAGGAAGGAGGGC
PfPVvsNEGrbf13.fwd		E16	266	278	+	11.3289	6.21e-05	0.147	TCAGAGCCTCCTT
snPVvsKNN13.fwd		E16	18	30	-	10.9868	6.89e-05	0.289	TCCTGGGACACAG
PfPVvsNEG5.fwd		E16	76	88	-	10.945	7e-05	0.171	CTCCAGGAAGGAG
snPVvsVIP8.fwd		E16	412	424	-	11.8553	7.16e-05	0.788	TACACTGTAAGGC
MoPVvsVIP6.fwd		E16	412	424	-	11.4286	8.45e-05	0.709	TACACTGTAAGGC
MoPVvsVIPrbf8.fwd		E16	412	424	-	11.2632	9.55e-05	0.683	TACACTGTAAGGC
PfPVvsNEGrbf13.fwd		E17	309	321	+	13.5658	8.11e-06	0.0861	ACAGAGCCAGCCC
snPVvsSST4.fwd		E17	59	71	-	11.6061	9.88e-06	0.204	TACTGACTTTGCC
snPVvsVIP9.fwd		E17	234	246	-	12.8553	2.85e-05	0.239	AGGCAGCAAGACT
snPVvsSST7.fwd		E17	180	192	+	12.0139	3.95e-05	0.406	CATATTTATTGCG
MoPVvsVIPrbf12.fwd		E17	61	73	+	11.6711	4.33e-05	0.346	CAAAGTCAGTATC
snPVvsVIP3.fwd		E17	60	72	+	11.697	4.36e-05	0.463	GCAAAGTCAGTAT
snPVvsVIP1.fwd		E17	210	222	-	9.6383	4.95e-05	0.35	TTCTTCTTAAAAA
MoPVvsVIPrbf5.fwd		E17	375	387	+	11.1549	7.6e-05	0.141	CGAGGGAAGAAAC
PfPVvsNEGrbf13.fwd		E17	291	303	+	10.8289	8.97e-05	0.166	TCTAAGCCAGGGA
MoPVvsVIP1.fwd		E17	8	20	-	10.4754	9.5e-05	0.22	TGGGAAGGAAAGC
MoPVvsVIP8.fwd		E17	135	147	-	10.8701	9.88e-05	0.385	AAGAAAAATAGGG
snPVvsRandom8.fwd		E18	64	76	+	12.9286	6.94e-06	0.148	TGGCTGATGAAAG
snPVvsEXC9.fwd		E18	64	76	-	12.9342	1.83e-05	0.392	CTTTCATCAGCCA
snPVvsKNN11.fwd		E18	63	75	-	13.0263	2.1e-05	0.4	TTTCATCAGCCAT
snPVvsSST6.fwd		E18	580	592	+	11.7286	2.36e-05	0.449	ATCTGTCCAGTCA
PfPVvsNEGrbf13.fwd		E18	429	441	+	12.1579	3.2e-05	0.125	cctgagccacctc
MoPVvsVIPrbf7.fwd		E18	443	455	+	11.9737	4.22e-05	0.0755	cggctccTCCACA
PfPVvsNEGrbf12.fwd		E18	426	438	+	11.8289	4.32e-05	0.166	acccctgagccac
MoPVvsVIP7.fwd		E18	247	259	+	11.2237	4.66e-05	0.469	ttctgagacagag
snPVvsKNN10.fwd		E18	64	76	-	11.8947	6.17e-05	0.797	CTTTCATCAGCCA
MoPVvsVIP4.fwd		E18	322	334	+	11.4429	6.61e-05	0.253	gcctcctaagcgc
MoPVvsVIPrbf9.fwd		E18	502	514	-	11.3684	7.54e-05	0.643	TTTTAAGACAGTG
PfPVvsNEG5.fwd		E18	393	405	-	10.6881	8.69e-05	0.18	ATGCAGGAGGACC
MoPVvsVIPrbf9.fwd		E18	247	259	+	11.1974	9.17e-05	0.652	ttctgagacagag
snPVvsEXC11.fwd		E18	261	273	+	10.2632	9.7e-05	0.686	ttctcatctggcg
PfPVvsNEG4.fwd		E19	261	273	+	13.1944	2.56e-06	0.11	ttctaatttcctt
PfPVvsNEGrbf5.fwd		E19	136	148	+	13	2.81e-06	0.118	TGGCCTGGGGCCC
PfPVvsNEGrbf10.fwd		E19	261	273	+	12.8472	6.1e-06	0.262	ttctaatttcctt
snPVvsRandom11.fwd		E19	13	25	-	13.4605	1.7e-05	0.537	AATGCAATTAGTA
snPVvsKNN7.fwd		E19	260	272	+	11.4925	1.77e-05	0.76	attctaatttcct
PfPVvsNEG11.fwd		E19	137	149	+	12.2237	2.07e-05	0.282	GGCCTGGGGCCCA
snPVvsSST5.fwd		E19	132	144	-	11.8571	2.43e-05	0.168	CCCAGGCCAGTGT
snPVvsKNN4.fwd		E19	176	188	-	12.9836	3.18e-05	0.148	GAAACAGCTGACA
MoPVvsVIP1.fwd		E19	314	326	+	10.8525	3.61e-05	0.137	agggaaggaaaga
snPVvsKNN11.fwd		E19	271	283	-	12.2368	3.78e-05	0.4	CAGCATCAGAAAG
MoPVvsEXCrbf4.fwd		E19	175	187	+	12.6818	4.11e-05	0.178	GTGTCAGCTGTTT
snPVvsEXC2.fwd		E19	12	24	+	10.619	4.26e-05	0.915	ATACTAATTGCAT
snPVvsEXC6.fwd		E19	175	187	-	12.697	4.67e-05	0.169	AAACAGCTGACAC
MoPVvsVIPrbf5.fwd		E19	233	245	+	11.5775	5.54e-05	0.121	TGAAGGAAGGCTT
MoPVvsEXCrbf2.fwd		E19	12	24	+	10.6349	5.77e-05	1	ATACTAATTGCAT
PfPVvsNEG10.fwd		E19	135	147	+	11.9211	6.31e-05	0.134	CTGGCCTGGGGCC
snPVvsRandom7.fwd		E19	260	272	+	10.9701	6.96e-05	0.746	attctaatttcct
PfPVvsNEGrbf2.fwd		E19	175	187	+	11.9848	7.31e-05	0.154	GTGTCAGCTGTTT
snPVvsRandom6.fwd		E19	176	188	-	11.8182	7.63e-05	0.19	GAAACAGCTGACA
snPVvsSST4.fwd		E19	171	183	-	10.5455	8.05e-05	0.443	AGCTGACACTAGA
PfPVvsNEG10.fwd		E19	143	155	-	11.4737	9.3e-05	0.147	TGTACCTGGGCCC
PfPVvsNEG3.fwd		E19	175	187	+	11.5758	9.37e-05	0.229	GTGTCAGCTGTTT
snPVvsRandom5.fwd		E2	294	306	-	13.25	1.65e-06	0.0697	AAATGCTGACTCT
PfPVvsNEGrbf6.fwd		E2	292	304	+	14.8714	1.99e-06	0.0847	CTAGAGTCAGCAT
snPVvsKNN6.fwd		E2	294	306	+	13.6818	2.16e-06	0.0913	AGAGTCAGCATTT
snPVvsVIP3.fwd		E2	292	304	+	13.2121	2.81e-06	0.12	CTAGAGTCAGCAT
snPVvsEXC5.fwd		E2	294	306	-	13.4098	2.95e-06	0.125	AAATGCTGACTCT
MoPVvsEXCrbf5.fwd		E2	294	306	-	14.0303	3.36e-06	0.143	AAATGCTGACTCT
MoPVvsEXC4.fwd		E2	294	306	+	13.9091	3.7e-06	0.152	AGAGTCAGCATTT
MoPVvsVIP13.fwd		E2	293	305	+	15.1842	3.88e-06	0.166	TAGAGTCAGCATT
MoPVvsVIPrbf12.fwd		E2	293	305	+	15.3158	5.12e-06	0.218	TAGAGTCAGCATT
PfPVvsNEG9.fwd		E2	292	304	-	14.4857	5.51e-06	0.116	ATGCTGACTCTAG
snPVvsVIP8.fwd		E2	161	173	+	12.8816	2.07e-05	0.788	ATTACTGTAAGCC
MoPVvsVIP6.fwd		E2	161	173	+	12.5571	2.16e-05	0.709	ATTACTGTAAGCC
snPVvsVIP13.fwd		E2	48	60	+	12.3976	2.94e-05	0.552	TTCCTAAAAGAAG
MoPVvsVIPrbf8.fwd		E2	161	173	+	12.3158	3.63e-05	0.683	ATTACTGTAAGCC
PfPVvsNEG8.fwd		E2	294	306	-	12.1	4e-05	0.259	AAATGCTGACTCT
PfPVvsNEG4.fwd		E2	249	261	-	11.5139	4.45e-05	0.873	ACATAATTGCCAC
snPVvsRandom14.fwd		E2	501	513	+	11.8158	5.08e-05	0.269	ATATGGGACACAT
PfPVvsNEGrbf10.fwd		E2	249	261	-	11.3194	5.52e-05	1	ACATAATTGCCAC
snPVvsSST4.fwd		E2	291	303	-	10.7576	5.73e-05	0.443	TGCTGACTCTAGC
MoPVvsVIPrbf7.fwd		E2	84	96	+	11.5789	5.9e-05	0.0918	TCCCTCCTCATTT
snPVvsKNN13.fwd		E2	501	513	+	11.1842	6.21e-05	0.289	ATATGGGACACAT
snPVvsVIP1.fwd		E2	456	468	+	9.43262	7.09e-05	0.382	ATTTCCTTAAAAT
snPVvsRandom11.fwd		E2	249	261	+	12.3158	7.4e-05	0.816	GTGGCAATTATGT
snPVvsRandom2.fwd		E2	217	229	-	11.2381	7.43e-05	0.335	AAAAAAATAACCT
MoPVvsVIP8.fwd		E2	218	230	-	11.1169	8.56e-05	0.385	GAAAAAAATAACC
MoPVvsVIPrbf5.fwd		E20	267	279	+	14.4648	1.14e-06	0.0475	AGAAGGAAGTAGG
snPVvsSST5.fwd		E20	190	202	-	12.6286	3.82e-06	0.0807	TCCAGGCCAGGGG
snPVvsVIP9.fwd		E20	389	401	-	13.7763	8.52e-06	0.119	CTGCTGCAAGGAG
MoPVvsVIP1.fwd		E20	265	277	+	11.0492	1.68e-05	0.124	CCAGAAGGAAGTA
MoPVvsVIPrbf1.fwd		E20	387	399	-	10.5738	2.96e-05	0.243	GCTGCAAGGAGCC
snPVvsSST6.fwd		E20	79	91	-	11.3143	3.97e-05	0.449	ATCAGTCCAGGCA
snPVvsVIP5.fwd		E20	391	403	-	11.6571	4.46e-05	0.142	GCCTGCTGCAAGG
PfPVvsNEGrbf11.fwd		E20	386	398	+	12.0921	4.63e-05	0.289	TGGCTCCTTGCAG
PfPVvsNEG5.fwd		E20	354	366	+	11.2844	5.13e-05	0.164	TAGCAGGAGGCGA
snPVvsSST7.fwd		E20	290	302	+	11.5694	5.46e-05	0.406	TCTCTTTATAGCC
snPVvsSST5.fwd		E20	128	140	-	10.9429	7.45e-05	0.247	TCCAGGCCAATCT
snPVvsSST5.fwd		E20	8	20	-	10.7857	8.75e-05	0.247	GTGGGGCCAGGAC
PfPVvsNEGrbf8.fwd		E20	354	366	-	10.9143	9.23e-05	0.211	TCGCCTCCTGCTA
MoPVvsVIP9.fwd		E20	237	249	-	10.7105	9.26e-05	0.79	ATATTCTTAGGCT
PfPVvsNEG10.fwd		E21	258	270	+	15	2.01e-07	0.00828	GTGCCCTGGGATC
MoPVvsVIPrbf1.fwd		E21	213	225	+	11.8525	5.08e-07	0.0202	TCTTCAAGGAGCT
MoPVvsVIP2.fwd		E21	212	224	-	12.2419	7.52e-07	0.0313	GCTCCTTGAAGAA
snPVvsVIP1.fwd		E21	213	225	-	10.7943	2.92e-06	0.124	AGCTCCTTGAAGA
PfPVvsNEGrbf5.fwd		E21	259	271	+	12.5857	8.65e-06	0.121	TGCCCTGGGATCT
MoPVvsVIP1.fwd		E21	115	127	-	11.0492	1.68e-05	0.124	AGGGAAGGAGGGG
PfPVvsNEGrbf8.fwd		E21	244	256	+	12.3857	3.06e-05	0.136	GTGCATCCTGCCA
PfPVvsNEG5.fwd		E21	244	256	-	11.7156	3.44e-05	0.132	TGGCAGGATGCAC
snPVvsSST5.fwd		E21	227	239	+	11.1286	6.11e-05	0.247	CAGTGGCCAGAGC
PfPVvsNEGrbf5.fwd		E21	122	134	+	11.4143	6.34e-05	0.204	TTCCCTGGGGTGT
snPVvsVIP9.fwd		E21	58	70	-	11.8421	6.54e-05	0.376	GTAGAGCAAGAGG
PfPVvsNEG10.fwd		E21	121	133	+	11.8684	6.63e-05	0.134	CTTCCCTGGGGTG
PfPVvsNEG5.fwd		E21	6	18	-	11	6.67e-05	0.171	GCACCGGAGGCAG
MoPVvsVIPrbf13.fwd		E21	170	182	+	11.0263	7.52e-05	0.645	GGAGGAATCAGCT
PfPVvsNEGrbf11.fwd		E21	104	116	-	11.3289	7.53e-05	0.289	GGTATCCTTGGGG
MoPVvsVIPrbf1.fwd		E21	163	175	+	10.0656	7.57e-05	0.311	TCCAGAAGGAGGA
PfPVvsNEG10.fwd		E21	279	291	-	11.6842	7.85e-05	0.134	AGCCCCTGGGCAG
PfPVvsNEGrbf11.fwd		E21	214	226	-	11.2368	7.99e-05	0.289	GAGCTCCTTGAAG
snPVvsVIP1.fwd		E21	103	115	-	9.33333	8.32e-05	0.382	GTATCCTTGGGGG
MoPVvsVIP1.fwd		E21	164	176	+	10.541	8.35e-05	0.212	CCAGAAGGAGGAA
MoPVvsEXCrbf1.fwd		E21	256	268	+	10.2653	8.43e-05	0.395	AAGTGCCCTGGGA
PfPVvsNEG13.fwd		E21	104	116	+	11.1053	8.54e-05	0.359	CCCCAAGGATACC
snPVvsSST4.fwd		E21	82	94	-	10.4848	8.81e-05	0.443	GGCTGACAGCATG
MoPVvsVIP15.fwd		E21	170	182	+	10.3659	8.87e-05	0.951	GGAGGAATCAGCT
PfPVvsNEGrbf5.fwd		E21	278	290	-	11	9.88e-05	0.218	GCCCCTGGGCAGA
snPVvsEXC9.fwd		E22	281	293	+	14.5263	3.15e-07	0.0135	CCGTCATCAGGGA
snPVvsRandom9.fwd		E22	43	55	+	14.0556	2.31e-06	0.0989	GTTCTAAATAAAT
snPVvsKNN10.fwd		E22	281	293	+	13.5658	3.38e-06	0.145	CCGTCATCAGGGA
snPVvsRandom8.fwd		E22	281	293	-	13.0286	5.15e-06	0.148	TCCCTGATGACGG
snPVvsKNN8.fwd		E22	43	55	-	13.3571	6.36e-06	0.273	ATTTATTTAGAAC
PfPVvsNEG13.fwd		E22	217	229	-	12.6974	2.86e-05	0.301	TATCAAGGGCATG
snPVvsRandom9.fwd		E22	193	205	+	12.2778	3.56e-05	0.447	ACGCTAAATTTAT
MoPVvsEXC5.fwd		E22	48	60	-	12.0139	3.99e-05	0.417	GTTCTATTTATTT
snPVvsRandom9.fwd		E22	196	208	-	12.1111	4.17e-05	0.447	TTTATAAATTTAG
PfPVvsNEGrbf11.fwd		E22	217	229	+	12.2368	4.19e-05	0.289	CATGCCCTTGATA
PfPVvsNEG2.fwd		E22	282	294	+	11.2576	4.5e-05	1	CGTCATCAGGGAG
PfPVvsNEGrbf1.fwd		E22	281	293	-	11.371	4.51e-05	1	TCCCTGATGACGG
snPVvsKNN8.fwd		E22	193	205	-	12.2	4.52e-05	0.412	ATAAATTTAGCGT
snPVvsSST7.fwd		E22	42	54	-	11.7361	4.82e-05	0.406	TTTATTTAGAACA
PfPVvsNEG7.fwd		E22	48	60	+	11.875	4.9e-05	0.432	AAATAAATAGAAC
PfPVvsNEGrbf9.fwd		E22	48	60	+	11.8333	5.22e-05	0.409	AAATAAATAGAAC
snPVvsKNN1.fwd		E22	216	228	+	11.4262	5.36e-05	0.284	TCATGCCCTTGAT
MoPVvsEXCrbf1.fwd		E22	216	228	+	10.5102	5.47e-05	0.33	TCATGCCCTTGAT
PfPVvsNEG10.fwd		E22	356	368	-	12.0526	5.51e-05	0.134	TGGACCTGGGATG
snPVvsVIP5.fwd		E22	136	148	+	11.4	5.63e-05	0.149	TACCCCTGCAGTG
MoPVvsEXCrbf6.fwd		E22	48	60	-	11.5224	5.85e-05	0.413	GTTCTATTTATTT
PfPVvsNEGrbf4.fwd		E22	137	149	-	11.303	6.15e-05	0.16	CCACTGCAGGGGT
PfPVvsNEGrbf3.fwd		E22	216	228	+	11.5152	6.58e-05	0.349	TCATGCCCTTGAT
snPVvsSST1.fwd		E22	216	228	+	10.6897	6.92e-05	0.363	TCATGCCCTTGAT
snPVvsSST7.fwd		E22	46	58	-	11.2361	7.06e-05	0.433	TCTATTTATTTAG
snPVvsEXC3.fwd		E22	48	60	+	11.1746	7.33e-05	0.393	AAATAAATAGAAC
snPVvsRandom1.fwd		E22	216	228	+	11.1803	7.45e-05	0.276	TCATGCCCTTGAT
PfPVvsNEGrbf5.fwd		E22	355	367	-	11.2714	7.47e-05	0.218	GGACCTGGGATGT
MoPVvsVIPrbf7.fwd		E22	322	334	+	11.2368	7.66e-05	0.104	CGGCTCCTGCTCT
snPVvsRandom3.fwd		E22	138	150	+	10.3708	7.94e-05	0.165	CCCCTGCAGTGGA
snPVvsRandom2.fwd		E22	48	60	+	11.127	8.12e-05	0.335	AAATAAATAGAAC
snPVvsEXC6.fwd		E22	415	427	+	11.7273	8.64e-05	0.179	TCCCAGCTGGGAC
PfPVvsNEGrbf2.fwd		E22	415	427	-	11.7121	8.72e-05	0.154	GTCCCAGCTGGGA
snPVvsKNN2.fwd		E22	48	60	-	10.8413	9.3e-05	0.398	GTTCTATTTATTT
PfPVvsNEGrbf9.fwd		E22	44	56	+	11.0278	9.56e-05	0.409	TTCTAAATAAATA
snPVvsKNN5.fwd		E22	138	150	+	10.5714	9.58e-05	0.189	CCCCTGCAGTGGA
snPVvsVIP2.fwd		E22	216	228	+	10.9848	9.76e-05	0.518	TCATGCCCTTGAT
snPVvsEXC6.fwd		E22	414	426	-	11.4545	9.82e-05	0.179	TCCCAGCTGGGAT
snPVvsEXC6.fwd		E23	357	369	+	13.4091	2.42e-05	0.146	ACTCAGCTGGATC
PfPVvsNEG11.fwd		E23	11	23	+	12.0395	2.6e-05	0.282	GGTCTGGGGGCAC
PfPVvsNEGrbf12.fwd		E23	448	460	-	12.3421	2.71e-05	0.166	AGAGCTGAGCCAA
MoPVvsVIP4.fwd		E23	27	39	+	12.3571	2.72e-05	0.189	TCTTCCTGAGGGC
PfPVvsNEG9.fwd		E23	507	519	-	12.7571	2.96e-05	0.312	CCCCTGACTGAGG
PfPVvsNEGrbf13.fwd		E23	445	457	-	12.1579	3.2e-05	0.125	GCTGAGCCAAGGG
MoPVvsEXC3.fwd		E23	357	369	-	12.1061	3.43e-05	0.179	GATCCAGCTGAGT
MoPVvsEXCrbf4.fwd		E23	357	369	-	12.803	3.72e-05	0.178	GATCCAGCTGAGT
PfPVvsNEGrbf8.fwd		E23	25	37	+	12.1	3.92e-05	0.136	CCTCTTCCTGAGG
MoPVvsVIPrbf7.fwd		E23	88	100	+	11.9474	4.31e-05	0.0755	TCCCTCCTCCCCC
PfPVvsNEG10.fwd		E23	154	166	+	12.25	4.56e-05	0.134	GCCGCCTGGGCCC
PfPVvsNEGrbf6.fwd		E23	507	519	+	11.8143	5.38e-05	0.459	CCTCAGTCAGGGG
PfPVvsNEGrbf2.fwd		E23	357	369	-	12.3182	5.72e-05	0.154	GATCCAGCTGAGT
PfPVvsNEGrbf5.fwd		E23	245	257	-	11.4857	5.83e-05	0.204	TACCCTGGGAGGA
PfPVvsNEG5.fwd		E23	25	37	-	11.1284	5.89e-05	0.171	CCTCAGGAAGAGG
MoPVvsVIPrbf10.fwd		E23	402	414	-	11.8158	6.37e-05	0.302	ATCTCAGCAACAA
PfPVvsNEG10.fwd		E23	246	258	-	11.8158	6.93e-05	0.134	CTACCCTGGGAGG
snPVvsKNN4.fwd		E23	356	368	+	11.8361	7.09e-05	0.213	AACTCAGCTGGAT
MoPVvsVIPrbf3.fwd		E23	27	39	-	10.8	7.81e-05	0.651	GCCCTCAGGAAGA
PfPVvsNEG3.fwd		E23	357	369	-	11.8788	7.89e-05	0.229	GATCCAGCTGAGT
snPVvsRandom6.fwd		E23	356	368	+	11.7576	7.9e-05	0.19	AACTCAGCTGGAT
PfPVvsNEGrbf2.fwd		E23	356	368	+	11.6818	8.88e-05	0.154	AACTCAGCTGGAT
PfPVvsNEG3.fwd		E23	356	368	+	11.5909	9.28e-05	0.229	AACTCAGCTGGAT
MoPVvsEXCrbf5.fwd		E23	403	415	+	11.2121	9.6e-05	0.37	TGTTGCTGAGATG
snPVvsRandom5.fwd		E23	403	415	+	10.75	9.67e-05	0.349	TGTTGCTGAGATG
MoPVvsVIPrbf10.fwd		E24	337	349	-	15.0658	7.7e-07	0.0325	CCCTCAGCACTTT
MoPVvsEXC3.fwd		E24	138	150	+	13.8788	5.93e-06	0.0833	TCCGCAGCTGTTA
MoPVvsEXCrbf4.fwd		E24	138	150	+	14.3485	6.42e-06	0.0882	TCCGCAGCTGTTA
PfPVvsNEGrbf8.fwd		E24	98	110	+	13.8143	6.65e-06	0.0815	TGGCTTCCTGTTT
PfPVvsNEG5.fwd		E24	98	110	-	13.2569	7.32e-06	0.0607	AAACAGGAAGCCA
MoPVvsEXCrbf2.fwd		E24	243	255	+	11.619	7.9e-06	0.339	GCCCTAATTATTT
PfPVvsNEGrbf8.fwd		E24	153	165	-	13.5286	9.37e-06	0.0815	TCGCTTCCTGCCA
PfPVvsNEG3.fwd		E24	138	150	+	14.0152	9.67e-06	0.101	TCCGCAGCTGTTA
PfPVvsNEGrbf7.fwd		E24	338	350	+	12.8286	1.13e-05	0.0783	AAGTGCTGAGGGA
snPVvsEXC6.fwd		E24	138	150	-	14.0152	1.14e-05	0.0955	TAACAGCTGCGGA
PfPVvsNEGrbf2.fwd		E24	138	150	+	13.8182	1.24e-05	0.154	TCCGCAGCTGTTA
snPVvsVIP10.fwd		E24	138	150	-	13.6579	1.47e-05	0.248	TAACAGCTGCGGA
PfPVvsNEG5.fwd		E24	153	165	+	12.4495	1.76e-05	0.122	TGGCAGGAAGCGA
snPVvsRandom7.fwd		E24	243	255	+	11.6567	2.39e-05	0.473	GCCCTAATTATTT
snPVvsEXC2.fwd		E24	243	255	+	10.9365	2.66e-05	0.915	GCCCTAATTATTT
snPVvsKNN4.fwd		E24	139	151	-	13.0328	3e-05	0.148	TTAACAGCTGCGG
PfPVvsNEGrbf12.fwd		E24	7	19	-	12.0263	3.65e-05	0.166	ACCTCTGAGCCCA
snPVvsSST3.fwd		E24	243	255	+	10.9254	4.21e-05	0.904	GCCCTAATTATTT
snPVvsVIP10.fwd		E24	139	151	+	11.7105	4.38e-05	0.248	CCGCAGCTGTTAA
snPVvsEXC5.fwd		E24	338	350	+	12.082	4.83e-05	0.236	AAGTGCTGAGGGA
snPVvsRandom6.fwd		E24	138	150	+	12.2576	5.61e-05	0.19	TCCGCAGCTGTTA
snPVvsKNN6.fwd		E24	338	350	-	11.8636	6.03e-05	0.232	TCCCTCAGCACTT
snPVvsKNN7.fwd		E24	243	255	+	10.8955	6.55e-05	0.859	GCCCTAATTATTT
MoPVvsVIPrbf13.fwd		E24	182	194	+	11.2895	6.71e-05	0.645	GCTGAAATCATCA
MoPVvsEXCrbf5.fwd		E24	338	350	+	11.8788	6.89e-05	0.336	AAGTGCTGAGGGA
MoPVvsVIPrbf5.fwd		E24	97	109	-	11.1972	7.34e-05	0.141	AACAGGAAGCCAG
MoPVvsVIPrbf5.fwd		E24	154	166	+	11.1268	7.78e-05	0.141	GGCAGGAAGCGAT
snPVvsRandom1.fwd		E24	449	461	+	11.0656	8.5e-05	0.279	ATGTGTCCTAGAT
snPVvsRandom6.fwd		E24	139	151	-	11.5606	8.92e-05	0.19	TTAACAGCTGCGG
PfPVvsNEG8.fwd		E24	338	350	+	11.1571	8.98e-05	0.314	AAGTGCTGAGGGA
snPVvsSST5.fwd		E24	16	28	+	10.7429	9.1e-05	0.247	AGGTGGCCAGGAG
snPVvsKNN10.fwd		E24	186	198	+	11.4605	9.29e-05	0.797	AAATCATCAGTTA
MoPVvsEXC4.fwd		E24	338	350	-	11.4848	9.33e-05	0.327	TCCCTCAGCACTT
snPVvsRandom5.fwd		E24	338	350	+	10.7177	9.89e-05	0.349	AAGTGCTGAGGGA
PfPVvsNEGrbf11.fwd		E25	50	62	-	13.2105	1.87e-05	0.289	AGAGTCCTTGGAA
PfPVvsNEG13.fwd		E25	50	62	+	12.75	2.75e-05	0.301	TTCCAAGGACTCT
MoPVvsVIPrbf8.fwd		E25	12	24	-	12.0395	4.78e-05	0.683	CTCACTGTACTTC
snPVvsVIP8.fwd		E25	12	24	-	12.0789	5.82e-05	0.788	CTCACTGTACTTC
snPVvsSST6.fwd		E25	263	275	-	10.9286	5.83e-05	0.449	CTGCGTCCAGATG
snPVvsKNN1.fwd		E25	171	183	+	11.3279	6.03e-05	0.284	AGGTGCCCTTGTC
PfPVvsNEGrbf3.fwd		E25	171	183	+	11.6061	6.05e-05	0.349	AGGTGCCCTTGTC
MoPVvsEXCrbf1.fwd		E25	171	183	+	10.4388	6.26e-05	0.33	AGGTGCCCTTGTC
MoPVvsVIP6.fwd		E25	12	24	-	11.6571	6.97e-05	0.709	CTCACTGTACTTC
snPVvsEXC1.fwd		E25	171	183	+	10.9898	7.08e-05	0.373	AGGTGCCCTTGTC
PfPVvsNEG10.fwd		E25	203	215	+	11.7237	7.57e-05	0.134	GGCCTCTGGGCTA
snPVvsRandom1.fwd		E25	171	183	+	11.1475	7.75e-05	0.276	AGGTGCCCTTGTC
PfPVvsNEG13.fwd		E25	172	184	-	11.2237	7.96e-05	0.359	TGACAAGGGCACC
PfPVvsNEG1.fwd		E25	171	183	+	11.1061	8.8e-05	0.504	AGGTGCCCTTGTC
snPVvsVIP2.fwd		E25	171	183	+	11.0303	9.35e-05	0.518	AGGTGCCCTTGTC
MoPVvsVIPrbf7.fwd		E26	286	298	-	14.2895	2.2e-06	0.0608	CAGCTCCTCAGAG
snPVvsVIP5.fwd		E26	142	154	+	13.6	3.42e-06	0.0473	GCCACCTGCAGGG
MoPVvsVIP4.fwd		E26	285	297	-	13.8571	3.77e-06	0.157	AGCTCCTCAGAGG
PfPVvsNEGrbf5.fwd		E26	834	846	+	12.7	6.51e-06	0.121	TGACCTGGGACCC
MoPVvsEXC6.fwd		E26	650	662	+	13.6579	1.14e-05	0.158	CGGGACCTTGGCA
PfPVvsNEGrbf12.fwd		E26	592	604	-	13.0526	1.18e-05	0.124	GGTCCTGAGCTTG
snPVvsSST5.fwd		E26	532	544	-	12.2	1.24e-05	0.131	GCAAGGCCAAAGC
snPVvsVIP5.fwd		E26	688	700	-	12.7714	1.28e-05	0.0829	ACCTCCTGCAGGA
snPVvsEXC3.fwd		E26	85	97	-	12.6032	1.35e-05	0.145	CCCAAAATAACCC
snPVvsVIP5.fwd		E26	685	697	+	12.7	1.4e-05	0.0829	TCCTCCTGCAGGA
snPVvsRandom2.fwd		E26	85	97	-	12.5714	1.79e-05	0.141	CCCAAAATAACCC
snPVvsKNN13.fwd		E26	513	525	-	13.0263	2.1e-05	0.289	TACTGGGGCAGTT
PfPVvsNEG10.fwd		E26	833	845	+	12.8553	2.15e-05	0.127	GTGACCTGGGACC
snPVvsRandom2.fwd		E26	133	145	+	12.2698	2.62e-05	0.16	ATTAAAATAGCCA
snPVvsKNN2.fwd		E26	133	145	-	12.0794	2.7e-05	0.155	TGGCTATTTTAAT
snPVvsSST5.fwd		E26	397	409	-	11.7714	2.78e-05	0.168	AGAAGGCCAGAAG
MoPVvsEXC1.fwd		E26	831	843	+	10.7724	2.83e-05	0.305	GAGTGACCTGGGA
snPVvsKNN2.fwd		E26	85	97	+	12.0159	2.89e-05	0.155	GGGTTATTTTGGG
PfPVvsNEG6.fwd		E26	144	156	-	11.7143	2.9e-05	0.136	CGCCCTGCAGGTG
MoPVvsEXCrbf1.fwd		E26	831	843	+	10.8163	2.91e-05	0.307	GAGTGACCTGGGA
snPVvsSST2.fwd		E26	85	97	-	11.9524	3e-05	0.189	CCCAAAATAACCC
snPVvsSST2.fwd		E26	133	145	+	11.9365	3.08e-05	0.189	ATTAAAATAGCCA
MoPVvsVIPrbf7.fwd		E26	209	221	-	12.3026	3.1e-05	0.0705	CTACTCCTCTGCC
snPVvsEXC8.fwd		E26	513	525	-	11.5571	3.11e-05	0.251	TACTGGGGCAGTT
PfPVvsNEGrbf4.fwd		E26	144	156	+	11.803	3.46e-05	0.16	CACCTGCAGGGCG
MoPVvsVIP5.fwd		E26	831	843	+	12.2857	3.66e-05	0.389	GAGTGACCTGGGA
MoPVvsVIPrbf2.fwd		E26	132	144	+	11.9403	3.94e-05	0.241	GATTAAAATAGCC
PfPVvsNEGrbf12.fwd		E26	540	552	-	11.9211	4e-05	0.166	AGCTCTGAGCAAG
snPVvsRandom14.fwd		E26	513	525	-	12.1447	4.28e-05	0.269	TACTGGGGCAGTT
snPVvsVIP4.fwd		E26	132	144	+	11.9583	4.35e-05	0.266	GATTAAAATAGCC
PfPVvsNEGrbf13.fwd		E26	487	499	-	11.7105	4.63e-05	0.142	CCAGAGCCTCCAA
snPVvsVIP4.fwd		E26	86	98	-	11.7917	5.11e-05	0.274	GCCCAAAATAACC
PfPVvsNEGrbf3.fwd		E26	831	843	+	11.7273	5.37e-05	0.349	GAGTGACCTGGGA
snPVvsEXC1.fwd		E26	831	843	+	11.1735	5.44e-05	0.373	GAGTGACCTGGGA
PfPVvsNEG1.fwd		E26	831	843	+	11.6061	5.65e-05	0.476	GAGTGACCTGGGA
MoPVvsVIP10.fwd		E26	401	413	-	11.5132	5.71e-05	0.216	CTGAAGAAGGCCA
MoPVvsVIP11.fwd		E26	553	565	-	11.5526	5.95e-05	0.437	ACGAATCTTCTGT
MoPVvsVIPrbf1.fwd		E26	403	415	-	10.2295	6e-05	0.281	GACTGAAGAAGGC
MoPVvsEXCrbf6.fwd		E26	85	97	+	11.4776	6.07e-05	0.413	GGGTTATTTTGGG
PfPVvsNEGrbf5.fwd		E26	777	789	-	11.4143	6.34e-05	0.204	CCGCCTGGGGCTG
PfPVvsNEGrbf12.fwd		E26	101	113	+	11.3421	6.36e-05	0.192	GGGGCTGAGCTTC
snPVvsVIP10.fwd		E26	70	82	+	10.9342	6.37e-05	0.248	TGACAGCTGTTCC
snPVvsRandom6.fwd		E26	70	82	-	12.0606	6.51e-05	0.19	GGAACAGCTGTCA
MoPVvsEXC5.fwd		E26	85	97	+	11.3194	7.1e-05	0.426	GGGTTATTTTGGG
snPVvsEXC8.fwd		E26	91	103	+	10.7	7.11e-05	0.251	TTTTGGGCCAGGG
snPVvsEXC3.fwd		E26	133	145	+	11.1905	7.22e-05	0.393	ATTAAAATAGCCA
PfPVvsNEG11.fwd		E26	835	847	+	11.1184	7.25e-05	0.305	GACCTGGGACCCT
MoPVvsVIPrbf7.fwd		E26	681	693	+	11.2632	7.51e-05	0.104	ACCCTCCTCCTGC
snPVvsVIP9.fwd		E26	537	549	-	11.5	8.08e-05	0.376	TCTGAGCAAGGCC
snPVvsKNN4.fwd		E26	70	82	-	11.5902	8.26e-05	0.217	GGAACAGCTGTCA
PfPVvsNEG1.fwd		E26	500	512	-	11.1667	8.37e-05	0.504	TGGTGACCTGCAA
MoPVvsVIPrbf7.fwd		E26	714	726	-	11.0658	8.67e-05	0.104	CCCCTCCTCCCAC
PfPVvsNEG7.fwd		E26	85	97	-	11.1667	8.71e-05	0.432	CCCAAAATAACCC
PfPVvsNEGrbf9.fwd		E26	85	97	-	11.0972	9.08e-05	0.409	CCCAAAATAACCC
snPVvsRandom14.fwd		E26	697	709	+	10.5658	9.09e-05	0.351	AGGTGGGGCAAAA
MoPVvsVIP4.fwd		E26	539	551	+	10.9714	9.24e-05	0.26	CCTTGCTCAGAGC
MoPVvsVIP4.fwd		E26	593	605	-	10.9571	9.34e-05	0.26	TGGTCCTGAGCTT
PfPVvsNEGrbf2.fwd		E26	70	82	-	11.5909	9.36e-05	0.154	GGAACAGCTGTCA
MoPVvsEXCrbf8.fwd		E27	918	930	+	14.6842	4.98e-07	0.021	gggctgcagctca
MoPVvsVIP10.fwd		E27	891	903	+	13.2895	1.67e-06	0.067	CTGAAGAAGCAGG
snPVvsVIP9.fwd		E27	929	941	+	14.4079	2.49e-06	0.0521	cagctgcaagagt
snPVvsSST5.fwd		E27	816	828	+	12.7286	2.72e-06	0.0807	CACAGGCCAGAGA
snPVvsKNN2.fwd		E27	371	383	+	13.4127	4.45e-06	0.0953	TGTCTATTTCTAG
snPVvsRandom2.fwd		E27	371	383	-	13.5238	4.69e-06	0.0668	CTAGAAATAGACA
snPVvsEXC7.fwd		E27	918	930	+	12.3788	4.87e-06	0.0519	gggctgcagctca
PfPVvsNEGrbf13.fwd		E27	897	909	-	14.0132	4.93e-06	0.0698	TCTGAGCCTGCTT
snPVvsSST5.fwd		E27	257	269	+	12.4143	7.34e-06	0.104	TTGAGGCCAGAGC
snPVvsRandom3.fwd		E27	918	930	+	11.573	8.35e-06	0.0955	gggctgcagctca
snPVvsSST2.fwd		E27	371	383	-	12.6825	9.28e-06	0.123	CTAGAAATAGACA
PfPVvsNEGrbf12.fwd		E27	923	935	-	13.1974	9.72e-06	0.124	GCAGCTGAGCTGC
PfPVvsNEGrbf8.fwd		E27	847	859	-	13.4857	9.88e-06	0.0815	TACCTTCCTGTCT
PfPVvsNEG7.fwd		E27	371	383	-	13.375	1.13e-05	0.355	CTAGAAATAGACA
MoPVvsEXCrbf8.fwd		E27	917	929	-	13.3158	1.16e-05	0.0978	GAGCTGCAGCCCT
snPVvsEXC3.fwd		E27	371	383	-	12.6667	1.22e-05	0.145	CTAGAAATAGACA
PfPVvsNEGrbf9.fwd		E27	371	383	-	13.3889	1.23e-05	0.409	CTAGAAATAGACA
snPVvsSST7.fwd		E27	92	104	+	13.3611	1.42e-05	0.406	TGTATTTATAAGT
MoPVvsVIPrbf2.fwd		E27	372	384	-	13	1.55e-05	0.166	CCTAGAAATAGAC
snPVvsKNN5.fwd		E27	918	930	+	11.8265	1.62e-05	0.114	gggctgcagctca
PfPVvsNEGrbf13.fwd		E27	263	275	+	12.8158	1.74e-05	0.0926	CCAGAGCCTGAGA
PfPVvsNEG10.fwd		E27	279	291	+	12.9737	1.83e-05	0.127	GCCCCCTGGGAGG
MoPVvsEXCrbf6.fwd		E27	371	383	+	12.6418	1.93e-05	0.276	TGTCTATTTCTAG
snPVvsEXC7.fwd		E27	917	929	-	11.7727	2.13e-05	0.0878	GAGCTGCAGCCCT
PfPVvsNEG5.fwd		E27	847	859	+	12.1743	2.29e-05	0.132	AGACAGGAAGGTA
snPVvsVIP4.fwd		E27	372	384	-	12.5139	2.41e-05	0.255	CCTAGAAATAGAC
PfPVvsNEG10.fwd		E27	506	518	-	12.6579	2.77e-05	0.127	CTCTCCTGGGATG
snPVvsVIP10.fwd		E27	926	938	+	12.5658	2.8e-05	0.248	gctcagctgcaag
MoPVvsVIP8.fwd		E27	372	384	-	12.6883	2.98e-05	0.233	CCTAGAAATAGAC
MoPVvsVIP3.fwd		E27	426	438	+	11.7879	3.02e-05	0.878	GAAGAAGTCATCA
snPVvsEXC6.fwd		E27	926	938	+	13.1061	3.24e-05	0.151	gctcagctgcaag
PfPVvsNEGrbf4.fwd		E27	917	929	-	11.7727	3.58e-05	0.16	GAGCTGCAGCCCT
MoPVvsEXC5.fwd		E27	371	383	+	12.1111	3.66e-05	0.417	TGTCTATTTCTAG
snPVvsKNN4.fwd		E27	414	426	-	12.8197	3.73e-05	0.157	CCCACAGCTGACA
MoPVvsEXC3.fwd		E27	926	938	-	11.9697	3.83e-05	0.179	CTTGCAGCTGAGC
snPVvsEXC6.fwd		E27	413	425	-	12.8788	3.99e-05	0.168	CCACAGCTGACAC
MoPVvsVIP11.fwd		E27	527	539	-	11.8158	4.15e-05	0.437	CCCAATCTTCTGG
MoPVvsEXCrbf4.fwd		E27	413	425	+	12.6212	4.31e-05	0.178	GTGTCAGCTGTGG
PfPVvsNEG6.fwd		E27	917	929	+	11.4	4.34e-05	0.162	Agggctgcagctc
PfPVvsNEGrbf2.fwd		E27	413	425	+	12.5909	4.6e-05	0.154	GTGTCAGCTGTGG
MoPVvsVIPrbf5.fwd		E27	848	860	+	11.7887	4.69e-05	0.121	GACAGGAAGGTAT
MoPVvsVIPrbf3.fwd		E27	26	38	+	11.2571	5.05e-05	0.569	TGTCTAAGGAGAT
snPVvsVIP5.fwd		E27	919	931	-	11.4571	5.36e-05	0.149	CTGAGCTGCAGCC
PfPVvsNEGrbf5.fwd		E27	280	292	+	11.5286	5.54e-05	0.204	CCCCCTGGGAGGT
PfPVvsNEGrbf2.fwd		E27	872	884	-	12.3485	5.61e-05	0.154	GGATCAGCTGGCA
MoPVvsEXCrbf4.fwd		E27	926	938	-	12.1061	6.11e-05	0.193	CTTGCAGCTGAGC
MoPVvsVIPrbf1.fwd		E27	889	901	+	10.2131	6.16e-05	0.281	AGCTGAAGAAGCA
snPVvsEXC8.fwd		E27	520	532	+	10.8571	6.17e-05	0.251	AGCTGGGCCAGAA
snPVvsRandom9.fwd		E27	91	103	-	11.6806	6.26e-05	0.448	CTTATAAATACAG
PfPVvsNEGrbf2.fwd		E27	926	938	-	12.197	6.29e-05	0.154	CTTGCAGCTGAGC
MoPVvsEXC3.fwd		E27	920	932	+	11.2121	6.56e-05	0.205	gctgcagctcagc
PfPVvsNEG10.fwd		E27	449	461	+	11.8553	6.71e-05	0.134	GGATCCTGGGGGT
snPVvsRandom6.fwd		E27	926	938	-	11.9697	6.93e-05	0.19	CTTGCAGCTGAGC
MoPVvsVIP10.fwd		E27	424	436	+	11.3421	6.95e-05	0.241	GGGAAGAAGTCAT
MoPVvsVIPrbf5.fwd		E27	562	574	+	11.2535	7.04e-05	0.141	AGAAGGAAGGGCC
PfPVvsNEG5.fwd		E27	667	679	+	10.8807	7.41e-05	0.171	CTCCAGGATGCAG
PfPVvsNEGrbf8.fwd		E27	667	679	-	11.1857	7.75e-05	0.211	CTGCATCCTGGAG
PfPVvsNEGrbf7.fwd		E27	808	820	-	11.0286	8.18e-05	0.219	CTGTGCTCAGTGG
PfPVvsNEGrbf4.fwd		E27	671	683	+	11.0152	8.22e-05	0.187	AGGATGCAGAAGC
PfPVvsNEGrbf7.fwd		E27	237	249	-	11	8.41e-05	0.219	AGCTGCTCAATGC
snPVvsSST5.fwd		E27	321	333	+	10.8143	8.49e-05	0.247	GCCGGGCCAGGCT
PfPVvsNEG3.fwd		E27	413	425	+	11.7273	8.63e-05	0.229	GTGTCAGCTGTGG
MoPVvsVIP1.fwd		E27	560	572	+	10.5246	8.64e-05	0.212	ATAGAAGGAAGGG
PfPVvsNEGrbf13.fwd		E27	834	846	-	10.8553	8.79e-05	0.166	ACTCAGCCAGGGT
snPVvsRandom6.fwd		E27	414	426	-	11.5758	8.85e-05	0.19	CCCACAGCTGACA
snPVvsEXC6.fwd		E27	871	883	-	11.6818	8.86e-05	0.179	GATCAGCTGGCAT
PfPVvsNEGrbf5.fwd		E27	505	517	-	11.1	8.95e-05	0.218	TCTCCTGGGATGG
snPVvsRandom3.fwd		E27	917	929	-	10.2809	8.96e-05	0.176	GAGCTGCAGCCCT
snPVvsVIP1.fwd		E27	26	38	-	9.28369	9.01e-05	0.382	ATCTCCTTAGACA
MoPVvsVIPrbf3.fwd		E27	901	913	+	10.6429	9.19e-05	0.651	AGGCTCAGAAAAG
snPVvsRandom6.fwd		E27	872	884	-	11.4848	9.33e-05	0.19	GGATCAGCTGGCA
MoPVvsEXC3.fwd		E27	413	425	+	10.7121	9.34e-05	0.207	GTGTCAGCTGTGG
snPVvsKNN5.fwd		E27	917	929	-	10.5816	9.48e-05	0.189	GAGCTGCAGCCCT
snPVvsRandom12.fwd		E27	360	372	+	10.4474	9.64e-05	0.683	TGCTGTGTCATTG
snPVvsKNN4.fwd		E27	926	938	-	11.3443	9.69e-05	0.219	CTTGCAGCTGAGC
PfPVvsNEG3.fwd		E27	926	938	-	11.4697	9.87e-05	0.229	CTTGCAGCTGAGC
PfPVvsNEGrbf5.fwd		E27	450	462	+	11	9.88e-05	0.218	GATCCTGGGGGTG
snPVvsKNN4.fwd		E27	872	884	-	11.3115	9.91e-05	0.219	GGATCAGCTGGCA
PfPVvsNEG8.fwd		E28	282	294	-	14.8143	4.08e-07	0.0171	GGCTGCTGACCTC
PfPVvsNEGrbf7.fwd		E28	112	124	+	14.0857	1.35e-06	0.0312	GGCTGCTGATGCT
snPVvsRandom5.fwd		E28	282	294	-	12.8952	4.9e-06	0.104	GGCTGCTGACCTC
snPVvsKNN11.fwd		E28	113	125	-	13.9079	6.58e-06	0.278	TAGCATCAGCAGC
MoPVvsEXC4.fwd		E28	282	294	+	13.5909	7.21e-06	0.152	GAGGTCAGCAGCC
snPVvsEXC11.fwd		E28	312	324	+	14.4079	1.24e-05	0.16	GGGACATCTGCCT
MoPVvsEXCrbf5.fwd		E28	282	294	-	13.3939	1.25e-05	0.265	GGCTGCTGACCTC
snPVvsVIP1.fwd		E28	173	185	-	10.2695	1.37e-05	0.193	GTCTCCTTCAGCA
snPVvsRandom14.fwd		E28	272	284	+	13.5921	1.67e-05	0.269	AGGTGGGTCAGAG
MoPVvsVIP4.fwd		E28	23	35	+	12.7143	1.86e-05	0.189	ACCTGCTGAGAAT
MoPVvsVIPrbf1.fwd		E28	173	185	+	10.8033	1.93e-05	0.243	TGCTGAAGGAGAC
PfPVvsNEGrbf7.fwd		E28	282	294	-	12.4286	1.96e-05	0.117	GGCTGCTGACCTC
MoPVvsEXCrbf7.fwd		E28	113	125	-	12.7429	2.16e-05	0.343	TAGCATCAGCAGC
snPVvsRandom8.fwd		E28	5	17	-	12.2286	2.56e-05	0.274	TGGCTGATGACAT
PfPVvsNEGrbf2.fwd		E28	103	115	+	13.1515	2.73e-05	0.154	ACTTCAGCTGGCT
PfPVvsNEGrbf12.fwd		E28	352	364	-	12.25	2.96e-05	0.166	ATTCCTGAGCTAA
snPVvsKNN6.fwd		E28	282	294	+	12.4697	3.03e-05	0.232	GAGGTCAGCAGCC
snPVvsKNN13.fwd		E28	380	392	-	12.1579	3.57e-05	0.289	AAATGGGGCAAGG
snPVvsKNN11.fwd		E28	6	18	+	12.3158	3.58e-05	0.4	TGTCATCAGCCAT
snPVvsEXC5.fwd		E28	112	124	+	12.3115	3.6e-05	0.218	GGCTGCTGATGCT
PfPVvsNEG3.fwd		E28	103	115	+	12.8636	3.71e-05	0.208	ACTTCAGCTGGCT
snPVvsEXC9.fwd		E28	5	17	+	12.1974	4.63e-05	0.662	ATGTCATCAGCCA
PfPVvsNEG8.fwd		E28	112	124	+	11.9	4.85e-05	0.259	GGCTGCTGATGCT
MoPVvsEXC4.fwd		E28	112	124	-	12.2273	5.1e-05	0.318	AGCATCAGCAGCC
snPVvsKNN13.fwd		E28	272	284	+	11.4868	5.25e-05	0.289	AGGTGGGTCAGAG
MoPVvsVIP1.fwd		E28	174	186	+	10.7213	5.38e-05	0.15	GCTGAAGGAGACC
MoPVvsVIP13.fwd		E28	113	125	-	11.6184	5.39e-05	0.422	TAGCATCAGCAGC
MoPVvsVIPrbf10.fwd		E28	22	34	-	12.1184	5.51e-05	0.302	TTCTCAGCAGGTT
snPVvsEXC5.fwd		E28	282	294	-	11.918	5.8e-05	0.246	GGCTGCTGACCTC
snPVvsRandom6.fwd		E28	103	115	+	12.2121	5.82e-05	0.19	ACTTCAGCTGGCT
snPVvsSST4.fwd		E28	1	13	-	10.7424	5.87e-05	0.443	TGATGACATCACT
snPVvsRandom14.fwd		E28	380	392	-	11.4605	6.05e-05	0.285	AAATGGGGCAAGG
MoPVvsVIPrbf10.fwd		E28	283	295	+	11.8026	6.43e-05	0.302	AGGTCAGCAGCCT
MoPVvsEXC3.fwd		E28	103	115	+	11.1515	6.85e-05	0.205	ACTTCAGCTGGCT
MoPVvsVIP14.fwd		E28	272	284	-	11.0395	7.24e-05	1	CTCTGACCCACCT
MoPVvsVIP4.fwd		E28	353	365	-	11.3143	7.29e-05	0.253	AATTCCTGAGCTA
MoPVvsEXCrbf7.fwd		E28	6	18	+	11.4286	7.84e-05	0.561	TGTCATCAGCCAT
MoPVvsEXCrbf4.fwd		E28	103	115	+	11.6515	7.9e-05	0.193	ACTTCAGCTGGCT
snPVvsEXC6.fwd		E28	103	115	-	11.8182	8.21e-05	0.179	AGCCAGCTGAAGT
snPVvsKNN10.fwd		E28	5	17	+	11.5	8.98e-05	0.797	ATGTCATCAGCCA
snPVvsKNN11.fwd		E28	149	161	+	10.6974	9.2e-05	0.518	ACCCATCAGCTTG
PfPVvsNEG13.fwd		E28	71	83	+	10.9737	9.25e-05	0.359	TGGCAAGGGCTAA
snPVvsSST5.fwd		E28	366	378	-	10.7143	9.35e-05	0.247	TGGGGGCCAAGAC
snPVvsKNN6.fwd		E28	23	35	-	11.2121	9.37e-05	0.285	ATTCTCAGCAGGT
MoPVvsVIP5.fwd		E29	208	220	-	16.4714	4.08e-08	0.00174	GTGTGACCTTGGA
MoPVvsVIPrbf6.fwd		E29	208	220	-	15.7429	8.44e-08	0.0036	GTGTGACCTTGGA
snPVvsKNN4.fwd		E29	216	228	+	14.8197	9.69e-08	0.00407	cacacagctgggg
snPVvsVIP2.fwd		E29	208	220	-	13.8333	5.28e-07	0.0224	GTGTGACCTTGGA
snPVvsKNN1.fwd		E29	208	220	-	13.5738	6.94e-07	0.0278	GTGTGACCTTGGA
snPVvsRandom1.fwd		E29	208	220	-	13.6557	7.18e-07	0.0307	GTGTGACCTTGGA
snPVvsEXC1.fwd		E29	208	220	-	13.0918	7.77e-07	0.0328	GTGTGACCTTGGA
snPVvsRandom2.fwd		E29	307	319	-	14.3333	1.01e-06	0.043	ATAAAAATAGCCA
snPVvsEXC6.fwd		E29	217	229	+	15.0758	1.02e-06	0.0215	acacagctggggc
snPVvsKNN2.fwd		E29	307	319	+	14.1429	1.13e-06	0.0485	TGGCTATTTTTAT
PfPVvsNEGrbf3.fwd		E29	208	220	-	14.1061	1.32e-06	0.038	GTGTGACCTTGGA
PfPVvsNEGrbf7.fwd		E29	378	390	-	14.0286	1.5e-06	0.0312	GCCTGCTGAGGCC
snPVvsEXC3.fwd		E29	307	319	-	13.7143	1.56e-06	0.067	ATAAAAATAGCCA
MoPVvsEXCrbf4.fwd		E29	217	229	-	14.9848	1.83e-06	0.0378	GCCCCAGCTGTGT
PfPVvsNEG1.fwd		E29	208	220	-	13.8485	1.88e-06	0.0396	GTGTGACCTTGGA
snPVvsSST2.fwd		E29	307	319	-	13.4921	2.22e-06	0.0686	ATAAAAATAGCCA
MoPVvsEXCrbf1.fwd		E29	208	220	-	11.7143	2.24e-06	0.0947	GTGTGACCTTGGA
PfPVvsNEG3.fwd		E29	217	229	-	14.6818	3.01e-06	0.0629	GCCCCAGCTGTGT
snPVvsVIP4.fwd		E29	308	320	-	13.9583	4.59e-06	0.0983	AATAAAAATAGCC
snPVvsRandom6.fwd		E29	216	228	+	13.9545	5.07e-06	0.096	cacacagctgggg
MoPVvsEXC1.fwd		E29	208	220	-	11.3496	5.14e-06	0.217	GTGTGACCTTGGA
snPVvsSST1.fwd		E29	208	220	-	11.8276	6.04e-06	0.203	GTGTGACCTTGGA
snPVvsSST4.fwd		E29	281	293	-	11.7879	6.16e-06	0.204	AGCTGACATCGGG
MoPVvsVIPrbf2.fwd		E29	308	320	-	13.791	6.85e-06	0.128	AATAAAAATAGCC
MoPVvsVIP8.fwd		E29	308	320	-	14.2078	7.58e-06	0.163	AATAAAAATAGCC
MoPVvsEXC5.fwd		E29	307	319	+	13.5417	7.65e-06	0.328	TGGCTATTTTTAT
MoPVvsEXCrbf6.fwd		E29	307	319	+	13.3134	8.51e-06	0.276	TGGCTATTTTTAT
MoPVvsEXC3.fwd		E29	217	229	-	13.5455	8.99e-06	0.0947	GCCCCAGCTGTGT
PfPVvsNEGrbf2.fwd		E29	217	229	-	14.0152	9.33e-06	0.154	GCCCCAGCTGTGT
PfPVvsNEG7.fwd		E29	307	319	-	13.0139	1.66e-05	0.355	ATAAAAATAGCCA
MoPVvsVIP10.fwd		E29	69	81	-	12.2632	1.89e-05	0.192	TCCGAGAAGGAGT
MoPVvsVIP10.fwd		E29	88	100	-	12.2632	1.89e-05	0.192	TCCGAGAAGGAGT
snPVvsEXC8.fwd		E29	135	147	+	11.9571	1.9e-05	0.251	TTCTGGGACagat
MoPVvsVIP4.fwd		E29	378	390	-	12.5286	2.24e-05	0.189	GCCTGCTGAGGCC
PfPVvsNEGrbf12.fwd		E29	225	237	+	12.5132	2.26e-05	0.166	ggggctgagctca
MoPVvsEXC6.fwd		E29	207	219	-	12.8684	2.31e-05	0.177	TGTGACCTTGGAA
PfPVvsNEGrbf9.fwd		E29	307	319	-	12.6111	2.72e-05	0.409	ATAAAAATAGCCA
MoPVvsVIPrbf7.fwd		E29	251	263	+	12.1711	3.52e-05	0.0705	cctctcctctgct
snPVvsRandom14.fwd		E29	135	147	+	12.4474	3.58e-05	0.269	TTCTGGGACagat
MoPVvsVIPrbf7.fwd		E29	188	200	-	12.1184	3.7e-05	0.0707	CTCCTCCTCCAGC
MoPVvsVIPrbf10.fwd		E29	379	391	+	12.6974	3.86e-05	0.302	GCCTCAGCAGGCA
MoPVvsEXCrbf5.fwd		E29	378	390	-	12.5606	3.94e-05	0.336	GCCTGCTGAGGCC
MoPVvsVIPrbf11.fwd		E29	46	58	+	11.8289	3.97e-05	0.556	AGGGAAGATGATG
MoPVvsVIPrbf4.fwd		E29	198	210	-	12.2714	4.01e-05	1	GGAAAAGTCACTC
snPVvsVIP1.fwd		E29	446	458	+	9.65248	4.81e-05	0.35	TGTTCCTTAAAGA
MoPVvsVIP1.fwd		E29	387	399	+	10.7541	4.9e-05	0.15	AGGCAAGGAAAAG
snPVvsEXC5.fwd		E29	378	390	-	12.0492	5.01e-05	0.236	GCCTGCTGAGGCC
snPVvsKNN4.fwd		E29	286	298	-	12.3934	5.12e-05	0.196	AGAGCAGCTGACA
snPVvsKNN13.fwd		E29	135	147	+	11.4868	5.25e-05	0.289	TTCTGGGACagat
snPVvsRandom1.fwd		E29	366	378	-	11.4754	5.27e-05	0.276	CGGTGTCCTAGAG
PfPVvsNEG8.fwd		E29	378	390	-	11.7857	5.42e-05	0.259	GCCTGCTGAGGCC
PfPVvsNEG6.fwd		E29	401	413	-	11.1714	5.67e-05	0.171	GTGCCTGCAGTGA
PfPVvsNEGrbf13.fwd		E29	343	355	+	11.4474	5.69e-05	0.147	GCAGAGCCATGTA
PfPVvsNEG10.fwd		E29	270	282	-	12.0132	5.78e-05	0.134	GGTGCCTGGGAGG
snPVvsRandom5.fwd		E29	378	390	-	11.3871	5.78e-05	0.349	GCCTGCTGAGGCC
snPVvsKNN6.fwd		E29	378	390	+	11.8939	5.86e-05	0.232	GGCCTCAGCAGGC
MoPVvsVIP7.fwd		E29	587	599	+	11.0526	5.91e-05	0.469	GACTAAGACTTGA
snPVvsSST6.fwd		E29	462	474	+	10.9143	5.92e-05	0.449	CCCTGTCCTGGGC
PfPVvsNEGrbf4.fwd		E29	401	413	+	11.3333	5.96e-05	0.16	TCACTGCAGGCAC
PfPVvsNEG8.fwd		E29	284	296	-	11.6286	6.19e-05	0.259	AGCAGCTGACATC
MoPVvsVIP3.fwd		E29	198	210	-	11.2576	6.23e-05	0.878	GGAAAAGTCACTC
MoPVvsVIP2.fwd		E29	447	459	+	10.3065	6.5e-05	0.451	GTTCCTTAAAGAC
snPVvsRandom6.fwd		E29	286	298	-	12	6.79e-05	0.19	AGAGCAGCTGACA
PfPVvsNEGrbf2.fwd		E29	286	298	-	12.0758	6.85e-05	0.154	AGAGCAGCTGACA
MoPVvsVIPrbf9.fwd		E29	587	599	+	11.4342	6.95e-05	0.643	GACTAAGACTTGA
MoPVvsEXC4.fwd		E29	378	390	+	11.8182	7.25e-05	0.318	GGCCTCAGCAGGC
PfPVvsNEG10.fwd		E29	464	476	+	11.7105	7.69e-05	0.134	CTGTCCTGGGCTT
PfPVvsNEGrbf11.fwd		E29	207	219	-	11.1711	8.3e-05	0.289	TGTGACCTTGGAA
MoPVvsVIPrbf7.fwd		E29	265	277	+	11.0921	8.51e-05	0.104	cccctcctcccag
MoPVvsVIPrbf7.fwd		E29	191	203	-	11.0132	9e-05	0.105	TCACTCCTCCTCC
snPVvsKNN1.fwd		E29	366	378	-	10.918	9.35e-05	0.359	CGGTGTCCTAGAG
snPVvsKNN13.fwd		E29	475	487	+	10.4211	9.43e-05	0.319	TTCTGGGTCTCCA
PfPVvsNEGrbf5.fwd		E29	429	441	+	11.0286	9.6e-05	0.218	TTGCCTGGGGGAA
MoPVvsEXCrbf4.fwd		E29	285	297	+	11.2424	9.61e-05	0.202	atgtcagCTGCTC
snPVvsSST1.fwd		E29	500	512	-	10.4828	9.64e-05	0.45	TTCTGACCTCTAA
snPVvsEXC6.fwd		E29	285	297	-	11.5	9.64e-05	0.179	GAGCAGCTGACAT
snPVvsEXC1.fwd		E29	366	378	-	10.7449	9.68e-05	0.38	CGGTGTCCTAGAG
snPVvsVIP10.fwd		E29	286	298	+	9.98684	9.84e-05	0.281	tgtcagCTGCTCT
PfPVvsNEGrbf7.fwd		E3	715	727	-	13.2857	5.91e-06	0.0615	AGCTGCTGAGTAA
MoPVvsVIP1.fwd		E3	580	592	-	11.2295	6.94e-06	0.124	ACAGAAGGAAGCA
PfPVvsNEGrbf4.fwd		E3	674	686	+	12.697	9.06e-06	0.125	GGGCTGCAGAGAA
PfPVvsNEG6.fwd		E3	674	686	-	12.4571	9.23e-06	0.117	TTCTCTGCAGCCC
snPVvsKNN5.fwd		E3	673	685	-	11.9184	1.35e-05	0.114	TCTCTGCAGCCCA
snPVvsEXC5.fwd		E3	715	727	-	12.8361	1.47e-05	0.155	AGCTGCTGAGTAA
snPVvsRandom3.fwd		E3	673	685	-	11.3258	1.53e-05	0.106	TCTCTGCAGCCCA
snPVvsEXC7.fwd		E3	673	685	-	11.9091	1.6e-05	0.0783	TCTCTGCAGCCCA
MoPVvsVIPrbf5.fwd		E3	578	590	-	12.6479	2.03e-05	0.101	AGAAGGAAGCATG
PfPVvsNEG6.fwd		E3	742	754	-	11.9	2.22e-05	0.136	TTGTCTGCAGCCA
MoPVvsVIPrbf5.fwd		E3	798	810	+	12.5493	2.24e-05	0.101	AAAAGGAAGGCAG
MoPVvsEXCrbf8.fwd		E3	674	686	+	12.8553	2.27e-05	0.137	GGGCTGCAGAGAA
PfPVvsNEG8.fwd		E3	715	727	-	12.5429	2.54e-05	0.259	AGCTGCTGAGTAA
MoPVvsVIPrbf7.fwd		E3	698	710	+	12.4737	2.62e-05	0.0647	TCCCTCCTCTGCT
snPVvsVIP5.fwd		E3	740	752	+	12.1286	2.76e-05	0.115	GCTGGCTGCAGAC
snPVvsKNN6.fwd		E3	715	727	+	12.4545	3.1e-05	0.232	TTACTCAGCAGCT
PfPVvsNEGrbf4.fwd		E3	742	754	+	11.8788	3.12e-05	0.16	TGGCTGCAGACAA
PfPVvsNEGrbf13.fwd		E3	639	651	-	12.1447	3.23e-05	0.125	TCTCAGCCTGGAG
MoPVvsVIPrbf10.fwd		E3	716	728	+	12.7237	3.79e-05	0.302	TACTCAGCAGCTT
snPVvsKNN8.fwd		E3	95	107	+	12.2	4.52e-05	0.412	TTTTATTTAGCCA
snPVvsRandom3.fwd		E3	741	753	-	10.7528	4.52e-05	0.158	TGTCTGCAGCCAG
MoPVvsEXCrbf8.fwd		E3	742	754	+	12.2105	4.72e-05	0.164	TGGCTGCAGACAA
MoPVvsVIPrbf13.fwd		E3	812	824	+	12.0789	4.74e-05	0.645	GAGGAAATCAGCT
snPVvsVIP13.fwd		E3	95	107	-	11.747	5.14e-05	0.552	TGGCTAAATAAAA
PfPVvsNEGrbf13.fwd		E3	652	664	-	11.5263	5.36e-05	0.147	CCTCAGCCAGGAC
snPVvsEXC8.fwd		E3	291	303	+	10.9429	5.73e-05	0.251	TACCGGGACACGG
snPVvsRandom9.fwd		E3	95	107	-	11.7083	6.13e-05	0.448	TGGCTAAATAAAA
MoPVvsEXCrbf8.fwd		E3	673	685	-	11.9211	6.16e-05	0.164	TCTCTGCAGCCCA
MoPVvsEXCrbf5.fwd		E3	715	727	-	12.0152	6.32e-05	0.336	AGCTGCTGAGTAA
PfPVvsNEG6.fwd		E3	741	753	+	11.0429	6.58e-05	0.173	CTGGCTGCAGACA
snPVvsRandom5.fwd		E3	715	727	-	11.1855	6.89e-05	0.349	AGCTGCTGAGTAA
MoPVvsEXCrbf7.fwd		E3	814	826	+	11.5571	6.99e-05	0.561	GGAAATCAGCTAC
MoPVvsEXC6.fwd		E3	509	521	-	10.9342	7.13e-05	0.331	GGAGACCTTCAAG
snPVvsKNN5.fwd		E3	741	753	-	10.8265	7.15e-05	0.165	TGTCTGCAGCCAG
snPVvsRandom13.fwd		E3	731	743	-	10.9474	7.48e-05	0.66	CAGCCACATGCAG
snPVvsVIP2.fwd		E3	240	252	-	11.2121	8e-05	0.518	CTTTGCCCTTCAG
MoPVvsVIP11.fwd		E3	142	154	+	11.2632	8.2e-05	0.437	GTACATCTTGTTA
MoPVvsEXC4.fwd		E3	715	727	+	11.6364	8.31e-05	0.318	TTACTCAGCAGCT
PfPVvsNEGrbf4.fwd		E3	741	753	-	10.9848	8.47e-05	0.187	TGTCTGCAGCCAG
snPVvsVIP6.fwd		E3	812	824	-	11.3	8.65e-05	0.927	AGCTGATTTCCTC
MoPVvsVIP5.fwd		E3	240	252	-	10.9143	9.25e-05	0.656	CTTTGCCCTTCAG
snPVvsKNN11.fwd		E3	655	667	-	10.6053	9.8e-05	0.518	CAGCCTCAGCCAG
MoPVvsVIPrbf12.fwd		E3	814	826	+	10.3158	9.89e-05	0.422	GGAAATCAGCTAC
snPVvsEXC1.fwd		E3	240	252	-	10.7245	9.9e-05	0.38	CTTTGCCCTTCAG
MoPVvsVIPrbf3.fwd		E30	67	79	-	12.5143	2.64e-06	0.112	GTGCTAAGAAGGA
MoPVvsVIP9.fwd		E30	67	79	+	12.6711	8.01e-06	0.184	TCCTTCTTAGCAC
MoPVvsVIP12.fwd		E30	181	193	+	13.5195	1.28e-05	0.265	CGTCTAAAAATTC
snPVvsRandom11.fwd		E30	672	684	+	13.2763	2.5e-05	0.537	AAAGCAATTTCAT
MoPVvsVIPrbf9.fwd		E30	36	48	-	12.0263	2.87e-05	0.408	TTGTAAGACTCCA
MoPVvsVIP10.fwd		E30	65	77	-	12	2.88e-05	0.192	GCTAAGAAGGAGT
snPVvsRandom14.fwd		E30	252	264	+	12.6053	3.27e-05	0.269	ATCAGGGTCACAC
snPVvsEXC8.fwd		E30	252	264	+	11.2571	4.25e-05	0.251	ATCAGGGTCACAC
PfPVvsNEG2.fwd		E30	248	260	+	11.2121	4.76e-05	1	CTAAATCAGGGTC
MoPVvsEXCrbf1.fwd		E30	252	264	-	10.5816	4.76e-05	0.33	GTGTGACCCTGAT
snPVvsVIP7.fwd		E30	261	273	-	11.9605	5.16e-05	0.92	ACCCTTGATGTGT
MoPVvsVIP7.fwd		E30	36	48	-	11.0789	5.72e-05	0.469	TTGTAAGACTCCA
MoPVvsEXC1.fwd		E30	252	264	-	10.374	6.64e-05	0.561	GTGTGACCCTGAT
snPVvsKNN13.fwd		E30	252	264	+	11.0526	6.66e-05	0.289	ATCAGGGTCACAC
snPVvsVIP13.fwd		E30	181	193	+	11.3614	6.96e-05	0.552	CGTCTAAAAATTC
MoPVvsVIP6.fwd		E30	491	503	-	11.5286	7.76e-05	0.709	AGCACTGTAGTTA
snPVvsVIP13.fwd		E30	165	177	+	11.1687	7.94e-05	0.552	TATCTAAAAAAGA
MoPVvsVIPrbf8.fwd		E30	491	503	-	11.4474	8.24e-05	0.683	AGCACTGTAGTTA
MoPVvsVIPrbf13.fwd		E30	14	26	+	10.5526	9.03e-05	0.645	TAAGAAATCATGA
snPVvsKNN9.fwd		E31	202	214	+	12.2143	3.02e-05	0.633	GTATCACGTGAAA
MoPVvsVIPrbf7.fwd		E31	105	117	-	12.25	3.27e-05	0.0705	TACCTCCTCACAC
snPVvsEXC10.fwd		E31	202	214	+	11.3158	5.92e-05	1	GTATCACGTGAAA
MoPVvsVIPrbf13.fwd		E31	159	171	-	11.5789	5.97e-05	0.645	ACTGAAATCAAAG
snPVvsRandom13.fwd		E31	15	27	+	11.0921	6.67e-05	0.66	AAGCCACATGAGG
snPVvsVIP6.fwd		E31	159	171	+	11.5571	7.22e-05	0.927	CTTTGATTTCAGT
snPVvsRandom10.fwd		E31	202	214	+	11.0395	7.22e-05	1	GTATCACGTGAAA
MoPVvsVIP15.fwd		E31	159	171	-	10.6585	7.74e-05	0.951	ACTGAAATCAAAG
PfPVvsNEGrbf13.fwd		E31	25	37	-	10.7105	9.72e-05	0.167	TCAAAGCCTGCCT
PfPVvsNEG5.fwd		E32	65	77	+	11.8991	2.88e-05	0.132	TCCCAGGAGGCCT
PfPVvsNEGrbf7.fwd		E32	135	147	-	12.0429	3.02e-05	0.157	GGCTGCTCAGATA
MoPVvsEXCrbf7.fwd		E32	121	133	+	12.3714	3.2e-05	0.343	TGACATCAGGAGA
PfPVvsNEG10.fwd		E32	63	75	-	12.4211	3.72e-05	0.134	GCCTCCTGGGAAG
MoPVvsVIPrbf1.fwd		E32	18	30	-	10.3607	4.77e-05	0.281	TGTTCAAGAAGGA
PfPVvsNEGrbf5.fwd		E32	62	74	-	11.5714	5.23e-05	0.204	CCTCCTGGGAAGG
MoPVvsVIP4.fwd		E32	135	147	-	11.6286	5.67e-05	0.253	GGCTGCTCAGATA
snPVvsSST6.fwd		E32	76	88	+	10.8286	6.44e-05	0.449	CTGTGCCCAGTCT
snPVvsEXC11.fwd		E32	248	260	+	10.8553	7.86e-05	0.667	GGAGCATCTGGTG
PfPVvsNEGrbf8.fwd		E32	65	77	-	11.0429	8.53e-05	0.211	AGGCCTCCTGGGA
snPVvsKNN4.fwd		E32	248	260	+	11.4262	9.19e-05	0.219	GGAGCATCTGGTG
snPVvsRandom6.fwd		E32	248	260	+	11.3939	9.76e-05	0.19	GGAGCATCTGGTG
MoPVvsVIP10.fwd		E32	16	28	-	10.9868	9.92e-05	0.318	TTCAAGAAGGATC
PfPVvsNEG12.fwd		E33	331	343	-	14.4342	1.25e-05	0.536	TATTGATTGCAGG
MoPVvsVIPrbf5.fwd		E33	168	180	+	12.8451	1.59e-05	0.101	GGGAGGAAGTTGC
MoPVvsVIPrbf11.fwd		E33	649	661	+	12.2105	2.59e-05	0.544	AGAGAAGATGTAA
MoPVvsEXCrbf3.fwd		E33	332	344	+	11.803	2.87e-05	1	CTGCAATCAATAA
snPVvsEXC4.fwd		E33	331	343	+	11.629	4.03e-05	1	CCTGCAATCAATA
MoPVvsVIPrbf12.fwd		E33	697	709	+	11.7237	4.18e-05	0.346	TCGAGTCAGCCGC
PfPVvsNEG10.fwd		E33	91	103	+	12.3158	4.2e-05	0.134	GCAGCCTGGGAGC
PfPVvsNEGrbf7.fwd		E33	357	369	+	11.7429	4.22e-05	0.175	AGCTGCTGAAACC
PfPVvsNEGrbf6.fwd		E33	696	708	+	12.1143	4.23e-05	0.451	TTCGAGTCAGCCG
MoPVvsVIP15.fwd		E33	331	343	+	11.9512	4.25e-05	0.911	CCTGCAATCAATA
snPVvsVIP6.fwd		E33	331	343	-	12.2286	4.27e-05	0.915	TATTGATTGCAGG
MoPVvsVIP11.fwd		E33	649	661	-	11.7237	4.76e-05	0.437	TTACATCTTCTCT
PfPVvsNEGrbf7.fwd		E33	135	147	-	11.1571	7.3e-05	0.219	CGGAGCTGAGGGG
snPVvsEXC4.fwd		E33	725	737	+	11.1613	7.83e-05	1	TTACCAATCAAGT
PfPVvsNEG11.fwd		E33	679	691	-	11	8.16e-05	0.312	TCTATGGGGACAG
snPVvsVIP10.fwd		E33	251	263	-	10.3421	8.37e-05	0.256	CAACGGCTGCAAC
PfPVvsNEGrbf5.fwd		E33	92	104	+	11.1429	8.57e-05	0.218	CAGCCTGGGAGCT
snPVvsKNN8.fwd		E33	669	681	+	11.4857	8.63e-05	0.463	TTAAATTTAGCTG
snPVvsKNN13.fwd		E33	240	252	+	10.5526	8.77e-05	0.319	AATTGGGTGACGT
PfPVvsNEG9.fwd		E33	696	708	-	11.0286	8.8e-05	0.743	CGGCTGACTCGAA
snPVvsVIP13.fwd		E33	669	681	-	11.012	8.93e-05	0.552	CAGCTAAATTTAA
MoPVvsEXCrbf3.fwd		E33	726	738	+	11.1515	9.07e-05	1	TACCAATCAAGTC
snPVvsKNN6.fwd		E33	357	369	-	11.197	9.44e-05	0.285	GGTTTCAGCAGCT
PfPVvsNEGrbf12.fwd		E34	174	186	+	12.1447	3.28e-05	0.166	GCCCCTGAGCACT
PfPVvsNEGrbf7.fwd		E34	175	187	-	11.3857	5.96e-05	0.207	AAGTGCTCAGGGG
MoPVvsVIP7.fwd		E34	162	174	-	10.9605	6.72e-05	0.469	CTCGGAGACACTT
PfPVvsNEGrbf13.fwd		E34	26	38	-	11.1842	6.93e-05	0.147	GGAGAGCCGGGAC
snPVvsEXC10.fwd		E34	74	86	-	10.8816	8.53e-05	1	AAGCCACGGGGTT
snPVvsVIP5.fwd		E35	405	417	+	13.7	2.94e-06	0.0473	CCCTGCTGCAGAA
MoPVvsVIP10.fwd		E35	182	194	+	13.0526	3.21e-06	0.067	GAGGAgaaggagg
MoPVvsVIPrbf7.fwd		E35	178	190	-	13.6053	6.75e-06	0.0608	CTTCTCCTCAGAT
snPVvsEXC5.fwd		E35	284	296	+	12.9672	1.09e-05	0.155	TTTTGCTGAGTCA
snPVvsKNN6.fwd		E35	284	296	-	12.9091	1.47e-05	0.207	TGACTCAGCAAAA
snPVvsKNN12.fwd		E35	287	299	-	13.4605	1.59e-05	0.334	ACTTGACTCAGCA
MoPVvsVIPrbf10.fwd		E35	283	295	-	13.4868	1.83e-05	0.302	GACTCAGCAAAAG
snPVvsRandom12.fwd		E35	287	299	+	13.6316	1.86e-05	0.396	TGCTGAGTCAAGT
MoPVvsVIP1.fwd		E35	204	216	+	11	2.07e-05	0.124	agggaaggagaca
snPVvsSST6.fwd		E35	322	334	-	11.7571	2.25e-05	0.449	GCAAGTCCAGAGC
MoPVvsVIP4.fwd		E35	177	189	-	12.4286	2.5e-05	0.189	TTCTCCTCAGATA
MoPVvsVIPrbf5.fwd		E35	189	201	+	12.4507	2.5e-05	0.101	aggaggaagggag
MoPVvsEXC6.fwd		E35	479	491	+	12.75	2.55e-05	0.177	TGGGACCTTGGAG
MoPVvsVIPrbf5.fwd		E35	202	214	+	12.338	2.82e-05	0.101	ggagggaaggaga
snPVvsRandom5.fwd		E35	284	296	+	11.9758	2.94e-05	0.311	TTTTGCTGAGTCA
MoPVvsVIP13.fwd		E35	285	297	-	12.4605	3.38e-05	0.422	TTGACTCAGCAAA
snPVvsVIP5.fwd		E35	408	420	-	11.9143	3.45e-05	0.13	ACTTTCTGCAGCA
PfPVvsNEG6.fwd		E35	407	419	-	11.5143	3.77e-05	0.159	CTTTCTGCAGCAG
MoPVvsEXCrbf5.fwd		E35	284	296	+	12.5455	4.01e-05	0.336	TTTTGCTGAGTCA
MoPVvsVIP1.fwd		E35	184	196	+	10.8197	4.01e-05	0.14	GGAgaaggaggaa
snPVvsKNN9.fwd		E35	331	343	-	11.7429	4.67e-05	0.652	TGGTCACATGCAA
PfPVvsNEGrbf4.fwd		E35	407	419	+	11.5303	4.77e-05	0.16	CTGCTGCAGAAAG
MoPVvsVIPrbf12.fwd		E35	285	297	-	11.3684	5.28e-05	0.346	TTGACTCAGCAAA
snPVvsRandom3.fwd		E35	406	418	-	10.6067	5.64e-05	0.158	TTTCTGCAGCAGG
MoPVvsEXC4.fwd		E35	284	296	-	11.9091	6.74e-05	0.318	TGACTCAGCAAAA
snPVvsRandom13.fwd		E35	331	343	-	11.0263	7.05e-05	0.66	TGGTCACATGCAA
MoPVvsVIP11.fwd		E35	86	98	-	11.3553	7.52e-05	0.437	AATCATCTTGGGC
MoPVvsEXC5.fwd		E35	341	353	-	11.1806	7.95e-05	0.426	ATCCTATTTGTGG
MoPVvsEXCrbf6.fwd		E35	341	353	-	11	9.03e-05	0.43	ATCCTATTTGTGG
snPVvsEXC7.fwd		E35	406	418	-	10.803	9.74e-05	0.201	TTTCTGCAGCAGG
MoPVvsVIPrbf5.fwd		E35	222	234	+	10.7606	9.95e-05	0.143	ggagggaaggaca
snPVvsRandom9.fwd		E4	144	156	+	13.2361	1.05e-05	0.226	TTTCTAAATACAA
PfPVvsNEG1.fwd		E4	73	85	-	12.3333	2.51e-05	0.352	AACTGACCTTCTA
snPVvsVIP2.fwd		E4	73	85	-	12.2273	2.55e-05	0.361	AACTGACCTTCTA
PfPVvsNEGrbf3.fwd		E4	73	85	-	12.1364	3.49e-05	0.349	AACTGACCTTCTA
MoPVvsVIP5.fwd		E4	73	85	-	11.8429	5.07e-05	0.431	AACTGACCTTCTA
snPVvsKNN8.fwd		E4	144	156	-	12.1	5.07e-05	0.412	TTGTATTTAGAAA
snPVvsSST1.fwd		E4	73	85	-	10.8621	5.09e-05	0.361	AACTGACCTTCTA
snPVvsSST7.fwd		E4	143	155	-	11.5139	5.68e-05	0.406	TGTATTTAGAAAT
snPVvsKNN1.fwd		E4	73	85	-	11.377	5.71e-05	0.284	AACTGACCTTCTA
snPVvsRandom1.fwd		E4	73	85	-	11.3115	6.41e-05	0.276	AACTGACCTTCTA
snPVvsEXC1.fwd		E4	73	85	-	11.0204	6.79e-05	0.373	AACTGACCTTCTA
MoPVvsVIPrbf6.fwd		E4	73	85	-	11.8	7.07e-05	0.933	AACTGACCTTCTA
MoPVvsVIP9.fwd		E4	157	169	+	10.7237	9.13e-05	0.79	AACATCTTAGTAT
snPVvsVIP7.fwd		E5	609	621	+	14.4342	2.92e-06	0.125	ATTCTTGATTTAG
PfPVvsNEG10.fwd		E5	312	324	+	13.8947	3.63e-06	0.0747	GGTGCCTGGGACC
PfPVvsNEGrbf5.fwd		E5	313	325	+	12.3286	1.52e-05	0.123	GTGCCTGGGACCA
snPVvsSST7.fwd		E5	327	339	-	13.0139	1.94e-05	0.406	GATATTTATAAAC
snPVvsKNN13.fwd		E5	237	249	-	12.8553	2.35e-05	0.289	GACTGGGGCAAAT
snPVvsEXC5.fwd		E5	229	241	+	12.541	2.55e-05	0.18	AAATGCTGATTTG
MoPVvsEXCrbf7.fwd		E5	230	242	-	12.3714	3.2e-05	0.343	GCAAATCAGCATT
MoPVvsEXC4.fwd		E5	229	241	-	12.5152	3.74e-05	0.318	CAAATCAGCATTT
snPVvsRandom14.fwd		E5	237	249	-	12.25	4.02e-05	0.269	GACTGGGGCAAAT
MoPVvsVIPrbf5.fwd		E5	157	169	+	11.8028	4.62e-05	0.121	ATGAGGAAGCAAA
snPVvsEXC8.fwd		E5	237	249	-	11.0714	5.1e-05	0.251	GACTGGGGCAAAT
PfPVvsNEG8.fwd		E5	229	241	+	11.7143	5.76e-05	0.259	AAATGCTGATTTG
snPVvsKNN8.fwd		E5	7	19	+	11.9714	5.76e-05	0.412	TGATATTTAGGAG
MoPVvsEXC5.fwd		E5	403	415	+	11.5833	5.83e-05	0.417	GTGGTATTTATGG
MoPVvsVIPrbf12.fwd		E5	230	242	-	11.2105	5.84e-05	0.346	GCAAATCAGCATT
PfPVvsNEGrbf9.fwd		E5	403	415	-	11.6944	5.88e-05	0.409	CCATAAATACCAC
snPVvsKNN6.fwd		E5	337	349	-	11.8636	6.03e-05	0.232	TCATTCAGCAGAT
MoPVvsEXCrbf6.fwd		E5	403	415	+	11.4776	6.07e-05	0.413	GTGGTATTTATGG
PfPVvsNEG7.fwd		E5	403	415	-	11.5833	6.28e-05	0.432	CCATAAATACCAC
snPVvsVIP7.fwd		E5	137	149	-	11.6711	6.46e-05	0.92	GATCTTGATTCCA
MoPVvsVIP2.fwd		E5	570	582	+	10.3065	6.5e-05	0.451	AGTTCTTGAATAT
MoPVvsVIP13.fwd		E5	230	242	-	11.1316	6.95e-05	0.424	GCAAATCAGCATT
PfPVvsNEGrbf9.fwd		E5	329	341	+	11.3194	7.75e-05	0.409	TTATAAATATCTG
snPVvsRandom10.fwd		E5	299	311	-	10.9605	7.86e-05	1	CTGCCACGAGCAG
PfPVvsNEGrbf10.fwd		E5	555	567	+	10.9722	7.92e-05	1	GTCTCATTACAGC
snPVvsKNN2.fwd		E5	403	415	+	10.9365	8.55e-05	0.398	GTGGTATTTATGG
PfPVvsNEGrbf7.fwd		E5	337	349	+	10.9286	8.97e-05	0.219	ATCTGCTGAATGA
snPVvsRandom5.fwd		E5	229	241	+	10.8226	9.16e-05	0.349	AAATGCTGATTTG
snPVvsEXC5.fwd		E5	337	349	+	11.3934	9.73e-05	0.318	ATCTGCTGAATGA
snPVvsRandom9.fwd		E5	328	340	+	11.125	9.94e-05	0.609	TTTATAAATATCT
MoPVvsVIP1.fwd		E6	86	98	-	11.2787	5.27e-06	0.124	AGGGAAGGAAATG
MoPVvsVIPrbf5.fwd		E6	154	166	-	13.4225	7.37e-06	0.101	TGAAGGAAGGCAC
PfPVvsNEGrbf13.fwd		E6	259	271	-	13.3026	1.07e-05	0.091	TCAGAGCCAGCTG
MoPVvsVIP12.fwd		E6	362	374	+	12.6623	2.34e-05	0.265	CTTTTAAAAATGG
PfPVvsNEG10.fwd		E6	546	558	+	12.3816	3.9e-05	0.134	GACCTCTGGGTTC
MoPVvsVIPrbf5.fwd		E6	88	100	-	11.8873	4.29e-05	0.121	TGAGGGAAGGAAA
MoPVvsVIPrbf8.fwd		E6	13	25	-	11.8289	5.86e-05	0.683	AACACTGTAGAGT
snPVvsEXC6.fwd		E6	256	268	+	12.1061	7.07e-05	0.179	GGTCAGCTGGCTC
PfPVvsNEGrbf2.fwd		E6	255	267	+	11.9848	7.31e-05	0.154	AGGTCAGCTGGCT
MoPVvsVIP9.fwd		E6	466	478	+	10.8947	7.59e-05	0.79	GAATTCTTAGACA
snPVvsRandom6.fwd		E6	255	267	+	11.7727	7.84e-05	0.19	AGGTCAGCTGGCT
snPVvsSST5.fwd		E6	354	366	-	10.7857	8.75e-05	0.247	AAAAGGCCAGTGG
MoPVvsVIP14.fwd		E6	251	263	-	10.4211	9.44e-05	1	AGCTGACCTAAGC
MoPVvsEXCrbf4.fwd		E6	256	268	-	11.197	9.8e-05	0.202	GAGCCAGCTGACC
MoPVvsVIP8.fwd		E7	1907	1919	+	16.013	5.36e-07	0.023	TGCAAAAATAGAC
MoPVvsVIPrbf1.fwd		E7	472	484	+	11.6885	9.82e-07	0.0202	ACTTCAAGGAGCT
snPVvsVIP4.fwd		E7	1907	1919	+	14.5278	1.89e-06	0.0811	TGCAAAAATAGAC
MoPVvsEXCrbf8.fwd		E7	2147	2159	-	13.9868	3.18e-06	0.052	AGGCTGCAGCCCT
snPVvsSST2.fwd		E7	1908	1920	+	13.3492	3.2e-06	0.0686	GCAAAAATAGACT
MoPVvsVIPrbf7.fwd		E7	1859	1871	-	13.9868	3.67e-06	0.0608	CTCCTCCTCCTCC
MoPVvsVIPrbf11.fwd		E7	375	387	-	13.4868	3.78e-06	0.159	GGAGAAGATGAGG
MoPVvsVIPrbf2.fwd		E7	1907	1919	+	14.2388	3.78e-06	0.128	TGCAAAAATAGAC
snPVvsRandom2.fwd		E7	1908	1920	+	13.6349	3.85e-06	0.0668	GCAAAAATAGACT
MoPVvsVIP11.fwd		E7	375	387	+	12.9737	4.66e-06	0.199	CCTCATCTTCTCC
snPVvsEXC11.fwd		E7	1286	1298	+	14.9605	4.93e-06	0.16	AGCACATCTGCAG
MoPVvsEXCrbf8.fwd		E7	2148	2160	+	13.8026	4.93e-06	0.052	GGGCTGCAGCCTC
MoPVvsVIPrbf7.fwd		E7	1824	1836	-	13.75	5.43e-06	0.0608	TTCCTCCTCCTCC
snPVvsEXC7.fwd		E7	2147	2159	-	12.3333	5.54e-06	0.0519	AGGCTGCAGCCCT
PfPVvsNEGrbf8.fwd		E7	752	764	-	13.9429	5.62e-06	0.0815	ATGCTTCCTGATT
PfPVvsNEG5.fwd		E7	752	764	+	13.3578	6.22e-06	0.0607	AATCAGGAAGCAT
snPVvsEXC7.fwd		E7	2148	2160	+	12.2879	6.29e-06	0.0519	GGGCTGCAGCCTC
MoPVvsVIP2.fwd		E7	471	483	-	11.5968	6.63e-06	0.105	GCTCCTTGAAGTG
snPVvsKNN2.fwd		E7	1908	1920	-	13.1746	6.71e-06	0.0957	AGTCTATTTTTGC
snPVvsRandom13.fwd		E7	982	994	+	13.5132	7.32e-06	0.309	TAGTCACATGCAC
snPVvsVIP1.fwd		E7	472	484	-	10.5106	7.46e-06	0.158	AGCTCCTTGAAGT
snPVvsEXC3.fwd		E7	1908	1920	+	12.9048	8.36e-06	0.145	GCAAAAATAGACT
MoPVvsVIPrbf7.fwd		E7	1804	1816	-	13.4474	8.38e-06	0.0608	CTCCTCCTCCTCT
MoPVvsVIPrbf2.fwd		E7	445	457	+	13.597	8.97e-06	0.128	TCCTAAAATAGAC
snPVvsVIP4.fwd		E7	445	457	+	13.4028	9.1e-06	0.13	TCCTAAAATAGAC
snPVvsRandom3.fwd		E7	2148	2160	+	11.5393	9.19e-06	0.0955	GGGCTGCAGCCTC
MoPVvsVIP1.fwd		E7	2408	2420	-	11.1639	9.79e-06	0.124	CCAGAAGGAAGCG
PfPVvsNEG9.fwd		E7	1419	1431	-	13.9429	1.06e-05	0.15	CCCCTGACTCTTC
MoPVvsEXC6.fwd		E7	1665	1677	+	13.6974	1.07e-05	0.158	CAAGACCTTGCCT
snPVvsEXC11.fwd		E7	990	1002	+	14.5132	1.1e-05	0.16	TGCACATCTGAAC
PfPVvsNEG6.fwd		E7	2148	2160	-	12.3571	1.11e-05	0.117	GAGGCTGCAGCCC
snPVvsSST2.fwd		E7	446	458	+	12.5556	1.15e-05	0.123	CCTAAAATAGACA
PfPVvsNEGrbf4.fwd		E7	2148	2160	+	12.5303	1.21e-05	0.125	GGGCTGCAGCCTC
MoPVvsEXCrbf7.fwd		E7	2272	2284	+	13.1429	1.31e-05	0.343	ACAAATCAGCAAA
MoPVvsVIPrbf7.fwd		E7	1807	1819	-	13.0921	1.31e-05	0.0608	CCCCTCCTCCTCC
MoPVvsVIPrbf7.fwd		E7	1862	1874	-	13.0921	1.31e-05	0.0608	CCCCTCCTCCTCC
MoPVvsVIPrbf7.fwd		E7	1873	1885	-	13.0921	1.31e-05	0.0608	CCCCTCCTCCTCC
snPVvsRandom2.fwd		E7	446	458	+	12.7619	1.39e-05	0.141	CCTAAAATAGACA
snPVvsKNN2.fwd		E7	446	458	-	12.5556	1.53e-05	0.155	TGTCTATTTTAGG
PfPVvsNEGrbf13.fwd		E7	722	734	-	12.9342	1.54e-05	0.0926	GGAGAGCCAGGGT
snPVvsKNN5.fwd		E7	2147	2159	-	11.8061	1.67e-05	0.114	AGGCTGCAGCCCT
PfPVvsNEGrbf8.fwd		E7	560	572	-	12.9714	1.72e-05	0.118	CCCCTTCCTGGCT
MoPVvsVIPrbf7.fwd		E7	1849	1861	-	12.8553	1.74e-05	0.0608	TCCCTCCTCCTCC
PfPVvsNEGrbf5.fwd		E7	1454	1466	+	12.2571	1.76e-05	0.123	GGTCCTGGGGAGG
MoPVvsEXCrbf6.fwd		E7	1908	1920	-	12.7015	1.79e-05	0.276	AGTCTATTTTTGC
MoPVvsVIPrbf13.fwd		E7	1778	1790	-	13.5395	1.96e-05	0.645	ACTGAAATCAGGT
snPVvsRandom2.fwd		E7	177	189	-	12.4921	1.98e-05	0.141	GTAAAAATAACAC
MoPVvsEXC5.fwd		E7	1908	1920	-	12.6944	2e-05	0.417	AGTCTATTTTTGC
snPVvsVIP5.fwd		E7	2047	2059	+	12.4	2.01e-05	0.104	TCCATCTGCAGTG
snPVvsRandom3.fwd		E7	960	972	+	11.1798	2.07e-05	0.108	CTACTGCAGCTTA
snPVvsKNN5.fwd		E7	2148	2160	+	11.6531	2.19e-05	0.114	GGGCTGCAGCCTC
MoPVvsVIPrbf7.fwd		E7	1838	1850	-	12.5526	2.4e-05	0.0639	CCCCTCCTCCTCT
snPVvsKNN12.fwd		E7	1017	1029	+	12.9868	2.42e-05	0.334	GCTTGACTCAGTC
MoPVvsVIPrbf7.fwd		E7	1821	1833	-	12.5395	2.43e-05	0.0639	CTCCTCCTCCCCT
MoPVvsVIPrbf7.fwd		E7	1846	1858	-	12.5395	2.43e-05	0.0639	CTCCTCCTCCCCT
MoPVvsVIPrbf7.fwd		E7	1870	1882	-	12.5395	2.43e-05	0.0639	CTCCTCCTCCCCT
snPVvsKNN2.fwd		E7	177	189	+	12.1587	2.45e-05	0.155	GTGTTATTTTTAC
MoPVvsVIP12.fwd		E7	180	192	-	12.5714	2.48e-05	0.265	CTGGTAAAAATAA
PfPVvsNEG7.fwd		E7	1908	1920	+	12.625	2.48e-05	0.355	GCAAAAATAGACT
snPVvsVIP9.fwd		E7	121	133	+	12.9737	2.49e-05	0.239	TCTCAGCAAGGGG
snPVvsKNN5.fwd		E7	2048	2060	-	11.5714	2.51e-05	0.116	TCACTGCAGATGG
MoPVvsVIP1.fwd		E7	1164	1176	+	10.9508	2.52e-05	0.132	AGAGAAGGAAGCC
snPVvsKNN9.fwd		E7	982	994	+	12.4	2.53e-05	0.633	TAGTCACATGCAC
snPVvsEXC5.fwd		E7	2273	2285	-	12.541	2.55e-05	0.18	ATTTGCTGATTTG
PfPVvsNEGrbf4.fwd		E7	2147	2159	-	12.0303	2.56e-05	0.16	AGGCTGCAGCCCT
MoPVvsEXCrbf8.fwd		E7	959	971	-	12.75	2.62e-05	0.138	AAGCTGCAGTAGC
PfPVvsNEG6.fwd		E7	1681	1693	-	11.7857	2.63e-05	0.136	TTGCCTGCATCCT
MoPVvsVIPrbf5.fwd		E7	1553	1565	-	12.4085	2.64e-05	0.101	CAGAGGAAGCAAG
snPVvsEXC7.fwd		E7	960	972	+	11.6667	2.64e-05	0.099	CTACTGCAGCTTA
MoPVvsVIPrbf2.fwd		E7	178	190	-	12.4179	2.66e-05	0.209	GGTAAAAATAACA
snPVvsVIP6.fwd		E7	1778	1790	+	12.7286	2.76e-05	0.915	ACCTGATTTCAGT
snPVvsRandom3.fwd		E7	2147	2159	-	11.0112	2.84e-05	0.131	AGGCTGCAGCCCT
PfPVvsNEG6.fwd		E7	2049	2061	-	11.7286	2.85e-05	0.136	CTCACTGCAGATG
MoPVvsVIPrbf5.fwd		E7	1166	1178	+	12.3099	2.9e-05	0.101	AGAAGGAAGCCAG
PfPVvsNEGrbf6.fwd		E7	1419	1431	+	12.5571	2.91e-05	0.414	GAAGAGTCAGGGG
snPVvsSST2.fwd		E7	177	189	-	11.9683	2.93e-05	0.189	GTAAAAATAACAC
snPVvsVIP13.fwd		E7	1722	1734	-	12.3735	3.01e-05	0.552	GGCCTAAAATAAC
snPVvsEXC3.fwd		E7	177	189	-	11.9841	3.05e-05	0.262	GTAAAAATAACAC
MoPVvsVIP12.fwd		E7	460	472	+	12.2078	3.13e-05	0.267	CATCTAAAAATCA
MoPVvsEXC4.fwd		E7	2273	2285	+	12.6515	3.17e-05	0.318	CAAATCAGCAAAT
snPVvsRandom7.fwd		E7	1569	1581	+	11.4925	3.31e-05	0.473	GGTCTAATTTTTG
PfPVvsNEG5.fwd		E7	737	749	+	11.7615	3.31e-05	0.132	GGGCAGGAGGGAC
PfPVvsNEG11.fwd		E7	1455	1467	+	11.8289	3.36e-05	0.282	GTCCTGGGGAGGA
PfPVvsNEGrbf8.fwd		E7	737	749	-	12.2429	3.46e-05	0.136	GTCCCTCCTGCCC
snPVvsVIP3.fwd		E7	1419	1431	+	11.8636	3.47e-05	0.463	GAAGAGTCAGGGG
snPVvsRandom12.fwd		E7	1017	1029	-	12.6579	3.5e-05	0.441	GACTGAGTCAAGC
snPVvsVIP4.fwd		E7	178	190	-	12.1806	3.51e-05	0.255	GGTAAAAATAACA
MoPVvsVIPrbf7.fwd		E7	1459	1471	-	12.1711	3.52e-05	0.0705	TGCCTCCTCCCCA
PfPVvsNEG5.fwd		E7	560	572	+	11.6881	3.53e-05	0.132	AGCCAGGAAGGGG
snPVvsEXC7.fwd		E7	882	894	+	11.4848	3.66e-05	0.116	GACCTGCAGATCC
PfPVvsNEGrbf9.fwd		E7	1908	1920	+	12.25	3.7e-05	0.409	GCAAAAATAGACT
MoPVvsVIP8.fwd		E7	178	190	-	12.3506	3.8e-05	0.233	GGTAAAAATAACA
MoPVvsVIP10.fwd		E7	1162	1174	+	11.7895	3.9e-05	0.192	GGAGAGAAGGAAG
snPVvsVIP1.fwd		E7	729	741	+	9.75177	3.94e-05	0.35	CTCTCCTTGGGCA
PfPVvsNEGrbf4.fwd		E7	959	971	-	11.6818	3.96e-05	0.16	AAGCTGCAGTAGC
MoPVvsVIP13.fwd		E7	2272	2284	+	12.1711	3.98e-05	0.422	ACAAATCAGCAAA
snPVvsKNN5.fwd		E7	960	972	+	11.2653	4e-05	0.151	CTACTGCAGCTTA
snPVvsRandom3.fwd		E7	2220	2232	+	10.8202	4.03e-05	0.158	cctctgcagtatc
MoPVvsVIP10.fwd		E7	901	913	+	11.7632	4.08e-05	0.192	GAGGAGAAGCCAC
MoPVvsVIP10.fwd		E7	1546	1558	-	11.75	4.14e-05	0.192	AGCAAGAAGGCAG
MoPVvsVIP15.fwd		E7	1778	1790	-	11.9634	4.22e-05	0.911	ACTGAAATCAGGT
PfPVvsNEG6.fwd		E7	959	971	+	11.3429	4.63e-05	0.162	GCTACTGCAGCTT
MoPVvsVIP10.fwd		E7	2112	2124	-	11.6316	4.87e-05	0.203	TGCAAGAAGGAAT
MoPVvsEXCrbf8.fwd		E7	960	972	+	12.1711	4.92e-05	0.164	CTACTGCAGCTTA
snPVvsRandom3.fwd		E7	2048	2060	-	10.6966	4.93e-05	0.158	TCACTGCAGATGG
snPVvsEXC7.fwd		E7	2220	2232	+	11.303	4.93e-05	0.136	cctctgcagtatc
snPVvsEXC7.fwd		E7	2048	2060	-	11.303	4.93e-05	0.136	TCACTGCAGATGG
MoPVvsVIPrbf12.fwd		E7	2272	2284	+	11.4737	4.94e-05	0.346	ACAAATCAGCAAA
MoPVvsVIPrbf7.fwd		E7	2055	2067	-	11.7895	4.95e-05	0.0831	TTGCTCCTCACTG
snPVvsVIP10.fwd		E7	1287	1299	+	11.4474	4.97e-05	0.248	GCACATCTGCAGT
MoPVvsVIPrbf5.fwd		E7	1829	1841	+	11.7042	5e-05	0.121	aggaggaagagag
snPVvsKNN5.fwd		E7	2219	2231	-	11.102	5.04e-05	0.161	ATACTGCAGAGGT
PfPVvsNEGrbf11.fwd		E7	728	740	+	11.9737	5.05e-05	0.289	GCTCTCCTTGGGC
MoPVvsVIPrbf7.fwd		E7	1856	1868	-	11.7368	5.16e-05	0.0834	CTCCTCCTCCCTC
PfPVvsNEG6.fwd		E7	1290	1302	-	11.2429	5.22e-05	0.169	GATACTGCAGATG
MoPVvsVIPrbf5.fwd		E7	1184	1196	+	11.6197	5.34e-05	0.121	GTAAGGAAGGGGC
PfPVvsNEGrbf4.fwd		E7	881	893	-	11.4091	5.5e-05	0.16	GATCTGCAGGTCT
MoPVvsEXC5.fwd		E7	177	189	+	11.625	5.58e-05	0.417	GTGTTATTTTTAC
snPVvsKNN13.fwd		E7	1926	1938	-	11.3553	5.65e-05	0.289	AGTTGGGGCAGAA
snPVvsVIP10.fwd		E7	1436	1448	-	11.1579	5.71e-05	0.248	GGACAGATGCTGT
snPVvsKNN5.fwd		E7	882	894	+	11	5.76e-05	0.161	GACCTGCAGATCC
snPVvsVIP5.fwd		E7	958	970	+	11.3714	5.8e-05	0.149	TGCTACTGCAGCT
PfPVvsNEG11.fwd		E7	1956	1968	-	11.3289	5.87e-05	0.305	TCCTTGGGGAGAA
MoPVvsVIPrbf2.fwd		E7	1721	1733	-	11.4328	5.88e-05	0.279	GCCTAAAATAACT
MoPVvsVIP13.fwd		E7	2320	2332	+	11.4474	5.94e-05	0.422	CGGAGACAGCACC
PfPVvsNEGrbf4.fwd		E7	2049	2061	+	11.3333	5.96e-05	0.16	CATCTGCAGTGAG
snPVvsRandom12.fwd		E7	1418	1430	+	11.5789	5.97e-05	0.507	GGAAGAGTCAGGG
PfPVvsNEGrbf4.fwd		E7	1681	1693	+	11.303	6.15e-05	0.16	AGGATGCAGGCAA
snPVvsKNN12.fwd		E7	1418	1430	-	11.5921	6.16e-05	0.638	CCCTGACTCTTCC
snPVvsEXC7.fwd		E7	1289	1301	-	11.1364	6.33e-05	0.154	ATACTGCAGATGT
snPVvsEXC3.fwd		E7	446	458	+	11.3016	6.43e-05	0.393	CCTAAAATAGACA
MoPVvsVIPrbf12.fwd		E7	2320	2332	+	11.0526	6.43e-05	0.346	CGGAGACAGCACC
MoPVvsEXCrbf8.fwd		E7	882	894	+	11.8684	6.45e-05	0.164	GACCTGCAGATCC
PfPVvsNEGrbf11.fwd		E7	473	485	-	11.5789	6.5e-05	0.289	AAGCTCCTTGAAG
snPVvsEXC8.fwd		E7	1926	1938	-	10.8	6.51e-05	0.251	AGTTGGGGCAGAA
PfPVvsNEG5.fwd		E7	1554	1566	-	11.0183	6.53e-05	0.171	ACAGAGGAAGCAA
snPVvsKNN5.fwd		E7	1289	1301	-	10.898	6.53e-05	0.165	ATACTGCAGATGT
snPVvsKNN4.fwd		E7	1286	1298	+	11.9672	6.56e-05	0.212	AGCACATCTGCAG
MoPVvsVIPrbf8.fwd		E7	2335	2347	-	11.6842	6.71e-05	0.683	GGCACTGTAACGT
PfPVvsNEGrbf8.fwd		E7	1916	1928	+	11.3857	6.79e-05	0.2	AGACTTCCTGTTC
snPVvsKNN5.fwd		E7	874	886	+	10.8571	6.86e-05	0.165	ACAGTGCAGACCT
snPVvsSST5.fwd		E7	1727	1739	+	11	7.01e-05	0.247	TTTAGGCCAAAGA
PfPVvsNEG13.fwd		E7	728	740	-	11.4079	7.12e-05	0.359	GCCCAAGGAGAGC
PfPVvsNEGrbf1.fwd		E7	1777	1789	+	10.9839	7.17e-05	1	AACCTGATTTCAG
PfPVvsNEG8.fwd		E7	2273	2285	-	11.4429	7.19e-05	0.274	ATTTGCTGATTTG
MoPVvsEXCrbf6.fwd		E7	177	189	+	11.2687	7.27e-05	0.413	GTGTTATTTTTAC
snPVvsSST2.fwd		E7	1720	1732	-	11.1429	7.32e-05	0.323	CCTAAAATAACTT
snPVvsVIP8.fwd		E7	2335	2347	-	11.8289	7.35e-05	0.788	GGCACTGTAACGT
MoPVvsEXCrbf8.fwd		E7	1289	1301	-	11.6974	7.4e-05	0.164	ATACTGCAGATGT
PfPVvsNEG6.fwd		E7	881	893	+	10.9286	7.46e-05	0.185	AGACCTGCAGATC
snPVvsKNN8.fwd		E7	496	508	-	11.6286	7.79e-05	0.463	TGCAATTTAGGCC
PfPVvsNEG6.fwd		E7	2147	2159	+	10.8714	7.92e-05	0.185	AGGGCTGCAGCCT
MoPVvsEXCrbf8.fwd		E7	2220	2232	+	11.5921	7.99e-05	0.168	cctctgcagtatc
snPVvsKNN7.fwd		E7	1569	1581	+	10.791	8.01e-05	0.859	GGTCTAATTTTTG
PfPVvsNEG5.fwd		E7	1460	1472	+	10.7798	8.07e-05	0.176	GGGGAGGAGGCAC
PfPVvsNEG7.fwd		E7	177	189	-	11.2639	8.09e-05	0.432	GTAAAAATAACAC
MoPVvsVIPrbf10.fwd		E7	120	132	+	11.2368	8.15e-05	0.344	TTCTCAGCAAGGG
snPVvsRandom11.fwd		E7	941	953	+	12.1053	8.16e-05	0.816	TTGGCAATTTGCG
PfPVvsNEGrbf9.fwd		E7	177	189	-	11.2361	8.2e-05	0.409	GTAAAAATAACAC
snPVvsVIP5.fwd		E7	961	973	-	10.9571	8.24e-05	0.19	CTAAGCTGCAGTA
MoPVvsVIPrbf7.fwd		E7	801	813	+	11.1316	8.25e-05	0.104	ATCCTCCTCTTGG
snPVvsRandom14.fwd		E7	1926	1938	-	10.7763	8.28e-05	0.351	AGTTGGGGCAGAA
MoPVvsVIPrbf5.fwd		E7	2406	2418	-	11.0282	8.28e-05	0.143	AGAAGGAAGCGGT
snPVvsEXC7.fwd		E7	2219	2231	-	10.9091	8.54e-05	0.185	ATACTGCAGAGGT
PfPVvsNEGrbf4.fwd		E7	2219	2231	-	10.9697	8.58e-05	0.187	ATACTGCAGAGGT
MoPVvsVIP6.fwd		E7	2335	2347	-	11.3857	8.72e-05	0.709	GGCACTGTAACGT
PfPVvsNEG10.fwd		E7	1453	1465	+	11.5395	8.79e-05	0.145	TGGTCCTGGGGAG
MoPVvsEXCrbf8.fwd		E7	1290	1302	+	11.4474	8.83e-05	0.168	CATCTGCAGTATC
snPVvsVIP13.fwd		E7	444	456	+	11	9.03e-05	0.552	TTCCTAAAATAGA
PfPVvsNEG7.fwd		E7	446	458	+	11.1111	9.06e-05	0.432	CCTAAAATAGACA
MoPVvsEXC3.fwd		E7	1287	1299	-	10.7424	9.14e-05	0.207	ACTGCAGATGTGC
MoPVvsVIPrbf5.fwd		E7	488	500	+	10.8873	9.17e-05	0.143	TGGAGGAAGGCCT
MoPVvsVIPrbf5.fwd		E7	753	765	+	10.8873	9.17e-05	0.143	ATCAGGAAGCATC
MoPVvsEXCrbf8.fwd		E7	2219	2231	-	11.3947	9.18e-05	0.168	ATACTGCAGAGGT
snPVvsRandom2.fwd		E7	1720	1732	-	10.9683	9.4e-05	0.335	CCTAAAATAACTT
PfPVvsNEG2.fwd		E7	2272	2284	+	10.6364	9.49e-05	1	ACAAATCAGCAAA
snPVvsRandom5.fwd		E7	2273	2285	-	10.7742	9.51e-05	0.349	ATTTGCTGATTTG
snPVvsRandom11.fwd		E7	498	510	-	11.6316	9.51e-05	0.816	GTTGCAATTTAGG
MoPVvsVIP8.fwd		E7	445	457	+	10.9221	9.54e-05	0.385	TCCTAAAATAGAC
MoPVvsEXC1.fwd		E7	1311	1323	+	10.1789	9.62e-05	0.677	TGGTGACCTCTGT
snPVvsKNN11.fwd		E7	765	777	+	10.6316	9.65e-05	0.518	CAACCTCAGCATG
MoPVvsVIPrbf5.fwd		E7	561	573	+	10.8028	9.68e-05	0.143	GCCAGGAAGGGGA
PfPVvsNEGrbf13.fwd		E7	2376	2388	+	10.6974	9.81e-05	0.167	TCACAGCCTGGAT
snPVvsVIP5.fwd		E7	2221	2233	-	10.7286	9.89e-05	0.207	GGATACTGCAGAG
MoPVvsVIP13.fwd		E7	749	761	+	10.4079	9.89e-05	0.528	CAGAATCAGGAAG
snPVvsVIP4.fwd		E7	1721	1733	-	10.9306	9.91e-05	0.386	GCCTAAAATAACT
MoPVvsVIP6.fwd		E7	86	98	+	11.2286	9.91e-05	0.709	ATTGCTGTAATAA
snPVvsVIP5.fwd		E7	2149	2161	-	10.7143	9.98e-05	0.207	TGAGGCTGCAGCC
snPVvsVIP9.fwd		E8	181	193	-	15.0263	3.5e-07	0.0147	CTGCTGCAAGAAC
snPVvsVIP5.fwd		E8	915	927	+	14.2143	9.77e-07	0.0405	GCTTCCTGCAGCC
PfPVvsNEG6.fwd		E8	916	928	+	13.1857	2.26e-06	0.0952	CTTCCTGCAGCCT
PfPVvsNEGrbf4.fwd		E8	916	928	-	13.3636	2.34e-06	0.0972	AGGCTGCAGGAAG
PfPVvsNEGrbf7.fwd		E8	1383	1395	+	13.3	5.75e-06	0.0615	TGCTGCTGAGAGC
PfPVvsNEG5.fwd		E8	913	925	-	13.2752	7.06e-06	0.0607	CTGCAGGAAGCTG
PfPVvsNEGrbf8.fwd		E8	913	925	+	13.5286	9.37e-06	0.0815	CAGCTTCCTGCAG
snPVvsKNN5.fwd		E8	141	153	-	12.0816	9.69e-06	0.114	ACACTGCAGAACT
snPVvsVIP5.fwd		E8	371	383	+	12.9	1.06e-05	0.0829	AGCTGCTGCAGTA
snPVvsEXC7.fwd		E8	141	153	-	12.0455	1.17e-05	0.0742	ACACTGCAGAACT
snPVvsEXC7.fwd		E8	372	384	-	12.0152	1.26e-05	0.0742	ATACTGCAGCAGC
snPVvsRandom3.fwd		E8	372	384	-	11.3933	1.32e-05	0.106	ATACTGCAGCAGC
MoPVvsEXCrbf1.fwd		E8	540	552	-	11.1531	1.33e-05	0.187	CGCTGCCCTTGTC
snPVvsKNN8.fwd		E8	689	701	+	12.9714	1.41e-05	0.303	TTCAATTTAGGAT
snPVvsEXC11.fwd		E8	1328	1340	+	14.25	1.5e-05	0.16	ATCACATCTGGAG
snPVvsSST1.fwd		E8	540	552	-	11.4483	1.55e-05	0.218	CGCTGCCCTTGTC
snPVvsEXC8.fwd		E8	314	326	-	12.0857	1.59e-05	0.251	CATTGGGTCAGGA
MoPVvsVIPrbf5.fwd		E8	1341	1353	+	12.7746	1.72e-05	0.101	TGAAGGAAGGGGC
MoPVvsVIP4.fwd		E8	1383	1395	+	12.6857	1.91e-05	0.189	TGCTGCTGAGAGC
MoPVvsVIP8.fwd		E8	1187	1199	+	13.1818	1.97e-05	0.233	CCCAGAAATAGGT
snPVvsKNN13.fwd		E8	314	326	-	13	2.14e-05	0.289	CATTGGGTCAGGA
snPVvsKNN5.fwd		E8	372	384	-	11.6531	2.19e-05	0.114	ATACTGCAGCAGC
MoPVvsVIPrbf9.fwd		E8	1574	1586	+	12.1711	2.22e-05	0.408	AATTGAGACTGTG
snPVvsVIP5.fwd		E8	488	500	-	12.2429	2.42e-05	0.112	GTCTGCTGCACTG
snPVvsEXC1.fwd		E8	540	552	-	11.6429	2.49e-05	0.35	CGCTGCCCTTGTC
MoPVvsEXC1.fwd		E8	540	552	-	10.7642	2.88e-05	0.305	CGCTGCCCTTGTC
snPVvsKNN2.fwd		E8	1188	1200	-	12.0159	2.89e-05	0.155	GACCTATTTCTGG
PfPVvsNEGrbf3.fwd		E8	540	552	-	12.2727	2.99e-05	0.349	CGCTGCCCTTGTC
PfPVvsNEG11.fwd		E8	1036	1048	+	11.9079	3.05e-05	0.282	GTGCTGGGGAGCT
snPVvsRandom2.fwd		E8	1188	1200	+	12.0952	3.12e-05	0.167	CCAGAAATAGGTC
snPVvsKNN1.fwd		E8	540	552	-	11.8033	3.17e-05	0.275	CGCTGCCCTTGTC
MoPVvsVIP1.fwd		E8	1339	1351	+	10.8852	3.22e-05	0.134	AGTGAAGGAAGGG
snPVvsKNN5.fwd		E8	917	929	+	11.398	3.29e-05	0.137	TTCCTGCAGCCTC
snPVvsEXC7.fwd		E8	917	929	+	11.5303	3.38e-05	0.116	TTCCTGCAGCCTC
snPVvsRandom14.fwd		E8	314	326	-	12.4211	3.64e-05	0.269	CATTGGGTCAGGA
PfPVvsNEG5.fwd		E8	309	321	-	11.5963	3.82e-05	0.132	GGTCAGGAGGGGC
snPVvsRandom1.fwd		E8	540	552	-	11.7049	3.88e-05	0.276	CGCTGCCCTTGTC
snPVvsVIP5.fwd		E8	1085	1097	-	11.7714	3.99e-05	0.138	GCTTGCTGCTGCC
PfPVvsNEG8.fwd		E8	1383	1395	+	12.1	4e-05	0.259	TGCTGCTGAGAGC
snPVvsSST4.fwd		E8	1051	1063	-	10.9545	4.03e-05	0.443	TGATGACATCGTG
MoPVvsVIP14.fwd		E8	1001	1013	+	12.1579	4.19e-05	1	ACTTGACCTAGAC
snPVvsKNN6.fwd		E8	1383	1395	-	12.197	4.31e-05	0.232	GCTCTCAGCAGCA
MoPVvsEXC3.fwd		E8	370	382	-	11.7879	4.37e-05	0.183	ACTGCAGCAGCTC
MoPVvsEXCrbf8.fwd		E8	559	571	-	12.2632	4.49e-05	0.164	TTACTGCAGTTCG
MoPVvsVIPrbf2.fwd		E8	1187	1199	+	11.7761	4.56e-05	0.244	CCCAGAAATAGGT
PfPVvsNEGrbf8.fwd		E8	309	321	+	11.9143	4.57e-05	0.145	GCCCCTCCTGACC
PfPVvsNEGrbf13.fwd		E8	1102	1114	-	11.6974	4.68e-05	0.142	TCTCAGCCTGCCC
MoPVvsVIPrbf10.fwd		E8	1382	1394	-	12.4079	4.68e-05	0.302	CTCTCAGCAGCAT
MoPVvsEXC3.fwd		E8	102	114	-	11.6667	4.77e-05	0.183	GCCGCAGCGGTGT
MoPVvsEXCrbf5.fwd		E8	1383	1395	+	12.3636	4.79e-05	0.336	TGCTGCTGAGAGC
PfPVvsNEG1.fwd		E8	540	552	-	11.7424	4.92e-05	0.476	CGCTGCCCTTGTC
MoPVvsVIPrbf5.fwd		E8	912	924	-	11.662	5.16e-05	0.121	TGCAGGAAGCTGA
snPVvsRandom3.fwd		E8	917	929	+	10.6629	5.2e-05	0.158	TTCCTGCAGCCTC
snPVvsSST2.fwd		E8	1188	1200	+	11.4762	5.3e-05	0.284	CCAGAAATAGGTC
PfPVvsNEGrbf9.fwd		E8	1188	1200	+	11.7917	5.4e-05	0.409	CCAGAAATAGGTC
snPVvsVIP10.fwd		E8	102	114	+	11.2237	5.53e-05	0.248	ACACCGCTGCGGC
PfPVvsNEGrbf12.fwd		E8	907	919	-	11.4868	5.7e-05	0.185	GAAGCTGAGCTTT
snPVvsEXC7.fwd		E8	559	571	-	11.197	5.79e-05	0.149	TTACTGCAGTTCG
MoPVvsVIP7.fwd		E8	1574	1586	+	11.0658	5.79e-05	0.469	AATTGAGACTGTG
snPVvsKNN5.fwd		E8	487	499	+	10.9898	5.83e-05	0.161	ACAGTGCAGCAGA
MoPVvsEXCrbf8.fwd		E8	141	153	-	11.9605	5.94e-05	0.164	ACACTGCAGAACT
snPVvsVIP5.fwd		E8	374	386	-	11.3143	6.1e-05	0.149	GCATACTGCAGCA
snPVvsRandom3.fwd		E8	487	499	+	10.5506	6.13e-05	0.158	ACAGTGCAGCAGA
snPVvsRandom3.fwd		E8	141	153	-	10.5393	6.23e-05	0.158	ACACTGCAGAACT
snPVvsVIP4.fwd		E8	1187	1199	+	11.5139	6.39e-05	0.278	CCCAGAAATAGGT
PfPVvsNEG6.fwd		E8	142	154	-	11.0429	6.58e-05	0.173	CACACTGCAGAAC
PfPVvsNEGrbf13.fwd		E8	275	287	-	11.25	6.59e-05	0.147	GCTGAGCCCTGGT
snPVvsVIP9.fwd		E8	1062	1074	+	11.8158	6.67e-05	0.376	CACCAGCAAGAGT
MoPVvsEXCrbf8.fwd		E8	372	384	-	11.8289	6.67e-05	0.164	ATACTGCAGCAGC
snPVvsRandom3.fwd		E8	142	154	+	10.4831	6.76e-05	0.158	GTTCTGCAGTGTG
PfPVvsNEG7.fwd		E8	1188	1200	+	11.4861	6.78e-05	0.432	CCAGAAATAGGTC
snPVvsRandom5.fwd		E8	1383	1395	+	11.2016	6.81e-05	0.349	TGCTGCTGAGAGC
snPVvsRandom3.fwd		E8	559	571	-	10.4382	7.21e-05	0.158	TTACTGCAGTTCG
MoPVvsEXCrbf6.fwd		E8	1188	1200	-	11.194	7.7e-05	0.413	GACCTATTTCTGG
MoPVvsEXCrbf5.fwd		E8	758	770	+	11.6364	7.92e-05	0.336	GCATGCTGACAGA
snPVvsKNN6.fwd		E8	758	770	-	11.4697	8.08e-05	0.285	TCTGTCAGCATGC
snPVvsKNN4.fwd		E8	1328	1340	+	11.623	8.08e-05	0.217	ATCACATCTGGAG
MoPVvsEXC4.fwd		E8	1383	1395	-	11.6364	8.31e-05	0.318	GCTCTCAGCAGCA
MoPVvsEXCrbf8.fwd		E8	373	385	+	11.5263	8.38e-05	0.168	CTGCTGCAGTATG
PfPVvsNEG6.fwd		E8	373	385	-	10.8143	8.42e-05	0.187	CATACTGCAGCAG
snPVvsVIP2.fwd		E8	540	552	-	11.1364	8.61e-05	0.518	CGCTGCCCTTGTC
MoPVvsVIPrbf7.fwd		E8	224	236	+	11.0658	8.67e-05	0.104	GTTCTCCTCTGGT
MoPVvsVIPrbf6.fwd		E8	1001	1013	+	11.4571	8.74e-05	0.933	ACTTGACCTAGAC
snPVvsEXC5.fwd		E8	1383	1395	+	11.4754	9.04e-05	0.318	TGCTGCTGAGAGC
MoPVvsVIPrbf1.fwd		E8	949	961	+	9.95082	9.08e-05	0.339	ATCTGAAGAAACA
MoPVvsEXCrbf7.fwd		E8	1615	1627	-	11.2429	9.28e-05	0.569	GAACATCAGGAGT
MoPVvsVIPrbf7.fwd		E8	310	322	+	10.8816	9.84e-05	0.112	CCCCTCCTGACCC
snPVvsEXC3.fwd		E8	1188	1200	+	10.8571	9.85e-05	0.469	CCAGAAATAGGTC
MoPVvsVIP9.fwd		E9	230	242	+	12.6316	8.62e-06	0.184	CTTTTCTTAGCTA
MoPVvsVIPrbf7.fwd		E9	276	288	-	13.0658	1.36e-05	0.0608	CATCTCCTCACCC
MoPVvsVIPrbf9.fwd		E9	24	36	-	12.2763	1.85e-05	0.408	TTTTAAGACTGTA
MoPVvsVIP8.fwd		E9	180	192	+	13.0649	2.2e-05	0.233	GACAGAAATAGAG
MoPVvsVIPrbf3.fwd		E9	230	242	-	11.7143	2.69e-05	0.569	TAGCTAAGAAAAG
MoPVvsVIP12.fwd		E9	207	219	+	11.6494	4.56e-05	0.325	TACTTAAAAATAA
MoPVvsVIP7.fwd		E9	24	36	-	11.2105	4.73e-05	0.469	TTTTAAGACTGTA
snPVvsVIP4.fwd		E9	209	221	+	11.5	6.48e-05	0.278	CTTAAAAATAATC
MoPVvsVIP11.fwd		E9	95	107	-	11.4211	6.9e-05	0.437	TGTCATCTTGTGC
snPVvsRandom3.fwd		E9	428	440	-	10.4607	6.98e-05	0.158	ATACTGCAGTAGC
MoPVvsEXCrbf8.fwd		E9	428	440	-	11.7632	7.03e-05	0.164	ATACTGCAGTAGC
snPVvsEXC7.fwd		E9	428	440	-	11.0152	7.47e-05	0.171	ATACTGCAGTAGC
snPVvsSST2.fwd		E9	181	193	+	11.1111	7.54e-05	0.323	ACAGAAATAGAGA
snPVvsRandom2.fwd		E9	181	193	+	11.0317	8.83e-05	0.335	ACAGAAATAGAGA
MoPVvsVIPrbf2.fwd		E9	209	221	+	10.7761	9.47e-05	0.405	CTTAAAAATAATC
# FIMO (Find Individual Motif Occurrences): Version 5.4.1 compiled on Aug 25 2021 at 17:37:39
# The format of this file is described at https://meme-suite.org/meme/doc/fimo-output-format.html.
# fimo --oc . --verbosity 1 --thresh 1.0E-4 pwm_allModels_crop13_seqlets100.txt Scn1aEnh_all.fa
