# Supplementary material for: Machine learning sequence prioritization for cell type-specific enhancer design
Source: eLife. 2022 May 16;11:e69571. doi: 10.7554/eLife.69571 (PMC9110026; doi:10.7554/eLife.69571)
Supplement: Figure 2—source data 1. — Genomic coordinates, peak log2 fold difference, adjusted p-value, support vector machine (SVM) scores, convolutional neural network (CNN) scores, snATAC-seq overlap, species conservation, and subcortical SVM scores are provided. [file elife-69571-fig2-data1.xlsx]

## Sheet: Sheet1
bed				Peak Stats		PV SVM scores												PV CNN scores				Mouse snATAC-seq							Conservation					Subcortical PV
chr	start	end	TestRegion	LFC_PfPVvsPVneg_cSNAIL	padj_PfPVvsPVneg_cSNAIL	SVMscore_PfPVvsNEG	SVMscore_PfPVvsNEGrbf	SVMscore_snPVvsNEG	SVMscore_snPVvsKNN	SVMscore_MoPVvsEXC	SVMscore_MoPVvsEXCrbf	SVMscore_snPVvsEXC	SVMscore_MoPVvsVIP	SVMscore_MoPVvsVIPrbf	SVMscore_snPVvsVIP	SVMscore_snPVvsSST	Average_allSVMs	CNN_bin	CNNscore_PVvsNEG	CNNscore_PVvsEXC	CNNscore_PVvsVIP	OverlapsnATACPV_mouse	diffPeak_snPVvsNEG_mouse	diffPeak_snPVvsKNN_mouse	diffPeak_snPVvsEXC_mouse	diffPeak_snPVvsVIP_mouse	diffPeak_snPVvsSST_mouse	diffPeak_snALL_mouse	MappableToHg38_liftover	OverlapsHumanPVpeak	nearestGene_mm10	nearestGene_Hg38	AvgPhyloP_60wayEuarchontoglires	Overlaps striatum PV peak	SVMscore_STRPVvsNEG	Overlaps GPe PV peak	SVMscore_GPEPVvsNEG
chr1	4455984	4456484	mm10_chr1.4455984.4456484	1.78324	0.00274835	0.780891	1.04152	1.34795	1.21533	0.994725	1.31666	0.481169	1.45573	0.537636	0.879248	0.977906	1.00262	MM10000000010768320	0.953376	NA	0.99752	yes	yes	yes	yes	yes	yes	yes	yes	no	Sox17 (+40179)	SOX17 (+30774)	0.083914	no	0.26802	no	0.469472
chr1	10504587	10505087	mm10_chr1.10504587.10505087	2.49263	9.43e-07	1.04678	1.83099	1.41857	2.57808	2.10108	1.98225	2.44552	2.30776	0.67547	1.56459	0.901935	1.71391	MM10000000010798563	0.865912	NA	NA	yes	yes	yes	yes	yes	yes	yes	yes	no	Cpa6 (+215108)	ARFGEF1 (-188259)	0.273396	no	0.239124	no	2.32652
chr1	12319932	12320432	mm10_chr1.12319932.12320432	1.92163	0.00441064	0.719227	1.15698	0.982751	0.887301	1.12251	0.965519	1.65595	1.92823	0.468324	1.07927	0.897594	1.07851	MM10000000010807639	0.659859	NA	NA	yes	yes	yes	yes	yes	yes	yes	yes	no	Sulf1 (-372095)	SULF1 (-328941)	0.255288	yes	0.10585	yes	0.996186
chr1	13205117	13205617	mm10_chr1.13205117.13205617	1.52031	0.00645922	2.35621	2.80589	1.50957	2.6644	2.79212	2.62177	1.98907	0.48389	1.60908	2.24044	1.2053	2.02525	MM10000000010812065	0.988303	NA	0.999205	yes	yes	yes	yes	yes	no	no	yes	no	Prdm14 (-78204)	PRDM14 (-118616)	0.420152	yes	0.988989	yes	0.78067
chr1	15408961	15409461	mm10_chr1.15408961.15409461	2.28389	2.48e-10	1.30084	0.977266	1.21753	0.649742	0.66049	1.73515	1.62945	0.147942	0.947994	0.791356	1.22309	1.02553	MM10000000010823085	0.784661	NA	NA	yes	yes	yes	yes	yes	yes	yes	yes	no	Kcnb2 (+96759)	KCNB2 (+124269)	0.180428	yes	0.0100277	yes	0.454655
chr1	15444427	15444927	mm10_chr1.15444427.15444927	2.06018	1.72e-07	0.668871	1.10894	0.515144	0.584821	0.34254	1.49251	1.06374	0.495258	0.38505	0.920081	0.235461	0.71022	MM10000000010823262	0.959411	NA	NA	yes	yes	yes	yes	yes	yes	yes	yes	no	Kcnb2 (+132225)	KCNB2 (+159674)	0.113614	no	0.0564612	no	0.6934
chr1	15444813	15445313	mm10_chr1.15444813.15445313	2.06018	1.72e-07	0.193052	1.52256	0.71972	0.937672	0.950386	1.34918	0.440138	1.839	0.126041	1.10838	0.374051	0.869107	MM10000000010823264	0.810569	NA	NA	no	yes	yes	yes	yes	yes	yes	yes	no	Kcnb2 (+132611)	KCNB2 (+159949)	0.095062	no	-0.118945	no	0.297835
chr1	16699850	16700350	mm10_chr1.16699850.16700350	2.39998	8.08e-08	1.04157	2.16649	1.11186	0.401743	0.901548	1.01629	1.88747	2.43021	0.266767	1.72525	0.924796	1.26127	MM10000000010829539	0.959452	NA	NA	no	yes	yes	yes	yes	yes	yes	yes	no	Ly96 (+11667)	LY96 (+18117)	0.075878	no	-0.302519	no	0.63427
chr1	17997243	17997743	mm10_chr1.17997243.17997743	2.04395	6.63e-06	1.52849	2.50466	1.38116	1.69674	2.03711	2.45626	1.88169	2.04028	0.94963	1.81909	0.939585	1.74861	MM10000000010836026	0.971938	NA	0.995201	yes	yes	yes	yes	yes	yes	yes	yes	no	Crisp4 (+148409)	BDH2 (-7557)	0.0489444	no	-0.125658	no	0.517451
chr1	19384826	19385326	mm10_chr1.19384826.19385326	2.61566	1.42e-07	1.49449	0.686408	0.746898	0.70704	0.826782	0.408903	1.81873	0.503054	1.21396	0.717311	0.50617	0.875431	MM10000000010842964	0.896003	NA	0.985629	yes	yes	yes	yes	yes	yes	yes	yes	no	Tfap2b (+176162)	TFAP2B (+154977)	0.548582	no	0.91955	no	0.511671
chr1	20328698	20329198	mm10_chr1.20328698.20329198	1.91352	0.000114909	0.750202	3.31425	0.345916	1.53433	1.33587	2.97813	0.335195	3.49599	0.587057	2.3811	0.206609	1.56951	MM10000000010847683	0.998956	NA	NA	yes	yes	yes	yes	yes	yes	yes	yes	no	Pkhd1 (+289116)	PKHD1 (+227110)	0.783166	no	0.0564212	no	0.534063
chr1	20454593	20455093	mm10_chr1.20454593.20455093	3.03704	1.23e-22	1.21348	1.79319	2.94291	0.945129	0.977174	0.7759	3.14659	0.405483	0.973125	1.38595	2.07534	1.51221	MM10000000010848313	0.962534	NA	0.997661	yes	yes	yes	yes	yes	no	no	yes	no	Pkhd1 (+163221)	PKHD1 (+123408)	0.421022	no	0.0699975	no	1.16836
chr1	20463218	20463718	mm10_chr1.20463218.20463718	1.87301	0.00995865	0.625494	0.589679	0.676987	1.23222	1.35149	1.01278	1.10837	1.76259	0.259524	0.593903	0.593706	0.891522	MM10000000010848356	0.821488	0.99403	0.98997	yes	yes	yes	yes	yes	yes	yes	yes	no	Pkhd1 (+154596)	PKHD1 (+112504)	0.106354	no	-0.0679071	no	1.43166
chr1	20930305	20930805	mm10_chr1.20930305.20930805	1.84792	0.00808279	0.355312	1.77085	0.856766	1.62251	1.50391	1.67666	1.21194	1.43958	0.159388	1.31541	0.660188	1.14296	MM10000000010850691	0.989678	NA	NA	yes	yes	yes	yes	yes	no	no	no	NA	Efhc1 (-21133)	NA	-0.0429143	no	-0.295431	no	0.199506
chr1	21614581	21615081	mm10_chr1.21614581.21615081	2.31467	0.000397734	1.0855	0.633597	1.10685	0.272834	0.78137	0.555137	1.05676	0.566002	0.407194	0.530653	0.76283	0.705339	MM10000000010854113	0.998043	NA	NA	yes	yes	yes	yes	yes	yes	yes	yes	no	Khdc1b (+231275)	KHDC1 (+341830)	0.0620761	no	0.0840681	no	1.30283
chr1	23204422	23204922	mm10_chr1.23204422.23204922	3.21515	1.51e-18	0.344452	1.57469	0.842128	2.58456	2.50774	2.47237	1.25831	2.59626	0.118485	1.23605	0.67239	1.4734	MM10000000010862062	0.998397	NA	NA	yes	yes	yes	yes	yes	yes	yes	yes	no	4933415F23Rik (-102419)	OGFRL1 (+188307)	0.1558	no	0.0214943	no	0.529398
chr1	23332138	23332638	mm10_chr1.23332138.23332638	2.53656	1.9e-05	1.93499	2.27071	2.15743	1.6064	1.83072	1.85504	2.97987	2.03884	1.49732	1.78019	1.60476	1.95966	MM10000000010862700	0.911829	NA	NA	yes	yes	yes	yes	yes	yes	yes	yes	no	Ogfrl1 (+50787)	OGFRL1 (+54328)	0.202486	yes	0.941849	no	0.656998
chr1	26702900	26703400	mm10_chr1.26702900.26703400	1.73592	0.0051024	0.601464	0.932132	2.49136	1.31703	1.20437	1.61198	3.13707	1.73415	0.493979	0.842725	1.81072	1.47063	MM10000000010879554	0.806125	NA	0.998962	yes	yes	yes	yes	yes	yes	yes	no	NA	4931408C20Rik (-15690)	NA	0	no	-0.195567	no	1.00841
chr1	27625240	27625740	mm10_chr1.27625240.27625740	3.41614	1.45e-20	0.993973	1.26408	0.948579	0.985361	0.861566	0.817265	1.72547	0.68151	0.750978	1.06588	0.989814	1.00768	MM10000000010884166	0.751873	NA	0.99386	yes	yes	yes	yes	yes	yes	yes	yes	no	4931408C20Rik (-938030)	NONE	0.230476	yes	0.334575	no	0.876866
chr1	28898830	28899330	mm10_chr1.28898830.28899330	3.26285	4.45e-13	1.26291	3.03125	1.14079	2.77751	3.22096	3.24654	1.83065	0.87548	0.883365	2.29711	0.791038	1.9416	MM10000000010890534	0.995662	NA	NA	yes	yes	yes	yes	yes	yes	yes	yes	no	Gm597 (-118828)	EYS (+167995)	0.110557	yes	0.237488	no	1.14961
chr1	29099177	29099677	mm10_chr1.29099177.29099677	2.27794	4.66e-08	1.21058	2.57302	0.756767	3.10977	3.306	2.80762	1.7094	0.67724	0.958517	2.08218	0.56019	1.79557	MM10000000010891536	0.99893	NA	NA	yes	yes	yes	yes	yes	yes	yes	yes	no	Gm597 (-319175)	EYS (+411135)	0.169368	yes	0.765559	yes	1.77246
chr1	29122300	29122800	mm10_chr1.29122300.29122800	2.1925	5.63e-07	0.996537	1.28287	1.50988	1.64259	1.63558	1.63044	1.87225	1.14156	0.582785	1.1272	1.11051	1.32111	MM10000000010891651	0.976215	NA	0.995975	yes	yes	yes	yes	yes	yes	yes	yes	no	Gm597 (-342298)	EYS (+425729)	0.216746	yes	-0.184897	no	0.755473
chr1	35986627	35987127	mm10_chr1.35986627.35987127	2.61217	2.31e-05	0.754794	0.594568	1.93405	0.6205	1.17011	1.17155	1.16578	0.442586	0.633199	0.56991	1.424	0.952822	MM10000000010925973	0.671135	NA	NA	yes	yes	yes	no	yes	yes	no	yes	no	Hs6st1 (-81523)	HS6ST1 (-71425)	0.244646	no	0.14267	no	0.0989873
chr1	36006972	36007472	mm10_chr1.36006972.36007472	1.72525	0.0099815	0.772746	1.78242	0.0940913	2.10768	1.93003	1.82209	0.293098	0.795257	0.716451	1.21592	0.0707652	1.0546	MM10000000010926075	0.959276	NA	0.984172	yes	yes	yes	no	yes	no	no	no	NA	Hs6st1 (-61178)	NA	0.0553551	no	0.476516	yes	0.907674
chr1	36173354	36173854	mm10_chr1.36173354.36173854	2.46139	3.16e-07	1.89917	2.83449	1.22004	0.685454	1.20613	1.9695	2.46959	2.51451	1.62072	2.35308	0.93358	1.79148	MM10000000010926907	0.974781	NA	NA	yes	yes	yes	yes	yes	yes	yes	yes	no	Uggt1 (+70701)	UGGT1 (+69770)	0.159488	yes	0.858004	yes	0.380305
chr1	36173602	36174102	mm10_chr1.36173602.36174102	2.46139	3.16e-07	2.31396	2.78004	1.53218	1.54122	2.044	1.71161	2.00464	0.247784	1.68009	2.27516	1.26706	1.76343	MM10000000010926908	0.997774	NA	NA	yes	yes	yes	yes	yes	yes	yes	yes	no	Uggt1 (+70453)	UGGT1 (+69523)	0.018322	yes	0.609461	yes	0.0128406
chr1	36201656	36202156	mm10_chr1.36201656.36202156	1.89204	0.000453801	1.38817	0.927678	0.480494	1.90343	2.45772	1.77691	1.83659	0.222902	1.08563	0.881915	0.443177	1.2186	MM10000000010927048	0.977042	NA	NA	yes	yes	yes	yes	yes	no	no	yes	no	Uggt1 (+42399)	UGGT1 (+31703)	0.09677	no	0.703726	no	0.102634
chr1	36949725	36950225	mm10_chr1.36949725.36950225	2.15812	0.000976255	1.74168	1.7343	1.57279	0.55727	0.536772	1.09571	0.431812	1.50716	1.49893	1.20041	1.31362	1.19913	MM10000000010930788	0.956887	NA	NA	yes	yes	yes	yes	no	yes	no	yes	no	Tmem131 (-10153)	TMEM131 (-10185)	0.00602	yes	0.827138	no	1.26054
chr1	39007373	39007873	mm10_chr1.39007373.39007873	3.15523	7.51e-16	2.08262	4.08288	2.26753	3.05639	3.41549	3.39227	2.2465	1.72296	1.42045	3.01246	1.21428	2.53762	MM10000000010941077	0.999432	NA	NA	yes	yes	yes	yes	yes	yes	yes	yes	no	Pdcl3 (+22015)	PDCL3 (+41609)	0.31271	yes	1.04527	yes	1.8724
chr1	39730656	39731156	mm10_chr1.39730656.39731156	3.0753	1.37e-18	1.12993	3.37401	0.482262	1.69579	1.67075	2.39939	1.28923	0.885452	0.743401	2.55058	0.23865	1.49631	MM10000000010944693	0.994565	NA	NA	yes	yes	yes	yes	yes	yes	yes	yes	no	Rfx8 (-9909)	RFX8 (-3510)	0.285592	yes	0.136858	no	0.759124
chr1	40375484	40375984	mm10_chr1.40375484.40375984	1.90645	0.000570327	1.89712	3.13237	2.28558	2.28862	2.56651	2.2226	3.84496	2.22881	1.45462	2.55201	1.94223	2.4014	MM10000000010947917	0.998308	NA	0.99701	yes	yes	yes	yes	yes	yes	yes	yes	no	Il1rl2 (+51044)	IL1RL2 (+52150)	-0.082022	no	0.847499	yes	0.919204
chr1	40889518	40890018	mm10_chr1.40889518.40890018	1.86415	0.00122004	1.86785	3.46257	2.05565	2.81542	2.62341	2.87674	2.10912	2.28108	1.18444	2.79842	1.58696	2.33288	MM10000000010950487	0.889469	0.997916	0.995547	yes	yes	yes	yes	yes	yes	yes	yes	no	Tmem182 (+84167)	TMEM182 (+88450)	0.2971	yes	0.384795	yes	1.66732
chr1	43067153	43067653	mm10_chr1.43067153.43067653	2.04342	0.00242255	0.50199	2.21564	0.425043	2.12665	2.29838	2.10767	1.74993	0.679498	0.573808	1.83361	0.446005	1.35984	MM10000000010961376	0.437833	NA	0.980354	yes	yes	yes	yes	yes	no	no	yes	no	Tgfbrap1 (+31219)	TGFBRAP1 (+33766)	0.254678	no	0.290765	yes	0.126508
chr1	50993729	50994229	mm10_chr1.50993729.50994229	1.94651	1.77e-05	0.518861	1.56298	1.52666	1.09618	1.11741	0.862719	1.64608	0.00229022	0.233894	1.1545	1.0618	0.980307	MM10000000011001008	0.892946	NA	NA	no	no	no	no	no	no	no	yes	no	Tmeff2 (+66460)	TMEFF2 (+67326)	0.175328	yes	-0.244079	yes	0.62002
chr1	52336613	52337113	mm10_chr1.52336613.52337113	2.87506	7.64e-21	1.16359	1.3658	3.07731	0.423178	0.486458	0.536542	2.74321	2.00506	0.982067	1.24165	2.08732	1.46474	MM10000000011007723	0.839719	NA	0.995821	yes	yes	yes	yes	yes	yes	yes	yes	no	Gls (-103640)	GLS (-94268)	0.065074	no	0.214189	yes	1.09513
chr1	54739039	54739539	mm10_chr1.54739039.54739539	2.28981	0.000349826	1.0186	2.01842	1.27979	0.753741	0.940313	1.53791	1.81965	1.08143	0.680408	1.61349	1.23926	1.27118	MM10000000011019735	0.840812	NA	NA	yes	yes	yes	yes	yes	yes	yes	yes	no	Pgap1 (-181607)	PGAP1 (-167571)	0.107042	no	-0.244017	yes	1.77265
chr1	58603677	58604177	mm10_chr1.58603677.58604177	1.98922	0.00683519	0.984735	1.93665	1.58686	1.30363	1.60469	1.07594	1.75612	2.57761	0.533469	1.31357	0.981072	1.42312	MM10000000011039058	0.994889	NA	0.983459	yes	yes	yes	yes	yes	no	no	no	NA	Ndufb3 (+17543)	NA	0.27451	no	0.328665	no	0.951029
chr1	59271683	59272183	mm10_chr1.59271683.59272183	2.43018	9.33e-07	0.836499	0.626709	3.0217	0.681235	0.570017	0.598085	3.68625	1.60884	0.525863	0.3852	2.30474	1.34956	MM10000000011042398	NA	NA	0.999611	yes	yes	yes	yes	yes	no	no	yes	no	Cdk15 (+15026)	CDK15 (+10028)	0.125328	yes	0.0656665	no	0.431571
chr1	59634882	59635382	mm10_chr1.59634882.59635382	2.01915	0.00137442	1.08027	0.994031	1.56504	0.0210616	0.326459	0.812779	1.41286	0.323958	0.840295	0.909747	1.27582	0.869302	MM10000000011044214	NA	NA	NA	yes	yes	yes	yes	yes	yes	yes	yes	no	Sumo1 (+35702)	SUMO1 (+39986)	0.028606	no	0.211662	yes	0.378201
chr1	59635154	59635654	mm10_chr1.59635154.59635654	2.01915	0.00137442	0.766201	2.00711	0.854837	1.79582	1.99382	2.2866	1.30892	0.0189363	0.528056	1.63079	0.616327	1.25522	MM10000000011044216	NA	NA	NA	yes	yes	yes	yes	yes	yes	yes	yes	no	Sumo1 (+35430)	SUMO1 (+39639)	0.125434	no	0.0599149	yes	0.53673
chr1	59733989	59734489	mm10_chr1.59733989.59734489	2.35992	4.52e-12	1.03019	1.8271	0.302317	1.15867	1.69097	1.61293	0.143122	0.631795	0.761126	1.38457	0.0588018	0.963781	MM10000000011044710	0.981922	NA	NA	yes	yes	yes	yes	yes	no	no	no	NA	Bmpr2 (-29161)	NA	0.024856	no	0.322782	no	-0.815725
chr1	61587259	61587759	mm10_chr1.61587259.61587759	2.79197	5.99e-20	1.01467	1.65686	3.23236	0.186118	0.220524	0.647591	4.15791	2.18027	0.675239	1.28681	2.5109	1.61539	MM10000000011053976	0.941114	NA	NA	no	no	no	no	no	no	no	yes	no	Pard3b (-51315)	PARD3B (-40082)	0.2833	yes	-0.0785756	yes	1.57005
chr1	61631489	61631989	mm10_chr1.61631489.61631989	2.65302	5.37e-12	1.26024	2.35575	0.708618	3.01955	2.52887	2.59687	1.653	3.28474	0.95401	1.86042	0.598413	1.89277	MM10000000011054197	0.978861	NA	NA	yes	yes	yes	yes	yes	yes	yes	yes	no	Pard3b (-7085)	PARD3B (-4192)	0.13491	yes	0.614112	no	1.78883
chr1	61979891	61980391	mm10_chr1.61979891.61980391	2.36373	2.85e-09	1.6508	2.77457	3.04359	2.81981	3.12494	3.09566	2.76377	1.07925	1.17902	2.41643	2.29947	2.38612	MM10000000011055939	0.986352	NA	NA	yes	yes	yes	yes	yes	yes	yes	yes	no	Pard3b (+341317)	PARD3B (+389721)	-0.235596	no	0.669273	no	1.76691
chr1	62391054	62391554	mm10_chr1.62391054.62391554	1.99645	0.000490955	1.21293	2.60167	1.66128	2.55599	2.81689	2.9682	1.69318	0.274981	0.646419	2.00037	1.02296	1.76862	MM10000000011057995	0.999404	NA	NA	yes	yes	yes	yes	yes	no	no	yes	no	Nrp2 (-312398)	NRP2 (-332082)	0.830786	no	-0.0634229	no	1.29145
chr1	64492279	64492779	mm10_chr1.64492279.64492779	2.19224	0.0014896	0.707918	1.67332	0.840716	1.62778	1.89097	1.71214	1.83311	1.34409	0.499658	1.2726	0.507227	1.2645	MM10000000011068501	0.989059	NA	NA	yes	yes	yes	yes	yes	yes	yes	no	NA	Creb1 (-40280)	NA	0	yes	0.433466	no	1.67192
chr1	67170192	67170692	mm10_chr1.67170192.67170692	3.09129	3.78e-16	0.429457	0.435484	0.548349	0.785404	0.857692	0.767843	0.210898	1.00968	0.107173	0.386096	0.614257	0.559303	MM10000000011081891	0.994098	NA	NA	yes	yes	yes	yes	yes	yes	yes	yes	no	Cps1 (+47416)	CPS1 (+126988)	1.02469	yes	-0.452577	no	0.0176595
chr1	67170432	67170932	mm10_chr1.67170432.67170932	3.09129	3.78e-16	1.52081	1.94584	0.949285	0.989961	1.50931	1.47709	2.64934	0.672185	0.989142	1.68043	0.711119	1.37223	MM10000000011081892	0.991089	NA	NA	yes	yes	yes	yes	yes	yes	yes	yes	no	Cps1 (+47656)	CPS1 (+127227)	0.911534	yes	0.584865	no	0.614118
chr1	67521332	67521832	mm10_chr1.67521332.67521832	2.1478	1.98e-05	0.920614	1.93488	0.107486	1.33171	1.90927	1.71075	1.37012	0.306878	0.686656	1.35614	0.089883	1.06585	MM10000000011083646	NA	NA	NA	no	yes	yes	yes	yes	yes	yes	yes	no	Cps1 (+398556)	CPS1 (+488487)	0.043424	no	0.854023	no	0.40214
chr1	67521773	67522273	mm10_chr1.67521773.67522273	2.1478	1.98e-05	0.542967	1.21378	0.562999	1.32333	1.35905	1.53131	0.582357	0.0758515	0.307467	0.910279	0.544008	0.813945	MM10000000011083649	0.883716	NA	0.987535	yes	yes	yes	yes	yes	yes	yes	yes	no	Cps1 (+398997)	CPS1 (+488841)	0.51568	no	-0.0329614	no	0.313897
chr1	74325841	74326341	mm10_chr1.74325841.74326341	2.61279	6.95e-06	1.22282	2.03214	1.09559	0.542409	1.38331	0.912175	1.62662	0.757138	0.978216	1.66762	0.803158	1.18375	MM10000000011117669	0.98863	NA	0.989877	yes	yes	yes	yes	yes	yes	yes	no	NA	Tmbim1 (-21730)	NA	0.057684	yes	0.912303	yes	-0.246867
chr1	76658148	76658648	mm10_chr1.76658148.76658648	2.18805	2.24e-05	0.626131	1.54131	1.36034	0.314975	0.0333169	0.712631	2.42644	2.33702	0.544907	1.21297	1.14978	1.11453	MM10000000011129330	0.987767	NA	NA	yes	yes	yes	yes	yes	yes	yes	yes	no	Epha4 (+856690)	EPHA4 (+895625)	0.286152	no	0.0225828	no	0.0332012
chr1	78350518	78351018	mm10_chr1.78350518.78351018	1.61703	0.00531268	0.91524	1.36275	0.899113	0.789853	1.17225	1.16321	1.13883	2.80336	0.615795	1.15974	0.586586	1.14607	MM10000000011137792	0.933876	NA	0.997571	yes	yes	yes	yes	yes	yes	yes	yes	no	Sgpp2 (+40423)	SGPP2 (+39912)	0.325878	no	0.302342	no	-0.0117444
chr1	78350913	78351413	mm10_chr1.78350913.78351413	1.61703	0.00531268	0.56524	0.681814	2.6073	0.120839	0.421532	0.200694	3.49573	0.395283	0.381304	0.620676	1.81229	1.02752	MM10000000011137794	NA	NA	0.995044	no	yes	yes	yes	yes	yes	yes	yes	no	Sgpp2 (+40818)	SGPP2 (+40324)	0.002776	no	0.262719	no	0.876354
chr1	78351148	78351648	mm10_chr1.78351148.78351648	1.61703	0.00531268	0.499989	1.27832	0.665869	0.130273	0.0867977	0.526419	1.57607	0.278795	0.25554	1.01469	0.716872	0.639058	MM10000000011137795	NA	NA	NA	no	yes	yes	no	yes	yes	no	yes	no	Sgpp2 (+41053)	SGPP2 (+40692)	0.186036	no	-0.0646548	no	-0.0821621
chr1	78576394	78576894	mm10_chr1.78576394.78576894	2.98832	3.94e-23	2.00443	3.07657	3.46107	2.18092	2.45443	1.77875	3.94036	3.30813	1.18129	2.19481	2.51793	2.55443	MM10000000011138922	0.9886	NA	0.998397	yes	yes	yes	yes	yes	yes	yes	yes	no	BC035947 (-64486)	ACSL3 (-82938)	0.025684	no	0.147362	no	2.15158
chr1	79755299	79755799	mm10_chr1.79755299.79755799	1.75165	0.00200166	1.06971	1.26896	0.617193	1.49281	1.56683	1.47348	1.3938	0.104923	0.864416	1.11318	0.460639	1.03872	MM10000000011144816	0.93543	NA	NA	yes	yes	yes	yes	yes	yes	yes	yes	no	Wdfy1 (+6220)	WDFY1 (+7124)	0.0875881	yes	0.433404	no	-0.0614056
chr1	84549897	84550397	mm10_chr1.84549897.84550397	1.70598	0.00196982	1.37248	0.409681	1.04595	1.02761	1.40999	0.27194	0.912278	1.82257	0.986671	0.571501	0.696436	0.95701	MM10000000011168789	0.938241	NA	0.994375	yes	yes	yes	yes	yes	yes	yes	yes	no	Dner (+146074)	DNER (+154156)	0.352832	no	0.620392	no	0.0606695
chr1	84646782	84647282	mm10_chr1.84646782.84647282	1.99555	4.63e-06	1.85272	1.53304	1.45435	1.26649	1.41256	1.46296	2.38344	2.88766	1.24366	1.30647	1.17042	1.63398	MM10000000011169274	0.975161	NA	0.994956	yes	yes	yes	yes	yes	yes	yes	yes	no	Dner (+49189)	DNER (+55018)	0.023958	yes	0.942056	yes	0.919509
chr1	88785148	88785648	mm10_chr1.88785148.88785648	2.749	3.3e-07	1.06011	2.02282	1.01489	1.11214	1.2204	1.56765	1.197	0.794834	0.896564	1.51791	0.795645	1.2	MM10000000011189965	NA	NA	NA	yes	yes	yes	yes	yes	no	no	no	NA	Arl4c (-83177)	NA	0.039292	no	0.515447	yes	0.293239
chr1	91671007	91671507	mm10_chr1.91671007.91671507	3.23433	8.05e-11	2.20184	2.97433	1.25625	2.36806	2.63461	2.76727	2.00126	2.97264	1.54048	2.29224	0.814318	2.16575	MM10000000011204395	0.999707	NA	NA	yes	yes	yes	yes	yes	yes	yes	yes	no	Twist2 (-130213)	TWIST2 (-190718)	0.204634	yes	1.03437	yes	1.33884
chr1	92012484	92012984	mm10_chr1.92012484.92012984	3.18729	3.77e-15	2.17978	1.59359	1.5431	0.822607	1.07062	1.61035	1.61988	1.57232	1.82879	1.40016	1.29583	1.50337	MM10000000011206102	0.966947	NA	NA	yes	yes	yes	yes	yes	yes	yes	yes	no	Hdac4 (+167607)	HDAC4 (+224604)	0.292068	yes	1.42826	yes	1.07718
chr1	93217082	93217582	mm10_chr1.93217082.93217582	1.7197	0.00247555	2.13597	4.16725	0.937373	2.20976	3.36795	4.04699	2.55729	3.44005	1.89394	3.24931	0.251222	2.56883	MM10000000011212125	0.999497	NA	0.979679	yes	yes	yes	yes	yes	yes	yes	yes	no	Sned1 (-18509)	SNED1 (-31110)	-0.33179	yes	1.36574	yes	-0.0672274
chr1	93217481	93217981	mm10_chr1.93217481.93217981	1.7197	0.00247555	2.74517	3.44141	1.43742	1.30991	2.37291	2.5195	2.4752	3.30258	2.21597	2.95505	0.897086	2.33384	MM10000000011212127	0.999791	NA	NA	yes	yes	yes	yes	yes	yes	yes	yes	no	Sned1 (-18110)	SNED1 (-30606)	-0.159062	yes	1.04762	yes	0.802388
chr1	94149993	94150493	mm10_chr1.94149993.94150493	1.99557	0.000459721	0.523562	0.897886	2.12308	1.06269	0.615918	1.46349	1.76364	0.27958	0.190964	0.761468	1.63401	1.02875	MM10000000011216790	0.80406	NA	0.989828	yes	yes	yes	yes	yes	no	no	yes	no	Pdcd1 (-97690)	CHD1 (-183820)	-0.019766	no	-0.261081	no	0.349258
chr1	94671607	94672107	mm10_chr1.94671607.94672107	2.38348	1.77e-14	2.40794	3.51921	1.64262	2.94162	3.21503	2.6654	2.74035	0.0526265	1.55586	2.49769	1.20428	2.22206	MM10000000011219398	0.998343	NA	NA	yes	yes	yes	yes	yes	no	no	yes	no	Pdcd1 (-619304)	FAM174A (-283130)	0.195898	yes	0.681195	yes	1.8857
chr1	97617132	97617632	mm10_chr1.97617132.97617632	1.92008	0.00382067	1.75194	3.92602	1.11385	2.24395	2.26122	2.80564	1.42271	3.98767	1.21849	3.10435	1.00976	2.25869	MM10000000011234125	0.997715	NA	NA	no	yes	yes	yes	yes	yes	yes	no	NA	D1Ertd622e (+44692)	NA	0.058168	no	-0.073332	no	0.44391
chr1	97793331	97793831	mm10_chr1.97793331.97793831	2.19917	1.43e-07	0.631677	1.19311	1.54714	2.12174	1.66004	1.85606	0.582124	1.19027	0.379351	0.981514	1.26465	1.21888	MM10000000011235006	0.978047	NA	NA	yes	yes	yes	yes	yes	yes	yes	yes	no	Ppip5k2 (-23170)	GIN1 (+34921)	0.03348	no	-0.40887	yes	0.746018
chr1	106371622	106372122	mm10_chr1.106371622.106372122	2.0541	4.35e-10	1.3294	0.610443	2.09401	0.952374	0.765471	0.781899	2.53587	0.596378	0.864326	0.572832	1.75808	1.16919	MM10000000011277898	0.962953	NA	0.9989	yes	yes	yes	yes	yes	yes	yes	yes	no	Phlpp1 (+200120)	PHLPP1 (+234914)	0.059796	yes	-0.0259091	no	1.31666
chr1	108259343	108259843	mm10_chr1.108259343.108259843	2.66382	5.99e-16	1.00475	0.343863	0.788423	0.373093	0.609059	0.367903	1.7134	1.01713	0.723509	0.166485	0.489924	0.690685	MM10000000011287336	0.977348	NA	0.986188	yes	yes	yes	yes	yes	yes	yes	no	NA	Serpinb8 (+669587)	NA	0.049316	yes	0.400356	yes	1.39196
chr1	116184375	116184875	mm10_chr1.116184375.116184875	2.36253	2.06e-06	0.902356	1.82726	1.23919	0.235859	0.187573	0.704758	1.62611	1.88872	0.542588	1.38733	0.771017	1.02843	MM10000000011326962	0.781423	NA	NA	yes	yes	yes	yes	yes	yes	yes	yes	no	Cntnap5a (+499869)	CNTNAP5 (+499349)	0.339582	no	0.248108	yes	0.799956
chr1	119404746	119405246	mm10_chr1.119404746.119405246	2.56413	7.93e-10	1.63118	1.66189	1.25579	0.283945	0.650067	0.624998	2.1755	1.61465	1.24687	1.34702	0.856631	1.2135	MM10000000011343063	0.998063	NA	NA	yes	yes	yes	yes	yes	yes	yes	yes	no	Inhbb (+17252)	INHBB (+21681)	0.361962	yes	0.997086	no	0.175784
chr1	121394779	121395279	mm10_chr1.121394779.121395279	2.66437	4.4e-14	1.49742	1.01221	1.82347	0.608609	0.833076	0.578878	1.26709	2.28337	0.983144	0.75277	1.27482	1.17408	MM10000000011353014	0.924217	NA	0.993933	yes	yes	yes	yes	yes	yes	yes	yes	no	Ccdc93 (-36020)	CCDC93 (-36458)	0.840954	no	0.510344	no	1.41878
chr1	121464466	121464966	mm10_chr1.121464466.121464966	2.09546	0.000276414	0.926767	0.73899	2.06422	0.24727	0.30982	0.210616	2.13327	0.330588	0.524095	0.442796	1.55	0.861676	MM10000000011353362	0.93896	NA	NA	yes	yes	yes	yes	yes	yes	yes	yes	no	Ccdc93 (+33667)	CCDC93 (+41334)	0.100312	no	-0.188826	no	0.157759
chr1	121630301	121630801	mm10_chr1.121630301.121630801	1.94518	9.96e-06	1.6432	1.57872	2.28979	1.27128	1.59833	1.35161	4.44614	0.30172	1.29488	1.47814	1.76269	1.72877	MM10000000011354191	NA	NA	NA	no	no	no	no	no	no	no	yes	no	Ddx18 (-62562)	DDX18 (-74805)	0.113096	no	0.748403	no	1.55032
chr1	123156778	123157278	mm10_chr1.123156778.123157278	3.20167	5.6e-21	0.248209	0.726001	0.512403	0.360128	0.344776	0.697536	0.368885	1.35668	0.0116427	0.468589	0.316851	0.491973	MM10000000011361824	0.701482	NA	0.984232	yes	yes	yes	yes	yes	yes	yes	yes	no	Dpp10 (+888531)	DPP10 (+879377)	0.074882	yes	-0.273493	no	0.143452
chr1	125922471	125922971	mm10_chr1.125922471.125922971	2.80071	2.85e-08	0.694932	2.77066	2.01039	2.02693	2.09427	2.33451	2.10773	4.18083	0.572438	2.1198	1.33006	2.02205	MM10000000011375652	0.994279	NA	NA	yes	yes	yes	yes	yes	yes	yes	yes	no	Lypd1 (-10507)	LYPD1 (-6718)	0.15358	no	0.515023	yes	1.34975
chr1	127416836	127417336	mm10_chr1.127416836.127417336	2.28109	6.85e-09	0.884463	1.39477	0.559436	1.60306	2.06341	1.81923	1.6439	2.9	0.52445	1.27939	0.422299	1.37222	MM10000000011383124	0.998874	NA	NA	yes	yes	yes	yes	yes	yes	yes	yes	no	Mgat5 (+212068)	MGAT5 (+249947)	0.366044	yes	0.062735	yes	0.140438
chr1	127980892	127981392	mm10_chr1.127980892.127981392	1.97617	0.000330339	0.969688	2.31859	1.32844	0.800048	1.00714	1.86701	1.40814	1.61824	0.654462	1.72004	1.30928	1.36373	MM10000000011385944	0.930469	NA	NA	yes	yes	yes	yes	yes	yes	yes	yes	no	Rab3gap1 (+112369)	RAB3GAP1 (+192680)	0.166018	yes	0.750012	yes	0.89436
chr1	129624421	129624921	mm10_chr1.129624421.129624921	2.03217	0.000326785	0.354315	0.16815	1.74001	0.313591	0.627784	0.781116	1.00338	0.411527	0.281965	0.371894	1.21276	0.66059	MM10000000011394162	0.455801	NA	0.997228	yes	yes	yes	yes	yes	yes	yes	yes	no	Thsd7b (+351327)	THSD7B (+346661)	0.413428	no	-0.0356168	no	-0.170659
chr1	129756535	129757035	mm10_chr1.129756535.129757035	3.36586	8.28e-30	1.37046	2.53836	0.747522	0.925483	1.33835	1.29529	0.556179	0.665603	0.908453	1.89998	0.506469	1.15929	MM10000000011394822	0.926623	NA	0.979382	yes	yes	yes	yes	yes	yes	yes	yes	no	Thsd7b (+483441)	THSD7B (+463887)	0.343062	yes	0.307583	yes	0.112695
chr1	129756636	129757136	mm10_chr1.129756636.129757136	3.36586	8.28e-30	1.77565	3.06426	1.07909	0.917713	0.823022	1.81775	0.673389	0.488136	1.19871	2.36051	0.468372	1.33333	MM10000000011394823	0.971047	NA	0.989059	yes	yes	yes	yes	yes	yes	yes	yes	no	Thsd7b (+483542)	THSD7B (+463990)	0.270176	yes	0.596419	yes	1.31125
chr1	132798520	132799020	mm10_chr1.132798520.132799020	4.16952	1.59e-10	1.45928	3.09345	0.192158	1.39984	1.83081	1.81211	1.15426	3.7884	1.13005	2.20943	0.20126	1.661	MM10000000011410032	0.898841	NA	NA	yes	yes	yes	yes	yes	yes	yes	yes	no	Nfasc (-57013)	NFASC (-60039)	0.025466	no	0.544209	no	0.275721
chr1	134712759	134713259	mm10_chr1.134712759.134713259	3.97619	1.67e-14	1.84495	1.79201	0.632474	1.1085	1.53489	1.57991	1.35326	0.916768	1.4308	1.60533	0.528657	1.3025	MM10000000011419604	0.995452	NA	NA	yes	yes	yes	yes	yes	yes	yes	yes	no	Syt2 (+3709)	SYT2 (+3927)	-0.045816	no	0.505239	no	-0.924579
chr1	134718981	134719481	mm10_chr1.134718981.134719481	2.7866	2.44e-18	2.57602	2.79198	0.328976	0.962708	1.3227	1.49227	1.18891	1.11026	2.03618	2.26605	0.362266	1.49439	MM10000000011419635	0.998915	NA	NA	yes	yes	yes	yes	yes	yes	yes	yes	no	Syt2 (+9931)	SYT2 (+10495)	-0.178362	yes	1.0224	yes	0.553172
chr1	134719581	134720081	mm10_chr1.134719581.134720081	2.7866	2.44e-18	2.48152	2.72631	0.688358	0.683889	1.01394	1.1689	1.04392	1.81964	1.99113	2.2563	0.3367	1.47369	MM10000000011419638	0.994941	NA	0.983442	yes	yes	yes	no	yes	yes	no	yes	no	Syt2 (+10531)	SYT2 (+11123)	-0.022134	yes	1.53614	yes	-0.278774
chr1	134727199	134727699	mm10_chr1.134727199.134727699	3.31327	1.33e-11	2.61976	3.76079	0.678918	0.632134	1.13287	1.96029	1.89937	3.87239	1.9876	2.98981	0.442826	1.99789	MM10000000011419676	0.99769	NA	NA	yes	yes	yes	yes	yes	yes	yes	yes	no	Syt2 (+18149)	SYT2 (+20783)	-0.050228	no	1.09279	yes	0.197521
chr1	134823114	134823614	mm10_chr1.134823114.134823614	2.59065	4.71e-11	0.982158	1.53173	2.00082	0.320258	0.199597	0.162849	2.73305	1.88106	0.694725	1.09949	1.63366	1.20358	MM10000000011420155	0.995318	NA	NA	yes	yes	yes	yes	yes	no	no	yes	yes	Syt2 (+114064)	SYT2 (+137139)	0.557944	no	-0.0389056	no	0.826347
chr1	137016854	137017354	mm10_chr1.137016854.137017354	2.1474	2.02e-05	1.34299	2.79917	0.720518	1.29473	1.44498	2.12752	0.620815	0.901946	0.990166	2.12218	0.283765	1.33171	MM10000000011431124	0.974578	NA	NA	yes	yes	yes	yes	yes	no	no	yes	no	Nr5a2 (-56656)	NR5A2 (-89655)	0.643548	yes	0.317385	no	0.681782
chr1	138446781	138447281	mm10_chr1.138446781.138447281	2.64973	1.34e-13	1.22886	0.152487	1.13749	0.106802	0.511933	0.48558	0.630817	0.565884	0.873214	0.376599	0.90468	0.634031	MM10000000011438274	0.992626	NA	0.990637	yes	yes	yes	yes	yes	yes	yes	yes	no	Nek7 (+172718)	NEK7 (+178622)	0.053012	yes	0.243696	yes	1.09736
chr1	138653881	138654381	mm10_chr1.138653881.138654381	2.31761	3.34e-14	1.25025	0.967504	2.52278	0.16319	0.0696692	0.00360052	2.87471	2.18054	0.838389	0.745467	1.84055	1.22333	MM10000000011439309	0.944189	NA	0.998933	yes	yes	yes	yes	yes	yes	yes	yes	no	Nek7 (-34382)	NEK7 (-24482)	0.153692	yes	0.540925	no	0.00541762
chr1	141381893	141382393	mm10_chr1.141381893.141382393	2.11654	4.73e-05	1.21503	1.0744	3.12617	0.595217	0.592875	0.467905	3.55512	0.175488	0.810069	0.706436	2.32067	1.33085	MM10000000011452949	0.930937	NA	0.999839	yes	yes	yes	yes	yes	yes	yes	no	NA	NONE	NA	-0.057306	no	0.19712	no	0.9746
chr1	153076057	153076557	mm10_chr1.153076057.153076557	3.03177	1.39e-13	1.87538	2.28101	0.390156	1.53821	1.35991	1.44068	1.0951	1.90191	1.50234	1.95835	0.324029	1.42428	MM10000000011511420	0.950084	NA	NA	yes	yes	yes	yes	yes	yes	yes	yes	no	Lamc2 (+110140)	LAMC2 (+104802)	-0.031038	yes	0.9529	yes	0.634737
chr1	153129938	153130438	mm10_chr1.153129938.153130438	3.01583	1.1e-23	1.98662	1.94123	1.25107	2.06328	2.27403	1.50247	3.02788	1.76502	1.39175	1.5007	1.10199	1.80055	MM10000000011511689	0.999609	NA	0.999839	yes	yes	yes	no	yes	yes	no	yes	no	Lamc2 (+56259)	LAMC2 (+51984)	0.404984	yes	0.535263	yes	1.03016
chr1	154829628	154830128	mm10_chr1.154829628.154830128	2.71377	2.46e-06	1.79789	0.0904888	0.973769	0.428741	0.403241	0.79776	1.91513	1.34833	1.30344	0.361428	0.798637	0.928987	MM10000000011520188	0.98995	NA	NA	yes	yes	yes	no	yes	yes	no	yes	no	Cacna1e (-103522)	CACNA1E (-106935)	0.333712	yes	0.416205	no	0.125305
chr1	154829969	154830469	mm10_chr1.154829969.154830469	2.71377	2.46e-06	1.48858	1.18447	2.06079	1.11679	0.749766	0.70111	2.49407	0.875055	1.15766	0.879826	1.606	1.30128	MM10000000011520190	NA	NA	NA	no	yes	yes	no	yes	yes	no	yes	no	Cacna1e (-103863)	CACNA1E (-107301)	0.132428	yes	0.298868	no	0.467943
chr1	155069790	155070290	mm10_chr1.155069790.155070290	2.17579	7.52e-06	1.31193	2.00738	2.30633	1.03904	1.36236	1.42859	3.09257	3.5649	0.911716	1.73432	1.77639	1.86687	MM10000000011521389	0.969424	NA	0.998754	yes	yes	yes	yes	yes	yes	yes	yes	no	Ier5 (+29596)	IER5 (+30659)	0.253192	no	0.319624	yes	1.03269
chr1	156217858	156218358	mm10_chr1.156217858.156218358	1.90453	0.000229239	1.86938	1.28409	0.684487	0.51914	0.470842	0.846317	0.498718	1.84272	1.32969	1.1642	0.420121	0.99361	MM10000000011527129	0.963251	NA	0.998184	yes	yes	yes	yes	yes	yes	yes	yes	no	Fam163a (-13082)	FAM163A (-10885)	0.158284	no	0.678895	no	0.433293
chr1	156218259	156218759	mm10_chr1.156218259.156218759	1.90453	0.000229239	1.19757	1.05804	0.935765	2.12026	2.13979	1.70364	1.62546	2.80897	0.858155	0.82624	0.772875	1.4588	MM10000000011527131	0.998885	NA	NA	yes	yes	yes	yes	yes	yes	yes	yes	no	Fam163a (-13483)	FAM163A (-11204)	0.152838	no	0.367269	no	0.674696
chr1	156543832	156544332	mm10_chr1.156543832.156544332	3.02668	1.51e-10	1.66336	2.08349	2.60657	1.15913	1.84577	1.38819	3.15397	1.7322	1.32629	1.88606	1.90694	1.88654	MM10000000011528759	0.998677	NA	NA	yes	yes	yes	yes	yes	yes	yes	no	NA	Abl2 (-14967)	NA	0.128334	no	0.670333	no	0.797474
chr1	158298940	158299440	mm10_chr1.158298940.158299440	2.20479	0.000279087	1.87477	1.99333	2.12863	0.967317	1.62646	0.717176	2.96194	1.04144	1.236	1.32309	1.20819	1.55258	MM10000000011537534	NA	NA	NA	no	yes	yes	yes	yes	yes	yes	yes	no	Brinp2 (+57136)	BRINP2 (+54760)	0.084174	yes	0.323749	no	0.982354
chr1	158299197	158299697	mm10_chr1.158299197.158299697	2.20479	0.000279087	1.48027	2.03015	0.591616	1.80087	1.56433	1.71242	0.758085	0.487657	1.14545	1.79062	0.300641	1.24201	MM10000000011537536	0.957121	NA	NA	yes	yes	yes	yes	yes	yes	yes	yes	no	Brinp2 (+56879)	BRINP2 (+54467)	0.44772	yes	0.666655	no	0.202354
chr1	159068415	159068915	mm10_chr1.159068415.159068915	2.89	1.17e-13	0.452223	1.97513	0.0631311	2.10902	2.44771	2.46335	0.484242	0.993317	0.295482	1.56256	0.101201	1.17703	MM10000000011541382	0.985359	NA	NA	yes	yes	yes	yes	yes	yes	yes	yes	no	Pappa2 (-110298)	PAPPA2 (-4463)	0.591364	yes	0.367394	no	-0.195615
chr1	159068627	159069127	mm10_chr1.159068627.159069127	2.89	1.17e-13	1.50114	1.41103	0.0941326	0.38591	0.632865	1.26828	0.0713593	1.12059	1.30479	1.27004	0.19868	0.841711	MM10000000011541383	0.945035	NA	NA	yes	yes	yes	yes	yes	yes	yes	yes	no	Pappa2 (-110510)	PAPPA2 (-4640)	0.309796	yes	0.893253	no	0.251819
chr1	159406265	159406765	mm10_chr1.159406265.159406765	1.92763	0.000379227	2.02553	3.05195	1.73819	2.1011	2.17665	2.04946	1.79702	3.43263	1.55829	2.41061	1.42669	2.16074	MM10000000011543071	0.984434	0.999965	0.992429	yes	yes	yes	yes	yes	yes	yes	yes	no	Tnr (-117254)	TNR (-128114)	0.186256	yes	1.21883	no	0.645266
chr4	125275225	125275725	mm10_chr4.125275225.125275725	2.85703	1.05e-12	2.75616	3.0307	2.27654	4.74352	4.93578	4.25437	2.92099	1.06331	2.22921	2.6011	1.4368	2.93168	MM10000000008879127	0.999499	NA	NA	yes	yes	yes	yes	yes	yes	yes	yes	yes	Zc3h12a (-147635)	ZC3H12A (-191556)	0.386728	yes	1.45269	yes	1.36225
chr1	161159695	161160195	mm10_chr1.161159695.161160195	1.94639	0.00575942	0.102604	0.369051	2.49659	0.384024	0.738218	0.229505	2.9217	0.25458	0.00615521	0.145252	2.02326	0.879176	MM10000000011551838	NA	NA	NA	yes	yes	yes	yes	yes	yes	yes	no	NA	Ankrd45 (+17178)	NA	0.142432	no	-0.383757	no	0.396354
chr1	161159889	161160389	mm10_chr1.161159889.161160389	1.94639	0.00575942	1.30019	2.17488	2.35732	0.760587	1.27804	1.07817	3.38731	3.1614	1.05777	1.75711	1.64186	1.81406	MM10000000011551839	0.992531	NA	NA	yes	yes	yes	yes	yes	yes	yes	no	NA	Ankrd45 (+17372)	NA	0.091724	no	0.836098	no	0.616698
chr1	165346160	165346660	mm10_chr1.165346160.165346660	2.97296	4.5e-13	1.11906	2.25729	0.98301	1.56454	1.89796	2.14711	1.61695	1.31494	0.802182	1.64935	0.822444	1.47044	MM10000000011572771	0.912398	NA	0.992964	yes	yes	yes	yes	yes	yes	yes	yes	no	Gpr161 (+50621)	GPR161 (+89702)	0.104994	yes	1.16783	yes	1.94821
chr1	166840129	166840629	mm10_chr1.166840129.166840629	2.28106	1.46e-07	0.711117	0.611499	1.4366	1.21852	1.36332	1.14554	2.57158	0.0887787	0.665905	0.562306	1.20645	1.05287	MM10000000011580240	0.842769	NA	NA	yes	yes	yes	yes	yes	no	no	yes	no	Fmo9 (-158534)	POGK (-485157)	0.177474	no	0.294469	no	0.154882
chr1	166892897	166893397	mm10_chr1.166892897.166893397	2.68066	3.33e-12	1.63435	3.51348	1.33994	2.41037	2.75691	2.92719	1.94992	3.80312	1.20861	2.69405	1.15544	2.30849	MM10000000011580504	0.935234	NA	NA	yes	yes	yes	yes	yes	yes	yes	yes	no	Fam78b (-108270)	UCK2 (+474087)	0.01468	yes	0.738323	no	0.883663
chr1	167457638	167458138	mm10_chr1.167457638.167458138	2.3003	9.91e-13	1.10191	1.42289	0.504507	1.01681	1.355	2.11638	1.17631	0.14859	0.907035	1.1607	0.18569	1.00871	MM10000000011583328	0.995025	0.999633	0.986721	yes	yes	yes	yes	yes	no	no	yes	no	Lrrc52 (+8892)	LRRC52 (+7839)	0.382414	yes	0.58139	no	-0.495729
chr1	167458131	167458631	mm10_chr1.167458131.167458631	2.3003	9.91e-13	1.57496	1.05116	0.0719969	0.545532	0.29649	0.608577	0.503537	0.129898	1.21922	0.816242	0.0521227	0.624521	MM10000000011583330	0.99174	NA	NA	no	yes	yes	yes	yes	no	no	yes	no	Lrrc52 (+8399)	LRRC52 (+7348)	0.055722	yes	0.661621	no	0.385034
chr1	168164469	168164969	mm10_chr1.168164469.168164969	1.83458	4.95e-06	1.90894	1.01935	1.13582	0.605347	1.10734	1.22464	0.653096	0.525239	1.42213	1.00649	0.583745	1.01747	MM10000000011586862	0.972354	NA	0.991074	yes	yes	yes	no	yes	no	no	yes	no	Pbx1 (+267178)	PBX1 (+282342)	0.405878	no	0.714786	no	0.668041
chr1	169367516	169368016	mm10_chr1.169367516.169368016	2.04212	1.84e-07	1.47329	2.94397	1.41787	0.422532	1.18675	1.88411	3.53105	2.98972	1.04153	2.41278	0.79052	1.82674	MM10000000011592877	NA	NA	NA	no	yes	yes	yes	yes	no	no	yes	no	Nuf2 (+163698)	NUF2 (+183268)	0.72915	yes	0.333627	yes	1.40978
chr1	170412066	170412566	mm10_chr1.170412066.170412566	1.85243	0.000284995	0.96781	0.0676632	1.65602	0.757473	1.02334	0.598754	1.3269	2.33894	0.525713	0.150951	1.37922	0.981162	MM10000000011598100	0.953589	NA	0.996313	yes	yes	yes	yes	yes	yes	yes	yes	no	Spata46 (+103513)	SPATA46 (+113236)	0.165032	no	0.105054	no	0.961407
chr1	170538502	170539002	mm10_chr1.170538502.170539002	1.70713	0.000104107	1.45996	1.54331	1.65909	1.28911	1.38626	1.40039	1.75987	2.67138	1.13821	1.0848	1.22668	1.51082	MM10000000011598732	0.987297	NA	NA	yes	yes	yes	yes	yes	yes	yes	yes	no	Nos1ap (+51109)	NOS1AP (+65577)	0.466762	yes	0.441326	yes	1.53283
chr1	170664693	170665193	mm10_chr1.170664693.170665193	1.93403	1.5e-07	0.654603	1.56031	0.795727	0.00671585	0.0557405	1.15433	0.333441	0.740028	0.652129	1.192	0.726061	0.715553	MM10000000011599363	0.937222	NA	0.988867	yes	yes	yes	yes	yes	no	no	yes	no	Olfml2b (+20411)	OLFML2B (+19681)	0.354234	yes	0.541896	no	-1.12091
chr1	175741773	175742273	mm10_chr1.175741773.175742273	2.7353	3.45e-15	2.61439	4.27981	2.11286	3.31456	3.82838	4.11096	3.03817	1.96225	1.92958	3.19883	1.71657	2.91876	MM10000000011624749	0.989407	NA	NA	yes	yes	yes	yes	yes	yes	yes	yes	no	Wdr64 (+43430)	OPN3 (-61326)	0.265728	yes	0.561137	yes	1.70287
chr1	175747599	175748099	mm10_chr1.175747599.175748099	2.59296	1.54e-11	1.12517	1.53217	0.216647	2.59512	2.6111	2.65493	1.55446	0.22922	0.782315	1.31642	0.0368949	1.33222	MM10000000011624778	0.985358	NA	NA	yes	yes	yes	yes	yes	no	no	yes	no	Wdr64 (+49256)	OPN3 (-75757)	0.245446	yes	0.586876	no	-0.487922
chr6	89315246	89315746	mm10_chr6.89315246.89315746	2.20897	6.04e-05	2.90825	4.33876	0.722468	2.84037	3.58725	3.22316	2.19453	1.77119	2.09533	3.43214	0.57116	2.51678	MM10000000007191482	0.999839	NA	NA	yes	yes	yes	yes	yes	yes	yes	yes	yes	Plxna1 (+47124)	PLXNA1 (+50124)	0.230566	yes	0.859035	yes	0.36312
chr1	178448446	178448946	mm10_chr1.178448446.178448946	2.36074	9.88e-11	0.980684	2.62523	2.33827	1.68081	1.41913	2.24024	2.503	1.80391	0.81937	1.87066	1.79566	1.82518	MM10000000011638282	0.993335	NA	NA	yes	yes	yes	yes	yes	yes	yes	yes	no	Efcab2 (+42593)	EFCAB2 (+72345)	0.027672	yes	0.149798	yes	-0.0964991
chr1	179146828	179147328	mm10_chr1.179146828.179147328	3.12615	1.14e-07	0.956	2.42432	0.421026	1.08606	0.991651	1.62221	0.676685	1.63139	0.598755	1.93101	0.018065	1.12338	MM10000000011641774	0.984611	NA	NA	yes	yes	yes	yes	yes	yes	yes	yes	no	Smyd3 (+370956)	SMYD3 (+498050)	-0.04171	no	-0.0544344	no	-0.27208
chr1	180597475	180597975	mm10_chr1.180597475.180597975	2.19329	3.37e-05	0.610067	0.726068	1.33073	0.377774	0.237024	0.819932	0.276571	0.424472	0.508445	0.649677	0.962547	0.629392	MM10000000011649027	0.991975	NA	0.99264	yes	yes	yes	yes	yes	no	no	yes	no	Parp1 (+28796)	PARP1 (+42450)	-0.341248	yes	0.248781	no	-1.26786
chr1	181299604	181300104	mm10_chr1.181299604.181300104	2.53602	7.62e-08	0.84276	1.33155	1.0223	2.2049	1.79482	1.89237	1.44677	0.851016	0.629455	1.22782	0.774307	1.27437	MM10000000011652538	0.995314	0.999935	NA	yes	yes	yes	yes	yes	yes	yes	yes	no	Cnih3 (-52774)	CNIH3 (-75967)	0.453842	no	0.626252	no	1.462
chr1	182491689	182492189	mm10_chr1.182491689.182492189	2.41218	1.8e-06	0.756524	1.46365	1.81487	0.655428	0.79853	0.9232	0.848431	3.54506	0.47719	1.0953	0.961622	1.21271	MM10000000011658498	0.99571	NA	0.993442	yes	yes	yes	yes	yes	yes	yes	yes	no	Capn2 (+25585)	CAPN2 (+33285)	0.238738	no	0.0576063	yes	-0.0843764
chr1	183109196	183109696	mm10_chr1.183109196.183109696	1.79553	0.00450481	0.40972	0.995992	1.54407	0.45566	0.217009	0.721407	1.82218	0.286948	0.105882	0.677804	1.07151	0.755289	MM10000000011661586	0.890178	NA	0.989123	yes	yes	yes	yes	yes	no	no	yes	no	Disp1 (+112039)	DISP1 (+52879)	0.0513057	no	0.100017	no	0.129006
chr1	185596789	185597289	mm10_chr1.185596789.185597289	2.49944	1.62e-06	1.81169	2.12179	1.71878	2.00143	2.15451	2.17725	2.68766	0.909741	1.30686	1.64982	1.32287	1.80567	MM10000000011674024	0.932255	NA	NA	yes	yes	yes	yes	yes	no	no	yes	no	Slc30a10 (+142191)	SLC30A10 (+157511)	0.25027	no	0.672031	no	0.0652022
chr1	186979329	186979829	mm10_chr1.186979329.186979829	3.0982	9.63e-13	1.01531	1.70689	0.878769	2.01021	1.83233	2.42008	1.8246	0.942851	0.926033	1.53577	0.654308	1.43156	MM10000000011680936	0.994508	NA	NA	yes	yes	yes	yes	yes	yes	yes	yes	no	D1Pas1 (+12163)	SPATA17 (+309178)	0.680072	yes	0.228901	yes	1.14862
chr1	188193943	188194443	mm10_chr1.188193943.188194443	1.99507	6.01e-05	1.23605	2.33316	0.0806168	2.53772	2.78003	2.42399	1.29583	1.01183	0.834957	1.8256	0.0585827	1.49258	MM10000000011687009	0.855084	NA	NA	yes	yes	yes	yes	yes	yes	yes	yes	no	Ush2a (-68841)	USH2A (-100251)	0.650192	no	0.702946	no	0.640093
chr1	189185172	189185672	mm10_chr1.189185172.189185672	1.94938	3.29e-07	0.399899	2.09191	0.960776	1.24796	1.10356	1.30031	1.22889	2.03607	0.365592	1.55225	0.702218	1.18086	MM10000000011691966	NA	NA	NA	yes	yes	yes	yes	yes	yes	yes	yes	no	Kcnk2 (+157933)	KCNK2 (+176069)	0.218714	yes	0.164103	yes	-0.255315
chr1	189656842	189657342	mm10_chr1.189656842.189657342	2.16144	8.06e-06	0.6886	0.62839	2.99049	0.179803	0.233898	0.829793	2.32464	0.565002	0.535354	0.383081	2.21083	1.05181	MM10000000011694324	NA	NA	NA	no	yes	yes	yes	yes	yes	yes	yes	no	Cenpf (+30994)	CENPF (+39678)	0.42213	no	0.161045	no	-0.018458
chr1	189657397	189657897	mm10_chr1.189657397.189657897	2.16144	8.06e-06	1.40046	0.747391	1.24659	1.56729	1.62164	1.23017	2.97643	1.35872	0.907524	0.522853	0.968417	1.3225	MM10000000011694327	NA	NA	NA	no	no	no	no	no	no	no	yes	no	Cenpf (+30439)	CENPF (+39117)	0.38427	no	0.170652	no	0.0865796
chr1	194001967	194002467	mm10_chr1.194001967.194002467	1.70452	0.00165713	0.454705	3.04497	0.929839	1.13494	1.47285	2.26382	1.44751	2.10176	0.41348	2.30624	0.725066	1.48138	MM10000000011716050	NA	NA	NA	no	yes	yes	yes	yes	yes	yes	yes	no	Plxna2 (-617608)	PLXNA2 (-632344)	-0.00326	no	-0.101681	no	0.0300562
chr1	194002382	194002882	mm10_chr1.194002382.194002882	1.70452	0.00165713	0.638317	0.846631	0.832552	0.0598614	0.293721	1.04308	0.81186	0.667985	0.353446	0.850354	0.907703	0.664137	MM10000000011716052	0.990585	NA	NA	yes	yes	yes	yes	yes	yes	yes	yes	no	Plxna2 (-617193)	PLXNA2 (-631747)	0.065088	no	0.0582316	no	1.08945
chr1	194002665	194003165	mm10_chr1.194002665.194003165	1.70452	0.00165713	0.93325	1.48791	0.830703	1.60177	1.75033	2.24161	1.74137	0.290441	0.528458	1.14322	0.872328	1.22013	MM10000000011716053	0.958566	NA	NA	yes	yes	yes	yes	yes	yes	yes	yes	no	Plxna2 (-616910)	PLXNA2 (-631409)	0.033118	no	0.0447906	no	0.102804
chr1	194693315	194693815	mm10_chr1.194693315.194693815	1.70018	0.000267204	1.2243	1.8825	1.93864	1.06456	1.03827	0.844435	2.14191	0.233458	0.606435	1.25094	1.51496	1.24913	MM10000000011719506	0.749652	NA	0.995105	yes	yes	yes	yes	yes	yes	yes	yes	no	Plxna2 (+73740)	PLXNA2 (+77197)	0.205406	yes	0.50131	no	1.28072
chr10	5298680	5299180	mm10_chr10.5298680.5299180	2.4346	2.83e-07	1.9565	1.77429	1.82812	1.26572	1.83042	2.28547	2.47413	1.48373	1.67453	1.53722	1.17194	1.75292	MM10000000013022216	0.887651	NA	0.995568	yes	yes	yes	yes	yes	yes	yes	yes	no	Gm10097 (+229738)	SYNE1 (+245943)	0.489136	no	1.12837	no	-0.705666
chr10	5301211	5301711	mm10_chr10.5301211.5301711	3.1499	2.41e-05	0.556478	1.1448	1.53943	0.523582	0.298316	0.865257	2.11037	1.05841	0.402052	0.850087	1.15525	0.954912	MM10000000013022229	0.987317	NA	NA	yes	yes	yes	yes	yes	yes	yes	yes	no	Gm10097 (+232269)	SYNE1 (+241496)	0.226964	no	-0.312198	no	0.263708
chr10	6870968	6871468	mm10_chr10.6870968.6871468	1.74675	9.62e-07	0.607675	0.0510109	1.38031	0.151769	0.407951	0.17945	1.54964	0.147361	0.479068	0.0722024	1.11847	0.558628	MM10000000013030078	NA	NA	NA	no	yes	yes	yes	no	no	no	yes	no	Oprm1 (+82409)	OPRM1 (+129350)	0.107768	yes	-0.294985	yes	1.56726
chr10	7260118	7260618	mm10_chr10.7260118.7260618	1.98112	0.00692215	0.651095	1.58221	0.489549	1.38956	1.56606	2.20388	0.527367	0.329905	0.433569	1.22534	0.234348	0.966626	MM10000000013032023	0.911678	NA	NA	yes	yes	yes	yes	yes	yes	yes	yes	no	Cnksr3 (-48131)	CNKSR3 (-58497)	0.410046	no	-0.117988	no	0.711814
chr10	7260361	7260861	mm10_chr10.7260361.7260861	1.98112	0.00692215	1.04084	0.90927	1.01848	0.632952	1.2459	0.326259	1.92455	1.82511	0.851764	0.821795	0.574253	1.01556	MM10000000013032025	0.862378	NA	NA	yes	yes	yes	yes	yes	yes	yes	yes	no	Cnksr3 (-48374)	CNKSR3 (-58670)	0.392886	no	0.182984	no	-0.686697
chr10	7648936	7649436	mm10_chr10.7648936.7649436	1.75311	0.00117842	0.999834	2.3176	0.794665	1.52489	1.90509	2.01872	2.05997	2.09593	0.992736	1.79047	0.528394	1.54803	MM10000000013033967	0.914288	0.96537	NA	yes	yes	yes	yes	yes	yes	yes	yes	no	Pcmt1 (+14422)	PCMT1 (+21788)	0.295896	yes	-0.0986693	no	-0.141145
chr10	7649208	7649708	mm10_chr10.7649208.7649708	1.75311	0.00117842	0.610824	1.39316	1.13003	0.125411	0.27899	0.532633	1.66002	1.19087	0.511493	1.14747	0.837196	0.856191	MM10000000013033969	0.973865	NA	NA	yes	yes	yes	yes	yes	yes	yes	yes	no	Pcmt1 (+14150)	PCMT1 (+21616)	-0.030516	yes	-0.0403108	no	-0.8833
chr10	8238518	8239018	mm10_chr10.8238518.8239018	2.32157	1.93e-06	2.04151	1.50471	1.47616	1.30187	1.60564	1.27742	2.02304	2.11576	1.48645	1.42618	1.26415	1.59299	MM10000000013036915	0.981344	NA	0.997597	yes	yes	yes	yes	yes	yes	yes	no	NA	Ust (+280057)	NA	0.030554	no	0.546434	no	1.35262
chr10	10747568	10748068	mm10_chr10.10747568.10748068	2.86139	1.17e-11	1.00012	1.55712	2.64619	1.11989	1.13236	0.982197	3.64069	3.4038	0.634266	1.0536	1.9824	1.74115	MM10000000013049461	0.861079	NA	NA	yes	yes	yes	yes	yes	yes	yes	yes	no	Gm10944 (+66470)	RAB32 (-192609)	0.135232	no	-0.0732316	no	1.13673
chr10	12180934	12181434	mm10_chr10.12180934.12181434	1.66111	0.000268643	1.36863	1.03173	2.79277	0.791751	1.01138	0.651183	3.9086	0.999131	0.958753	0.697485	2.01509	1.47514	MM10000000013056627	0.935953	NA	0.997609	yes	yes	yes	yes	yes	yes	yes	yes	no	Utrn (+680551)	EPM2A (+704722)	0.20476	yes	-0.132593	yes	1.49017
chr10	12292925	12293425	mm10_chr10.12292925.12293425	1.95799	1.43e-05	0.252107	2.2259	1.75643	0.856426	0.943225	1.14511	2.55279	4.07012	0.176668	1.52858	1.15131	1.51442	MM10000000013057187	NA	NA	NA	no	no	no	no	no	no	no	no	NA	Utrn (+568560)	NA	0.061612	no	-0.591057	no	-0.513551
chr10	12293374	12293874	mm10_chr10.12293374.12293874	1.95799	1.43e-05	0.872342	1.84045	1.12465	1.9971	2.24196	1.67942	1.68568	2.68648	0.897907	1.48062	0.8363	1.57663	MM10000000013057190	0.988948	NA	0.999719	yes	yes	yes	yes	yes	yes	yes	no	NA	Utrn (+568111)	NA	0.062636	no	0.519526	no	1.31019
chr10	13106300	13106800	mm10_chr10.13106300.13106800	2.16683	2.17e-08	1.25882	1.24016	0.923825	0.511504	0.35204	0.591253	1.30098	1.67669	0.99995	0.935543	0.890334	0.971009	MM10000000013061254	NA	NA	NA	no	yes	yes	yes	yes	yes	yes	yes	no	Plagl1 (+15762)	PLAGL1 (-5826)	0.087558	yes	0.16497	no	1.46065
chr6	128166381	128166881	mm10_chr6.128166381.128166881	2.78687	8.32e-13	2.19647	2.73723	3.33112	1.9059	2.14168	2.17669	3.3913	2.29822	1.67038	2.15314	2.4926	2.40861	MM10000000007385738	0.998884	NA	0.995676	yes	yes	yes	yes	yes	yes	yes	yes	yes	Tspan9 (-23068)	TSPAN9 (-22097)	-0.039888	no	0.104807	yes	0.483137
chr10	17377990	17378490	mm10_chr10.17377990.17378490	2.45986	5.88e-07	1.07224	2.09391	1.39621	0.0963736	0.389808	0.958249	1.70179	0.354535	0.893169	1.48512	1.07254	1.04672	MM10000000013082613	NA	NA	NA	no	yes	yes	yes	yes	yes	yes	yes	no	Cited2 (-344993)	CITED2 (-362474)	0.054686	no	-0.227192	yes	0.122717
chr10	17378449	17378949	mm10_chr10.17378449.17378949	2.45986	5.88e-07	1.13934	2.52314	2.34982	2.0915	1.51453	0.941451	3.09553	1.84905	0.998239	1.9437	1.82095	1.84248	MM10000000013082615	0.993373	NA	0.995841	yes	yes	yes	yes	yes	yes	yes	yes	no	Cited2 (-344534)	CITED2 (-361806)	0.206862	no	0.427315	yes	0.586404
chr10	19928190	19928690	mm10_chr10.19928190.19928690	2.20311	0.00232867	1.07431	1.63895	2.04951	1.17087	1.34741	0.92383	2.58089	1.37388	1.00001	1.45173	1.63976	1.47738	MM10000000013095364	NA	NA	NA	yes	yes	yes	yes	yes	yes	yes	no	NA	Map3k5 (-6032)	NA	0.072264	no	0.546967	no	0.938094
chr10	20689198	20689698	mm10_chr10.20689198.20689698	2.09442	0.000182241	1.39344	1.42388	0.864117	0.762148	1.1627	0.388907	1.44223	1.42375	0.99993	1.07668	0.509078	1.04062	MM10000000013099169	0.946734	NA	0.99151	yes	yes	yes	no	yes	yes	no	no	NA	Pde7b (-141120)	NA	0.001668	no	0.529733	no	0.0828865
chr10	20689393	20689893	mm10_chr10.20689393.20689893	2.09442	0.000182241	1.24279	1.95514	0.640347	1.09877	1.02977	1.50497	1.20751	0.378504	1.00001	1.54645	0.274649	1.0799	MM10000000013099170	0.981828	0.998982	0.982339	yes	yes	yes	no	yes	yes	no	no	NA	Pde7b (-141315)	NA	0.005488	no	0.227281	no	-0.701754
chr10	21269305	21269805	mm10_chr10.21269305.21269805	1.82067	0.0002413	0.376416	1.60424	2.44424	0.7623	0.944449	1.20615	2.6224	0.996705	0.321694	1.06036	1.71079	1.27725	MM10000000013102069	NA	NA	NA	no	yes	yes	yes	yes	no	no	yes	no	Hbs1l (-26478)	HBS1L (-14761)	0.0497	no	-0.273207	no	0.469371
chr10	21365572	21366072	mm10_chr10.21365572.21366072	2.22102	1.21e-09	1.76598	2.86692	2.76658	3.1833	3.18998	2.91906	4.50766	0.262236	1.26825	2.35039	2.26888	2.48629	MM10000000013102551	0.933946	NA	0.999219	yes	yes	yes	yes	yes	no	no	yes	no	Aldh8a1 (-11469)	ALDH8A1 (-18041)	0.15786	no	0.265677	no	1.34871
chr10	21462797	21463297	mm10_chr10.21462797.21463297	2.37535	4.1e-07	1.74851	2.248	1.51105	2.07924	1.89567	1.78823	2.3154	1.86164	1.56112	2.11346	1.0945	1.83789	MM10000000013103037	0.937861	NA	NA	yes	yes	yes	yes	yes	yes	yes	yes	no	Aldh8a1 (+85756)	ALDH8A1 (+122760)	0.080816	no	1.17055	no	0.543352
chr10	23089252	23089752	mm10_chr10.23089252.23089752	2.14974	1.27e-06	1.51094	1.06194	1.14403	1.39945	1.62566	2.3745	2.30288	0.472687	1.25521	1.05044	0.991794	1.38087	MM10000000013111169	0.918386	NA	NA	yes	yes	yes	yes	yes	no	no	yes	no	Eya4 (+260401)	EYA4 (+310379)	0.32706	no	0.726413	no	0.0762947
chr10	24481932	24482432	mm10_chr10.24481932.24482432	1.9372	6.82e-07	0.8847	1.47079	0.707807	0.25254	0.202218	0.694226	1.51227	0.909184	0.703005	1.17406	0.733761	0.840415	MM10000000013118132	0.878511	0.968804	0.990457	yes	yes	yes	yes	yes	no	no	yes	no	Ctgf (-113260)	CTGF (-130403)	0.164758	no	0.177465	no	0.476308
chr10	24782807	24783307	mm10_chr10.24782807.24783307	1.73583	0.000384012	1.44123	2.98328	0.783945	0.852448	0.806297	1.1367	0.566182	2.52476	1.06166	2.23662	0.410106	1.34575	MM10000000013119637	0.97963	NA	NA	yes	yes	yes	yes	yes	yes	yes	yes	no	Enpp3 (+53168)	CTAGE9 (-17318)	0.550554	yes	0.611984	no	0.283195
chr10	24783062	24783562	mm10_chr10.24783062.24783562	1.73583	0.000384012	0.579141	1.50929	0.270744	0.597362	0.781525	1.6712	0.691686	0.796401	0.37099	1.32719	0.527237	0.829342	MM10000000013119638	0.879896	NA	NA	yes	yes	yes	yes	yes	yes	yes	yes	no	Enpp3 (+52913)	CTAGE9 (-17039)	0.249686	yes	-0.384645	no	0.396777
chr10	30777883	30778383	mm10_chr10.30777883.30778383	1.58257	0.00106259	1.23147	0.895744	1.7978	0.723915	1.03288	0.707786	3.04431	1.63507	0.881071	0.764213	1.56592	1.2982	MM10000000013149612	0.993952	NA	0.998879	yes	yes	yes	no	yes	yes	no	no	NA	Ncoa7 (-6192)	NA	0.083644	yes	-0.0347681	yes	1.70297
chr10	30778090	30778590	mm10_chr10.30778090.30778590	1.58257	0.00106259	1.77105	0.985346	1.20214	0.343246	0.758741	0.470132	1.2777	0.854609	1.4436	0.989603	1.08246	1.01624	MM10000000013149613	0.98282	NA	0.999235	yes	yes	yes	no	yes	yes	no	no	NA	Ncoa7 (-6399)	NA	0.02519	yes	0.885722	yes	1.61506
chr10	40380094	40380594	mm10_chr10.40380094.40380594	2.90362	1.05e-07	1.10258	2.13529	1.40867	1.65245	2.30341	1.10743	1.59571	0.961969	0.970136	1.56444	1.06641	1.44259	MM10000000013197623	0.998286	NA	NA	yes	yes	yes	yes	yes	yes	yes	yes	no	Cdk19 (+31036)	CDK19 (+59057)	-0.024072	no	0.648766	yes	0.647467
chr10	42104159	42104659	mm10_chr10.42104159.42104659	2.72068	7.91e-11	1.54813	1.33625	1.33728	1.74714	2.14164	1.88137	1.97357	0.0138338	1.19655	1.09784	1.26215	1.41234	MM10000000013206244	NA	NA	NA	yes	yes	yes	yes	yes	no	no	yes	no	Armc2 (-86029)	ARMC2 (-93768)	0.172794	yes	0.702552	no	0.873062
chr10	42112534	42113034	mm10_chr10.42112534.42113034	2.79465	1.1e-07	1.17107	0.912399	1.78754	1.52624	1.27546	1.76201	1.77719	1.59046	0.903957	0.83483	1.36238	1.35487	MM10000000013206285	0.956825	NA	NA	yes	yes	yes	yes	yes	yes	yes	yes	no	Armc2 (-94404)	ARMC2 (-100047)	0.18674	yes	-0.11568	yes	1.54163
chr10	43642106	43642606	mm10_chr10.43642106.43642606	2.67933	1.07e-08	1.1737	0.966455	2.50125	0.324295	0.601428	0.81076	2.11685	1.7626	1.00004	0.883988	1.95805	1.28177	MM10000000013213933	0.898885	0.990224	0.995223	yes	yes	yes	yes	yes	yes	yes	no	NA	Cd24a (+63187)	NA	0.05787	no	0.206016	no	0.843761
chr10	43642244	43642744	mm10_chr10.43642244.43642744	2.67933	1.07e-08	1.03184	0.832093	0.749892	0.461764	0.521806	0.290672	0.367525	1.89844	0.728418	0.731563	0.599754	0.746706	MM10000000013213934	0.85687	NA	0.983601	yes	yes	yes	yes	yes	yes	yes	no	NA	Cd24a (+63325)	NA	0.123594	no	0.0954633	no	-0.125174
chr10	45238511	45239011	mm10_chr10.45238511.45239011	2.59922	2.71e-13	1.33872	1.9107	1.52333	0.114537	0.60356	0.722524	1.73885	1.25897	1.06466	1.60768	0.982072	1.1696	MM10000000013221915	0.984251	NA	NA	no	yes	yes	no	yes	yes	no	no	NA	Popdc3 (-50544)	NA	0	no	0.273428	no	0.287284
chr10	45238946	45239446	mm10_chr10.45238946.45239446	2.59922	2.71e-13	0.743144	0.30349	1.04608	0.31944	0.295085	0.47316	1.35737	1.48384	0.560008	0.290421	0.820506	0.699322	MM10000000013221917	0.980248	NA	0.985275	yes	yes	yes	no	yes	yes	no	no	NA	Popdc3 (-50109)	NA	0	no	-0.152896	no	0.808828
chr10	53485137	53485637	mm10_chr10.53485137.53485637	1.75795	0.00408862	0.53553	0.530474	0.923597	0.229077	0.634077	0.943523	1.11948	0.58698	0.393227	0.493652	0.757386	0.649728	MM10000000013263148	0.639729	NA	0.985957	yes	yes	yes	yes	yes	yes	yes	no	NA	Cep85l (-105440)	NA	0.151518	no	-0.0866123	no	-0.234858
chr10	58657981	58658481	mm10_chr10.58657981.58658481	3.06909	1.86e-23	1.03829	0.968307	0.894207	1.15476	0.637968	0.568952	1.56128	0.904749	1.00002	0.96193	0.665485	0.94145	MM10000000013289013	0.993329	NA	NA	yes	yes	yes	yes	yes	yes	yes	no	NA	Edar (+17423)	NA	0.111772	yes	0.715694	no	-0.00884546
chr10	59011387	59011887	mm10_chr10.59011387.59011887	2.26636	9.56e-09	0.999723	1.06043	0.389567	1.66836	1.90229	2.1943	1.63598	0.0896026	0.817547	1.02159	0.379767	1.10538	MM10000000013290780	0.986233	NA	NA	yes	yes	yes	yes	yes	yes	yes	no	NA	Sh3rf3 (+198179)	NA	-0.073312	yes	0.750602	yes	0.0624519
chr10	60904478	60904978	mm10_chr10.60904478.60904978	2.25898	0.000455507	0.921017	1.86456	1.66946	1.46428	1.54665	2.01803	1.19483	1.19379	0.840423	1.42356	1.26926	1.40053	MM10000000013300245	NA	NA	0.981974	yes	yes	yes	yes	yes	yes	yes	no	NA	Unc5b (-73147)	NA	0.13745	no	0.173815	yes	1.58111
chr10	61001614	61002114	mm10_chr10.61001614.61002114	2.20884	3.43e-09	1.83796	0.956216	1.49338	1.20656	1.14784	0.975186	0.864245	0.637075	1.24831	0.813677	1.02992	1.11003	MM10000000013300731	0.992793	NA	0.998054	yes	yes	yes	yes	yes	yes	yes	yes	no	Pcbd1 (-87495)	PCBD1 (-93842)	0.023808	no	0.569632	no	0.0847971
chr10	61001798	61002298	mm10_chr10.61001798.61002298	2.20884	3.43e-09	2.51166	3.07843	1.39259	2.35943	2.73021	2.4071	1.90063	2.54846	1.80512	2.52782	1.06152	2.21118	MM10000000013300732	0.998868	NA	0.997185	yes	yes	yes	yes	yes	yes	yes	yes	no	Pcbd1 (-87311)	PCBD1 (-93636)	-0.032722	no	1.26157	no	0.529852
chr10	63202972	63203472	mm10_chr10.63202972.63203472	1.69328	0.00136067	1.08525	1.36426	0.70012	0.893745	1.08727	1.23726	1.12838	0.289052	0.894748	1.30175	0.831181	0.983001	MM10000000013311738	0.854771	0.998855	0.993329	yes	yes	yes	yes	yes	no	no	yes	no	Mypn (+730)	MYPN (+928)	0.56722	yes	0.312115	yes	0.964523
chr10	63203701	63204201	mm10_chr10.63203701.63204201	1.69328	0.00136067	1.18651	0.700653	0.228797	0.155531	0.0749287	0.849451	0.939131	2.83047	0.999744	0.922256	0.0586806	0.813287	MM10000000013311741	0.943186	NA	0.983141	yes	yes	yes	yes	yes	no	no	yes	no	Mypn (+1)	MYPN (+252)	0.896868	yes	0.862132	no	0.123458
chr10	63566271	63566771	mm10_chr10.63566271.63566771	2.39331	2.29e-09	2.31858	3.83436	1.32544	4.03371	4.31432	4.43373	2.49085	0.440979	1.81403	3.16752	0.980079	2.65033	MM10000000013313554	0.999839	NA	NA	yes	yes	yes	yes	yes	no	no	yes	no	Ctnna3 (+109011)	CTNNA3 (+156300)	0.221854	yes	0.789756	yes	1.29737
chr10	66322941	66323441	mm10_chr10.66322941.66323441	2.1677	1.96e-07	1.83656	3.57194	1.44426	2.89193	2.70553	3.6997	2.00613	1.04275	1.65003	2.88749	1.11569	2.25927	MM10000000013327337	0.998585	NA	0.979807	yes	yes	yes	yes	yes	yes	yes	yes	no	Reep3 (+773754)	REEP3 (+795133)	0.374812	yes	0.930517	yes	0.618023
chr10	67029282	67029782	mm10_chr10.67029282.67029782	2.7269	3.92e-09	1.51081	2.05186	1.78612	2.36687	2.17619	1.71399	2.43731	2.68842	1.10959	1.63268	1.04192	1.86507	MM10000000013330869	0.998808	NA	NA	yes	yes	yes	yes	yes	yes	yes	yes	no	Reep3 (+67413)	REEP3 (+82908)	0.414074	yes	0.727657	yes	1.28213
chr10	69658226	69658726	mm10_chr10.69658226.69658726	2.01915	7.61e-07	1.68327	2.05367	1.96947	2.33139	2.33374	2.01002	1.71905	2.38121	1.16439	1.549	1.49629	1.88105	MM10000000013344014	0.978127	NA	0.998796	yes	yes	yes	yes	yes	yes	yes	yes	no	Ank3 (+124704)	ANK3 (-50223)	0.0971	no	0.509036	yes	1.21257
chr10	70376910	70377410	mm10_chr10.70376910.70377410	1.79216	0.00204249	0.785255	0.784453	0.660448	0.319117	0.380266	0.241291	0.972462	0.773329	0.614504	0.665165	0.800954	0.636113	MM10000000013347607	0.646644	NA	0.9886	yes	yes	yes	no	yes	no	no	yes	no	Fam13c (-63766)	FAM13C (-98435)	0.310928	yes	0.592222	no	0.752618
chr10	70508701	70509201	mm10_chr10.70508701.70509201	3.07655	4.02e-12	2.42312	3.24299	2.2575	3.3553	3.69975	3.94246	3.13074	1.09673	1.90808	2.52277	1.70028	2.66179	MM10000000013348266	0.998744	NA	0.998128	yes	yes	yes	yes	yes	no	no	yes	no	Fam13c (+68025)	FAM13C (+70997)	0.070656	no	0.746259	no	1.11477
chr10	70855727	70856227	mm10_chr10.70855727.70856227	1.56186	0.000367235	1.00036	0.747265	1.48781	1.45635	1.02921	0.548712	2.50048	0.893884	0.804777	0.562693	1.14368	1.10684	MM10000000013350001	0.887015	NA	0.993556	yes	yes	yes	no	yes	no	no	yes	no	Phyhipl (-256686)	PHYHIPL (-263870)	0.232864	yes	0.524931	no	0.713979
chr10	70857142	70857642	mm10_chr10.70857142.70857642	1.56186	0.000367235	1.73603	2.42716	2.14494	1.81342	2.60597	2.29403	3.25986	0.280182	1.38334	1.88125	1.5906	1.94698	MM10000000013350008	0.988631	NA	0.992464	yes	yes	yes	yes	yes	no	no	yes	no	Phyhipl (-258101)	PHYHIPL (-265159)	-0.031802	yes	0.778555	no	0.266201
chr10	70937161	70937661	mm10_chr10.70937161.70937661	2.45641	8.09e-06	0.999981	0.306735	1.83902	1.5284	1.54148	0.956281	2.87344	0.841135	0.941465	0.461507	1.64934	1.26716	MM10000000013350409	0.965152	NA	NA	yes	yes	yes	yes	yes	yes	yes	yes	no	Bicc1 (+222289)	BICC1 (+298495)	-0.02221	yes	0.665393	yes	1.1824
chr10	70937369	70937869	mm10_chr10.70937369.70937869	2.45641	8.09e-06	1.49979	1.77673	0.346869	1.73142	2.24478	1.75382	0.194941	1.53287	1.09982	1.41696	0.263089	1.2601	MM10000000013350410	0.974984	NA	NA	yes	yes	yes	yes	yes	yes	yes	yes	no	Bicc1 (+222081)	BICC1 (+298284)	-0.009088	yes	0.79148	yes	0.907391
chr10	73887751	73888251	mm10_chr10.73887751.73888251	1.80127	0.00251437	1.15095	2.5525	1.81529	2.9078	2.56824	3.01625	2.76838	1.50625	1.00038	1.98795	1.23856	2.0466	MM10000000013365162	0.996185	NA	0.987001	yes	yes	yes	yes	yes	no	no	yes	no	Pcdh15 (+66118)	PCDH15 (+51463)	-0.000812	yes	0.0319934	yes	1.35127
chr10	83202759	83203259	mm10_chr10.83202759.83203259	2.1116	5.9e-08	0.935601	0.268416	0.602149	0.271989	0.346672	0.0987836	0.929655	0.834311	0.731859	0.480083	0.585025	0.55314	MM10000000013411737	0.992835	NA	NA	yes	yes	yes	no	yes	yes	no	yes	no	Slc41a2 (+134873)	SLC41A2 (+159982)	0.172672	yes	0.118299	yes	-0.0137932
chr10	83203032	83203532	mm10_chr10.83203032.83203532	2.1116	5.9e-08	3.07298	4.07921	0.987408	1.0187	1.54601	2.15207	2.99061	3.29618	2.19864	3.47023	0.691434	2.3185	MM10000000013411738	0.996873	NA	NA	no	yes	yes	no	yes	yes	no	yes	no	Slc41a2 (+134600)	SLC41A2 (+159681)	-0.010464	yes	1.10339	yes	0.455669
chr10	84529035	84529535	mm10_chr10.84529035.84529535	2.41133	8.4e-06	1.71461	2.34287	2.88889	2.51875	2.83847	2.56912	2.91627	0.68464	1.16839	1.91187	2.03481	2.14443	MM10000000013418368	0.999877	NA	0.993431	yes	yes	yes	yes	yes	no	no	no	NA	Ckap4 (+4777)	NA	0.00547	yes	0.768404	no	0.257389
chr10	85639715	85640215	mm10_chr10.85639715.85640215	3.5074	2.39e-24	2.68682	2.58779	1.62957	2.06702	3.04679	2.35207	3.12124	3.48502	2.06029	2.06415	1.44483	2.41324	MM10000000013423921	0.995981	NA	NA	yes	yes	yes	yes	yes	yes	yes	yes	no	Pwp1 (-231866)	PWP1 (-50991)	-0.03161	no	1.31533	no	0.708453
chr10	85665175	85665675	mm10_chr10.85665175.85665675	3.83186	2e-34	0.6776	0.912275	1.39763	0.654965	0.726893	1.30492	1.77453	0.924087	0.727032	1.04201	1.21375	1.03234	MM10000000013424049	0.989588	NA	NA	yes	yes	yes	yes	yes	yes	yes	yes	no	Pwp1 (-206406)	PWP1 (-22878)	0.353272	yes	0.341025	yes	1.36452
chr10	86814281	86814781	mm10_chr10.86814281.86814781	1.96384	0.0553772	1.90905	3.25724	2.04136	1.92006	2.30629	1.94671	2.08174	2.15431	1.34977	2.32057	1.36404	2.05919	MM10000000013429794	0.997315	NA	0.983937	no	no	no	no	no	no	no	yes	no	Nt5dc3 (+35526)	NT5DC3 (+40948)	0.06772	no	0.305047	yes	0.831528
chr10	86818689	86819189	mm10_chr10.86818689.86819189	2.17652	3.17e-09	0.556374	0.622189	2.16414	0.922299	1.15519	0.873838	1.85461	2.67853	0.348045	0.83019	1.56015	1.23323	MM10000000013429816	0.644824	NA	0.99053	yes	yes	yes	no	yes	yes	no	yes	no	Nt5dc3 (+39934)	NT5DC3 (+45703)	0.0661261	no	-0.35097	no	0.446354
chr10	88420522	88421022	mm10_chr10.88420522.88421022	1.65502	0.00544742	1.47988	1.81566	0.997423	1.74873	1.93174	1.99948	1.88423	0.96017	0.99983	1.45423	0.997919	1.47903	MM10000000013437825	0.851752	NA	0.993486	yes	yes	yes	yes	yes	yes	yes	yes	no	Sycp3 (-38797)	SYCP3 (-39178)	-0.134848	no	0.329825	no	-0.0972906
chr10	88604975	88605475	mm10_chr10.88604975.88605475	1.75412	0.00432597	1.94396	1.93401	1.84102	2.23714	2.7216	2.1017	2.1012	0.183098	1.55443	1.55194	1.20388	1.76127	MM10000000013438748	0.975979	NA	0.991751	yes	yes	yes	yes	yes	yes	yes	yes	no	Mybpc1 (-200)	MYBPC1 (-202)	0.355654	yes	0.859688	no	0.245635
chr10	91161969	91162469	mm10_chr10.91161969.91162469	1.95947	1.34e-07	1.41904	1.04025	0.951097	1.50089	1.72736	0.95947	1.37319	1.11534	1.18596	1.0459	0.892219	1.20097	MM10000000013451533	0.97191	NA	0.988405	yes	yes	yes	yes	yes	yes	yes	yes	no	Tmpo (+9359)	TMPO (+18334)	0.711314	yes	0.599999	no	0.867107
chr10	92357824	92358324	mm10_chr10.92357824.92358324	2.4662	4.1e-12	0.99995	0.935472	1.01377	0.962244	0.917123	1.07404	1.258	0.446252	0.803945	0.874205	0.809227	0.917657	MM10000000013457512	0.970045	NA	0.994286	yes	yes	yes	yes	yes	no	no	yes	no	Nedd1 (+364346)	NEDD1 (+343517)	0.486198	yes	-0.249154	no	-0.487432
chr10	92358142	92358642	mm10_chr10.92358142.92358642	2.4662	4.1e-12	1.80411	1.33221	1.21216	2.36508	2.20721	1.82306	1.53272	1.18642	1.34377	1.12484	1.00951	1.5401	MM10000000013457513	0.964894	NA	0.993081	yes	yes	yes	yes	yes	no	no	yes	no	Nedd1 (+364028)	NEDD1 (+343200)	0.269776	yes	0.377071	no	1.56645
chr10	93703876	93704376	mm10_chr10.93703876.93704376	3.50239	7.44e-16	0.860673	0.71433	1.51851	0.235435	0.280686	0.448191	1.17953	1.12318	0.664691	0.592663	1.31643	0.812211	MM10000000013464242	0.928747	NA	0.998806	yes	yes	yes	yes	yes	yes	yes	yes	no	Ntn4 (+63077)	NTN4 (+73235)	0.639544	no	0.477291	no	1.86064
chr10	94824287	94824787	mm10_chr10.94824287.94824787	2.69789	9.72e-14	1.00003	2.15074	1.19421	0.322546	0.429747	1.26297	0.940642	1.16471	0.70992	1.57569	0.916488	1.0607	MM10000000013469844	0.725	NA	0.986382	yes	yes	yes	yes	yes	yes	yes	yes	no	Plxnc1 (+120298)	PLXNC1 (+118642)	0.310182	no	-0.0804962	yes	-0.072806
chr10	95207180	95207680	mm10_chr10.95207180.95207680	1.97777	7.96e-05	0.991037	0.569263	0.784504	0.0542747	0.367585	0.0615598	0.964293	1.00039	0.88149	0.594304	0.690345	0.632641	MM10000000013471759	0.923025	NA	0.983513	yes	yes	yes	yes	yes	yes	yes	yes	no	Cradd (+116678)	PDE3A (-442974)	0.0230208	no	0.0136126	no	0.966035
chr10	95687507	95688007	mm10_chr10.95687507.95688007	1.97505	0.00149827	2.77962	4.317	0.387667	3.24861	3.17566	3.39133	1.08643	1.18311	1.89536	3.44796	0.342671	2.29595	MM10000000013474160	0.998879	NA	0.987767	yes	yes	yes	yes	yes	yes	yes	yes	no	Anapc15-ps (-14306)	NUDT4 (-157806)	0.423658	yes	0.881776	yes	1.01028
chr10	95687684	95688184	mm10_chr10.95687684.95688184	1.97505	0.00149827	2.30121	3.11976	0.203772	2.22678	2.8927	2.97267	1.6689	1.1559	1.50618	2.51592	0.218266	1.88928	MM10000000013474161	0.999131	NA	NA	no	yes	yes	yes	yes	yes	yes	yes	no	Anapc15-ps (-14483)	NUDT4 (-158000)	0.362214	yes	0.458763	yes	0.782448
chr10	95824951	95825451	mm10_chr10.95824951.95825451	2.14825	3e-13	0.950983	1.35062	1.13937	0.241573	0.33619	0.85354	1.77619	2.29417	0.848964	1.20489	1.17573	1.10657	MM10000000013474848	0.88682	NA	0.998657	yes	yes	yes	yes	yes	yes	yes	yes	no	Eea1 (-115549)	EEA1 (-132462)	0.431992	yes	0.598833	no	0.346296
chr10	96489467	96489967	mm10_chr10.96489467.96489967	1.98879	5.25e-05	0.32354	0.169412	1.66388	0.762174	0.654845	0.427729	1.62531	0.949733	0.198876	0.287666	1.1499	0.746642	MM10000000013478170	0.747848	0.997947	0.992021	yes	yes	yes	yes	yes	yes	yes	yes	no	Btg1 (-127289)	BTG1 (-137829)	0.495684	no	-0.214294	no	0.158837
chr10	96635513	96636013	mm10_chr10.96635513.96636013	1.74701	0.00177676	1.60898	2.32991	0.429186	1.33225	1.39658	1.93828	1.03943	0.275046	1.13197	1.78225	0.731481	1.27231	MM10000000013478900	0.927	0.999898	NA	yes	yes	yes	yes	yes	no	no	yes	no	Btg1 (+18757)	BTG1 (+18839)	0.17364	yes	0.314666	yes	1.2109
chr10	96860273	96860773	mm10_chr10.96860273.96860773	2.50701	3.14e-10	1.33471	1.49362	2.52543	2.0141	1.97053	1.16689	3.19939	1.37685	0.999982	1.13834	1.74665	1.72423	MM10000000013480024	0.965262	NA	0.996416	yes	yes	yes	yes	yes	yes	yes	yes	no	Btg1 (+243517)	BTG1 (+259311)	0.073886	no	0.0797459	no	0.266686
chr10	97359444	97359944	mm10_chr10.97359444.97359944	2.75049	1.31e-09	0.857853	0.486814	2.01387	0.674615	1.07127	1.25145	1.22048	1.32338	0.763174	0.438704	1.53467	1.05784	MM10000000013482520	0.961189	NA	0.997308	yes	yes	yes	yes	yes	yes	yes	no	NA	Dcn (-119915)	NA	0.065386	no	0.266708	yes	1.22899
chr10	99706684	99707184	mm10_chr10.99706684.99707184	2.19488	5.48e-11	0.99997	0.502403	1.03749	0.997605	0.778264	0.998237	0.987087	0.994713	0.864437	0.626108	0.88889	0.879564	MM10000000013494256	0.634977	NA	0.991463	yes	yes	yes	yes	yes	yes	yes	no	NA	Csl (+52724)	NA	0.158036	yes	0.15072	no	1.03584
chr10	100758227	100758727	mm10_chr10.100758227.100758727	2.41674	2.87e-14	0.653091	1.12626	1.18128	1.41855	1.67078	1.56315	1.61043	1.78226	0.266282	0.927962	0.938757	1.19444	MM10000000013499514	0.956471	NA	NA	yes	yes	yes	yes	yes	yes	yes	yes	no	1700017N19Rik (+166092)	C12orf50 (+197175)	0.030738	no	0.127358	no	-0.0424815
chr10	105858073	105858573	mm10_chr10.105858073.105858573	1.67912	0.00259745	0.926205	0.213338	1.54095	0.217689	0.386984	0.919099	2.15204	2.01958	0.660806	0.321556	0.999809	0.941641	MM10000000013525013	0.93281	NA	0.990416	yes	yes	yes	yes	yes	yes	yes	yes	no	Mettl25 (-16945)	METTL25 (-16994)	0.239576	no	-0.211206	no	0.624764
chr10	105858231	105858731	mm10_chr10.105858231.105858731	1.67912	0.00259745	0.999939	1.5237	1.41141	1.10529	1.42378	1.00978	2.74803	2.59849	0.629967	1.21185	1.20284	1.44228	MM10000000013525014	0.984232	NA	0.997649	yes	yes	yes	yes	yes	yes	yes	yes	no	Mettl25 (-17103)	METTL25 (-17172)	0.246938	no	-0.317161	no	0.454817
chr10	106149340	106149840	mm10_chr10.106149340.106149840	2.56478	5.61e-16	1.26029	2.59913	1.61713	2.88735	3.34298	2.66439	1.94616	1.21641	0.99956	1.91851	1.39968	1.98651	MM10000000013526469	0.965206	NA	NA	yes	yes	yes	yes	yes	yes	yes	yes	no	Mettl25 (-308212)	METTL25 (-295070)	0.09849	yes	0.523413	no	0.77615
chr10	106284247	106284747	mm10_chr10.106284247.106284747	1.96608	0.00115391	1.28996	2.91721	2.43216	1.91953	1.96051	2.16078	3.26989	1.37014	1.00002	2.27521	1.95767	2.05028	MM10000000013527144	0.984531	NA	0.997181	yes	yes	yes	yes	yes	yes	yes	yes	no	Ppfia2 (-185849)	PPFIA2 (-170064)	0.052052	no	-0.157558	yes	0.882686
chr10	111759877	111760377	mm10_chr10.111759877.111760377	1.90615	0.00166494	1.50213	2.97754	1.92005	1.66175	2.15827	2.4399	2.49675	0.261978	1.07232	2.21676	1.51609	1.8385	MM10000000013554522	0.989828	NA	0.999087	yes	yes	yes	yes	yes	no	no	yes	no	Krr1 (-212537)	KRR1 (-243330)	0.150484	no	0.416471	yes	0.92863
chr10	115081551	115082051	mm10_chr10.115081551.115082051	2.87145	9.03e-17	0.656014	2.34504	0.66837	1.235	1.10316	1.87701	0.87901	0.991567	0.595634	1.67059	0.467913	1.13539	MM10000000013571131	0.917759	NA	NA	yes	yes	yes	yes	yes	yes	yes	yes	no	Tph2 (+103221)	TPH2 (+90564)	0.256982	no	-0.227011	no	0.212269
chr10	115999600	116000100	mm10_chr10.115999600.116000100	2.70277	4.28e-09	1.00025	0.357115	1.9086	1.40389	1.22973	0.937056	3.28752	1.87524	0.917607	0.496076	1.37546	1.34441	MM10000000013575721	0.993148	NA	0.996634	yes	yes	yes	yes	yes	yes	yes	no	NA	Ptprr (-18363)	NA	0.0772917	no	0.460893	no	1.28948
chr10	116350576	116351076	mm10_chr10.116350576.116351076	2.87696	2.73e-05	1.40462	3.59007	1.45133	2.27644	2.50689	2.82726	2.70063	0.494427	1.04813	2.50375	0.937431	1.97645	MM10000000013577476	0.995016	NA	NA	yes	yes	yes	yes	yes	no	no	yes	no	Ptprb (+49454)	PTPRB (+82178)	0.425702	no	0.615404	no	0.314729
chr3	117413140	117413640	mm10_chr3.117413140.117413640	1.96252	0.00287338	1.6596	2.2554	2.11631	3.10689	3.03077	2.89712	2.68655	3.21981	1.02023	1.92248	1.8018	2.33791	MM10000000009622351	0.99327	NA	NA	yes	yes	yes	yes	yes	yes	yes	yes	yes	Plppr4 (-52514)	PLPPR4 (-36634)	0.258512	yes	0.419182	yes	1.29108
chr10	118683215	118683715	mm10_chr10.118683215.118683715	2.72942	6.23e-05	1.13185	2.00357	1.45667	1.32689	1.78879	1.71247	1.33528	1.16761	0.90626	1.74377	0.959306	1.41204	MM10000000013589139	0.99616	NA	0.991645	yes	yes	yes	yes	yes	yes	yes	yes	no	Dyrk2 (+185684)	DYRK2 (+178459)	0.228846	no	0.172374	yes	0.411586
chr10	125703220	125703720	mm10_chr10.125703220.125703720	2.02871	0.00638794	0.208539	0.87893	2.30472	0.990348	1.06583	0.796513	2.49976	1.64529	0.109253	0.560906	1.6112	1.15194	MM10000000013624239	0.963063	NA	NA	yes	yes	yes	yes	yes	yes	yes	yes	no	Lrig3 (-262783)	LRIG3 (-239350)	0.076982	no	0.18686	no	1.33594
chr11	3509040	3509540	mm10_chr11.3509040.3509540	2.98504	9.6e-13	2.4873	2.95757	1.83718	2.8705	3.26816	2.69408	3.25751	2.75003	2.01219	2.39597	1.2817	2.52838	MM10000000002535675	0.999909	NA	NA	yes	yes	yes	yes	yes	yes	yes	yes	yes	Inpp5j (-4469)	SELENOM (+761)	0.487496	yes	1.21353	yes	-0.554916
chr11	3509340	3509840	mm10_chr11.3509340.3509840	2.96624	3.08e-19	1.04728	2.38114	0.50096	0.272533	0.222872	0.82496	1.37068	2.31974	1.00003	1.92692	0.303897	1.10646	MM10000000002535676	0.996227	NA	NA	no	yes	yes	yes	yes	yes	yes	yes	yes	Inpp5j (-4769)	SELENOM (+1100)	0.33453	yes	0.244456	yes	-0.805962
chr11	7423463	7423963	mm10_chr11.7423463.7423963	1.74318	2.29e-06	2.6383	2.87884	0.535471	2.44132	2.27357	2.66139	1.85583	0.467168	1.84207	2.15256	0.366836	1.82849	MM10000000002555247	0.998522	NA	0.992129	yes	yes	yes	yes	yes	no	no	yes	no	Igfbp3 (-209816)	IGFBP3 (-247399)	0.04097	yes	0.927693	yes	1.44909
chr11	7448177	7448677	mm10_chr11.7448177.7448677	1.9025	0.000479847	1.9206	2.00394	0.962288	1.72782	2.03606	2.15487	1.51281	0.458502	1.63832	1.72187	0.749244	1.53512	MM10000000002555371	0.99893	NA	NA	yes	yes	yes	yes	yes	no	no	no	NA	Igfbp3 (-234530)	NA	0.056322	yes	1.16772	yes	0.579603
chr11	8776920	8777420	mm10_chr11.8776920.8777420	2.55091	1.27e-19	1.62239	1.31053	2.05939	1.18188	1.61661	1.66179	2.02895	0.975292	1.21212	1.29243	1.38556	1.48609	MM10000000002562014	0.990883	NA	NA	yes	yes	yes	yes	yes	yes	yes	yes	no	Tns3 (-112635)	TNS3 (-130567)	0.07631	yes	0.685304	no	1.17264
chr11	9634268	9634768	mm10_chr11.9634268.9634768	1.84881	0.000508849	1.49902	0.817729	1.57005	1.78731	2.27288	1.45489	2.41719	0.937678	1.00003	0.851781	1.17559	1.43492	MM10000000002566301	0.941813	0.998359	0.993991	yes	yes	yes	no	yes	yes	no	no	NA	Abca13 (+442576)	NA	0.057726	no	0.780689	no	1.46005
chr11	9669780	9670280	mm10_chr11.9669780.9670280	1.94074	0.00198967	1.89714	1.56477	2.41842	0.839709	1.01564	0.977986	3.58853	1.15448	1.30231	1.403	2.00989	1.65199	MM10000000002566479	NA	NA	NA	no	yes	yes	yes	yes	no	no	no	NA	Abca13 (+478088)	NA	0	no	0.309642	no	1.08289
chr11	10002117	10002617	mm10_chr11.10002117.10002617	3.04192	2.07e-17	1.10751	2.53377	1.3341	1.8417	2.31858	2.04819	1.58363	2.17774	0.957259	2.01451	0.931401	1.71349	MM10000000002568140	0.880831	NA	0.992657	yes	yes	yes	yes	yes	yes	yes	yes	no	Abca13 (+810425)	ABCA13 (+699916)	-0.024884	yes	-0.0846848	yes	-0.739605
chr11	12850333	12850833	mm10_chr11.12850333.12850833	3.48326	2.09e-06	0.518147	1.7578	1.08087	1.35415	1.24423	1.95357	0.984891	2.14556	0.415922	1.24641	0.965952	1.2425	MM10000000002582381	0.986275	NA	NA	yes	yes	yes	yes	yes	yes	yes	yes	no	Cobl (-385626)	COBL (-375332)	0.508962	yes	0.277446	yes	1.82031
chr11	16317282	16317782	mm10_chr11.16317282.16317782	2.46946	9.78e-13	1.06215	1.87321	1.78457	1.27327	1.64462	2.13204	2.99791	0.804244	0.999549	1.39579	1.52091	1.58984	MM10000000002599716	0.872704	NA	NA	yes	yes	yes	yes	yes	no	no	yes	no	Vstm2a (+59808)	VSTM2A (+60377)	-0.11864	no	-0.0216657	no	-0.170078
chr11	16317796	16318296	mm10_chr11.16317796.16318296	2.46946	9.78e-13	0.999769	0.634164	1.00585	0.209723	0.414003	0.582509	1.08862	0.128501	0.719317	0.765411	0.716357	0.660384	MM10000000002599719	0.954926	NA	0.99091	yes	yes	yes	yes	yes	no	no	yes	no	Vstm2a (+60322)	VSTM2A (+60845)	0.78754	yes	-0.00456443	no	1.308
chr11	17629755	17630255	mm10_chr11.17629755.17630255	1.81838	0.00547513	1.45378	3.47783	0.818373	3.17789	3.73228	4.22017	2.55582	0.726092	1.17447	2.91056	0.813906	2.27829	MM10000000002606279	0.87993	NA	0.985377	yes	yes	yes	yes	yes	no	no	yes	no	Etaa1 (+323870)	ETAA1 (+297352)	0.263986	yes	0.524445	no	-0.680849
chr11	19267068	19267568	mm10_chr11.19267068.19267568	2.64735	1.9e-14	1.90433	1.1565	1.79538	0.716918	0.620708	0.612801	1.69476	0.0541118	1.06453	1.07711	1.20052	1.08161	MM10000000002614465	0.991617	NA	0.998254	yes	yes	yes	yes	yes	yes	yes	no	NA	Meis1 (-248349)	NA	0.175724	yes	-0.186276	no	-0.120817
chr11	24771016	24771516	mm10_chr11.24771016.24771516	2.06946	7.38e-06	0.984243	0.766666	1.41461	0.911524	1.17463	1.28007	1.35459	0.316101	0.743728	0.6951	1.06682	0.973462	MM10000000002641985	0.946252	0.997509	0.992126	yes	yes	yes	yes	yes	yes	yes	yes	no	Bcl11a (+693093)	BCL11A (+710446)	0.644386	no	0.354139	no	1.65271
chr11	29852664	29853164	mm10_chr11.29852664.29853164	2.58126	3.72e-07	0.634238	0.921958	3.60112	0.838866	1.11162	0.665572	3.09479	0.901483	0.482255	0.73473	2.82679	1.43758	MM10000000002667393	0.971861	NA	0.999954	yes	yes	yes	yes	yes	yes	yes	yes	no	4931440F15Rik (-27246)	EML6 (+120915)	-0.004252	no	-0.0480432	no	1.22227
chr11	30668937	30669437	mm10_chr11.30668937.30669437	2.88938	4.12e-08	1.00004	1.02412	2.19078	0.625171	1.09542	0.396379	1.24285	2.19323	0.87256	0.90344	1.43373	1.17979	MM10000000002671474	0.912626	NA	NA	yes	yes	yes	yes	yes	yes	yes	no	NA	Acyp2 (-19600)	NA	0.0876579	no	0.184942	yes	0.36497
chr11	31292982	31293482	mm10_chr11.31292982.31293482	2.31329	3.48e-05	1.00002	1.41764	3.14636	1.11398	1.46835	0.697043	3.40689	1.07381	0.742898	1.02767	2.30773	1.58204	MM10000000002674595	0.825187	NA	0.999497	yes	yes	yes	yes	yes	no	no	no	NA	Stc2 (+76842)	NA	0.016372	no	-0.215038	no	0.465255
chr11	31653801	31654301	mm10_chr11.31653801.31654301	2.47398	1.2e-13	1.12354	2.29773	1.35429	1.06424	1.10471	1.7084	0.782309	3.13873	0.999988	1.90841	1.06517	1.50432	MM10000000002676399	0.97764	NA	NA	yes	yes	yes	yes	yes	yes	yes	no	NA	Bod1 (+17834)	NA	0.039234	no	0.561263	no	-0.376722
chr11	33445158	33445658	mm10_chr11.33445158.33445658	2.23495	0.00937331	0.734193	1.67944	1.18537	1.86122	1.91171	2.14053	0.995411	0.302035	0.448659	1.16651	0.709563	1.19406	MM10000000002685356	0.708088	NA	NA	yes	yes	yes	yes	yes	no	no	no	NA	Ranbp17 (+68338)	NA	0.047156	no	-0.233374	no	-0.213761
chr11	33798215	33798715	mm10_chr11.33798215.33798715	1.76321	0.000249507	1.29246	1.08201	1.02871	0.881822	0.874538	0.987214	1.4535	0.234333	0.99985	0.988257	0.867991	0.97188	MM10000000002687121	0.950365	NA	0.990567	yes	yes	yes	yes	yes	no	no	yes	no	Kcnip1 (+45120)	KCNIP1 (+50210)	0.39272	no	0.234703	yes	0.454225
chr11	33913146	33913646	mm10_chr11.33913146.33913646	2.77768	5.51e-18	2.20847	2.0365	1.74749	1.90679	2.32557	2.09954	2.44861	2.53563	1.78384	1.70964	1.18916	1.9992	MM10000000002687695	0.993435	NA	NA	yes	yes	yes	yes	yes	yes	yes	no	NA	Kcnmb1 (-49617)	NA	0.05465	yes	0.694879	no	0.692137
chr11	35136936	35137436	mm10_chr11.35136936.35137436	1.74145	6.44e-06	2.66274	5.27909	1.04915	4.27851	4.23471	4.81681	2.05464	2.53617	2.00985	4.25549	0.928524	3.10052	MM10000000002693814	0.999541	NA	NA	yes	yes	yes	yes	yes	yes	yes	yes	no	Slit3 (+15962)	SLIT3 (+14380)	0.617306	yes	0.929774	yes	1.22628
chr11	35609095	35609595	mm10_chr11.35609095.35609595	2.1781	3.27e-06	1.39603	1.24953	2.89058	0.893802	1.02276	1.20307	2.91424	1.36525	0.999542	1.0187	2.21689	1.56094	MM10000000002696175	0.980703	NA	0.999906	yes	yes	yes	yes	yes	yes	yes	yes	no	Pank3 (-160139)	PANK3 (-196315)	-0.029438	no	0.18788	yes	0.697548
chr11	35662560	35663060	mm10_chr11.35662560.35663060	2.68548	7.04e-11	0.877722	1.69966	1.65652	2.02429	1.9601	1.85462	1.99586	0.876294	0.854164	1.49194	1.26131	1.50477	MM10000000002696443	0.991786	NA	0.997966	yes	yes	yes	yes	yes	yes	yes	yes	no	Pank3 (-106674)	PANK3 (-129959)	0.02748	no	-0.0584743	no	0.476877
chr11	36126346	36126846	mm10_chr11.36126346.36126846	2.38573	1.04e-08	1.00399	2.09457	0.622052	0.548238	0.569028	1.37416	0.494936	1.07831	0.94023	1.66271	0.53829	0.993319	MM10000000002698761	0.983402	NA	NA	yes	yes	yes	yes	yes	yes	yes	yes	no	Wwc1 (-146069)	WWC1 (-152546)	0.269256	yes	0.0900245	no	0.269034
chr11	36532353	36532853	mm10_chr11.36532353.36532853	2.53066	0.00043953	0.405245	1.02656	1.51617	0.208134	0.126536	0.778338	1.61161	0.980107	0.248113	0.89356	1.33849	0.83026	MM10000000002700792	0.956651	0.998165	0.996772	yes	yes	yes	yes	yes	yes	yes	yes	no	Wwc1 (-552076)	TENM2 (-37717)	-0.145172	no	-0.203395	no	0.959957
chr11	36893094	36893594	mm10_chr11.36893094.36893594	2.71366	5.02e-12	0.999815	1.02285	0.752558	0.540889	0.611977	1.04508	0.6697	1.03976	0.757484	0.986053	0.571167	0.817939	MM10000000002702595	0.933719	NA	0.998457	yes	yes	yes	yes	yes	yes	yes	yes	no	Tenm2 (+342538)	TENM2 (-409032)	0.11734	yes	-0.103093	no	0.43566
chr11	41745101	41745601	mm10_chr11.41745101.41745601	2.00109	0.000776966	1.33487	3.53813	0.241686	2.34875	2.24929	2.83846	1.16144	1.91603	1.00002	2.68599	0.158247	1.77026	MM10000000002726855	0.940935	NA	NA	yes	yes	yes	yes	yes	yes	yes	yes	no	Gabrg2 (+255181)	GABRG2 (+310501)	0.108844	no	0.864534	no	0.709525
chr11	41792263	41792763	mm10_chr11.41792263.41792763	1.70376	0.00992991	1.05362	1.37325	0.437901	0.444605	0.329782	1.07092	0.732755	1.27981	0.747536	1.08003	0.0529777	0.782108	MM10000000002727091	0.982924	NA	NA	yes	yes	yes	yes	yes	yes	yes	yes	no	Gabrg2 (+208019)	GABRG2 (+254110)	0.207732	no	0.0667735	no	-0.215724
chr11	42523206	42523706	mm10_chr11.42523206.42523706	2.91591	5.67e-19	1.53458	3.62586	0.794193	3.47763	3.14282	3.99326	1.69134	1.57539	1.08575	2.85851	0.461653	2.20373	MM10000000002730746	0.997187	NA	NA	yes	yes	yes	yes	yes	no	no	yes	yes	Gabrb2 (+103699)	GABRB2 (+130080)	0.655076	yes	0.194144	yes	0.898499
chr11	43999947	44000447	mm10_chr11.43999947.44000447	2.90592	1.09e-13	0.740776	2.22789	1.34776	0.903191	0.66552	1.22394	1.651	0.748551	0.379869	1.62884	1.00611	1.1385	MM10000000002738129	0.864748	NA	0.988389	yes	yes	yes	yes	yes	yes	yes	yes	no	Adra1b (-98987)	ADRA1B (-135981)	0.000333999	no	0.0228228	no	-0.252472
chr11	44414513	44415013	mm10_chr11.44414513.44415013	2.2803	0.00131977	1.4772	2.85556	2.08474	1.75088	2.18005	1.96987	2.14476	1.73077	1.25993	2.22509	1.52808	1.9279	MM10000000002740202	0.972068	NA	NA	no	yes	no	yes	no	no	no	yes	no	Il12b (+14700)	IL12B (+16170)	0.10588	no	0.624216	no	0.370324
chr11	45084084	45084584	mm10_chr11.45084084.45084584	2.15802	7.71e-08	1.53131	3.24412	0.85526	1.65853	2.11986	1.84254	1.30978	2.13801	1.03551	2.27005	0.55682	1.68744	MM10000000002743550	0.978205	NA	NA	no	yes	yes	yes	yes	no	no	yes	no	Ebf1 (+467017)	EBF1 (+477755)	0.15629	no	0.702777	no	0.885296
chr11	45084216	45084716	mm10_chr11.45084216.45084716	2.15802	7.71e-08	1.55148	2.68998	1.66106	1.73347	2.19604	2.46517	2.47775	2.64051	0.999876	1.99253	1.18305	1.96281	MM10000000002743551	0.982732	NA	NA	yes	yes	yes	yes	yes	no	no	yes	no	Ebf1 (+467149)	EBF1 (+477887)	0.401134	no	0.288285	yes	0.345276
chr11	45545765	45546265	mm10_chr11.45545765.45546265	2.58998	1.03e-25	1.37052	2.08984	1.43836	3.10839	3.12128	3.21513	2.64741	2.01552	1.0788	1.68399	1.26093	2.09365	MM10000000002745859	0.969827	NA	0.990888	yes	yes	yes	yes	yes	yes	yes	yes	no	Clint1 (-306036)	CLINT1 (-308973)	0.291636	yes	0.644165	no	0.601153
chr11	46325427	46325927	mm10_chr11.46325427.46325927	2.22994	0.00271984	1.02624	2.25833	0.299348	0.517561	0.803997	1.55143	0.189158	1.51956	0.872716	1.54749	0.130449	0.974207	MM10000000002749757	0.997773	NA	NA	no	yes	no	yes	no	no	no	yes	no	Cyfip2 (-13319)	CYFIP2 (-11449)	0.260188	no	-0.177503	no	0.216185
chr11	46385321	46385821	mm10_chr11.46385321.46385821	2.06315	0.000625019	1.26348	3.70408	0.680304	2.64829	2.30125	2.65161	1.493	1.17024	0.999939	2.82811	0.409516	1.8318	MM10000000002750056	0.999556	NA	NA	yes	yes	yes	yes	yes	yes	yes	no	NA	Itk (+3922)	NA	0.057604	no	0.34794	no	-0.854938
chr11	47744704	47745204	mm10_chr11.47744704.47745204	2.19327	1.66e-09	0.281214	0.347782	1.05716	0.63261	1.01158	0.547189	1.31508	1.13566	0.177816	0.351454	0.723969	0.689229	MM10000000002756853	0.659806	NA	0.984062	yes	yes	yes	yes	yes	no	no	no	NA	Sgcd (-365432)	NA	0.071898	no	-0.149882	yes	1.09938
chr11	50397117	50397617	mm10_chr11.50397117.50397617	3.23143	7.63e-16	2.56846	2.97594	1.00531	1.59796	1.99564	2.66868	2.11102	0.540767	2.0633	2.54157	0.926142	1.90862	MM10000000002770115	0.999863	NA	0.992356	yes	yes	yes	yes	yes	yes	yes	yes	no	Hnrnph1 (+19598)	HNRNPH1 (+25781)	-0.201338	yes	1.46039	no	-0.233307
chr11	51065873	51066373	mm10_chr11.51065873.51066373	2.80155	0.000180542	1.42606	1.01492	1.93436	1.29207	1.46614	1.31731	1.9834	0.920207	1.14999	1.02873	1.46657	1.36361	MM10000000002773459	0.968999	NA	0.991153	yes	yes	yes	yes	yes	yes	yes	no	NA	Zfp354a (+6308)	NA	0.095875	no	0.319112	no	0.43621
chr11	54149690	54150190	mm10_chr11.54149690.54150190	3.40652	5.32e-15	1.34152	2.18387	2.34124	0.870917	1.02372	0.925259	3.12353	0.233208	0.999999	1.36052	1.69395	1.46343	MM10000000002788878	0.92323	NA	NA	yes	yes	yes	yes	yes	yes	yes	no	NA	P4ha2 (+48977)	NA	0.08505	no	0.312803	no	0.0298379
chr11	55746758	55747258	mm10_chr11.55746758.55747258	2.22557	0.0057884	1.00034	1.16551	0.642443	0.00928929	0.140443	0.652714	0.386202	1.083	1.00033	0.863454	0.524322	0.678913	MM10000000002796864	0.341279	NA	NA	no	no	no	no	no	no	no	yes	no	Glra1 (-139187)	GLRA1 (-166748)	0.10659	no	0.448871	no	-0.285631
chr11	56470136	56470636	mm10_chr11.56470136.56470636	1.96522	0.00314127	0.996626	1.1426	0.528922	1.54727	1.49739	1.97853	0.754187	0.388334	0.723237	0.927575	0.570775	1.00504	MM10000000002800480	0.801078	NA	NA	yes	yes	yes	yes	yes	no	no	yes	no	Nmur2 (-429376)	NMUR2 (-502090)	0.212014	yes	0.218745	yes	1.63187
chr11	57163211	57163711	mm10_chr11.57163211.57163711	1.99631	3.68e-05	1.024	1.22601	1.62069	1.04197	1.24392	1.55125	2.04188	2.71698	1.00044	1.01699	1.19724	1.42558	MM10000000002803946	0.912962	NA	0.999639	yes	yes	yes	yes	yes	yes	yes	yes	no	Gria1 (+151651)	GRIA1 (+139676)	-0.016096	no	0.0209773	no	0.549258
chr11	58613300	58613800	mm10_chr11.58613300.58613800	2.87159	1.81e-05	1.16503	1.49182	2.53635	1.41491	1.78792	1.49111	2.47854	2.86079	0.999818	1.36458	1.98615	1.77973	MM10000000002811196	0.906794	NA	NA	yes	yes	yes	yes	yes	yes	yes	no	NA	2210407C18Rik (+2525)	NA	0.082166	no	0.00776455	no	1.05083
chr11	62095085	62095585	mm10_chr11.62095085.62095585	2.27045	8.32e-08	2.22439	2.84139	0.853731	1.75396	2.00384	2.31764	1.40028	0.630356	1.78539	2.42592	0.530335	1.70611	MM10000000002828605	0.921025	NA	0.994687	yes	yes	yes	yes	yes	no	no	no	NA	Specc1 (+66082)	NA	0.06006	yes	1.23695	no	-0.354067
chr11	62494796	62495296	mm10_chr11.62494796.62495296	1.62328	0.00652557	0.85196	0.843885	1.69224	0.224056	0.326895	0.694969	1.85482	1.38074	0.955883	0.830574	1.09865	0.977697	MM10000000002830604	0.87453	NA	0.997831	yes	yes	yes	yes	yes	yes	yes	yes	no	Pigl (+36586)	CENPV (+67251)	0.246578	yes	0.563863	yes	0.710005
chr11	62495128	62495628	mm10_chr11.62495128.62495628	1.62328	0.00652557	0.593579	1.99245	0.162087	0.241409	0.38659	1.21287	0.67058	1.08827	0.655905	1.31175	0.392942	0.791676	MM10000000002830605	0.942519	NA	NA	no	yes	yes	yes	yes	yes	yes	yes	no	Pigl (+36918)	CENPV (+66938)	0.062038	yes	0.231049	yes	-0.106193
chr11	62495399	62495899	mm10_chr11.62495399.62495899	1.62328	0.00652557	0.57747	0.187998	1.42056	0.413415	0.592512	0.867635	0.779146	1.0597	0.672907	0.408887	0.90415	0.716762	MM10000000002830607	0.982683	NA	0.994462	yes	yes	yes	yes	yes	yes	yes	yes	no	Pigl (+37189)	CENPV (+66649)	-0.00544	yes	0.950012	yes	0.418559
chr11	62495524	62496024	mm10_chr11.62495524.62496024	1.62328	0.00652557	1.42117	0.977932	1.56199	0.249792	0.624202	1.34157	1.62299	1.36107	1.12154	1.00574	1.16291	1.1319	MM10000000002830607	0.982683	NA	0.994462	no	yes	yes	yes	yes	yes	yes	yes	no	Pigl (+37314)	CENPV (+66495)	0.01333	yes	0.727631	yes	0.770201
chr11	63190698	63191198	mm10_chr11.63190698.63191198	2.51049	0.000580722	0.661508	0.923631	1.10802	0.319863	0.53438	0.852606	2.07865	2.96517	0.576938	0.856072	0.896886	1.07034	MM10000000002834083	0.98468	NA	0.98724	yes	yes	yes	yes	yes	yes	yes	yes	no	Pmp22 (+61966)	PMP22 (+76789)	0.211064	no	0.886012	yes	1.05408
chr11	63290528	63291028	mm10_chr11.63290528.63291028	1.76811	0.000897588	1.00035	0.829447	1.01627	0.567008	0.687186	0.178336	1.25766	1.78454	0.903573	0.731163	0.774687	0.884565	MM10000000002834582	0.983342	NA	NA	yes	yes	yes	yes	yes	yes	yes	yes	no	Pmp22 (+161796)	PMP22 (+196009)	0.537374	no	0.212616	no	0.218473
chr11	64500806	64501306	mm10_chr11.64500806.64501306	2.7469	6.28e-21	1.78114	3.70483	0.501216	1.84025	2.02132	2.59424	0.821114	2.17043	1.24959	2.97989	0.29242	1.81422	MM10000000002840634	0.997649	NA	NA	yes	yes	yes	yes	yes	yes	yes	yes	no	Hs3st3a1 (+65724)	HS3ST3A1 (+80599)	0.490234	yes	0.302961	no	-0.321306
chr11	64511126	64511626	mm10_chr11.64511126.64511626	2.57195	4.54e-09	2.00581	2.26446	1.88366	2.21929	2.56631	2.20665	2.77837	2.0747	1.2627	1.6415	1.4186	2.02928	MM10000000002840685	0.991731	NA	0.990596	yes	yes	yes	yes	yes	yes	yes	yes	no	Hs3st3a1 (+76044)	HS3ST3A1 (+93713)	0.004668	no	0.112483	no	0.814939
chr11	64511700	64512200	mm10_chr11.64511700.64512200	2.57195	4.54e-09	1.59126	2.16025	0.307333	0.606826	1.09005	1.58876	0.216477	1.96079	1.2983	1.71355	0.405645	1.17629	MM10000000002840688	0.908057	NA	NA	no	no	no	no	no	no	no	yes	no	Hs3st3a1 (+76618)	HS3ST3A1 (+94292)	0.125882	no	0.937618	no	0.213174
chr11	65226633	65227133	mm10_chr11.65226633.65227133	2.04204	1.91e-07	1.98565	3.88667	0.351934	3.26985	3.57331	3.95033	1.69893	2.5982	1.52874	3.04595	0.342564	2.38474	MM10000000002844263	0.990919	NA	0.989436	yes	yes	yes	yes	yes	yes	yes	yes	no	Myocd (+43106)	MYOCD (+46603)	0.440222	yes	0.872321	no	-0.302366
chr11	65660878	65661378	mm10_chr11.65660878.65661378	2.92372	3.8e-07	1.76168	1.59189	1.58338	1.83304	1.7942	1.81318	2.29752	0.910312	1.33382	1.4986	1.31718	1.61225	MM10000000002846434	0.971215	NA	NA	yes	yes	yes	yes	yes	no	no	yes	no	Map2k4 (+127169)	MAP2K4 (+189938)	0.006702	no	0.605224	no	1.22057
chr11	66749733	66750233	mm10_chr11.66749733.66750233	1.8611	0.0035505	1.87522	1.27445	1.82405	0.402073	0.679015	0.534579	1.57037	0.0980826	1.26892	1.03792	1.64805	1.11025	MM10000000002851878	0.670006	NA	0.99983	no	no	no	no	no	no	no	yes	no	Pirt (-161998)	PIRT (-160771)	0.049468	no	-0.0893342	no	1.08337
chr11	67104652	67105152	mm10_chr11.67104652.67105152	2.74111	0.000323432	1.61687	3.60747	1.55323	1.48296	1.90106	1.94016	3.00797	4.12017	1.27389	2.78808	1.19841	2.22639	MM10000000002853653	0.993944	NA	NA	yes	yes	yes	no	yes	no	no	yes	no	Myh3 (+26602)	MYH3 (+30701)	-0.007528	no	0.611315	no	1.40117
chr11	67626047	67626547	mm10_chr11.67626047.67626547	2.76623	8.99e-09	2.56986	3.09301	2.6759	2.0178	2.30547	2.59325	3.26696	1.10729	2.03191	2.49783	1.86901	2.36621	MM10000000002856260	0.991321	NA	0.992317	yes	yes	yes	yes	yes	no	no	yes	no	Gas7 (+39761)	RCVRN (-82797)	-0.063226	no	1.18734	no	0.690004
chr11	67904868	67905368	mm10_chr11.67904868.67905368	2.47761	0.00117466	1.50113	3.55868	2.3514	2.08355	2.06327	1.67485	3.37451	3.59816	1.02518	2.66139	1.71341	2.32778	MM10000000002857654	0.979094	NA	NA	yes	yes	yes	yes	yes	yes	yes	yes	no	Usp43 (+17035)	USP43 (+19891)	0.066226	no	0.385454	no	1.17132
chr11	68041216	68041716	mm10_chr11.68041216.68041716	3.11422	4.21e-16	1.27029	1.63949	0.947653	0.12189	0.72614	0.603463	2.36691	1.77882	1	1.37155	0.886694	1.15572	MM10000000002858336	0.87584	NA	NA	yes	yes	yes	yes	yes	no	no	no	NA	Stx8 (+75273)	NA	0.028116	no	0.154591	yes	0.548764
chr11	68041566	68042066	mm10_chr11.68041566.68042066	3.11422	4.21e-16	1.56184	2.20083	1.46156	2.04648	2.79716	2.41375	3.04868	0.403092	1.29874	1.73133	1.26225	1.8387	MM10000000002858338	0.941495	NA	NA	yes	yes	yes	yes	yes	yes	yes	no	NA	Stx8 (+75623)	NA	0.097434	no	0.761136	yes	0.210249
chr11	71669982	71670482	mm10_chr11.71669982.71670482	2.24445	2.38e-08	2.23196	2.36044	1.68834	2.67324	3.27612	2.53649	2.91025	0.00679847	1.9947	1.92818	1.15631	2.06935	MM10000000002876480	0.998903	NA	NA	yes	yes	yes	yes	yes	no	no	yes	no	Wscd1 (-81144)	WSCD1 (-93746)	0.021708	yes	1.64359	no	0.876991
chr11	72502217	72502717	mm10_chr11.72502217.72502717	1.55633	0.00874582	1.00021	1.10983	0.102704	0.282501	0.863086	1.21464	0.383932	0.373384	1.00002	0.96403	0.204905	0.681749	MM10000000002880641	0.980022	NA	0.994198	yes	yes	yes	no	yes	no	no	yes	no	Spns2 (-12563)	SPNS2 (-16408)	-0.251778	no	1.04052	no	-0.814158
chr11	73070558	73071058	mm10_chr11.73070558.73071058	2.49305	1.02e-06	1.9721	1.7105	1.23781	1.53013	1.70486	1.18857	0.775612	0.234709	1.31551	1.28965	0.766103	1.24778	MM10000000002883483	0.967456	NA	0.999377	yes	yes	yes	no	yes	no	no	yes	no	Itgae (-19775)	ITGAE (-20257)	0.74068	yes	0.723605	no	1.65418
chr11	75223821	75224321	mm10_chr11.75223821.75224321	3.47136	4.11e-12	2.38591	1.58484	1.86092	1.51826	1.90182	1.66263	1.98801	1.64032	1.77986	1.27114	1.50352	1.73611	MM10000000002894249	0.934819	NA	0.997433	yes	yes	yes	yes	yes	yes	yes	no	NA	Rtn4rl1 (+30288)	NA	0.365886	no	0.634113	no	0.421857
chr11	75223989	75224489	mm10_chr11.75223989.75224489	3.47136	4.11e-12	1.7646	1.10686	0.733818	1.44323	1.63048	0.893572	1.30004	3.11252	1.23874	0.802885	0.574344	1.32737	MM10000000002894250	0.845501	NA	NA	yes	yes	yes	yes	yes	yes	yes	no	NA	Rtn4rl1 (+30456)	NA	0.359284	no	0.932952	no	0.0621249
chr11	75285956	75286456	mm10_chr11.75285956.75286456	3.44476	5.01e-11	2.20168	2.31273	0.271051	1.47439	1.24714	2.06247	1.5059	1.80995	1.69308	1.97622	0.101021	1.51415	MM10000000002894560	0.830931	NA	NA	yes	yes	yes	yes	yes	yes	yes	yes	no	Rpa1 (+62104)	RPA1 (+82218)	0.18879	no	0.969971	no	-0.275096
chr11	76225955	76226455	mm10_chr11.76225955.76226455	2.87556	2.14e-08	1.12778	3.84669	2.59271	0.284114	0.404932	1.79594	3.72487	3.3957	0.875058	2.7962	1.70762	2.05015	MM10000000002899260	NA	NA	NA	no	yes	yes	yes	yes	no	no	no	NA	Gemin4 (-8541)	NA	0	no	-0.460086	no	0.186304
chr11	80549803	80550303	mm10_chr11.80549803.80550303	1.90074	2.53e-05	1.89354	1.92262	2.34807	0.507213	0.628855	1.10455	2.77233	0.0573262	1.37528	1.51996	1.91552	1.45866	MM10000000002920879	0.912677	NA	0.99945	yes	yes	yes	yes	yes	no	no	yes	no	Cdk5r1 (+73030)	CDK5R1 (+108447)	0.332998	no	0.581945	no	1.02153
chr11	81329400	81329900	mm10_chr11.81329400.81329900	3.65951	6.56e-14	1.31404	1.38729	2.06544	0.507438	0.632267	0.356657	1.9638	2.09811	0.99986	1.02933	1.46749	1.25652	MM10000000002924777	0.953209	NA	NA	yes	yes	yes	yes	yes	yes	yes	yes	no	Asic2 (-176329)	ASIC2 (-178370)	0.15584	no	0.195509	no	1.47875
chr11	81779848	81780348	mm10_chr11.81779848.81780348	1.80172	4.18e-05	0.999895	1.14928	1.06186	0.574235	0.803479	0.497521	0.176994	0.708351	0.835933	0.748377	0.508792	0.733156	MM10000000002927029	0.830106	NA	0.985011	yes	yes	yes	no	yes	yes	no	yes	no	5530401A14Rik (-80581)	CCL2 (-315739)	0.056182	yes	1.02143	yes	-0.323059
chr11	81780244	81780744	mm10_chr11.81780244.81780744	1.80172	4.18e-05	1.91947	2.03111	1.48304	0.968557	0.823771	0.95964	2.46366	2.3608	1.30761	1.80972	1.23315	1.57823	MM10000000002927031	NA	NA	NA	no	yes	yes	no	yes	yes	no	yes	no	5530401A14Rik (-80185)	CCL2 (-315350)	-0.10374	yes	0.673305	yes	0.89414
chr11	82608922	82609422	mm10_chr11.82608922.82609422	2.00489	0.000111782	1.19501	1.44833	1.60475	1.31061	1.5704	1.45199	1.17071	1.21739	1.21903	1.16019	1.28559	1.33036	MM10000000002931174	0.962587	NA	NA	yes	yes	yes	yes	yes	no	no	yes	no	Cct6b (+155134)	CCT6B (+140909)	0.015464	yes	1.24013	yes	0.564195
chr11	82609139	82609639	mm10_chr11.82609139.82609639	2.00489	0.000111782	1.90378	2.85985	0.34214	0.599542	1.00876	1.70526	1.00602	1.52689	1.35175	2.31739	0.287068	1.35531	MM10000000002931175	0.978008	NA	NA	yes	yes	yes	yes	yes	no	no	yes	no	Cct6b (+154917)	CCT6B (+140789)	0.0971162	yes	0.845679	yes	0.375844
chr11	82719415	82719915	mm10_chr11.82719415.82719915	2.95473	8.18e-06	1.45591	2.67375	1.1243	1.85318	1.83007	1.27067	1.69391	0.813662	1.22499	2.21013	0.959435	1.55546	MM10000000002931727	0.980615	NA	NA	yes	yes	no	no	yes	no	no	yes	no	Cct6b (+44641)	CCT6B (+32991)	0.020788	no	0.807359	no	0.645398
chr11	82831652	82832152	mm10_chr11.82831652.82832152	1.93364	4.28e-05	2.18636	3.64729	0.682897	3.19595	3.27968	3.54195	1.97505	1.35521	1.54354	2.72469	0.636335	2.25172	MM10000000002932288	0.995284	0.999606	NA	yes	yes	yes	yes	yes	yes	yes	yes	no	Rffl (+39308)	RFFL (+42311)	0.687772	yes	0.26355	no	0.245467
chr11	84424247	84424747	mm10_chr11.84424247.84424747	1.99813	0.000129138	0.296923	1.34412	2.0803	1.56295	1.46935	1.28939	1.93422	1.40988	0.362263	1.03164	1.39424	1.28866	MM10000000002940251	0.926921	NA	0.996054	yes	yes	yes	yes	yes	yes	yes	no	NA	Aatf (+89025)	NA	-0.017928	no	0.760068	no	0.170069
chr11	88541642	88542142	mm10_chr11.88541642.88542142	3.45362	1.7e-19	1.70793	3.11255	2.27624	3.27191	3.75652	3.08872	3.70771	2.57317	1.41847	2.26928	1.67522	2.62343	MM10000000002960838	0.999755	NA	NA	yes	yes	yes	yes	yes	yes	yes	yes	no	Msi2 (+176209)	MSI2 (+200106)	0.30592	yes	0.720653	yes	1.38553
chr11	88605130	88605630	mm10_chr11.88605130.88605630	3.68151	4.32e-13	2.5228	3.69456	1.56959	3.25977	3.81862	3.84222	3.65483	1.55218	2.08052	3.07432	1.31223	2.76197	MM10000000002961155	0.994725	NA	NA	yes	yes	yes	yes	yes	yes	yes	yes	no	Msi2 (+112721)	MSI2 (+126635)	0.204654	yes	0.911564	no	0.688749
chr11	89263804	89264304	mm10_chr11.89263804.89264304	1.99569	0.000715583	1.63693	2.86061	1.41461	1.54697	1.71526	1.59708	1.93405	0.75651	1.11252	2.22706	1.10942	1.62827	MM10000000002964449	NA	NA	NA	no	yes	yes	yes	yes	yes	yes	yes	no	Nog (+38278)	NOG (+38144)	0.182204	no	0.450265	no	-0.194911
chr11	89263928	89264428	mm10_chr11.89263928.89264428	1.99569	0.000715583	1.91463	2.67251	1.82649	0.834328	1.18328	1.06444	2.82402	2.34766	1.37631	2.23831	1.40751	1.78995	MM10000000002964449	NA	NA	NA	no	no	no	no	no	no	no	yes	no	Nog (+38154)	NOG (+38082)	-0.036218	no	0.488931	no	0.639848
chr11	89269760	89270260	mm10_chr11.89269760.89270260	1.91752	7.08e-08	0.728596	1.56326	2.21205	1.34856	1.76088	1.69586	1.52198	0.926219	0.585875	1.23148	1.34951	1.35675	MM10000000002964479	0.997161	0.999998	0.98653	yes	yes	yes	yes	yes	yes	yes	yes	no	Nog (+32322)	NOG (+30959)	0.167696	yes	0.176021	no	0.825667
chr11	89526267	89526767	mm10_chr11.89526267.89526767	1.99022	2.85e-05	0.999629	2.33327	1.80638	1.73331	1.62145	1.78921	1.87346	3.09153	0.825073	1.68103	1.28892	1.73121	MM10000000002965761	0.632948	NA	0.993033	yes	yes	yes	yes	yes	yes	yes	yes	no	Ankfn1 (-107569)	NOG (-242801)	0.3677	yes	-0.102069	yes	-0.270702
chr11	89627187	89627687	mm10_chr11.89627187.89627687	1.77283	0.00262043	1.59614	1.78836	1.0013	1.13476	1.79189	1.48777	2.83793	0.0928463	1.20327	1.37803	0.678639	1.36281	MM10000000002966266	0.995467	NA	0.988517	yes	yes	yes	yes	yes	yes	yes	no	NA	Ankfn1 (-208489)	NA	0.0125867	yes	0.81273	no	0.551201
chr11	90292949	90293449	mm10_chr11.90292949.90293449	2.46006	1.43e-11	1.35693	2.20169	0.910596	1.49622	1.41288	1.79363	1.09029	1.72297	0.999971	1.69591	0.683974	1.39682	MM10000000002969594	NA	NA	NA	no	yes	yes	yes	yes	yes	yes	yes	no	Mmd (+43723)	MMD (+44065)	0.048312	yes	0.431586	no	0.949076
chr11	90293406	90293906	mm10_chr11.90293406.90293906	2.46006	1.43e-11	1.05639	1.75518	1.86216	0.606869	1.2291	0.71394	1.8296	1.22876	0.960366	1.25634	1.44448	1.26756	MM10000000002969597	0.995956	NA	0.998977	yes	yes	yes	yes	yes	yes	yes	yes	no	Mmd (+44180)	MMD (+44546)	0.194532	yes	0.334897	no	1.00908
chr11	90451389	90451889	mm10_chr11.90451389.90451889	2.44353	6.6e-08	0.987879	1.16727	1.64474	1.51699	1.51794	1.1691	1.93261	0.592846	0.87842	0.931855	1.21271	1.23203	MM10000000002970387	0.996184	NA	NA	yes	yes	yes	yes	yes	yes	yes	yes	no	Hlf (-60744)	HLF (-63243)	0.340884	yes	0.601874	yes	1.41674
chr11	90860214	90860714	mm10_chr11.90860214.90860714	2.98093	4.64e-13	0.999673	2.64645	0.940479	1.73999	2.02177	1.97255	1.44969	2.87406	0.873773	1.98158	0.760757	1.66007	MM10000000002972431	0.995189	NA	NA	yes	yes	yes	yes	yes	yes	yes	yes	no	Tom1l1 (-172863)	VHLL (-15744)	0	no	0.17185	yes	0.458994
chr11	90860428	90860928	mm10_chr11.90860428.90860928	2.98093	4.64e-13	1.28096	1.6954	2.60984	0.938156	1.09033	0.938762	2.793	1.09415	0.91499	1.19661	1.80478	1.487	MM10000000002972432	0.997916	NA	0.996426	yes	yes	yes	yes	yes	yes	yes	yes	no	Tom1l1 (-173077)	VHLL (-17291)	-0.001342	no	-0.382539	yes	0.528142
chr11	93419839	93420339	mm10_chr11.93419839.93420339	2.45382	4.24e-10	1.87197	1.51684	2.80284	1.55731	1.56676	1.48249	2.5495	1.47106	1.30736	1.16369	1.97252	1.75112	MM10000000002985229	0.878166	NA	0.999614	yes	yes	yes	yes	yes	yes	yes	yes	no	Car10 (+320799)	CA10 (+340076)	-0.037354	no	0.383778	no	1.72833
chr11	94695473	94695973	mm10_chr11.94695473.94695973	3.86239	1.7e-06	0.688681	0.957228	2.56069	0.409797	0.998526	0.991442	2.9746	0.613774	0.470669	0.970308	2.17715	1.25571	MM10000000002991607	NA	NA	NA	yes	yes	yes	yes	yes	yes	yes	yes	no	Gm11541 (+8776)	XYLT2 (-11025)	0.155016	no	-0.168982	no	1.12026
chr11	95272446	95272946	mm10_chr11.95272446.95272946	3.69651	4.34e-10	1.59563	1.64433	1.15443	1.49985	1.44257	1.86289	2.20244	1.41387	0.999885	1.4108	0.801133	1.45708	MM10000000002994492	0.974089	NA	NA	yes	yes	yes	yes	yes	yes	yes	yes	no	Tac4 (+11167)	TAC4 (+15523)	0.040276	no	0.338832	no	0.972852
chr11	95483497	95483997	mm10_chr11.95483497.95483997	3.02504	9.73e-08	0.922019	1.58468	1.14826	0.548355	0.655643	0.797681	1.07773	2.02754	0.827009	1.12527	1.08091	1.07228	MM10000000002995547	0.961062	NA	NA	yes	yes	yes	yes	yes	yes	yes	yes	no	Nxph3 (+30823)	NXPH3 (+33976)	0.055586	no	0.147328	no	0.671129
chr11	97728197	97728697	mm10_chr11.97728197.97728697	3.22703	4.83e-09	2.08517	3.5233	0.802256	1.60385	1.97755	2.33923	0.929463	2.00763	1.59	2.81956	0.393696	1.8247	MM10000000003006771	0.995908	NA	NA	yes	yes	yes	yes	yes	yes	yes	yes	no	Pip4k2b (+16257)	PIP4K2B (+17557)	0.067932	yes	0.945593	yes	-0.257107
chr11	99558559	99559059	mm10_chr11.99558559.99559059	2.82771	7.7e-07	1.00007	0.865789	2.18695	1.1021	1.32993	0.0151928	2.36381	0.722992	0.738449	0.717566	1.78479	1.16615	MM10000000003015923	0.991835	NA	NA	yes	yes	yes	no	yes	no	no	yes	no	Gm11939 (+657)	KRTAP3-2 (-4253)	0.193052	yes	-0.0633771	yes	0.773009
chr11	100071736	100072236	mm10_chr11.100071736.100072236	2.46187	2.6e-11	1.08021	1.07603	1.79565	0.980549	1.35239	0.865764	2.56668	0.0387936	1	0.904699	1.61373	1.20677	MM10000000003018488	0.964356	NA	0.999874	yes	yes	yes	yes	yes	no	no	no	NA	Krt32 (+16240)	NA	0.023778	no	-0.125339	no	1.51128
chr11	108160095	108160595	mm10_chr11.108160095.108160595	3.96336	3.16e-32	3.35304	2.88058	1.51159	2.67811	2.98077	2.56996	2.44061	2.59642	2.42047	2.18884	1.22116	2.44014	MM10000000003058930	0.999184	NA	NA	yes	yes	yes	yes	yes	yes	yes	yes	no	Prkca (+183583)	PRKCA (+227131)	0.259516	yes	0.836223	yes	2.36789
chr11	108631161	108631661	mm10_chr11.108631161.108631661	1.89874	0.00433019	0.72327	1.42974	1.18593	0.450632	0.57659	0.807663	1.24205	1.39242	0.709178	1.12632	0.973209	0.965182	MM10000000003061286	0.888386	NA	NA	no	yes	yes	no	no	yes	no	no	NA	Cep112 (+206145)	NA	0.049508	no	0.134638	no	-0.565657
chr11	108936397	108936897	mm10_chr11.108936397.108936897	1.67502	0.00269845	1.53037	2.45678	0.508103	1.41341	1.65258	2.90535	0.552528	2.08973	1.27369	2.11123	0.220674	1.5195	MM10000000003062812	0.985165	NA	NA	yes	yes	yes	yes	yes	no	no	yes	no	Axin2 (+16298)	AXIN2 (+16855)	0.78677	yes	1.12798	no	-0.403172
chr11	109091749	109092249	mm10_chr11.109091749.109092249	1.92823	8.76e-08	1.04075	2.04131	1.2593	1.15599	1.15936	1.52314	2.00356	2.11352	0.773122	1.44692	1.05838	1.41594	MM10000000003063588	0.986163	0.999931	0.997158	yes	yes	yes	yes	yes	yes	yes	yes	no	E030025P04Rik (+52370)	AXIN2 (+182025)	0.180504	yes	0.208894	yes	1.37397
chr11	109092072	109092572	mm10_chr11.109092072.109092572	1.92823	8.76e-08	0.906477	1.49075	1.37896	0.0832804	0.555909	1.32493	2.19522	1.85286	0.800734	1.47003	1.1472	1.20058	MM10000000003063590	0.996603	NA	0.989745	yes	yes	yes	yes	yes	yes	yes	yes	no	E030025P04Rik (+52047)	AXIN2 (+182336)	0.408998	yes	-0.0323595	yes	0.850424
chr11	110176879	110177379	mm10_chr11.110176879.110177379	2.82626	2.68e-09	0.843106	1.18939	0.780248	0.295489	0.396799	0.381792	0.977931	1.0335	0.63018	1.0287	0.769005	0.756922	MM10000000003069014	0.944288	NA	NA	yes	yes	yes	yes	yes	yes	yes	yes	no	Abca9 (-8933)	ABCA9 (-18048)	0.254246	no	0.24253	yes	1.01652
chr11	110450337	110450837	mm10_chr11.110450337.110450837	1.67618	0.00501002	1.60828	1.03019	0.0955498	1.1064	1.09433	1.7208	0.610843	0.46216	1.15789	1.00871	0.045234	0.903672	MM10000000003070381	0.944138	NA	NA	yes	yes	yes	no	yes	no	no	no	NA	Map2k6 (+51465)	NA	0.017942	no	0.762559	yes	-0.152407
chr11	113060911	113061411	mm10_chr11.113060911.113061411	2.09363	1.7e-05	2.09093	0.963678	0.298939	0.99751	1.10929	0.737528	1.69843	1.99355	1.4613	0.830646	0.307816	1.13542	MM10000000003083434	0.966717	NA	NA	yes	yes	yes	no	yes	no	no	yes	no	Sox9 (+278937)	SOX9 (+300356)	0.247226	yes	0.679089	no	-0.155225
chr11	113910172	113910672	mm10_chr11.113910172.113910672	2.03837	5.98e-12	1.93054	0.975841	1.63517	0.180447	1.00457	0.680548	1.39696	1.19919	1.49363	0.979992	1.47077	1.17706	MM10000000003087681	0.982061	NA	0.998631	yes	yes	yes	yes	yes	no	no	yes	no	Sdk2 (+155796)	SDK2 (+163640)	0.074638	yes	0.813106	no	-0.222486
chr11	115072946	115073446	mm10_chr11.115072946.115073446	1.99747	0.000130621	0.999818	1.75433	1.20806	0.23288	0.515407	0.671434	2.05646	1.71106	0.806783	1.50757	0.995993	1.13271	MM10000000003093494	NA	NA	NA	yes	yes	yes	no	yes	yes	no	yes	no	Cd300e (-11019)	CD300E (-26828)	0.06105	no	0.210442	yes	-0.96541
chr12	5504110	5504610	mm10_chr12.5504110.5504610	2.63656	8.66e-14	3.04319	3.06512	0.858166	1.96641	1.90999	2.28886	1.45302	1.06949	2.31641	2.38634	0.585944	1.9039	MM10000000001945010	0.978512	NA	0.997278	yes	yes	yes	yes	yes	yes	yes	yes	no	Klhl29 (-128678)	KLHL29 (-107143)	0.479982	yes	0.945819	no	0.842843
chr12	8908791	8909291	mm10_chr12.8908791.8909291	2.55272	9.78e-11	1.94025	1.3783	1.70543	1.9255	1.97956	1.65788	2.94621	0.934096	1.54893	1.2107	1.29034	1.68338	MM10000000001962034	0.998499	NA	0.996899	yes	yes	yes	yes	yes	yes	yes	yes	no	Laptm4a (-12623)	LAPTM4A (-21655)	0.0390661	no	0.927253	no	0.092691
chr12	10687663	10688163	mm10_chr12.10687663.10688163	1.60464	0.00303267	1.38994	1.92185	0.690331	1.29709	1.73458	2.35302	0.403112	1.31269	0.999946	1.60453	0.534088	1.29465	MM10000000001970928	0.998016	NA	NA	yes	yes	yes	yes	yes	yes	yes	yes	no	Rdh14 (+297141)	RDH14 (+281499)	0.047326	yes	0.11762	no	-0.123758
chr13	89394651	89395151	mm10_chr13.89394651.89395151	3.58198	2.8e-17	2.16888	3.83544	0.112197	3.52414	3.59534	4.5859	1.68828	0.807256	1.45424	3.00341	0.435836	2.2919	MM10000000001762360	0.996599	NA	NA	yes	yes	yes	yes	yes	yes	yes	yes	yes	Hapln1 (-144895)	HAPLN1 (-156790)	0.267612	yes	0.774888	yes	0.246287
chr12	12371454	12371954	mm10_chr12.12371454.12371954	1.76084	8.76e-06	1.25698	0.694186	2.77738	0.366649	0.895785	0.31268	2.47514	0.413573	0.999999	0.55212	2.04323	1.16252	MM10000000001979347	0.911294	NA	0.999607	no	yes	yes	no	yes	no	no	yes	no	Fam49a (+109565)	FAM49A (+111815)	-0.05079	no	-0.0259902	yes	-0.215412
chr12	13683854	13684354	mm10_chr12.13683854.13684354	1.93438	0.00121745	1.695	1.97328	0.217793	1.56772	1.59346	1.53366	1.31243	1.66027	1.18338	1.75247	0.172943	1.33295	MM10000000001985909	0.837859	NA	0.988263	yes	yes	yes	yes	no	yes	no	yes	no	Nbas (+414971)	NBAS (+492155)	0.163574	yes	0.261936	yes	0.701836
chr12	14103351	14103851	mm10_chr12.14103351.14103851	3.3291	9.48e-36	1.61833	4.47535	0.153612	3.39266	2.92613	4.19954	1.16532	0.782528	1.23855	3.45027	0.130311	2.13933	MM10000000001988007	0.983833	NA	NA	yes	yes	yes	yes	yes	yes	yes	yes	no	Fam84a (+48453)	NBAS (+887629)	0.366146	yes	0.652052	yes	0.394254
chr12	16425039	16425539	mm10_chr12.16425039.16425539	2.21955	4.94e-07	0.879943	1.85329	0.477278	1.53794	1.31267	1.81931	0.811107	2.34605	0.551435	1.26909	0.410545	1.20624	MM10000000001999615	0.997089	NA	NA	yes	yes	yes	yes	yes	yes	yes	yes	no	Lpin1 (+164481)	LPIN1 (+319287)	0.359018	yes	0.342134	yes	1.31311
chr12	16499317	16499817	mm10_chr12.16499317.16499817	2.09134	0.00101976	1.75666	2.01697	2.38941	1.20513	1.22654	1.7599	2.47764	1.2538	1.50013	1.79505	2.0581	1.76721	MM10000000001999986	0.936181	NA	0.993305	yes	yes	yes	yes	yes	yes	yes	yes	no	Lpin1 (+90203)	LPIN1 (+200375)	0.273624	no	0.913962	no	1.11173
chr12	27915273	27915773	mm10_chr12.27915273.27915773	2.73364	9.82e-14	2.20902	2.37313	3.06571	1.5584	1.72733	2.08603	4.36399	2.06857	1.49892	1.88868	2.49907	2.30353	MM10000000002057066	0.982857	NA	0.999371	yes	yes	yes	yes	yes	yes	yes	yes	no	Sox11 (-572949)	SOX11 (-776170)	-0.0450944	no	1.03363	yes	2.51439
chr12	30272790	30273290	mm10_chr12.30272790.30273290	2.75274	1.77e-07	0.877284	3.08822	0.772746	0.643813	0.415014	1.15984	1.0894	1.41723	0.616005	2.15352	0.530952	1.16037	MM10000000002068854	NA	NA	NA	no	yes	yes	yes	yes	yes	yes	yes	no	Sntg2 (+100335)	SNTG2 (+219292)	0.013672	yes	0.00183562	no	0.280595
chr12	31218759	31219259	mm10_chr12.31218759.31219259	3.13258	3.26e-20	1.58278	1.99927	2.23772	1.72672	1.93245	2.41917	2.67121	1.62693	1.01926	1.42599	1.45105	1.8266	MM10000000002073584	0.964712	NA	0.996511	yes	yes	yes	yes	yes	yes	yes	yes	no	ENSMUSG00000112187 (-21761)	LAMB1 (-48283)	0.054908	no	0.404059	yes	1.02943
chr12	32791701	32792201	mm10_chr12.32791701.32792201	1.83845	0.00176991	1.47494	1.22546	0.947142	0.329939	0.577035	0.594571	1.80244	0.568985	1.14614	0.989913	0.783651	0.949111	MM10000000002081448	0.872031	NA	0.991926	yes	yes	yes	yes	yes	yes	yes	no	NA	Nampt (-28384)	NA	0.079492	yes	0.77568	no	1.38515
chr12	32792029	32792529	mm10_chr12.32792029.32792529	1.83845	0.00176991	1.29009	2.74864	1.23797	2.17389	2.67867	2.96023	1.81419	2.16996	1.00003	2.12799	0.996158	1.92707	MM10000000002081450	0.992227	0.998779	0.982043	yes	yes	yes	yes	yes	yes	yes	no	NA	Nampt (-28056)	NA	0.094176	yes	0.508193	no	0.797861
chr12	33222143	33222643	mm10_chr12.33222143.33222643	1.91919	0.00404589	1.27421	2.00775	1.10872	1.62875	1.75485	1.71417	1.87276	0.859183	1.14161	1.57062	1.04696	1.45269	MM10000000002083600	0.9334	NA	NA	yes	yes	yes	yes	yes	yes	yes	yes	no	Atxn7l1 (-80122)	ATXN7L1 (+93786)	0.169562	yes	0.913455	no	0.448549
chr12	33271745	33272245	mm10_chr12.33271745.33272245	2.66502	6.33e-08	1.28548	2.74388	1.87356	1.8838	1.85399	1.60767	2.57624	1.46055	0.999937	2.13229	1.4141	1.80286	MM10000000002083848	0.934531	NA	NA	yes	yes	yes	yes	yes	no	no	yes	no	Atxn7l1 (-30520)	EFCAB10 (-146737)	0.238098	no	0.108345	no	1.23705
chr12	34229744	34230244	mm10_chr12.34229744.34230244	1.96481	0.000248285	1.04569	2.26294	2.18661	2.45507	2.38357	1.9194	1.427	1.39398	0.902023	1.52931	1.61251	1.73801	MM10000000002088638	0.97753	NA	NA	yes	yes	yes	yes	yes	yes	yes	yes	no	Twist1 (+272323)	TWIST1 (+299403)	0.240524	no	0.433718	no	0.452115
chr12	35770575	35771075	mm10_chr12.35770575.35771075	2.07351	2.45e-10	2.17698	1.52986	1.48007	1.24734	1.40615	1.03057	1.3942	0.124353	1.5967	1.41611	1.00385	1.30965	MM10000000002096343	0.929379	NA	0.999434	no	no	no	no	no	no	no	yes	no	Agr3 (-154795)	AGR3 (-134196)	0.469332	yes	0.516114	yes	1.00843
chr12	35771154	35771654	mm10_chr12.35771154.35771654	2.07351	2.45e-10	0.761231	1.16896	3.36047	2.51881	2.25425	1.19711	3.841	3.83663	0.374452	0.840579	2.42492	2.05258	MM10000000002096346	0.90663	NA	0.993229	yes	yes	yes	yes	yes	yes	yes	yes	no	Agr3 (-154216)	AGR3 (-133430)	0.112962	yes	-0.0155772	yes	0.879019
chr12	40294682	40295182	mm10_chr12.40294682.40295182	2.49151	4.86e-09	1.29142	2.20276	0.152793	2.05303	1.89846	2.24952	1.6626	0.495504	1.0069	1.86786	0.0002348	1.35283	MM10000000002118963	0.966099	NA	0.9867	yes	yes	yes	yes	yes	yes	yes	no	NA	Ifrd1 (-71743)	NA	0.1776	yes	0.437983	no	1.30972
chr12	40301071	40301571	mm10_chr12.40301071.40301571	2.25677	1.64e-05	0.829319	0.753679	1.78232	1.20401	1.02228	1.02571	2.8415	1.3543	0.602471	0.664388	1.20264	1.20751	MM10000000002118995	0.942798	NA	0.996728	yes	yes	yes	yes	yes	yes	yes	yes	no	Ifrd1 (-78132)	IFRD1 (-93312)	0.17758	no	-0.0705588	no	1.61619
chr12	40318411	40318911	mm10_chr12.40318411.40318911	1.81529	0.00157835	1.12683	1.00349	1.63263	1.05179	1.28305	1.32163	3.08432	1.13085	0.999856	1.01453	1.4366	1.37142	MM10000000002119082	0.988869	NA	0.989479	yes	yes	yes	yes	yes	yes	yes	yes	no	Ifrd1 (-95472)	IFRD1 (-110846)	0.447788	yes	0.142023	no	1.01514
chr12	51937848	51938348	mm10_chr12.51937848.51938348	2.11251	0.00516481	2.04225	1.1416	2.44576	1.4552	1.71741	0.858776	2.9477	0.286874	1.46826	0.855778	2.17519	1.58135	MM10000000002177179	0.95314	NA	0.999083	yes	no	no	yes	no	no	no	yes	no	Heatr5a (+33223)	ENSG00000203546 (+85558)	0.419362	yes	0.559098	yes	1.22939
chr12	52439153	52439653	mm10_chr12.52439153.52439653	2.18406	3.28e-05	0.502083	1.3695	1.82531	0.866785	1.20539	1.21425	2.72357	1.21999	0.423048	0.940617	1.40158	1.24474	MM10000000002179686	0.996001	NA	0.994698	yes	yes	yes	yes	yes	yes	yes	yes	no	Arhgap5 (-64613)	ARHGAP5 (-65624)	0.30454	yes	0.140129	yes	-0.0473165
chr12	52488251	52488751	mm10_chr12.52488251.52488751	2.4223	2.2e-10	2.3387	3.81988	2.36037	3.44998	3.57505	3.37097	3.09072	3.4812	1.72196	3.21497	1.9144	2.93984	MM10000000002179931	0.999904	NA	0.996971	yes	yes	yes	yes	yes	yes	yes	yes	no	Arhgap5 (-15515)	ARHGAP5 (-17922)	0.605356	yes	0.865717	yes	2.03938
chr12	52488384	52488884	mm10_chr12.52488384.52488884	2.4223	2.2e-10	2.72408	3.30801	1.6792	3.06777	3.28855	3.13862	2.49001	1.59231	2.21291	2.81568	1.52248	2.53087	MM10000000002179932	0.998494	NA	0.993148	yes	yes	yes	yes	yes	yes	yes	yes	no	Arhgap5 (-15382)	ARHGAP5 (-17788)	0.413724	yes	1.39263	yes	1.73326
chr12	52639016	52639516	mm10_chr12.52639016.52639516	2.40102	4.38e-05	0.961192	2.1383	1.3141	1.03881	1.02909	0.894107	2.27583	2.11911	0.590466	1.41012	0.990835	1.342	MM10000000002180685	0.773961	NA	0.995053	yes	yes	yes	yes	yes	yes	yes	yes	no	Akap6 (-60117)	AKAP6 (-73335)	0.646	no	0.16481	no	-0.296635
chr12	54214400	54214900	mm10_chr12.54214400.54214900	2.15388	0.000109658	1.81828	1.96745	0.847864	1.06943	1.10512	1.93224	2.69088	0.995372	1.6306	1.84956	0.803728	1.51914	MM10000000002188562	NA	NA	NA	yes	yes	yes	yes	yes	no	no	no	NA	Egln3 (-10790)	NA	0.076978	yes	0.939303	no	0.107975
chr12	54652420	54652920	mm10_chr12.54652420.54652920	2.06364	3.36e-06	2.43334	2.48185	1.24976	3.07579	3.40394	2.76349	1.57065	1.58203	1.95147	2.1791	1.09318	2.16224	MM10000000002190752	0.997388	NA	0.981588	yes	yes	yes	yes	yes	yes	yes	yes	no	Sptssa (+3903)	SPTSSA (+8916)	0.156892	yes	1.4364	yes	1.25885
chr12	58950903	58951403	mm10_chr12.58950903.58951403	2.37168	3.51e-06	0.982718	1.77424	0.69517	1.03234	0.990507	1.1856	1.31206	1.94876	0.643216	1.55181	0.287801	1.12766	MM10000000002212244	0.966424	NA	0.983283	yes	yes	yes	yes	yes	yes	yes	yes	no	Sec23a (+60864)	SEC23A (+79807)	0.145466	no	0.23077	no	0.625013
chr12	73779168	73779668	mm10_chr12.73779168.73779668	1.70425	0.00241035	3.26265	3.19244	1.85226	2.98876	3.07338	3.10433	2.95842	2.00109	2.41831	2.66369	1.27834	2.61761	MM10000000002286386	NA	NA	0.988471	yes	yes	yes	yes	yes	yes	yes	yes	no	Hif1a (-128486)	ENSG00000258989 (+23945)	0.09629	yes	0.820336	no	0.693558
chr12	73781366	73781866	mm10_chr12.73781366.73781866	1.91564	0.00400006	0.567498	0.964227	1.21773	0.347544	0.398605	0.734722	1.15339	2.75814	0.539264	0.881807	0.654397	0.928848	MM10000000002286397	0.468693	NA	NA	yes	yes	yes	yes	yes	yes	yes	yes	no	Hif1a (-126288)	ENSG00000258989 (+26636)	0.132784	no	0.188069	no	-0.347844
chr12	73781629	73782129	mm10_chr12.73781629.73782129	1.91564	0.00400006	1.00023	1.15613	0.948897	0.72493	0.768345	0.678125	0.464398	0.0290286	0.999826	1.03188	0.624862	0.766059	MM10000000002286398	0.958789	NA	NA	no	yes	yes	yes	yes	yes	yes	yes	no	Hif1a (-126025)	ENSG00000258989 (+26803)	-0.031546	no	0.683375	no	0.0704421
chr12	74357509	74358009	mm10_chr12.74357509.74358009	2.23826	0.00286812	1.99653	2.61333	1.67332	3.11201	3.77594	3.48575	1.84081	0.0173935	1.48139	2.07778	1.40877	2.13482	MM10000000002289277	NA	NA	NA	yes	yes	yes	yes	yes	no	no	yes	no	Gm11042 (-41365)	SYT16 (+220263)	0.085006	no	-0.109156	no	1.33192
chr12	74357727	74358227	mm10_chr12.74357727.74358227	2.23826	0.00286812	1.4848	2.03902	0.564096	1.73936	2.39068	2.28474	0.211655	1.74296	1.16517	1.69833	0.382927	1.42761	MM10000000002289278	0.991926	NA	NA	no	yes	yes	yes	yes	no	no	yes	no	Gm11042 (-41583)	SYT16 (+220263)	0.079356	no	0.410758	no	0.625305
chr12	75100564	75101064	mm10_chr12.75100564.75101064	2.70411	7.06e-17	1.41676	1.92049	1.4955	1.83197	1.72486	2.00837	1.1493	1.80782	1.12425	1.65904	1.00096	1.55812	MM10000000002292993	0.796334	NA	0.990639	yes	yes	yes	yes	yes	yes	yes	yes	no	Kcnh5 (+76518)	KCNH5 (+78690)	0.05838	no	0.369733	no	1.00691
chr12	76148164	76148664	mm10_chr12.76148164.76148664	2.31063	0.00461239	1.63385	1.79368	1.11997	2.26979	2.23215	1.76768	1.85758	0.738774	1.32585	1.31025	0.925746	1.54321	MM10000000002298231	0.989317	NA	NA	yes	yes	yes	yes	yes	yes	yes	no	NA	Esr2 (+28845)	NA	0.174415	yes	0.864893	no	0.776124
chr12	76302528	76303028	mm10_chr12.76302528.76303028	1.73117	0.00361466	1.35945	1.53032	1.44594	1.12737	1.38373	1.46693	0.98346	0.0882488	0.999955	1.22254	1.00785	1.14689	MM10000000002299002	0.982043	NA	NA	yes	yes	yes	yes	yes	no	no	yes	no	Akap5 (-22113)	AKAP5 (-24434)	0.206844	no	0.57108	no	0.153505
chr12	76486811	76487311	mm10_chr12.76486811.76487311	2.96337	1.39e-09	1.04011	1.25808	0.239224	0.762041	0.970283	1.27798	0.726786	3.79459	0.91702	1.20647	0.173508	1.12419	MM10000000002299924	0.996159	NA	NA	yes	yes	yes	yes	yes	yes	yes	no	NA	Plekhg3 (-46319)	NA	0.134308	no	0.421374	no	-0.584773
chr12	77638200	77638700	mm10_chr12.77638200.77638700	2.13824	4.36e-10	1.62271	2.11134	2.36648	1.59782	1.75882	1.5007	2.8234	1.36602	1.32141	1.43462	1.67308	1.77967	MM10000000002305681	0.988775	NA	0.994823	yes	yes	yes	yes	yes	yes	yes	yes	no	Fut8 (+399385)	FUT8 (+509968)	0.36419	yes	0.749227	yes	1.2896
chr12	77869300	77869800	mm10_chr12.77869300.77869800	1.60139	0.00154064	0.168838	1.51789	1.56703	1.13933	1.14054	0.827216	1.39254	2.66188	0.00411968	0.844258	1.09241	1.12328	MM10000000002306836	0.926878	NA	NA	yes	yes	yes	yes	no	yes	no	yes	no	Gm6657 (-324692)	GPHN (-350524)	0.105776	yes	-0.248003	no	-0.0858342
chr12	79759401	79759901	mm10_chr12.79759401.79759901	2.18438	0.000442468	0.457485	1.40898	1.76056	1.59008	1.79416	1.6852	1.77987	4.63008	0.443456	0.899303	1.41675	1.62417	MM10000000002316287	0.999205	NA	NA	yes	yes	yes	yes	yes	yes	yes	yes	no	Zfp36l1 (+353362)	ZFP36L1 (+391383)	0.605022	no	0.414598	no	0.673313
chr12	79986641	79987141	mm10_chr12.79986641.79987141	1.6621	0.00933688	1.56761	1.47185	0.250089	1.3708	1.52313	1.95142	0.653682	1.41677	1.25498	1.14905	0.172334	1.16197	MM10000000002317423	0.99057	NA	0.989169	yes	yes	yes	yes	yes	no	no	yes	no	Zfp36l1 (+126122)	ZFP36L1 (+140990)	0.312818	yes	0.701097	no	0.264537
chr12	81758801	81759301	mm10_chr12.81758801.81759301	2.71954	1.91e-09	1.62655	2.34774	2.76986	2.2713	2.23478	2.31357	2.86857	1.06588	1.3939	1.91825	1.86221	2.06115	MM10000000002326284	0.979807	NA	0.994725	yes	yes	yes	yes	yes	no	no	no	NA	Map3k9 (+22124)	NA	0.032694	no	1.03916	yes	0.677093
chr12	81844878	81845378	mm10_chr12.81844878.81845378	1.97312	0.000727151	1.42141	0.807313	0.760413	0.0636236	0.52964	0.629269	1.87385	1.01297	1.11996	0.704956	0.500422	0.856712	MM10000000002326714	0.959961	NA	NA	yes	yes	yes	yes	yes	yes	yes	yes	no	Pcnx (-14902)	PCNX1 (-16103)	0.317906	yes	0.435206	no	-1.01351
chr12	82304122	82304622	mm10_chr12.82304122.82304622	2.36543	2.12e-10	1.65775	3.37114	1.86822	3.4219	3.35739	3.0084	2.23978	1.54073	1.28696	2.78462	1.43766	2.36132	MM10000000002329010	0.968353	NA	NA	yes	yes	yes	yes	yes	yes	yes	yes	no	Sipa1l1 (+134952)	SIPA1L1 (-14317)	0.26523	yes	0.914675	yes	0.528173
chr12	83260467	83260967	mm10_chr12.83260467.83260967	1.83052	0.00483285	1.00006	1.2086	1.78525	0.612353	0.736108	0.810495	1.02813	0.354917	0.999996	1.0465	1.32207	0.991316	MM10000000002333792	0.8407	NA	0.996499	yes	yes	yes	yes	no	yes	no	yes	no	Dpf3 (+226999)	DPF3 (+229972)	0.706032	no	1.02971	no	0.575259
chr12	83352554	83353054	mm10_chr12.83352554.83353054	3.60643	3.73e-12	2.61103	4.46355	0.989703	2.49822	3.12351	3.60759	2.36529	2.60115	1.96705	3.47272	0.648277	2.5771	MM10000000002334253	0.996971	NA	NA	yes	yes	yes	yes	yes	yes	yes	no	NA	Dpf3 (+134912)	NA	0.041048	yes	1.32148	yes	0.615483
chr12	83744239	83744739	mm10_chr12.83744239.83744739	3.1507	0.000184036	0.742822	1.0712	2.47138	1.11965	1.15496	0.996418	3.05041	0.61665	0.706512	0.904404	1.75295	1.32612	MM10000000002336211	0.890918	NA	0.998715	yes	yes	yes	yes	yes	yes	yes	no	NA	Papln (-19145)	NA	0.083954	no	0.320345	no	1.04058
chr12	85523712	85524212	mm10_chr12.85523712.85524212	3.25487	1.45e-08	1.14183	2.29137	2.3959	0.897336	0.995695	1.25422	2.81934	1.74868	0.995724	1.96825	1.9599	1.67893	MM10000000002345108	0.989974	NA	NA	yes	yes	yes	yes	yes	yes	yes	yes	no	Fos (+50072)	FOS (+56112)	0.224438	no	0.10431	no	-0.532619
chr12	85523985	85524485	mm10_chr12.85523985.85524485	NA	NA	1.73528	2.37334	1.00197	0.591434	0.741961	0.990879	2.11551	1.01347	1.01426	1.76913	0.716829	1.27855	MM10000000002345110	NA	NA	NA	no	yes	yes	yes	yes	yes	yes	yes	no	Fos (+50345)	FOS (+56470)	0.105594	no	-0.0131219	no	1.27925
chr12	85563257	85563757	mm10_chr12.85563257.85563757	2.13778	9.31e-07	1.27783	2.29252	2.00644	1.38097	1.3021	1.062	1.78772	1.25551	1.00004	1.81837	1.50178	1.51684	MM10000000002345306	0.980742	NA	0.998473	yes	yes	yes	no	yes	yes	no	yes	no	Jdp2 (-35520)	JDP2 (-51560)	0.18006	no	0.210386	no	-0.294755
chr12	87343165	87343665	mm10_chr12.87343165.87343665	2.67965	1.53e-11	1.73776	2.09084	0.716007	1.6842	1.74812	1.54333	1.76223	0.068703	1.23931	1.69307	0.607017	1.35369	MM10000000002354206	0.994477	NA	NA	yes	yes	yes	yes	yes	yes	yes	yes	no	Ism2 (-43710)	ISM2 (-58957)	0.008474	yes	0.527272	no	0.712936
chr12	88536229	88536729	mm10_chr12.88536229.88536729	2.43002	3.43e-09	0.651209	2.08019	1.04337	0.723737	0.477461	0.715553	1.33758	3.03509	0.45498	1.5462	0.725271	1.16279	MM10000000002360171	0.954927	NA	0.992793	yes	yes	yes	yes	yes	yes	yes	no	NA	Adck1 (+175831)	NA	0.053306	yes	-0.16775	no	1.40452
chr12	89316513	89317013	mm10_chr12.89316513.89317013	2.53692	2.45e-07	0.345173	2.76074	0.926663	0.963759	1.05475	2.45572	1.43223	1.14957	0.122094	1.99568	0.621142	1.25705	MM10000000002364072	0.948638	NA	NA	yes	yes	yes	yes	yes	no	no	yes	no	Nrxn3 (+522259)	NRXN3 (+530054)	-0.00774	no	-0.536756	no	0.406131
chr12	89824997	89825497	mm10_chr12.89824997.89825497	2.27106	0.000322896	1.61456	2.54495	1.31119	1.61408	1.60746	1.90552	1.7919	0.62227	1.08196	2.16259	1.26174	1.59257	MM10000000002366615	0.968043	NA	0.996143	yes	yes	yes	yes	yes	no	no	yes	no	Dio2 (+913191)	DIO2 (+917640)	0.610464	yes	-0.316899	yes	1.83315
chr12	95418861	95419361	mm10_chr12.95418861.95419361	2.36412	1.55e-08	1.86779	3.40914	0.278681	2.9332	3.07688	3.89667	1.13733	2.04415	1.18925	2.72451	0.0410617	2.05442	MM10000000002394584	0.997278	NA	NA	yes	yes	yes	yes	yes	yes	yes	yes	no	Flrt2 (-273115)	FLRT2 (-261606)	0.0359375	no	-0.0139351	no	1.36297
chr12	97358566	97359066	mm10_chr12.97358566.97359066	1.82951	0.0073722	0.384542	0.64693	2.08858	0.844228	1.01121	1.08533	2.27885	2.43139	0.499737	0.591899	1.70696	1.23361	MM10000000002404283	0.507291	NA	0.998903	yes	yes	yes	yes	yes	yes	yes	yes	no	Galc (+900643)	GALC (+842871)	-0.077466	no	0.28072	no	0.619604
chr12	98683090	98683590	mm10_chr12.98683090.98683590	2.45535	2.59e-05	1.16623	2.58797	0.642636	0.811881	1.31523	2.27582	2.06172	1.05066	1.00029	2.06964	0.471194	1.40484	MM10000000002410905	0.981373	NA	0.991241	yes	yes	yes	yes	yes	yes	yes	yes	no	Ptpn21 (+51305)	PTPN21 (+81257)	0.108746	no	0.357789	no	0.129333
chr12	99715958	99716458	mm10_chr12.99715958.99716458	2.39265	3.45e-23	2.38036	1.82794	2.46625	2.80674	2.73502	2.28201	3.30172	1.26233	1.81367	1.58557	1.90027	2.21472	MM10000000002416070	0.999977	NA	0.999631	yes	yes	yes	yes	yes	yes	yes	yes	no	Efcab11 (+167234)	EFCAB11 (+161347)	0.245728	yes	0.822218	yes	0.745406
chr12	103057792	103058292	mm10_chr12.103057792.103058292	1.75997	0.00477126	2.00397	2.4693	1.18498	1.11022	1.13609	1.46823	2.069	0.561944	1.26379	1.96118	1.00449	1.47574	MM10000000002432779	0.962076	NA	0.999718	yes	yes	yes	yes	yes	no	no	no	NA	Unc79 (+109183)	NA	0.042176	no	0.869875	no	-0.165074
chr12	103355606	103356106	mm10_chr12.103355606.103356106	2.26428	4.17e-07	1.37969	1.07374	0.459388	0.935032	0.963956	0.959856	1.15272	2.47936	1.16097	1.02277	0.509046	1.09968	MM10000000002434268	0.99053	NA	0.998122	yes	yes	yes	no	yes	yes	no	yes	no	Asb2 (+145)	ASB2 (+181)	0.421496	yes	0.58297	no	-0.629803
chr12	104693278	104693778	mm10_chr12.104693278.104693778	1.96484	3.96e-06	0.427838	0.817424	1.32289	0.364657	0.514467	0.433832	1.28366	1.33685	0.36901	0.683296	1.05287	0.782436	MM10000000002440956	NA	NA	NA	no	no	no	no	no	no	no	yes	no	Dicer1 (+58424)	DICER1 (+65311)	-0.189442	yes	-0.303759	no	0.275959
chr12	106210926	106211426	mm10_chr12.106210926.106211426	2.33072	1.53e-08	1.35345	0.888519	1.46269	0.968318	1.01916	0.638529	2.64023	0.108582	1.07992	0.904979	1.17732	1.11288	MM10000000002448544	0.861967	0.995347	0.998634	yes	yes	yes	no	yes	no	no	no	NA	Vrk1 (+180459)	NA	0.042232	yes	0.55965	yes	2.07065
chr12	106687725	106688225	mm10_chr12.106687725.106688225	1.68828	0.00553628	1.14191	2.24116	1.44973	1.77003	1.94802	2.06263	2.07653	0.874289	0.999779	1.53814	1.21792	1.57456	MM10000000002450928	0.932679	NA	0.980248	yes	yes	yes	no	no	no	no	yes	no	Vrk1 (+657258)	VRK1 (+837702)	0.834196	no	0.320441	no	0.28032
chr12	107391981	107392481	mm10_chr12.107391981.107392481	1.7499	0.00755437	1.26799	2.06881	1.37636	1.25467	1.55061	1.22629	2.62894	2.57953	1.03612	1.68624	1.08224	1.61435	MM10000000002454450	0.997175	NA	0.994401	yes	yes	yes	no	yes	yes	no	yes	no	3110018I06Rik (-96401)	BCL11B (+775390)	0.008742	no	0.370887	no	0.347208
chr12	107440506	107441006	mm10_chr12.107440506.107441006	1.93699	0.000221823	0.663111	1.32802	0.645837	0.269589	0.428194	0.299102	1.28863	0.358895	0.562975	1.01326	0.577103	0.675883	MM10000000002454692	NA	NA	NA	no	yes	yes	yes	yes	no	no	yes	no	3110018I06Rik (-47876)	BCL11B (+718527)	0.000193999	yes	0.560734	yes	0.78187
chr12	107903994	107904494	mm10_chr12.107903994.107904494	1.60775	0.00531268	2.1192	2.1243	1.69883	0.98876	1.34082	1.08155	1.65754	0.233047	1.70837	1.70237	1.12185	1.43424	MM10000000002457010	0.999024	NA	0.997975	yes	yes	yes	no	yes	no	no	yes	no	Bcl11b (+99358)	BCL11B (+109384)	0.05205	yes	0.811981	yes	0.360595
chr12	108997182	108997682	mm10_chr12.108997182.108997682	2.39002	1.15e-08	2.02349	1.2663	0.959191	1.45153	1.75244	2.02209	2.30478	0.235874	1.65965	1.21982	0.910661	1.43689	MM10000000002462476	0.99899	NA	0.997277	yes	yes	yes	yes	yes	yes	yes	yes	no	Begain (+70785)	BEGAIN (+78383)	0.132884	yes	0.906663	no	-0.210263
chr12	109566714	109567214	mm10_chr12.109566714.109567214	2.94092	1.54e-24	0.760051	2.18151	0.607177	0.983607	0.863539	1.20537	0.756493	0.00660477	0.489344	1.58413	0.283941	0.883797	MM10000000002465323	0.883159	NA	NA	yes	yes	yes	yes	yes	no	no	yes	no	Rtl1 (+33366)	RTL1 (+29077)	0.149944	yes	-0.362107	no	-0.349311
chr12	109566916	109567416	mm10_chr12.109566916.109567416	2.94092	1.54e-24	2.37811	3.87834	0.635829	3.07314	3.37576	3.72162	1.67728	0.334337	1.63266	2.97222	0.312705	2.18109	MM10000000002465324	0.999709	NA	0.983424	yes	yes	yes	yes	yes	no	no	yes	no	Rtl1 (+33164)	RTL1 (+28879)	0.083656	yes	0.990775	no	-0.195758
chr12	111243363	111243863	mm10_chr12.111243363.111243863	3.58824	6.85e-16	2.50374	2.98729	1.25833	3.5818	4.00834	3.17556	1.63034	0.438466	1.71494	2.58593	0.783495	2.24257	MM10000000002473707	0.99983	NA	NA	yes	yes	yes	yes	yes	no	no	yes	no	Amn (-27482)	AMN (-45375)	0.316024	no	0.601357	no	1.09842
chr12	116784445	116784945	mm10_chr12.116784445.116784945	2.89583	6.56e-10	1.35564	3.44833	2.21902	2.4334	2.33816	2.60337	3.50582	2.39746	1.00002	2.77296	1.67696	2.34101	MM10000000002501412	0.991336	NA	NA	yes	yes	yes	yes	yes	yes	yes	no	NA	Ptprn2 (+298862)	NA	0.043744	yes	0.479747	no	0.6295
chr12	117512899	117513399	mm10_chr12.117512899.117513399	2.53357	1.71e-09	1.86524	3.15045	1.14919	1.98108	2.00544	2.12346	1.94305	1.32944	1.36971	2.37551	0.729848	1.82022	MM10000000002505054	0.996598	NA	0.989608	yes	yes	yes	yes	yes	yes	yes	yes	no	Rapgef5 (-3330)	RAPGEF5 (-21251)	0.190972	yes	0.734446	yes	0.600068
chr12	117513110	117513610	mm10_chr12.117513110.117513610	2.53357	1.71e-09	1.30561	1.86266	0.679071	0.507374	0.792121	0.898777	1.26137	0.845643	1.26702	1.61199	0.761886	1.07214	MM10000000002505055	0.998066	NA	0.985009	yes	yes	yes	yes	yes	yes	yes	yes	no	Rapgef5 (-3119)	RAPGEF5 (-21031)	0.240942	yes	1.02826	yes	1.66914
chr12	119385459	119385959	mm10_chr12.119385459.119385959	2.13024	0.00290126	0.557591	0.61414	0.676835	0.582829	0.623278	1.13441	2.09775	1.04028	0.514116	0.549783	0.734645	0.829605	MM10000000002514417	0.97209	NA	0.99337	yes	yes	yes	yes	yes	yes	yes	yes	no	Macc1 (-6874)	MACC1 (-3856)	0.224676	no	-0.0825304	no	0.964931
chr12	119385688	119386188	mm10_chr12.119385688.119386188	2.13024	0.00290126	1.08344	1.50668	1.28443	0.488861	0.513778	0.767676	2.68269	2.43685	0.704442	1.0868	0.974264	1.22999	MM10000000002514418	0.983893	NA	NA	no	yes	yes	yes	yes	yes	yes	yes	no	Macc1 (-6645)	MACC1 (-3607)	0.406024	no	-0.157747	no	1.40725
chr13	6985638	6986138	mm10_chr13.6985638.6986138	1.889	0.000461201	1.36465	2.94113	0.842956	0.244379	0.0892293	1.18146	0.575063	2.03784	1.00027	2.41689	0.684008	1.21617	MM10000000001350315	NA	0.999877	0.98459	no	yes	yes	yes	no	yes	no	yes	no	Pfkp (-337111)	PFKP (-249675)	0.03289	yes	-0.0583237	no	-0.145674
chr13	9078207	9078707	mm10_chr13.9078207.9078707	3.06537	5.3e-09	1.00014	2.84191	0.287033	2.3868	2.63213	2.59031	1.05558	2.55117	0.730536	2.08615	0.29797	1.67816	MM10000000001360778	0.974073	NA	NA	yes	yes	yes	yes	yes	yes	yes	no	NA	Larp4b (-15424)	NA	0.039008	no	0.588115	no	1.65564
chr13	9653972	9654472	mm10_chr13.9653972.9654472	2.80815	3.22e-08	1.04357	2.64756	1.30681	1.28727	1.53492	1.9721	1.51112	2.11812	0.999697	2.02809	0.969071	1.58348	MM10000000001363657	0.983351	NA	NA	yes	yes	yes	yes	yes	yes	yes	yes	no	Zmynd11 (+110266)	ZMYND11 (+153746)	-0.211592	yes	0.894316	no	0.204705
chr13	10264082	10264582	mm10_chr13.10264082.10264582	2.50236	2.27e-14	0.784004	1.03902	3.36515	1.44265	1.46866	1.71672	3.53157	0.882232	0.554066	0.885318	2.22754	1.62699	MM10000000001366707	0.850689	NA	0.999516	yes	yes	yes	yes	yes	yes	yes	yes	no	Chrm3 (+96512)	CHRM3 (-131980)	0.144884	no	0.470276	no	1.18304
chr13	11219050	11219550	mm10_chr13.11219050.11219550	2.17049	4.5e-11	1.23085	2.58641	0.699175	2.28916	2.92172	2.41723	0.946537	0.286954	0.999994	2.12815	0.699084	1.56411	MM10000000001371482	0.997421	NA	0.983419	yes	yes	yes	yes	yes	no	no	yes	no	Chrm3 (-858456)	MTRNR2L11 (-368145)	0.243616	yes	0.837889	no	0.753082
chr13	12070586	12071086	mm10_chr13.12070586.12071086	3.17361	5.88e-23	0.725502	1.01197	1.29722	0.885747	0.693162	1.05313	1.8494	2.60763	0.551722	1.01057	1.00014	1.15329	MM10000000001375740	0.720181	NA	0.983154	yes	yes	yes	yes	yes	yes	yes	yes	no	Ryr2 (+36109)	RYR2 (+54774)	0.274962	yes	0.383415	no	-0.195555
chr13	12274788	12275288	mm10_chr13.12274788.12275288	2.54691	7.72e-05	1.00034	1.67841	2.25736	0.671987	0.924999	0.765779	2.48551	1.4994	1.00049	1.2083	1.54207	1.36679	MM10000000001376761	0.996966	NA	NA	no	yes	yes	no	yes	yes	no	yes	no	Mtr (-16943)	MTR (-37673)	0.350624	no	0.223651	yes	0.00779811
chr13	12275062	12275562	mm10_chr13.12275062.12275562	2.54691	7.72e-05	1.43474	1.79042	1.34039	1.04533	1.51105	1.45357	2.09273	1.75646	1.17092	1.60288	1.05281	1.47739	MM10000000001376762	0.993246	NA	NA	yes	yes	yes	no	yes	yes	no	yes	no	Mtr (-17217)	MTR (-37834)	0.231984	no	0.552305	yes	0.852061
chr13	13579920	13580420	mm10_chr13.13579920.13580420	2.7812	0.000346845	2.25717	2.8243	0.924458	2.6597	2.74736	2.12441	0.793246	1.58866	1.58407	2.30332	0.751658	1.86894	MM10000000001383286	0.968119	NA	0.994717	yes	yes	yes	yes	yes	yes	yes	yes	no	Lyst (-10227)	LYST (-11755)	0.22716	yes	1.08942	no	1.82293
chr13	15450939	15451439	mm10_chr13.15450939.15451439	2.12988	0.00128056	1.1921	0.452115	0.992279	0.668293	0.89118	1.60454	0.527984	1.63665	0.999925	0.705365	0.630542	0.936452	MM10000000001392641	0.996802	NA	NA	yes	yes	yes	yes	yes	yes	yes	yes	no	Gli3 (-12791)	GLI3 (-9920)	0.116511	no	0.220144	no	0.161347
chr13	15457485	15457985	mm10_chr13.15457485.15457985	2.5215	1.51e-14	0.965885	0.115498	1.19025	0.832065	1.21022	1.17506	1.07506	0.278463	0.714044	0.344711	0.810573	0.791984	MM10000000001392674	0.958021	NA	0.99695	yes	yes	yes	yes	yes	yes	yes	yes	no	Gli3 (-6245)	GLI3 (-5029)	0.09074	no	0.437415	no	0.648137
chr13	20386631	20387131	mm10_chr13.20386631.20387131	1.8568	4.14e-05	1.01051	0.545748	1.1356	1.43594	1.78999	1.73604	2.05351	0.842724	0.831613	0.475391	1.03009	1.17156	MM10000000001417320	0.992793	0.996734	0.999647	yes	yes	yes	yes	yes	yes	yes	yes	no	Elmo1 (+296262)	AOAH (-359114)	0.377804	no	0.478138	yes	0.512931
chr13	21662544	21663044	mm10_chr13.21662544.21663044	2.3369	2.09e-07	2.08056	2.83043	1.41158	1.8395	1.83743	2.18108	1.94666	1.21665	1.20516	2.02669	1.12003	1.79052	MM10000000001423699	0.997537	NA	0.999962	yes	yes	yes	yes	yes	yes	yes	yes	no	Olfr1361 (+592)	OR2B2 (-21431)	0.03619	no	0.159138	no	2.07692
chr13	21662859	21663359	mm10_chr13.21662859.21663359	2.3369	2.09e-07	0.863803	1.18165	1.65554	0.198695	0.491415	0.308908	1.65138	1.88363	0.815438	0.881086	1.36739	1.02718	MM10000000001423701	0.790645	NA	0.988526	no	yes	yes	yes	yes	yes	yes	yes	no	Olfr1361 (+277)	OR2B2 (-21093)	0.024012	no	0.0848003	no	0.52362
chr13	23121134	23121634	mm10_chr13.23121134.23121634	3.0909	1.33e-31	0.176333	1.07949	0.801447	0.436364	0.598678	1.52889	0.963699	0.422464	0.15393	0.874838	0.576285	0.692038	MM10000000001430992	0.828052	NA	0.991321	yes	yes	yes	yes	yes	yes	yes	yes	no	Vmn1r217 (-6654)	HIST1H2BJ (+52678)	-0.039606	yes	-0.22967	no	0.623584
chr13	23121574	23122074	mm10_chr13.23121574.23122074	3.0909	1.33e-31	1.57655	1.38454	0.809133	0.066131	0.382796	0.951545	1.04323	1.39163	0.99959	1.3293	0.8963	0.984613	MM10000000001430995	0.702828	NA	0.99611	yes	yes	yes	yes	yes	yes	yes	yes	no	Vmn1r217 (-7094)	HIST1H2BJ (+52273)	-0.026158	yes	0.171383	no	0.27652
chr13	24153769	24154269	mm10_chr13.24153769.24154269	2.1704	2.62e-05	1.124	1.53379	0.917541	1.07186	1.5324	1.40722	1.57563	1.81631	1.00025	1.35546	0.976443	1.30099	MM10000000001436156	NA	NA	NA	no	yes	yes	yes	yes	no	no	yes	no	Carmil1 (+126776)	CARMIL1 (+172053)	0.086506	yes	0.228891	no	1.00351
chr13	24489989	24490489	mm10_chr13.24489989.24490489	2.39424	9.23e-09	2.72689	3.40578	0.843902	2.59327	3.05966	3.39408	1.92267	0.658006	2.31232	2.8989	0.7901	2.23687	MM10000000001437837	0.962043	NA	0.989306	yes	yes	yes	yes	yes	yes	yes	yes	no	Cmah (+114156)	RIPOR2 (-126604)	-0.071484	yes	1.26248	yes	0.30124
chr13	29044377	29044877	mm10_chr13.29044377.29044877	1.8911	1.85e-06	1.00014	0.98874	1.03568	1.21481	1.24197	1.39348	2.07593	1.69526	0.926943	0.780128	0.945627	1.20897	MM10000000001460609	0.992856	NA	0.982267	yes	yes	yes	yes	yes	yes	yes	no	NA	Sox4 (-90914)	NA	0.064346	yes	0.698437	no	-0.532722
chr13	29162203	29162703	mm10_chr13.29162203.29162703	1.64974	0.00209416	1.53475	0.872888	1.37199	1.1278	1.5605	0.692251	2.33817	0.749414	1.09039	0.78582	1.14521	1.20629	MM10000000001461198	0.998977	0.999967	0.995474	yes	yes	yes	yes	yes	yes	yes	yes	no	Sox4 (-208740)	SOX4 (-204637)	0.131738	no	0.657361	no	0.366859
chr13	29682823	29683323	mm10_chr13.29682823.29683323	1.65638	0.00774413	1.00511	1.2903	1.16115	0.347344	0.669912	0.654325	1.46502	0.913309	0.938614	1.17755	0.84507	0.951609	MM10000000001463801	0.930306	NA	0.990951	no	yes	yes	yes	yes	no	no	yes	no	Cdkal1 (+172601)	CDKAL1 (+252933)	0.019374	yes	0.177888	no	1.13357
chr13	29683379	29683879	mm10_chr13.29683379.29683879	1.65638	0.00774413	1.71014	0.812594	1.16013	0.5005	0.832642	1.0728	1.0469	0.620285	1.17582	0.809701	0.792461	0.957634	MM10000000001463804	0.602233	NA	0.995956	yes	yes	yes	yes	yes	no	no	yes	no	Cdkal1 (+172045)	CDKAL1 (+252589)	0.202286	yes	0.384477	no	0.235608
chr13	30033789	30034289	mm10_chr13.30033789.30034289	2.72023	7.2e-10	0.671938	1.26402	1.49455	0.725643	0.746477	1.03897	1.70248	0.227231	0.591172	0.998996	1.17001	0.966499	MM10000000001465556	0.942441	NA	0.998316	yes	yes	yes	yes	yes	yes	yes	no	NA	E2f3 (-47976)	NA	0.081182	no	-0.238697	no	0.0125742
chr13	30042740	30043240	mm10_chr13.30042740.30043240	1.87424	2.91e-06	1.91831	3.54766	2.05673	1.96662	2.08299	2.16539	2.25225	0.652324	1.30466	2.59398	1.54189	2.00753	MM10000000001465600	0.994823	NA	0.98658	yes	yes	yes	yes	yes	yes	yes	yes	no	E2f3 (-56927)	E2F3 (-65236)	0.145706	yes	0.485414	yes	1.87861
chr13	30042854	30043354	mm10_chr13.30042854.30043354	1.87424	2.91e-06	2.02489	2.68578	2.33939	1.70702	1.68397	1.55082	1.88409	1.43713	1.48355	2.17706	1.87305	1.89516	MM10000000001465601	0.989395	NA	0.994279	yes	yes	yes	yes	yes	yes	yes	yes	no	E2f3 (-57041)	E2F3 (-65314)	0.188756	yes	0.482103	yes	1.67211
chr13	30645499	30645999	mm10_chr13.30645499.30645999	2.03889	0.000209262	0.999761	1.63363	0.54631	1.84312	1.85818	1.72855	0.138207	0.501852	0.76521	1.35536	0.577606	1.08616	MM10000000001468614	0.977727	NA	0.997403	yes	yes	yes	yes	yes	no	no	no	NA	Dusp22 (-14352)	NA	0.137204	no	-0.159374	no	0.38415
chr13	30936300	30936800	mm10_chr13.30936300.30936800	1.88755	3.16e-05	0.9996	1.927	1.05327	0.848691	0.835223	0.995136	1.0576	0.636096	0.999989	1.55299	1.03461	1.08547	MM10000000001470068	0.963333	NA	NA	yes	yes	yes	yes	yes	yes	yes	yes	no	Hus1b (+11209)	HUS1B (+26002)	-0.066384	yes	0.11351	yes	-0.571751
chr13	31458879	31459379	mm10_chr13.31458879.31459379	1.6738	0.000371399	1.80571	1.46824	0.898106	0.128748	0.896618	0.615343	0.0438929	0.1023	1.12819	1.04859	0.682025	0.801615	MM10000000001472681	0.833868	NA	0.994665	yes	yes	yes	no	no	no	no	yes	no	Foxq1 (-97005)	FOXQ1 (-111416)	-0.008182	yes	0.51706	yes	-0.177059
chr13	32398307	32398807	mm10_chr13.32398307.32398807	1.63651	0.00171071	0.507675	0.648893	0.809044	1.04178	0.753998	1.21124	1.10464	1.68892	0.51611	0.643512	0.688249	0.874006	MM10000000001477378	NA	NA	0.989125	yes	yes	yes	yes	yes	yes	yes	no	NA	Gmds (-59817)	NA	0.065498	yes	-0.113529	no	0.45929
chr13	32398644	32399144	mm10_chr13.32398644.32399144	1.63651	0.00171071	0.999763	1.46244	1.32191	0.936481	1.43444	1.22112	0.831804	1.52959	0.819843	1.26328	1.15741	1.17983	MM10000000001477380	0.956993	NA	0.998121	yes	yes	yes	yes	yes	yes	yes	no	NA	Gmds (-60154)	NA	0.104087	yes	0.494018	no	-0.555129
chr13	33144010	33144510	mm10_chr13.33144010.33144510	2.38101	5.43e-06	1.72113	3.6471	1.65558	3.59758	3.72813	3.86383	2.31594	2.71763	1.15054	2.87791	1.32971	2.60046	MM10000000001481107	0.999602	NA	0.984749	yes	yes	yes	yes	yes	yes	yes	yes	no	Serpinb9c (+15482)	CLDN34 (-20226)	0	no	0.0208978	no	1.44062
chr13	34203104	34203604	mm10_chr13.34203104.34203604	2.44866	7.6e-06	1.71383	1.82665	1.10812	0.823129	1.6584	1.46041	1.44272	1.74554	1.19752	1.70693	1.12179	1.43682	MM10000000001486402	0.997572	0.999997	0.98539	yes	yes	yes	yes	yes	yes	yes	yes	no	Psmg4 (+40390)	PSMG4 (+38608)	0.004914	no	0.437527	no	0.142578
chr13	34391994	34392494	mm10_chr13.34391994.34392494	1.65667	4.63e-05	0.926476	1.04689	0.36321	1.45425	1.56573	1.38701	0.363736	0.910309	0.925519	0.971475	0.512759	0.947942	MM10000000001487347	0.989996	NA	NA	no	yes	yes	no	yes	yes	no	yes	no	Slc22a23 (-47062)	SLC22A23 (-50122)	0.10138	yes	-0.20985	no	-0.0205114
chr13	34392294	34392794	mm10_chr13.34392294.34392794	1.65667	4.63e-05	1.04011	0.445555	0.910309	0.454894	0.589852	0.400732	1.16609	0.945609	0.999767	0.298554	0.833988	0.735042	MM10000000001487348	0.97835	NA	0.999002	yes	yes	yes	no	yes	yes	no	yes	no	Slc22a23 (-47362)	SLC22A23 (-50340)	0.002744	yes	0.30647	no	-0.31077
chr13	35087159	35087659	mm10_chr13.35087159.35087659	1.89278	1.08e-06	2.06482	1.42762	1.94739	1.42531	1.69858	1.50763	2.11208	1.90567	1.6192	1.27567	1.53252	1.68332	MM10000000001490823	0.996337	NA	0.997637	yes	yes	yes	yes	yes	yes	yes	yes	no	Eci2 (-93265)	ECI2 (-118060)	0.136592	no	0.872523	no	0.182128
chr13	35326621	35327121	mm10_chr13.35326621.35327121	2.29564	1.27e-14	2.06984	3.20944	1.26663	3.99907	4.27116	3.64349	2.04243	2.89109	1.6294	2.72596	1.00634	2.61408	MM10000000001492020	0.997213	NA	0.989372	yes	yes	yes	yes	yes	yes	yes	yes	no	Eci2 (-332727)	ECI2 (-311585)	0.237052	yes	0.436272	yes	0.445737
chr13	36308889	36309389	mm10_chr13.36308889.36309389	2.53701	9.47e-12	0.671857	0.807601	1.33816	1.29491	1.37638	1.22032	2.05666	0.940493	0.491419	0.760947	0.955305	1.0831	MM10000000001496931	0.981478	NA	0.994286	yes	yes	yes	yes	yes	yes	yes	yes	no	Lyrm4 (-191613)	FARS2 (+238787)	0.44991	no	-0.292721	no	-0.781716
chr13	37922469	37922969	mm10_chr13.37922469.37922969	2.47918	2.64e-11	1.60068	2.388	0.896654	0.801328	1.02341	1.28682	1.49049	2.60173	1.19281	1.94002	0.857104	1.46173	MM10000000001504999	0.913526	NA	NA	yes	yes	yes	yes	yes	yes	yes	yes	no	Ssr1 (+71498)	SSR1 (+94804)	0.04927	yes	0.611241	no	-0.862004
chr13	37922951	37923451	mm10_chr13.37922951.37923451	2.47918	2.64e-11	0.753376	1.33485	0.416602	0.554525	0.867454	0.684897	1.03378	0.105831	0.65584	0.838998	0.359521	0.691425	MM10000000001505002	0.992553	NA	NA	no	no	no	no	no	no	no	yes	no	Ssr1 (+71016)	SSR1 (+94245)	0.0434825	yes	-0.0273796	no	-0.420491
chr13	38520191	38520691	mm10_chr13.38520191.38520691	1.77397	0.00797535	0.998211	1.80288	1.02514	0.80729	1.02996	1.63599	0.813729	1.77829	0.764104	1.43322	0.86284	1.17742	MM10000000001507988	0.946239	NA	0.983596	yes	yes	yes	yes	yes	yes	yes	yes	no	Txndc5 (+8049)	TXNDC5 (+9796)	0.01606	no	0.425613	no	-0.794839
chr13	38520474	38520974	mm10_chr13.38520474.38520974	1.77397	0.00797535	1.6468	2.3136	0.797084	0.439291	0.505878	0.896702	1.54018	1.65464	1.09431	1.88073	0.57321	1.21295	MM10000000001507989	NA	NA	NA	no	yes	yes	yes	yes	yes	yes	no	NA	Txndc5 (+7766)	NA	-0.052052	no	0.409702	no	0.638851
chr13	39297308	39297808	mm10_chr13.39297308.39297808	2.793	1.1e-22	2.10593	2.29227	2.47179	3.61928	4.00629	2.91965	3.27342	1.94117	1.55164	2.04542	1.86287	2.55361	MM10000000001511873	0.997354	NA	0.996876	yes	yes	yes	yes	yes	yes	yes	yes	no	Slc35b3 (-336683)	SLC35B3 (-403635)	0.077754	yes	1.04887	yes	1.5354
chr13	39813098	39813598	mm10_chr13.39813098.39813598	2.0797	0.00023697	1.02284	1.35247	1.24514	1.55718	1.66655	1.77061	1.43028	0.283796	0.93086	1.25218	1.00211	1.22855	MM10000000001514452	0.89219	NA	NA	yes	yes	yes	yes	yes	no	no	yes	no	Ofcc1 (+474663)	OFCC1 (+550555)	0.547752	yes	0.817653	no	1.09367
chr13	41719117	41719617	mm10_chr13.41719117.41719617	1.8373	4.65e-05	1.20767	1.39808	1.81499	1.27729	1.52662	1.23841	2.02895	1.15973	0.999777	1.35691	1.35221	1.39642	MM10000000001523982	0.956565	NA	0.991835	yes	yes	yes	yes	yes	no	no	yes	no	Tmem170b (+113151)	ADTRP (+112602)	0.113014	yes	0.667377	yes	1.90221
chr13	42346663	42347163	mm10_chr13.42346663.42347163	3.28264	0.000253486	1.2037	1.49239	2.53796	1.27095	1.08448	0.94016	3.56624	2.55407	1.0117	1.20483	1.90592	1.70658	MM10000000001527120	0.995503	NA	NA	yes	yes	yes	yes	yes	yes	yes	yes	no	Edn1 (+45437)	EDN1 (+53680)	0.148638	no	1.10521	no	1.39104
chr13	42400323	42400823	mm10_chr13.42400323.42400823	2.85911	8.34e-08	1.17885	1.42115	2.09537	1.34923	1.12992	0.823545	2.2296	0.884499	0.810797	1.01206	1.72545	1.33277	MM10000000001527388	0.770468	NA	NA	yes	yes	yes	yes	yes	no	no	yes	no	Edn1 (+99097)	EDN1 (+104253)	0.41263	no	0.0565148	no	1.52853
chr13	43090085	43090585	mm10_chr13.43090085.43090585	2.29568	1.28e-05	0.999699	1.25919	1.43431	1.04482	1.0654	0.89972	1.28422	0.959491	0.696483	1.11557	1.04452	1.07304	MM10000000001530837	0.930949	NA	0.991294	yes	yes	yes	yes	yes	yes	yes	yes	no	Tbc1d7 (+81149)	TBC1D7 (+109012)	0.442176	no	-0.0614207	no	1.15593
chr13	43090719	43091219	mm10_chr13.43090719.43091219	2.29568	1.28e-05	1.27845	3.23926	0.976025	0.594416	0.830396	1.26466	1.98639	3.44101	1.00011	2.22959	0.782625	1.60208	MM10000000001530840	NA	NA	NA	no	yes	yes	yes	yes	yes	yes	yes	no	Tbc1d7 (+80515)	TBC1D7 (+109605)	-0.0364895	no	0.672252	no	0.181047
chr13	43336192	43336692	mm10_chr13.43336192.43336692	2.90047	2.2e-07	2.28936	2.79698	2.42231	1.37546	1.67447	1.99576	3.41161	2.92393	1.5827	2.17059	1.70389	2.21337	MM10000000001532068	0.998918	NA	NA	yes	yes	yes	yes	yes	yes	yes	yes	no	Sirt5 (-29064)	GFOD1 (-37000)	-0.033154	no	0.677969	no	0.144196
chr13	43567445	43567945	mm10_chr13.43567445.43567945	2.4782	4.02e-10	1.83854	2.25446	0.791754	0.290433	0.516736	1.55496	0.933807	1.94559	1.26164	1.92924	0.453571	1.25188	MM10000000001533224	0.993105	NA	NA	yes	yes	yes	yes	yes	yes	yes	no	NA	Mcur1 (-7534)	NA	0.08757	no	-0.298131	no	-0.942728
chr13	44360895	44361395	mm10_chr13.44360895.44361395	2.2432	9.48e-08	1.47391	1.58388	1.75219	1.31145	1.13812	1.16226	1.8664	1.43808	1.10716	1.3004	1.3489	1.40752	MM10000000001537191	0.929777	0.999993	0.988976	yes	yes	yes	yes	yes	yes	yes	yes	no	Jarid2 (-370126)	JARID2 (-479980)	0.240708	no	0.186385	yes	-0.0917659
chr13	45528715	45529215	mm10_chr13.45528715.45529215	2.67143	1.69e-09	1.29327	2.15496	1.44914	1.51761	1.22605	1.60259	1.29724	2.04192	1.0001	1.83776	1.09857	1.50175	MM10000000001543030	0.965756	NA	NA	yes	yes	yes	yes	yes	yes	yes	yes	no	Gmpr (+21521)	GMPR (+34871)	0.264858	yes	0.469421	no	0.750428
chr13	45842489	45842989	mm10_chr13.45842489.45842989	2.73015	1.12e-16	1.96406	1.6037	0.5984	1.38687	1.87875	1.54626	1.61613	1.64609	1.47886	1.27575	0.488567	1.40759	MM10000000001544599	0.973717	NA	0.987646	yes	yes	yes	yes	yes	yes	yes	yes	no	Atxn1 (+122238)	ATXN1 (+116260)	0.273674	yes	1.35164	yes	1.90193
chr13	45866950	45867450	mm10_chr13.45866950.45867450	2.13448	4.3e-06	0.491771	0.265717	0.511094	0.136592	0.117897	0.605047	0.828161	1.23119	0.2494	0.154607	0.284549	0.443275	MM10000000001544721	NA	NA	NA	no	yes	yes	yes	yes	yes	yes	yes	no	Atxn1 (+97777)	ATXN1 (+90663)	0.274982	yes	0.20134	yes	0.593665
chr13	45867251	45867751	mm10_chr13.45867251.45867751	2.13448	4.3e-06	1.57028	1.70796	2.29513	2.36848	2.64392	2.22045	3.64391	2.56624	1.09008	1.18478	1.57139	2.07842	MM10000000001544723	0.991637	NA	0.998884	yes	yes	yes	yes	yes	yes	yes	yes	no	Atxn1 (+97476)	ATXN1 (+90479)	0.336434	yes	-0.127739	yes	0.617577
chr13	47261915	47262415	mm10_chr13.47261915.47262415	1.97092	0.000114684	1.00037	0.585685	1.62292	0.387807	0.190028	0.748522	2.47418	0.515094	0.817018	0.625123	1.13023	0.917907	MM10000000001551696	0.945265	NA	0.999432	yes	yes	yes	yes	yes	yes	yes	yes	no	Rnf144b (+139509)	RNF144B (+92128)	0.04976	yes	0.138709	yes	1.15301
chr13	47387223	47387723	mm10_chr13.47387223.47387723	2.90174	5.4e-07	1.64149	2.17337	3.70172	2.91884	2.5681	2.16407	4.24134	1.87511	1.13228	1.93209	2.64085	2.45357	MM10000000001552323	0.994717	NA	NA	yes	yes	yes	yes	yes	no	no	yes	no	Rnf144b (+264817)	RNF144B (+250734)	0.088318	no	0.470223	no	2.25338
chr13	47770867	47771367	mm10_chr13.47770867.47771367	2.072	0.00530688	1.44554	1.98881	2.06131	2.03814	2.1247	1.86989	2.76591	0.799231	1.00348	1.39087	1.57712	1.73318	MM10000000001554241	0.948813	NA	0.999475	yes	yes	yes	yes	yes	yes	yes	yes	no	Id4 (-490111)	ID4 (-690384)	0.356426	no	0.80569	no	0.672521
chr13	47811419	47811919	mm10_chr13.47811419.47811919	2.74042	7.86e-10	1.00023	0.728952	0.823705	0.468124	0.965175	1.05167	0.0836356	0.378363	0.96544	0.462119	0.606148	0.684869	MM10000000001554444	0.98015	NA	0.992037	yes	yes	yes	yes	yes	yes	yes	yes	no	Id4 (-449559)	ID4 (-617523)	0.385306	no	0.839375	yes	0.683356
chr13	47811562	47812062	mm10_chr13.47811562.47812062	2.74042	7.86e-10	1.99708	3.50618	1.76197	3.25442	3.49627	3.85642	2.76494	1.42653	1.44713	2.7723	1.46075	2.52218	MM10000000001554445	0.996992	NA	NA	yes	yes	yes	yes	yes	yes	yes	yes	no	Id4 (-449416)	ID4 (-617364)	0.484792	no	0.41497	yes	0.935346
chr13	48063750	48064250	mm10_chr13.48063750.48064250	2.83692	3.27e-06	0.491547	0.479166	2.29986	0.398886	0.863384	0.290016	3.49719	2.10211	0.324544	0.416452	1.72071	1.17126	MM10000000001555705	0.911865	NA	NA	yes	yes	yes	yes	yes	yes	yes	yes	no	Id4 (-197228)	ID4 (-241325)	0.48782	no	0.292585	no	1.02176
chr13	48453971	48454471	mm10_chr13.48453971.48454471	2.91849	0.00265043	2.49021	3.18432	1.22807	2.37831	2.53159	2.57369	3.1851	0.952836	1.97431	2.42917	0.884472	2.16473	MM10000000001557657	0.997181	NA	NA	yes	yes	yes	yes	yes	yes	yes	yes	no	Zfp169 (+59173)	MBOAT1 (+167152)	0.128124	yes	1.1511	no	0.758108
chr13	48634545	48635045	mm10_chr13.48634545.48635045	3.01353	8.67e-11	1.0046	0.538027	1.07921	0.846458	0.896275	0.407071	1.57684	1.93564	1.00001	0.405052	0.863701	0.959353	MM10000000001558559	0.933959	NA	NA	yes	yes	yes	yes	yes	yes	yes	yes	no	Ptpdc1 (-9131)	BARX1 (-63578)	0.232935	yes	0.666655	no	1.11008
chr13	49071924	49072424	mm10_chr13.49071924.49072424	2.05986	1.34e-07	1.53724	2.23666	1.05401	0.0167803	0.616004	0.592344	1.47311	0.47849	1.19493	1.82368	0.832369	1.07778	MM10000000001560746	0.993751	NA	0.986871	yes	yes	yes	no	yes	no	no	yes	no	Wnk2 (+75840)	WNK2 (+77572)	0.080584	yes	0.74506	no	-0.360752
chr13	52501552	52502052	mm10_chr13.52501552.52502052	1.53039	0.00245245	1.4482	2.08672	2.05534	2.74828	2.92259	2.45948	1.80417	3.64896	0.99989	1.60294	1.33975	2.10148	MM10000000001577895	0.961098	NA	NA	yes	yes	yes	no	yes	yes	no	yes	no	Diras2 (+29477)	DIRAS2 (+45310)	0.028178	yes	0.949622	yes	0.903376
chr13	52968100	52968600	mm10_chr13.52968100.52968600	2.50703	1.23e-08	2.21619	2.54144	0.885609	2.33313	2.83314	2.70373	1.19043	0.864573	1.76479	1.94542	0.663708	1.81292	MM10000000001580227	0.998524	NA	NA	yes	yes	yes	yes	yes	yes	yes	yes	no	Nfil3 (+12723)	NFIL3 (+13644)	0.459574	no	0.890034	yes	0.802259
chr13	52968561	52969061	mm10_chr13.52968561.52969061	2.50703	1.23e-08	1.34875	2.37885	1.33147	0.918168	1.26043	1.28885	2.68106	0.603493	1.19195	1.94463	1.21831	1.46963	MM10000000001580230	NA	NA	NA	no	yes	yes	yes	yes	yes	yes	yes	no	Nfil3 (+12262)	NFIL3 (+13171)	0.38413	no	0.817026	yes	0.0329865
chr13	52968796	52969296	mm10_chr13.52968796.52969296	2.50703	1.23e-08	0.999651	2.50516	0.140904	0.830116	0.95197	1.96511	0.703511	0.186706	1	2.19521	0.112691	1.05373	MM10000000001580231	NA	NA	NA	no	no	no	yes	no	no	no	yes	no	Nfil3 (+12027)	NFIL3 (+12951)	0.104652	no	0.494682	yes	-1.57914
chr13	53850161	53850661	mm10_chr13.53850161.53850661	2.52172	1.84e-07	1.80775	0.416576	1.80681	0.686827	1.16492	0.296746	1.57418	0.515727	1.25363	0.306428	1.48696	1.02878	MM10000000001584638	0.846859	NA	NA	yes	yes	yes	yes	yes	no	no	yes	no	Drd1 (+205247)	DRD1 (+320385)	0.262596	yes	0.474615	yes	1.06023
chr13	53864782	53865282	mm10_chr13.53864782.53865282	2.4726	2.29e-12	1.80844	2.34742	1.43652	1.8228	2.21905	2.01353	1.27042	1.87479	1.41051	1.8776	0.976497	1.73251	MM10000000001584711	0.950489	NA	NA	yes	yes	yes	yes	yes	yes	yes	yes	no	Drd1 (+190626)	DRD1 (+288922)	0.0953152	yes	0.699399	no	-0.0643246
chr13	53865066	53865566	mm10_chr13.53865066.53865566	2.4726	2.29e-12	0.749685	1.0205	1.09614	0.91356	0.976647	0.667197	1.30948	1.8826	0.558898	0.831354	0.828766	0.984984	MM10000000001584712	0.976246	NA	0.996599	yes	yes	yes	yes	yes	yes	yes	yes	no	Drd1 (+190342)	DRD1 (+288769)	0.381377	yes	0.0492537	no	-1.03869
chr13	56805797	56806297	mm10_chr13.56805797.56806297	3.34528	7.65e-12	1.47581	1.92954	0.833566	0.95944	1.59617	1.75719	1.29825	0.811045	1.21368	1.52213	0.567208	1.26946	MM10000000001599416	0.93101	NA	NA	yes	yes	yes	yes	yes	no	no	yes	no	Gm45623 (-52220)	ENSG00000271824 (-55808)	0.321262	no	0.845995	no	-0.304638
chr13	56828239	56828739	mm10_chr13.56828239.56828739	2.09683	0.00162232	1.63648	4.82054	0.330535	2.03279	2.84468	3.30449	0.399413	4.84481	1.21652	3.62583	0.32602	2.30746	MM10000000001599528	0.981588	NA	NA	yes	yes	yes	yes	no	yes	no	yes	no	Trpc7 (+67248)	ENSG00000271824 (-79135)	0.341246	yes	0.450632	yes	-0.864626
chr13	57682957	57683457	mm10_chr13.57682957.57683457	2.70498	1.8e-07	0.999984	1.9518	2.87266	1.9971	1.79	1.57267	3.46713	2.97173	0.9052	1.72227	2.15836	2.03717	MM10000000001603802	NA	NA	NA	yes	yes	yes	yes	yes	yes	yes	yes	no	Spock1 (+225068)	SPOCK1 (+245813)	0.0591	no	0.31135	no	0.686661
chr13	59299188	59299688	mm10_chr13.59299188.59299688	3.83807	1.35e-08	1.55473	1.75082	0.334339	0.0270221	0.407128	0.886646	0.140458	1.77204	1.1524	1.44225	0.116127	0.871269	MM10000000001611883	0.963618	NA	NA	yes	yes	yes	yes	yes	yes	yes	yes	no	Agtpbp1 (+257873)	AGTPBP1 (+476248)	0.18896	no	0.28936	no	0.0630535
chr13	64497859	64498359	mm10_chr13.64497859.64498359	1.95764	0.00332117	0.877882	2.13273	0.581469	1.74296	1.96074	1.50438	1.00985	1.71922	0.708014	1.70417	0.350372	1.29925	MM10000000001637876	0.987655	0.999989	NA	yes	yes	yes	yes	yes	yes	yes	yes	no	Fam240b (-317)	IGFBPL1 (-296231)	0.816824	no	0.156311	no	0.126864
chr13	68568578	68569078	mm10_chr13.68568578.68569078	3.01917	8.06e-07	1.47511	2.3313	0.421012	1.91343	1.49454	2.08474	1.00632	2.07056	1.39494	1.87393	0.30721	1.48846	MM10000000001658230	0.916906	NA	NA	yes	yes	yes	yes	yes	no	no	yes	no	Mtrr (+13276)	MTRR (+20169)	0.100738	no	1.56632	no	0.795016
chr13	70577997	70578497	mm10_chr13.70577997.70578497	2.52044	1.05e-05	1.25345	1.77012	0.0154046	0.737049	0.49284	1.48563	0.316594	1.39913	0.99998	1.25583	0.0443699	0.888218	MM10000000001668277	0.992578	NA	NA	yes	yes	yes	yes	yes	yes	yes	yes	no	Ice1 (+59387)	ICE1 (+81607)	-0.039548	no	0.42038	no	-0.447179
chr13	71799249	71799749	mm10_chr13.71799249.71799749	1.9522	2.65e-09	1.96735	1.21992	1.62896	1.42588	1.29897	1.31164	2.00409	0.476224	1.44566	0.997561	1.24366	1.36545	MM10000000001674383	0.950893	NA	0.999061	yes	yes	yes	yes	yes	no	no	yes	no	Irx1 (+164224)	IRX1 (+240635)	0.177274	no	0.731733	no	0.158162
chr13	72710033	72710533	mm10_chr13.72710033.72710533	2.61075	6.72e-13	2.13235	1.98536	1.12861	2.67741	2.81262	2.04124	3.39957	2.69957	1.32623	1.4247	1.07647	2.06401	MM10000000001678937	0.9989	NA	NA	yes	yes	yes	yes	yes	yes	yes	yes	no	Irx2 (+81463)	IRX2 (+90704)	0.07092	no	0.648059	no	1.21975
chr13	72710338	72710838	mm10_chr13.72710338.72710838	2.61075	6.72e-13	1.17869	2.34675	0.143301	1.69364	1.66517	1.87712	1.0573	1.91637	0.836297	1.83358	0.120612	1.33353	MM10000000001678938	0.983419	NA	NA	no	yes	yes	yes	yes	yes	yes	yes	no	Irx2 (+81768)	IRX2 (+90989)	0.39234	no	0.279117	no	1.34124
chr13	72934944	72935444	mm10_chr13.72934944.72935444	1.93807	0.000129255	2.20914	1.39691	1.0171	0.760232	1.36487	1.20686	1.1309	0.24169	1.65112	1.02661	0.940739	1.17692	MM10000000001680061	0.998368	NA	NA	yes	yes	yes	yes	yes	yes	yes	yes	no	Irx2 (+306374)	IRX2 (+375768)	-0.118808	no	0.580423	no	1.10925
chr13	75497157	75497657	mm10_chr13.75497157.75497657	2.07647	0.00139204	0.269775	0.7758	0.953319	0.46288	0.615884	0.744989	0.119771	0.331515	0.229044	0.602117	0.86443	0.542684	MM10000000001692873	0.865364	NA	NA	yes	yes	yes	yes	no	yes	no	no	NA	Ell2 (-209350)	NA	0	yes	-0.212952	no	-0.462524
chr13	76588228	76588728	mm10_chr13.76588228.76588728	1.88507	4.4e-05	1.77558	2.26298	1.09528	1.88971	2.25512	2.49534	0.924421	0.307489	1.20626	1.74343	0.436687	1.49021	MM10000000001698328	0.993229	NA	0.99174	yes	yes	yes	yes	no	yes	no	yes	no	Mctp1 (+8804)	MCTP1 (+209588)	0.078996	yes	0.439915	yes	0.577989
chr13	80985585	80986085	mm10_chr13.80985585.80986085	2.33071	1.85e-10	0.991843	2.08016	1.16949	3.15555	3.36745	2.39143	1.0907	3.34541	0.624858	1.60556	0.713623	1.86692	MM10000000001720315	0.936594	NA	0.99153	yes	yes	yes	yes	yes	yes	yes	no	NA	Arrdc3 (+102425)	NA	0.078308	no	0.315914	no	1.61204
chr1	159767143	159767643	mm10_chr1.159767143.159767643	3.58198	2.8e-17	1.95147	3.33874	0.608586	2.53376	2.81664	2.75184	2.00682	3.66485	1.63897	2.68977	0.690232	2.2447	MM10000000011544875	0.992429	NA	NA	yes	yes	yes	yes	yes	yes	yes	yes	yes	Tnr (+243624)	TNR (+243110)	0.407278	yes	0.65311	yes	-0.255781
chr13	82477353	82477853	mm10_chr13.82477353.82477853	1.91934	0.000204566	0.112656	2.37144	0.130553	0.428671	0.52024	1.57226	1.36629	2.53626	0.0968696	1.6553	0.165963	0.996046	MM10000000001727774	NA	NA	NA	no	yes	yes	yes	yes	no	no	yes	no	Cetn3 (+694526)	CETN3 (+577390)	0.038166	no	-0.0453183	no	0.827032
chr13	83883773	83884273	mm10_chr13.83883773.83884273	2.68513	3.24e-11	1.2538	3.05387	1.33994	3.35995	3.69302	3.67274	2.88986	0.0671511	1	2.42613	1.14384	2.17275	MM10000000001734806	0.895538	NA	0.990156	yes	yes	yes	yes	yes	yes	yes	yes	no	Tmem161b (-338277)	TMEM161B (-272299)	0.358546	yes	0.284529	no	0.777489
chr13	85883489	85883989	mm10_chr13.85883489.85883989	2.12982	0.000148587	1.2883	2.0927	2.20661	1.43331	1.36795	1.4647	1.74626	1.58524	1.00048	1.68992	1.54961	1.5841	MM10000000001744804	0.996082	NA	0.993518	yes	yes	yes	yes	yes	yes	yes	yes	no	Cox7c (+163165)	COX7C (+148421)	0.436348	no	0.244607	yes	1.93764
chr12	12291962	12292462	mm10_chr12.12291962.12292462	1.79576	9.35e-05	2.33773	2.9437	0.715668	2.21553	2.21055	2.7507	2.55686	3.91511	1.80538	2.16384	0.596829	2.20108	MM10000000001978950	0.965653	NA	NA	yes	yes	yes	yes	yes	yes	yes	yes	yes	Fam49a (+30073)	FAM49A (+29541)	0.155994	yes	0.797792	yes	0.645528
chr13	90334892	90335392	mm10_chr13.90334892.90335392	1.81584	3.46e-05	2.24277	2.88994	0.253028	2.09911	1.95889	2.09061	1.33798	0.115105	1.48431	2.15404	0.266451	1.53566	MM10000000001767061	0.95014	0.996156	NA	yes	yes	yes	yes	yes	yes	yes	yes	no	Xrcc4 (-245534)	TMEM167A (+263343)	0.250442	no	0.407648	no	0.910329
chr13	90755527	90756027	mm10_chr13.90755527.90756027	2.51559	8.94e-05	2.05251	2.0377	0.811776	1.06686	1.36896	0.846001	2.16136	1.38406	1.47324	1.48719	0.687341	1.39791	MM10000000001769164	0.664034	NA	NA	yes	yes	no	no	yes	no	no	yes	no	Atp6ap1l (+149578)	ATP6AP1L (+134663)	0.022616	no	0.536959	no	0.773457
chr13	91644837	91645337	mm10_chr13.91644837.91645337	2.50052	2.34e-18	0.471114	1.65307	2.25076	1.03481	0.602994	1.04397	1.45205	1.12721	0.18754	1.25365	1.5111	1.14439	MM10000000001773611	0.966815	NA	0.994061	yes	yes	yes	no	yes	yes	no	yes	no	Acot12 (-96425)	ACOT12 (-116211)	0.12119	no	-0.644254	no	0.909537
chr13	91645519	91646019	mm10_chr13.91645519.91646019	2.50052	2.34e-18	1.96876	1.69687	0.8387	0.405733	1.08568	0.68212	1.54689	0.422342	1.55174	1.56055	0.671809	1.13011	MM10000000001773614	0.667194	NA	NA	yes	yes	yes	yes	yes	yes	yes	yes	no	Acot12 (-95743)	ACOT12 (-115010)	-0.064812	yes	0.965008	no	0.114175
chr13	92754964	92755464	mm10_chr13.92754964.92755464	2.21897	7.38e-07	1.47123	0.887484	1.09779	0.980053	0.98922	0.427041	1.70524	0.974534	1.02197	0.722159	0.952283	1.02082	MM10000000001779162	0.998081	NA	0.987434	yes	yes	yes	no	yes	yes	no	yes	no	Thbs4 (+39604)	THBS4 (+43779)	0.475014	no	0.603335	no	-0.337406
chr13	93012915	93013415	mm10_chr13.93012915.93013415	2.38632	1.08e-10	2.45242	1.65205	1.6013	1.69544	1.64754	1.76806	2.73843	1.85983	1.95985	1.43962	1.47745	1.84473	MM10000000001780451	0.961374	NA	0.995255	yes	yes	yes	yes	yes	yes	yes	yes	no	Cmya5 (+131559)	CMYA5 (+134923)	0.364672	yes	1.25777	yes	1.07112
chr13	93013154	93013654	mm10_chr13.93013154.93013654	2.38632	1.08e-10	1.07004	0.464717	1.17291	0.863552	0.811981	1.09591	1.19578	0.216068	0.999945	0.548164	1.11375	0.868438	MM10000000001780453	0.842441	NA	NA	yes	yes	yes	yes	yes	yes	yes	yes	no	Cmya5 (+131320)	CMYA5 (+134696)	0.27586	yes	0.0558501	yes	0.722632
chr13	95677781	95678281	mm10_chr13.95677781.95678281	2.85075	0.000241304	1.07215	1.98459	1.53277	2.01473	2.21338	1.96155	0.910176	0.589565	1	1.52693	1.04644	1.44112	MM10000000001793776	0.994765	NA	NA	yes	yes	yes	yes	yes	yes	yes	yes	no	F2rl2 (-18822)	F2RL2 (-22846)	0.100966	no	0.572093	no	0.392244
chr13	95748881	95749381	mm10_chr13.95748881.95749381	3.72348	1.02e-15	0.45518	0.797908	1.75726	1.2272	1.24547	0.672829	1.09736	2.25856	0.195908	0.601469	1.39762	1.06425	MM10000000001794131	0.940744	NA	0.995467	yes	yes	yes	yes	yes	yes	yes	yes	no	F2rl2 (+52278)	F2RL2 (+51779)	0.155256	yes	-0.0652721	no	0.941974
chr13	95966679	95967179	mm10_chr13.95966679.95967179	1.81247	8.16e-05	0.67269	0.891562	2.98964	0.847437	1.01892	1.01584	3.24272	0.718245	0.614152	0.79416	2.34153	1.37699	MM10000000001795220	0.991117	NA	0.997774	yes	yes	yes	yes	yes	no	no	yes	no	Iqgap2 (-75007)	IQGAP2 (-85728)	0.050286	no	0.200466	yes	0.6125
chr13	97357618	97358118	mm10_chr13.97357618.97358118	1.64502	0.00452344	0.7935	0.882842	1.63284	0.367978	0.363018	0.959753	1.6002	0.48447	0.530497	0.823261	1.11438	0.868431	MM10000000001802175	0.801455	0.998238	0.997228	yes	yes	yes	yes	no	no	no	yes	no	Enc1 (+116763)	ENC1 (+125492)	-0.013882	no	-0.0506537	no	0.341805
chr13	97487733	97488233	mm10_chr13.97487733.97488233	2.85678	1.56e-07	0.822616	0.38199	2.337	0.535454	0.602836	0.877262	2.11577	0.951977	0.726463	0.389142	1.75531	1.04507	MM10000000001802825	0.8549	NA	0.992743	yes	yes	yes	yes	yes	yes	yes	yes	no	Enc1 (+246878)	ENC1 (+256383)	0.780414	no	0.276164	yes	1.72003
chr13	97867313	97867813	mm10_chr13.97867313.97867813	2.70527	5.1e-06	1.61012	1.63735	1.62784	1.84054	2.24545	2.07375	2.19469	0.96075	1.25936	1.34481	1.37876	1.65213	MM10000000001804723	0.98236	NA	NA	yes	yes	yes	yes	yes	no	no	yes	no	Gm10260 (-106931)	ARHGEF28 (+345694)	0.498298	no	0.858034	no	0.859288
chr13	97867544	97868044	mm10_chr13.97867544.97868044	2.70527	5.1e-06	1.94275	2.24847	0.875786	1.69377	2.1345	1.95963	0.446374	0.589054	1.52543	1.93346	0.553655	1.44572	MM10000000001804724	0.988953	NA	NA	yes	yes	yes	yes	yes	no	no	yes	no	Gm10260 (-107162)	ARHGEF28 (+345462)	0.656994	no	0.76194	no	-0.355959
chr13	99466937	99467437	mm10_chr13.99466937.99467437	2.0785	0.000470793	1.46095	2.59453	1.99698	1.11682	1.4209	1.43681	2.91331	2.08117	1.06138	2.23442	1.36844	1.78961	MM10000000001812721	0.999647	NA	NA	yes	yes	yes	yes	yes	no	no	yes	no	Map1b (+49353)	MAP1B (+53377)	0.198056	no	0.452612	no	1.28622
chr13	99583844	99584344	mm10_chr13.99583844.99584344	2.21623	5.21e-10	0.999692	1.32458	1.5653	1.39555	1.80588	1.9421	2.5937	1.29751	0.908459	1.36557	1.17225	1.48824	MM10000000001813306	0.862088	NA	0.996598	yes	yes	yes	yes	yes	yes	yes	yes	no	Map1b (-67554)	MAP1B (-61424)	0.208754	yes	0.248094	yes	0.459945
chr13	99847329	99847829	mm10_chr13.99847329.99847829	2.46099	8.75e-07	1.97985	2.14002	1.84239	1.6325	2.47389	2.21813	2.73119	0.767854	1.5142	1.61288	1.32779	1.84006	MM10000000001814623	0.988405	NA	0.996483	yes	yes	yes	yes	yes	no	no	yes	no	Cartpt (+53062)	CARTPT (+57020)	0.395606	no	0.646061	no	1.55298
chr13	99890051	99890551	mm10_chr13.99890051.99890551	2.603	6.6e-08	0.999679	3.13653	0.757997	2.1497	1.98727	2.73018	0.940301	0.819411	1.00043	2.65204	0.472901	1.60422	MM10000000001814837	0.967113	NA	0.980026	yes	yes	yes	yes	yes	no	no	no	NA	Cartpt (+10340)	NA	-0.025734	no	0.611551	no	0.426994
chr13	99947442	99947942	mm10_chr13.99947442.99947942	1.81875	1.2e-06	1.31086	0.909495	1.16538	1.38595	1.96694	1.5296	1.72657	1.13937	1.28036	0.880391	0.979376	1.29766	MM10000000001815124	0.9079	NA	0.996227	yes	yes	yes	no	yes	yes	no	no	NA	Cartpt (-47051)	NA	0.02847	yes	0.616131	yes	0.241863
chr13	99969842	99970342	mm10_chr13.99969842.99970342	2.67654	5.19e-09	1.72278	2.53571	1.95026	2.40928	2.32267	2.25745	3.72775	1.48979	1.19861	2.00592	1.3208	2.08555	MM10000000001815236	0.979445	NA	NA	yes	yes	yes	yes	yes	yes	yes	no	NA	Mccc2 (+45547)	NA	0.009836	no	0.365737	no	1.2357
chr13	100911655	100912155	mm10_chr13.100911655.100912155	1.72049	0.000360621	1.90381	2.4919	2.18414	0.671678	1.13285	0.809085	3.86047	1.58379	1.22091	1.98181	1.78125	1.78379	MM10000000001819945	0.985011	NA	0.998282	yes	yes	yes	no	yes	yes	no	yes	no	Slc30a5 (-78478)	SLC30A5 (-102535)	0.175814	no	0.34415	no	2.4269
chr13	100911906	100912406	mm10_chr13.100911906.100912406	1.72049	0.000360621	1.46772	1.64275	0.749361	0.795926	0.939015	0.320612	0.791309	2.33065	1.00023	1.25596	0.650453	1.08582	MM10000000001819946	0.905641	0.991182	0.998207	yes	yes	yes	no	yes	yes	no	yes	no	Slc30a5 (-78729)	SLC30A5 (-102733)	0.229088	no	0.436811	no	0.785128
chr13	101128553	101129053	mm10_chr13.101128553.101129053	1.96065	7e-09	2.22395	2.08913	1.28134	2.17612	2.50884	1.78872	1.97218	2.3926	1.75448	1.7253	1.02839	1.90373	MM10000000001821030	0.999359	1	0.998278	yes	yes	yes	yes	yes	yes	yes	yes	no	Slc30a5 (-295376)	SLC30A5 (-275080)	0.378992	yes	0.970319	yes	0.516283
chr13	101128812	101129312	mm10_chr13.101128812.101129312	1.96065	7e-09	1.88541	4.16269	1.66848	2.11786	2.37544	2.98003	2.82689	3.79132	1.20918	3.28359	1.42343	2.52039	MM10000000001821031	0.997226	NA	0.983588	no	yes	yes	yes	yes	yes	yes	yes	no	Slc30a5 (-295635)	SLC30A5 (-275337)	0.31506	yes	0.239996	yes	0.549985
chr13	101597812	101598312	mm10_chr13.101597812.101598312	1.67248	0.00236004	1.37033	2.92112	0.491344	2.7097	2.94415	3.12626	0.858665	0.571232	1.00019	2.20607	0.182289	1.67103	MM10000000001823376	0.998122	NA	NA	yes	yes	yes	yes	yes	yes	yes	yes	no	Pik3r1 (+170155)	PIK3R1 (+167953)	0.108198	yes	0.470538	yes	-0.990601
chr13	103207089	103207589	mm10_chr13.103207089.103207589	2.25334	6.5e-05	1.14368	1.10157	1.07108	0.784988	1.12932	0.97202	3.00008	0.721392	0.999859	0.940688	0.851618	1.15603	MM10000000001831422	0.91759	NA	NA	yes	yes	yes	yes	yes	no	no	no	NA	Mast4 (+127121)	NA	0.083944	yes	0.573809	no	-0.126399
chr13	103346875	103347375	mm10_chr13.103346875.103347375	2.87899	4.21e-09	1.6903	1.85821	0.612437	1.38395	1.52474	2.01033	1.50331	1.53237	1.37979	1.64951	0.566523	1.42832	MM10000000001832121	0.987278	NA	NA	yes	yes	yes	yes	yes	no	no	yes	no	Mast4 (-12665)	MAST4 (-12742)	0.101566	yes	0.208575	no	1.29223
chr13	103480546	103481046	mm10_chr13.103480546.103481046	2.00064	9.84e-08	1.00177	2.46838	0.453284	0.218624	0.33981	1.02457	0.837936	2.83402	0.999831	2.06125	0.690713	1.17547	MM10000000001832789	NA	NA	NA	no	no	no	no	no	no	no	yes	no	Mast4 (-146336)	MAST4 (-139259)	0.15432	yes	0.629359	no	0.281791
chr13	103542435	103542935	mm10_chr13.103542435.103542935	1.96361	4.98e-05	1.75594	1.00071	1.99994	0.747673	0.623135	1.14537	2.37096	2.63992	1.17585	1.02278	1.48082	1.45119	MM10000000001833099	0.976488	NA	0.998732	yes	yes	yes	no	yes	yes	no	no	NA	Mast4 (-208225)	NA	0.04435	yes	0.73323	no	0.626006
chr13	103698173	103698673	mm10_chr13.103698173.103698673	2.98603	4.9e-21	1.52841	1.70986	1.01861	1.30386	1.39682	1.33667	1.09965	2.03957	1.26571	1.37212	0.845978	1.35611	MM10000000001833878	0.9995	NA	0.994677	yes	yes	yes	yes	yes	yes	yes	yes	no	Srek1 (+66159)	SREK1 (+83657)	0.200684	yes	0.601668	yes	0.775061
chr13	104645837	104646337	mm10_chr13.104645837.104646337	1.54686	0.00150783	1.33539	1.25275	2.15757	1.58801	1.56886	1.26945	2.59133	0.142762	1.00576	1.09521	1.65346	1.42369	MM10000000001838616	0.990639	NA	0.999556	yes	yes	yes	yes	yes	no	no	yes	no	Cwc27 (+170866)	CWC27 (+229234)	0.472732	yes	0.408084	no	0.67688
chr13	106795528	106796028	mm10_chr13.106795528.106796028	1.8474	0.000894455	2.75638	4.73004	0.298251	1.94655	2.53534	2.93232	2.08564	2.33168	2.21602	3.95576	0.400739	2.38079	MM10000000001849364	0.997769	NA	NA	yes	yes	yes	yes	yes	yes	yes	yes	no	Ipo11 (+141180)	LRRC70 (+48383)	0.479624	yes	0.764573	no	0.0239037
chr13	108278491	108278991	mm10_chr13.108278491.108278991	2.5287	9.4e-14	1.00034	2.35544	0.897764	2.85381	2.27626	2.7727	1.04354	1.80293	0.721693	1.83329	0.761245	1.66536	MM10000000001856779	0.997271	NA	NA	yes	yes	yes	yes	yes	yes	yes	yes	no	Depdc1b (-37591)	DEPDC1B (-58314)	0.166336	yes	0.226949	yes	1.04277
chr13	109207939	109208439	mm10_chr13.109207939.109208439	1.97394	0.000301707	0.721492	0.56474	1.3153	0.826012	1.29886	0.995441	0.656176	0.541335	0.54993	0.384696	1.13178	0.816887	MM10000000001861426	0.78776	NA	0.985846	yes	yes	yes	yes	yes	yes	yes	yes	no	Pde4d (+554012)	PDE4D (+77821)	0.02265	no	-0.181358	no	-0.0564565
chr13	110756815	110757315	mm10_chr13.110756815.110757315	2.17723	4.52e-06	1.69907	1.12165	1.84772	2.03846	2.06375	1.26877	2.60096	1.6996	1.15187	0.780368	1.31811	1.59912	MM10000000001869171	0.985805	0.985508	0.993435	yes	yes	yes	no	yes	yes	no	yes	no	Plk2 (+362019)	PLK2 (+447998)	0.366604	no	0.0644954	yes	1.52536
chr13	111214644	111215144	mm10_chr13.111214644.111215144	2.23029	0.00210981	1.23445	1.33186	0.820083	0.192853	0.243531	0.046759	2.08134	0.795103	1.00046	0.937701	0.793637	0.861616	MM10000000001871460	0.984648	NA	NA	yes	yes	yes	yes	yes	yes	yes	yes	no	Actbl2 (-40119)	ACTBL2 (-34721)	0.107244	no	0.493045	no	1.65516
chr13	111968579	111969079	mm10_chr13.111968579.111969079	2.52311	7.05e-13	1.72005	1.73874	2.13554	2.32523	2.57041	1.65721	2.72841	0.317949	1.08423	1.36787	1.65103	1.75424	MM10000000001875230	0.960469	NA	0.996897	yes	yes	yes	yes	yes	yes	yes	yes	no	Map3k1 (-159836)	MAP3K1 (-179429)	0.133796	yes	0.305969	no	0.968691
chr13	112072155	112072655	mm10_chr13.112072155.112072655	2.66352	3.52e-07	1.00002	1.26683	0.851043	0.243419	0.63517	0.685275	0.653755	1.83609	0.885308	1.09831	0.638255	0.890316	MM10000000001875748	0.936417	NA	0.990075	yes	yes	yes	yes	yes	yes	yes	yes	no	Ankrd55 (-216415)	MAP3K1 (-300291)	-0.011546	no	0.661727	no	0.769785
chr13	112211103	112211603	mm10_chr13.112211103.112211603	2.18707	6.96e-08	1.00001	2.86814	0.264841	1.18573	1.4485	1.74239	0.0706085	0.80352	0.927285	2.10055	0.125218	1.13971	MM10000000001876442	0.812328	NA	NA	yes	yes	yes	yes	yes	yes	yes	yes	no	Ankrd55 (-77467)	IL6ST (-329367)	0.138516	yes	0.746464	yes	-0.223559
chr13	112538443	112538943	mm10_chr13.112538443.112538943	2.3118	7.3e-07	1.1163	1.42633	1.74278	1.52622	1.57631	1.96672	2.09001	4.37011	0.961078	1.17824	1.08647	1.73096	MM10000000001878079	0.995472	NA	NA	yes	yes	yes	yes	yes	yes	yes	yes	no	Il31ra (+41969)	IL31RA (+49615)	0.088632	no	0.0217909	no	-0.0065557
chr13	113348293	113348793	mm10_chr13.113348293.113348793	1.85228	0.000228217	1.10685	1.24774	1.48292	2.07357	2.12685	2.43163	2.3489	0.931358	0.999964	1.04474	1.32126	1.55598	MM10000000001882128	0.964447	0.99066	0.99865	yes	yes	yes	yes	yes	no	no	no	NA	BC067074 (+55384)	NA	0.068618	no	0.315859	no	0.959326
chr13	116738640	116739140	mm10_chr13.116738640.116739140	2.08671	0.000263502	2.07515	3.56767	0.746239	3.02886	2.78101	2.50452	2.18136	0.611106	1.54109	2.71534	0.715835	2.04256	MM10000000001899080	0.999324	NA	NA	yes	yes	yes	yes	yes	no	no	yes	no	Parp8 (+286632)	PARP8 (+262536)	0.42202	no	0.547599	no	0.66506
chr13	116782343	116782843	mm10_chr13.116782343.116782843	3.44321	1.17e-12	1.09829	0.97984	1.04623	1.26234	1.09523	1.18585	1.07043	0.545836	1.01535	0.952025	0.9145	1.01508	MM10000000001899298	0.96649	NA	0.985964	yes	yes	yes	yes	yes	yes	yes	no	NA	Parp8 (+242929)	NA	0.136792	yes	0.528177	yes	1.67178
chr14	8160095	8160595	mm10_chr14.8160095.8160595	2.20917	1.62e-08	1.00015	0.686766	1.20106	1.28626	1.42332	1.45719	1.86965	1.3495	0.930304	0.574653	0.84785	1.14788	MM10000000004655632	0.941999	NA	0.994331	yes	yes	yes	yes	yes	yes	yes	yes	no	Pdhb (+12680)	PDHB (+12935)	0.178638	no	0.421898	no	1.13443
chr14	9692560	9693060	mm10_chr14.9692560.9693060	2.14787	1.15e-07	1.08482	1.65588	0.843821	2.81898	2.86738	2.95147	2.34144	1.28683	0.941715	1.43632	0.571037	1.70906	MM10000000004663295	NA	NA	NA	yes	yes	yes	yes	yes	no	no	yes	no	NONE	NONE	0.03785	yes	0.463295	no	0.05781
chr14	10126541	10127041	mm10_chr14.10126541.10127041	2.18085	0.00280292	1.31592	1.85724	0.753512	2.39518	2.64399	2.66592	0.913317	2.20471	1.00002	1.51195	0.646541	1.62803	MM10000000004665464	NA	NA	NA	yes	yes	yes	yes	yes	yes	yes	yes	no	NONE	NONE	0.668572	no	0.915777	no	0.390906
chr14	11897041	11897541	mm10_chr14.11897041.11897541	2.15048	6.64e-05	0.926939	1.43848	1.07139	0.759737	1.00074	1.0299	2.04857	0.136346	0.726358	1.07151	1.10195	1.02836	MM10000000004674317	0.955224	NA	NA	yes	yes	yes	yes	yes	yes	yes	yes	no	Ptprg (+343759)	PTPRG (+377433)	0.130064	yes	0.187484	no	0.89667
chr14	13134163	13134663	mm10_chr14.13134163.13134663	2.24935	6.68e-05	1.6128	3.26845	0.654408	3.78841	3.55952	3.58605	1.44786	1.00151	1.34535	2.60413	0.582036	2.13187	MM10000000004680503	0.997277	NA	NA	yes	yes	yes	yes	yes	yes	yes	yes	no	Synpr (-150367)	SYNPR (-135129)	0.146868	no	0.579045	no	1.38791
chr14	15629778	15630278	mm10_chr14.15629778.15630278	2.16597	5.29e-05	1.07536	1.97577	1.53675	1.45322	1.24892	1.74519	2.09168	1.8505	0.951338	1.58961	1.08024	1.50896	MM10000000004692981	0.99582	NA	0.999422	yes	yes	yes	yes	yes	yes	yes	yes	no	Lrrc3b (-191041)	LRRC3B (-195398)	0.033912	no	0.0311335	yes	2.77851
chr14	15629966	15630466	mm10_chr14.15629966.15630466	2.16597	5.29e-05	1.56397	2.34741	1.38452	0.693242	0.676367	1.38647	2.11449	1.67072	1.00027	1.75704	0.995831	1.4173	MM10000000004692982	0.982365	0.999486	0.998425	yes	yes	yes	yes	yes	yes	yes	yes	no	Lrrc3b (-191229)	LRRC3B (-195772)	0.111882	no	-0.21835	yes	1.14026
chr14	15630145	15630645	mm10_chr14.15630145.15630645	2.16597	5.29e-05	1.37861	0.657411	1.99249	0.840127	1.01507	1.03366	2.31091	1.43076	0.999877	0.668064	1.40719	1.24856	MM10000000004692982	0.982365	0.999486	0.998425	yes	yes	yes	yes	yes	yes	yes	yes	no	Lrrc3b (-191408)	LRRC3B (-195986)	0.156916	no	0.407724	yes	1.07469
chr14	22149963	22150463	mm10_chr14.22149963.22150463	3.03907	1.5e-07	1.0779	3.14358	0.891881	2.45041	2.27224	2.0909	1.27873	1.43893	0.762184	2.32492	0.541305	1.66118	MM10000000004725582	0.972234	NA	NA	yes	yes	yes	yes	yes	yes	yes	yes	no	Lrmda (+130501)	LRMDA (+164393)	0.062602	no	0.209379	no	0.549804
chr14	22599242	22599742	mm10_chr14.22599242.22599742	1.74452	0.00751465	1.39369	1.6646	1.07041	0.32758	0.661455	0.791128	0.62939	1.23354	1.00017	1.38173	1.01542	1.01537	MM10000000004727828	0.987956	NA	NA	yes	yes	yes	yes	yes	yes	yes	yes	no	Lrmda (+579780)	LRMDA (+630732)	0.553994	no	0.0696736	yes	0.888033
chr14	22782782	22783282	mm10_chr14.22782782.22783282	2.68687	1.81e-10	2.04877	3.48975	1.28431	3.61116	3.46888	3.07581	2.14239	1.77825	1.29981	2.78258	0.877351	2.35082	MM10000000004728746	0.999025	NA	NA	yes	yes	yes	yes	yes	no	no	yes	no	Lrmda (+763320)	LRMDA (+850597)	1.11221	no	0.712328	no	1.14249
chr14	22912955	22913455	mm10_chr14.22912955.22913455	3.21702	1.7e-12	0.694929	1.93178	0.401764	0.376151	0.732459	1.9754	0.0577848	1.65262	0.423516	1.61828	0.0895984	0.904935	MM10000000004729397	0.89315	NA	NA	yes	yes	yes	yes	yes	yes	yes	yes	no	Lrmda (+893493)	LRMDA (+972798)	0.69345	no	0.420126	no	-0.705153
chr14	22913158	22913658	mm10_chr14.22913158.22913658	3.21702	1.7e-12	1.54153	2.66844	1.3666	0.734647	1.17596	1.61636	1.6149	1.42123	1.08103	2.16339	1.08761	1.49743	MM10000000004729398	0.906869	NA	NA	yes	yes	yes	yes	yes	yes	yes	yes	no	Lrmda (+893696)	LRMDA (+973015)	0.286058	no	0.44837	no	0.413968
chr14	23243803	23244303	mm10_chr14.23243803.23244303	2.38099	2.2e-08	1.70682	3.85826	1.98152	2.8714	2.95254	2.49601	1.9857	3.63047	1.0869	3.03848	1.58944	2.4725	MM10000000004731051	0.999678	NA	NA	yes	yes	yes	yes	yes	yes	yes	yes	no	Kcnma1 (+760152)	KCNMA1 (+858003)	0.39447	yes	0.042186	yes	0.202839
chr14	23300388	23300888	mm10_chr14.23300388.23300888	2.47682	2.99e-08	0.999904	2.35031	0.853121	0.950439	1.44273	1.31013	1.48269	2.0732	0.824916	1.5751	0.753145	1.3287	MM10000000004731334	0.876053	NA	0.99468	yes	yes	yes	yes	yes	yes	yes	yes	no	Kcnma1 (+703567)	KCNMA1 (+759117)	0.281122	yes	0.210968	no	0.688397
chr14	27658533	27659033	mm10_chr14.27658533.27659033	2.61815	0.00204777	0.999585	1.81553	2.1512	2.07042	2.27817	1.89221	1.98937	3.98787	0.734088	1.32344	1.414	1.87781	MM10000000004753124	0.990393	NA	NA	yes	yes	yes	yes	yes	yes	yes	yes	no	Erc2 (+36341)	ERC2 (+39481)	0.51607	no	0.518405	no	1.61935
chr14	29548610	29549110	mm10_chr14.29548610.29549110	2.44352	5.08e-08	1.79918	3.71259	0.402101	2.50106	3.08436	3.55065	0.628381	0.782606	1.38581	2.94664	0.254146	1.91341	MM10000000004762575	0.99807	NA	NA	yes	yes	yes	yes	yes	no	no	yes	no	Cacna2d3 (+173004)	CACNA2D3 (+185089)	0.58036	yes	0.899265	yes	0.816497
chr14	29549330	29549830	mm10_chr14.29549330.29549830	2.44352	5.08e-08	1.71975	2.9652	0.755388	0.836577	1.0656	1.51072	1.59898	2.28874	1.31048	2.39691	0.80647	1.56862	MM10000000004762578	0.923914	NA	NA	no	no	no	no	no	no	no	yes	no	Cacna2d3 (+172284)	CACNA2D3 (+184534)	0.09825	yes	0.970994	yes	0.523574
chr14	29877539	29878039	mm10_chr14.29877539.29878039	1.59708	0.00641508	1.31747	0.809521	0.93111	1.24574	1.56426	1.97771	1.72884	0.698188	1.18005	0.820168	0.848046	1.19283	MM10000000004764219	0.985659	NA	NA	yes	no	no	no	yes	no	no	yes	no	Selenok (-90519)	SELENOK (-103337)	0.464522	yes	1.21344	no	0.340931
chr14	30045245	30045745	mm10_chr14.30045245.30045745	3.43947	4.5e-16	0.811626	1.60647	0.400251	1.30439	1.73913	1.96085	0.821612	0.717156	0.798334	1.1867	0.122534	1.04264	MM10000000004765058	0.991294	NA	0.98332	yes	yes	yes	yes	yes	yes	yes	yes	no	Chdh (+36472)	CHDH (+38069)	-0.00150401	no	0.288251	yes	-0.514991
chr14	30045588	30046088	mm10_chr14.30045588.30046088	3.43947	4.5e-16	0.99965	1.11298	0.762469	0.644296	0.657506	0.343405	0.536647	0.254051	0.857369	0.973405	0.723428	0.715019	MM10000000004765060	0.798667	NA	NA	no	yes	yes	yes	yes	yes	yes	yes	no	Chdh (+36815)	CHDH (+38595)	-0.156698	no	0.616778	yes	-0.00497873
chr14	30870192	30870692	mm10_chr14.30870192.30870692	1.85391	0.000470124	1.14613	2.25568	0.487222	2.11355	2.22392	2.41703	1.21784	0.574844	1.00439	1.94414	0.316951	1.42743	MM10000000004769183	0.994011	NA	0.982245	yes	yes	yes	yes	yes	yes	yes	yes	no	Mustn1 (-8815)	ENSG00000243696 (-9518)	0.113726	no	0.567738	no	-0.00730848
chr14	31414912	31415412	mm10_chr14.31414912.31415412	2.57774	1.98e-15	1.04299	2.08801	1.17336	0.650652	1.15556	1.29636	1.23042	3.62994	1.00026	1.75876	0.965539	1.4538	MM10000000004771906	0.987392	NA	NA	yes	yes	yes	yes	yes	yes	yes	yes	no	Sh3bp5 (+20903)	SH3BP5 (+21575)	0.085038	yes	0.624814	no	0.456732
chr14	32717443	32717943	mm10_chr14.32717443.32717943	2.71983	2.04e-06	2.06524	1.35304	3.20737	1.73016	1.79613	1.13161	3.59947	0.830432	1.54412	1.17697	2.44033	1.89772	MM10000000004778419	0.979679	NA	NA	no	no	no	no	no	no	no	yes	no	3425401B19Rik (-32421)	C10orf128 (-71144)	-0.0177315	no	0.656598	no	1.58146
chr14	34440385	34440885	mm10_chr14.34440385.34440885	1.82085	0.00139708	0.858408	0.412282	2.56688	0.536836	0.761275	0.417826	2.73131	0.465208	0.74055	0.435507	2.30237	1.11168	MM10000000004787034	0.819877	NA	NA	yes	yes	yes	yes	yes	no	no	yes	no	Bmpr1a (+62052)	MMRN2 (+64796)	0.024354	yes	-0.137473	yes	0.375819
chr14	35361458	35361958	mm10_chr14.35361458.35361958	2.47583	5.04e-08	1.84809	1.59431	1.62111	1.15474	1.47458	0.928075	1.82793	2.63821	1.33173	1.2377	1.246	1.53659	MM10000000004791639	0.988124	NA	0.993318	yes	yes	yes	yes	yes	yes	yes	yes	no	4930596D02Rik (+450270)	GRID1 (+577263)	0.339978	no	0.653377	no	0.547576
chr14	44163554	44164054	mm10_chr14.44163554.44164054	2.35567	6.47e-08	1.49535	1.8917	0.223666	2.37147	2.63498	2.98575	0.62555	0.117489	1.14301	1.59419	0.171899	1.38682	MM10000000004835650	0.958368	NA	NA	yes	yes	yes	yes	yes	no	no	no	NA	4930503E14Rik (+7567)	NA	-0.132469	no	0.376378	no	0.208808
chr14	47957978	47958478	mm10_chr14.47957978.47958478	1.88681	0.000173859	0.588122	0.0604958	0.889487	0.632555	0.966844	0.572779	1.05722	0.258386	0.463203	0.104704	0.94824	0.594731	MM10000000004854622	0.935987	NA	0.997374	yes	yes	yes	no	yes	no	no	yes	no	Peli2 (-162641)	PELI2 (-161597)	0.147646	yes	-0.0837033	yes	1.37503
chr14	48162383	48162883	mm10_chr14.48162383.48162883	2.95562	1.44e-24	1.82027	2.42631	1.75859	2.10989	2.58675	2.15273	2.73096	2.58806	1.47916	1.86001	1.29296	2.07324	MM10000000004855644	0.974257	NA	0.996406	yes	yes	yes	yes	yes	yes	yes	yes	no	Peli2 (+41764)	PELI2 (+52840)	0.077072	yes	0.653864	yes	-0.635506
chr14	53078954	53079454	mm10_chr14.53078954.53079454	2.19819	0.000732563	1.17914	1.46675	0.103728	0.64978	1.02235	1.08194	1.10354	0.171803	1.10566	1.22335	0.127485	0.839593	MM10000000004880227	0.844122	NA	NA	yes	yes	yes	yes	yes	no	no	yes	no	Olfr1507 (-583455)	OR4E2 (+433143)	0.094944	no	1.07047	no	-0.77367
chr14	55243283	55243783	mm10_chr14.55243283.55243783	2.69852	0.000630629	1.54244	1.753	1.06288	0.632728	1.00338	1.35771	1.36201	2.98501	1.16234	1.3677	0.818015	1.36793	MM10000000004891048	0.973694	NA	NA	yes	yes	yes	yes	yes	yes	yes	no	NA	Dhrs2 (+21526)	NA	0.025978	no	0.573864	no	-0.747107
chr14	58003822	58004322	mm10_chr14.58003822.58004322	2.92454	8.72e-18	1.40876	2.51077	1.97239	2.38335	2.70714	1.06941	2.38744	2.97027	1.04617	2.13385	1.32235	1.99199	MM10000000004904851	0.997109	NA	NA	yes	yes	yes	yes	yes	yes	yes	yes	no	Micu2 (-4810)	MICU2 (-3537)	0.539726	yes	0.0922414	no	-0.0635628
chr14	58522155	58522655	mm10_chr14.58522155.58522655	2.40914	6.64e-07	1.55868	2.6321	0.471697	2.51095	2.73194	3.30502	1.56595	0.998408	1.24529	2.159	0.371987	1.77737	MM10000000004907443	0.986333	NA	NA	yes	yes	yes	yes	yes	yes	yes	yes	no	Fgf9 (+449719)	FGF9 (+450333)	0.210766	no	0.971593	no	-0.366825
chr14	58824022	58824522	mm10_chr14.58824022.58824522	1.51163	0.000486014	1.90107	3.21556	0.936917	1.32321	1.50003	1.83392	0.751194	1.30826	1.29421	2.50001	0.528217	1.55387	MM10000000004908952	0.997231	NA	0.990904	yes	yes	yes	yes	yes	yes	yes	no	NA	1700129C05Rik (+318621)	NA	0.03513	yes	0.358034	no	0.66395
chr14	59643480	59643980	mm10_chr14.59643480.59643980	2.22065	2.83e-06	1.68432	1.84397	0.763218	1.82336	2.26508	2.25971	1.99292	1.61316	1.42726	1.3393	0.839369	1.62288	MM10000000004913049	0.994665	NA	0.99899	yes	yes	yes	yes	yes	yes	yes	yes	no	Shisa2 (+18422)	LHFPL3 (+340253)	0.068834	no	0.938051	no	-0.446331
chr14	59684856	59685356	mm10_chr14.59684856.59685356	2.30522	2.67e-06	2.45489	3.11162	0.986511	0.832774	1.50792	1.08076	1.77363	2.59753	1.88953	2.52412	0.90319	1.7875	MM10000000004913256	0.998688	NA	NA	no	yes	yes	yes	yes	yes	yes	yes	no	Shisa2 (+59798)	SHISA2 (+82578)	0.055594	yes	0.960622	no	1.27213
chr14	59685132	59685632	mm10_chr14.59685132.59685632	2.30522	2.67e-06	1.6903	2.42905	1.71739	0.959395	1.33135	1.69301	2.08542	1.35006	1.26495	1.92577	1.42176	1.62441	MM10000000004913257	0.984352	NA	0.988124	yes	yes	yes	yes	yes	yes	yes	yes	no	Shisa2 (+60074)	SHISA2 (+82902)	-0.07284	yes	0.538642	no	0.172726
chr14	59759197	59759697	mm10_chr14.59759197.59759697	1.79169	0.00205589	1.84398	2.208	0.942064	1.76487	1.49231	1.82346	2.11735	1.5284	1.55649	1.75029	0.962636	1.63544	MM10000000004913628	0.994633	NA	NA	yes	yes	yes	yes	yes	yes	yes	yes	no	Shisa2 (+134139)	SHISA2 (+168945)	0.178408	yes	0.830184	yes	0.937258
chr14	59956398	59956898	mm10_chr14.59956398.59956898	2.24311	2.21e-05	1.40911	1.24462	1.15244	1.40826	1.35967	1.45972	1.91339	0.729873	1.13425	1.16688	0.902473	1.26188	MM10000000004914614	0.844833	0.996691	0.992756	yes	yes	yes	yes	yes	yes	yes	yes	no	Atp8a2 (+130186)	ATP8A2 (+290140)	-0.00214	yes	1.15372	no	0.362586
chr14	61125348	61125848	mm10_chr14.61125348.61125848	2.24235	0.00203137	0.953885	2.35828	1.52648	1.70645	1.96031	2.21349	1.4965	2.69804	0.849303	2.03801	1.07931	1.71637	MM10000000004920458	0.996792	NA	NA	yes	yes	yes	yes	yes	yes	yes	no	NA	Sacs (-12859)	NA	-0.00837	no	0.436193	yes	1.27158
chr14	61125659	61126159	mm10_chr14.61125659.61126159	2.24235	0.00203137	1.33081	2.47829	0.257483	0.284086	0.537747	1.47291	0.320657	1.78718	1.00019	1.81275	0.210094	1.04475	MM10000000004920460	NA	NA	NA	yes	yes	yes	yes	yes	yes	yes	no	NA	Sacs (-12548)	NA	-0.08026	no	0.238168	yes	-0.331978
chr14	62782622	62783122	mm10_chr14.62782622.62783122	3.14539	1.28e-11	1.95818	2.78315	1.74808	1.62441	1.37833	1.98464	2.07422	3.07783	1.42978	2.01982	1.41546	1.95399	MM10000000004928745	0.985846	NA	0.99807	yes	yes	yes	yes	yes	yes	yes	yes	no	Ints6 (-21760)	INTS6 (-24018)	0.298096	yes	0.555704	yes	0.924847
chr14	66561389	66561889	mm10_chr14.66561389.66561889	2.17554	0.000139275	1.93737	2.60585	1.83444	1.96577	2.0247	1.60304	2.62927	3.37131	1.30905	2.02061	1.27984	2.05284	MM10000000004947639	0.995258	NA	NA	no	yes	yes	no	yes	no	no	yes	no	Adra1a (-73702)	ADRA1A (-89948)	0.451646	yes	0.0452768	yes	1.1877
chr14	66561653	66562153	mm10_chr14.66561653.66562153	2.17554	0.000139275	1.52722	1.29225	1.39149	1.69205	2.22065	1.83531	2.68498	0.950113	1.12875	0.951921	1.04669	1.52013	MM10000000004947640	0.9681	NA	NA	yes	yes	yes	no	yes	no	no	yes	no	Adra1a (-73438)	ADRA1A (-89659)	0.254514	yes	0.579593	yes	1.77459
chr14	67485280	67485780	mm10_chr14.67485280.67485780	2.33557	7.01e-10	1.53368	0.0658284	1.85125	0.600455	1.15283	0.696705	1.53396	0.949672	1.09264	0.129348	1.18532	0.981063	MM10000000004952258	0.991076	0.999109	0.995472	yes	yes	yes	yes	yes	no	no	yes	no	Cdca2 (+230080)	EBF2 (+260647)	0.083112	no	0.684832	no	0.76243
chr14	67784193	67784693	mm10_chr14.67784193.67784693	2.24038	2.24e-05	0.896628	1.5478	2.63617	0.265876	0.404542	0.576121	2.36477	1.95366	0.80477	1.28196	1.66279	1.30864	MM10000000004953753	0.984392	NA	0.983752	yes	yes	yes	yes	yes	yes	yes	yes	no	Gnrh1 (+39175)	GNRH1 (+54607)	-0.000999999	no	0.102847	yes	0.23692
chr14	67874988	67875488	mm10_chr14.67874988.67875488	2.19794	1e-06	2.00988	2.12506	0.957029	2.00857	2.26783	1.69077	0.785994	0.91379	1.34151	1.5595	0.444748	1.46406	MM10000000004954207	0.997041	NA	NA	yes	yes	yes	yes	no	yes	no	yes	no	Dock5 (+58194)	DOCK5 (+67618)	0.156788	yes	1.09684	no	0.376354
chr14	70061524	70062024	mm10_chr14.70061524.70062024	2.19206	8.85e-05	2.02793	3.04627	1.06125	1.40568	1.77947	1.37869	2.19676	3.24687	1.5963	2.44121	0.968922	1.92267	MM10000000004965139	0.999299	NA	NA	yes	yes	yes	no	yes	no	no	yes	no	Egr3 (-15540)	EGR3 (-18134)	-0.028696	no	0.699	no	0.00773344
chr14	70061916	70062416	mm10_chr14.70061916.70062416	2.19206	8.85e-05	1.05345	1.22903	0.620074	0.684237	0.831495	0.987473	0.921083	2.65535	0.994412	0.97812	0.433455	1.03529	MM10000000004965141	NA	NA	NA	yes	no	yes	no	yes	yes	no	yes	no	Egr3 (-15148)	EGR3 (-17739)	0.236344	no	0.440465	no	-0.654717
chr14	71133498	71133998	mm10_chr14.71133498.71133998	2.85398	1.72e-11	1.27044	1.48933	0.898154	1.43672	1.62498	1.57449	0.875654	1.53107	1.01094	1.19983	0.470378	1.21654	MM10000000004970499	0.998155	NA	0.979926	yes	yes	yes	yes	yes	yes	yes	yes	no	Gfra2 (+243618)	GFRA2 (+236766)	0.079868	no	1.00241	no	0.365213
chr14	71134668	71135168	mm10_chr14.71134668.71135168	2.40599	0.00454261	1.813	3.39414	1.04189	1.22196	1.43372	1.96454	2.1397	3.12333	1.45217	2.58015	0.911745	1.91603	MM10000000004970505	0.99664	0.999985	NA	yes	yes	yes	yes	yes	yes	yes	yes	no	Gfra2 (+244788)	GFRA2 (+237706)	0.12075	no	0.80124	no	1.00634
chr14	71184784	71185284	mm10_chr14.71184784.71185284	2.32516	0.000294174	0.86054	0.100244	1.38796	0.525468	0.669626	1.00759	1.21332	0.205055	0.744252	0.363712	1.01967	0.736131	MM10000000004970756	0.649754	NA	0.995002	yes	yes	yes	yes	yes	no	no	no	NA	Gfra2 (+294904)	NA	0.00804583	no	0.666882	no	0.220194
chr14	71199087	71199587	mm10_chr14.71199087.71199587	2.54669	1.58e-16	1.86622	2.73906	1.34198	2.21961	2.65318	2.70637	2.60139	1.40753	1.23844	2.08773	1.21774	2.0072	MM10000000004970827	0.991645	NA	0.995271	yes	yes	yes	yes	yes	yes	yes	yes	no	Gfra2 (+309207)	GFRA2 (+296161)	0.21246	yes	0.768144	yes	0.726649
chr14	73394511	73395011	mm10_chr14.73394511.73395011	2.23045	0.000325316	0.945825	0.620487	1.85027	0.549932	0.637733	0.438225	1.58192	1.25087	0.772966	0.574183	1.47271	0.972284	MM10000000004981804	0.294518	NA	NA	yes	yes	yes	yes	no	no	no	yes	no	Itm2b (-9490)	ITM2B (-8146)	0.118034	no	0.128505	yes	-0.160782
chr14	74025815	74026315	mm10_chr14.74025815.74026315	1.77007	0.000216582	1.661	1.35986	2.82091	0.994029	0.975787	0.86396	2.47599	2.5914	1.28534	1.14138	2.19264	1.6693	MM10000000004984961	0.880693	NA	0.999487	yes	yes	yes	no	yes	yes	no	yes	no	Sucla2 (+473400)	SUCLA2 (+502193)	0.202306	yes	0.599883	yes	0.593418
chr14	74218074	74218574	mm10_chr14.74218074.74218574	2.10646	0.00119796	1.32965	0.04186	1.45668	0.274366	0.338683	0.254991	0.455186	0.303474	0.999984	0.0869046	1.24928	0.617369	MM10000000004985922	0.834602	NA	0.993503	yes	yes	yes	no	yes	yes	no	yes	no	Htr2a (-422516)	HTR2A (-385127)	0.213816	yes	0.679905	yes	0.762409
chr14	74673477	74673977	mm10_chr14.74673477.74673977	2.73499	2.47e-05	1.07608	2.74283	0.331302	2.02099	2.07409	2.01637	1.81557	0.969089	1.00034	2.02691	0.381616	1.49593	MM10000000004988199	0.966954	NA	NA	yes	yes	yes	yes	yes	yes	yes	yes	no	Htr2a (+32887)	HTR2A (+31807)	0.029656	no	0.205759	no	-0.402355
chr14	75077823	75078323	mm10_chr14.75077823.75078323	1.89393	0.00323927	1.00005	1.06738	0.916573	0.103523	0.123195	0.414904	0.0437615	1.99119	0.930516	0.843622	0.770477	0.745927	MM10000000004990221	0.79886	NA	NA	yes	yes	yes	no	no	yes	no	yes	no	Lrrc63 (+52808)	LCP1 (-75248)	0.15119	yes	0.718651	yes	0.217126
chr14	79140796	79141296	mm10_chr14.79140796.79141296	2.08114	1.66e-09	1.70557	1.60356	0.146978	0.0632015	0.527834	0.268489	0.866519	0.439336	1.17324	1.27272	0.0397006	0.737013	MM10000000005010536	0.895522	NA	NA	yes	yes	yes	yes	yes	yes	yes	yes	no	Zfp957 (+106250)	RGCC (+181837)	0.034284	yes	0.963496	yes	0.556215
chr14	79289384	79289884	mm10_chr14.79289384.79289884	1.96455	0.000119063	1.19105	2.29878	1.88891	1.31633	1.28452	1.83273	3.47437	2.44702	1.00049	1.73733	1.44447	1.81055	MM10000000005011279	0.994698	NA	NA	yes	yes	yes	yes	yes	yes	yes	yes	no	Rgcc (+12011)	RGCC (+12343)	-0.011078	yes	0.222284	no	0.990642
chr14	79856531	79857031	mm10_chr14.79856531.79857031	1.92989	0.000770432	0.831403	1.33055	1.66735	0.323804	0.57824	0.675748	2.02297	0.24144	0.595339	1.00851	1.38062	0.968725	MM10000000005014114	0.940521	NA	0.985006	yes	yes	yes	yes	yes	no	no	yes	no	Pcdh8 (-85469)	PCDH8 (-62210)	0.309612	no	-0.360627	yes	0.503007
chr14	83587042	83587542	mm10_chr14.83587042.83587542	1.78371	2.69e-10	1.90482	1.04925	0.717535	0.743157	1.29782	0.614829	1.09323	0.800958	1.27848	1.05428	0.690173	1.02223	MM10000000005032767	0.985937	NA	NA	no	yes	yes	no	yes	no	no	no	NA	Pcdh17 (-856271)	NA	0.013694	yes	0.239712	no	1.49637
chr14	84495454	84495954	mm10_chr14.84495454.84495954	2.99214	3.25e-20	1.60747	2.17152	2.55356	2.58175	2.74865	2.18225	2.94495	0.856731	1.01866	1.71094	1.83265	2.01901	MM10000000005037309	0.995204	NA	0.998688	yes	yes	yes	yes	yes	yes	yes	yes	no	Pcdh17 (+52141)	PCDH17 (+54970)	0.130216	no	0.338967	no	0.989826
chr14	92828959	92829459	mm10_chr14.92828959.92829459	2.30327	1.46e-09	0.46357	0.880505	0.951604	1.99317	1.58985	1.74891	1.25712	0.322674	0.15705	0.645908	0.758873	0.979021	MM10000000005078977	0.95268	NA	NA	yes	yes	yes	yes	yes	no	no	yes	no	NONE	NONE	0.864668	no	-0.0801373	no	0.919054
chr14	92829065	92829565	mm10_chr14.92829065.92829565	2.30327	1.46e-09	0.614135	1.21715	0.900331	1.82027	1.22175	1.57914	1.39841	0.419248	0.362481	1.0271	0.523644	1.00761	MM10000000005078977	0.95268	NA	NA	yes	yes	yes	yes	yes	no	no	yes	no	NONE	NONE	0.70489	no	-0.155018	no	0.426779
chr14	100511063	100511563	mm10_chr14.100511063.100511563	1.64297	0.0064951	1.26012	1.94397	2.65963	2.9155	2.85936	2.26171	2.71717	0.846059	0.975721	1.41166	2.00836	1.98721	MM10000000005117387	0.928668	NA	0.998956	yes	yes	yes	yes	yes	yes	yes	yes	no	Klf12 (-361549)	KLF12 (-358303)	0.03759	yes	0.464197	yes	1.19226
chr14	100960765	100961265	mm10_chr14.100960765.100961265	2.33906	4.25e-08	1.37001	2.04284	1.64305	2.31528	2.49128	1.9933	1.45764	0.392542	1.0004	1.54542	1.17722	1.58445	MM10000000005119636	0.989436	NA	0.990785	yes	yes	yes	yes	yes	no	no	yes	no	Prr30 (+239315)	TBC1D4 (+712075)	0.343798	no	0.303094	no	1.249
chr14	101573043	101573543	mm10_chr14.101573043.101573543	1.91378	0.000282698	0.937323	2.91204	1.15755	3.29451	3.14693	3.07414	1.13469	2.42896	0.619638	2.21574	0.846304	1.97889	MM10000000005122697	0.98459	NA	NA	yes	yes	yes	yes	yes	yes	yes	yes	no	Tbc1d4 (+35740)	TBC1D4 (+39112)	0.064854	yes	-0.105997	yes	-0.743325
chr14	110225115	110225615	mm10_chr14.110225115.110225615	1.84074	0.00112016	1.19375	1.01551	0.846241	0.956674	1.03902	1.36498	1.14782	1.24816	1.00001	1.01229	0.452821	1.02521	MM10000000005165957	0.747988	NA	NA	yes	yes	yes	yes	yes	yes	yes	no	NA	Slitrk6 (+529784)	NA	0.134114	no	0.323247	no	1.39069
chr14	111210500	111211000	mm10_chr14.111210500.111211000	2.42763	1.73e-13	1.05223	1.41645	2.03429	1.60462	1.57162	2.31162	1.4865	1.47547	0.858675	1.20556	1.4204	1.49431	MM10000000005170884	0.97286	NA	NA	yes	yes	yes	yes	yes	yes	yes	yes	no	Slitrk6 (-455601)	SLITRK5 (-644853)	0.267238	no	0.120965	no	1.50948
chr14	111320974	111321474	mm10_chr14.111320974.111321474	2.13663	0.00024011	1.01618	1.54621	1.09262	1.79266	1.81384	1.7704	1.68013	1.17403	0.829542	1.25377	0.706036	1.33413	MM10000000005171437	0.985629	NA	0.997408	yes	yes	yes	yes	yes	yes	yes	no	NA	Slitrk5 (-353891)	NA	0.08075	no	0.210878	no	1.3992
chr14	111353465	111353965	mm10_chr14.111353465.111353965	1.71754	0.000503432	0.999538	1.1567	2.09346	1.16553	1.55419	1.10736	1.51477	0.253671	1.00009	1.20715	1.56319	1.23779	MM10000000005171599	0.841884	NA	0.993321	yes	yes	yes	yes	yes	yes	yes	yes	no	Slitrk5 (-321400)	SLITRK5 (-398571)	0.434048	yes	0.153293	no	1.20546
chr14	117214318	117214818	mm10_chr14.117214318.117214818	1.83703	3.4e-05	1.00639	0.935496	0.788041	1.10094	1.16501	0.510758	2.20125	0.241838	0.717239	0.929571	0.671222	0.933432	MM10000000005200903	0.979337	NA	0.99691	yes	yes	yes	yes	yes	yes	yes	yes	no	Gpc6 (+289037)	GPC6 (+363101)	0.72154	yes	0.243694	yes	0.997
chr14	117573571	117574071	mm10_chr14.117573571.117574071	1.82323	3.32e-05	0.625029	0.999841	0.448745	0.484168	0.349394	0.65079	0.523979	0.0379153	0.480906	0.899114	0.417936	0.537983	MM10000000005202700	0.9867	NA	NA	yes	yes	yes	yes	yes	no	no	yes	no	Dct (+478425)	DCT (+498012)	0.523512	yes	0.294064	no	0.826331
chr14	120561997	120562497	mm10_chr14.120561997.120562497	1.86776	0.00691308	1.00012	1.78737	0.644801	0.14503	0.296695	0.90991	1.28057	1.97516	0.737854	1.34643	0.450908	0.96135	MM10000000005217642	0.556071	NA	NA	yes	yes	yes	no	yes	yes	no	yes	no	Rap2a (+83786)	RAP2A (+94428)	0.06526	no	0.16547	no	-0.64501
chr14	120846389	120846889	mm10_chr14.120846389.120846889	1.82768	8.48e-06	2.04146	2.76286	2.32669	2.25622	2.54682	2.55315	3.48321	2.77202	1.71944	2.161	1.82558	2.4044	MM10000000005219064	0.999221	NA	NA	yes	yes	yes	yes	yes	yes	yes	yes	no	Ipo5 (-64555)	IPO5 (-70659)	0.016556	yes	0.796045	yes	0.47446
chr14	120846884	120847384	mm10_chr14.120846884.120847384	1.82768	8.48e-06	1.31788	2.16424	1.56297	1.30763	1.07418	1.40731	2.00436	1.46814	0.999712	1.7377	1.23829	1.48022	MM10000000005219066	0.981996	NA	0.991251	yes	yes	yes	yes	yes	yes	yes	yes	no	Ipo5 (-64060)	IPO5 (-70207)	0.288018	yes	0.435841	yes	0.373509
chr14	121011224	121011724	mm10_chr14.121011224.121011724	3.08037	1.05e-06	1.13483	1.22164	2.63258	2.67098	2.8523	1.80076	3.03415	0.877205	0.999868	1.00912	1.95849	1.83563	MM10000000005219888	0.997661	NA	NA	yes	yes	yes	yes	yes	yes	yes	no	NA	Farp1 (-24090)	NA	0.0814361	no	0.783389	no	-0.508325
chr15	7289432	7289932	mm10_chr15.7289432.7289932	2.05743	6.5e-05	1.50721	1.97566	0.187229	2.29482	2.81617	2.49717	0.550237	0.362893	1.24506	1.82653	0.0270029	1.39	MM10000000004131066	0.989369	NA	0.979667	yes	yes	yes	yes	yes	yes	yes	yes	no	Egflam (+108669)	EGFLAM (+112154)	0.311702	no	0.830887	no	-0.557666
chr15	11680629	11681129	mm10_chr15.11680629.11681129	2.38598	0.00015516	0.683249	1.60393	2.35468	1.19041	1.04157	1.75152	1.90542	0.552812	0.367339	1.14651	1.88514	1.3166	MM10000000004153022	0.961399	NA	0.992856	yes	yes	no	yes	yes	no	no	no	NA	Npr3 (+224795)	NA	0.136215	no	-0.226102	no	0.970059
chr15	12955315	12955815	mm10_chr15.12955315.12955815	2.65579	3.49e-15	0.876696	0.734983	0.454431	1.07108	1.50492	1.34716	0.621962	0.0941945	0.943723	0.767705	0.224409	0.785569	MM10000000004159395	0.952065	NA	NA	yes	yes	yes	yes	yes	yes	yes	no	NA	Drosha (+130750)	NA	0.11139	yes	0.541676	yes	0.299521
chr15	15988272	15988772	mm10_chr15.15988272.15988772	2.17656	0.000154511	1.00004	0.537134	1.01325	0.595241	0.336122	0.395749	1.21102	0.26834	0.605605	0.594692	0.840493	0.672517	MM10000000004174560	0.928093	NA	0.986625	yes	yes	yes	yes	yes	no	no	yes	no	Cdh9 (-789579)	CDH9 (-885410)	0.762052	no	-0.179814	no	1.09322
chr15	22390204	22390704	mm10_chr15.22390204.22390704	2.5282	5.91e-07	0.547039	1.69267	2.35604	1.54119	1.56587	1.70405	3.1429	1.34348	0.36336	1.28514	1.57283	1.55587	MM10000000004206570	0.998634	NA	0.998808	yes	yes	yes	yes	yes	yes	yes	yes	no	Cdh18 (-646009)	CDH18 (-171529)	0.38618	no	-0.596894	no	0.657711
chr15	25808704	25809204	mm10_chr15.25808704.25809204	2.67635	2.16e-09	1.46372	2.78133	2.91804	3.15708	3.33354	2.82842	3.39094	2.4388	1.13308	2.11514	2.16844	2.52078	MM10000000004223662	0.999345	NA	0.99857	yes	yes	yes	yes	yes	yes	yes	yes	no	Retreg1 (-34310)	RETREG1 (-52970)	0.020794	no	0.664074	no	0.698041
chr15	26831815	26832315	mm10_chr15.26831815.26832315	2.15232	0.000590135	1.83049	1.57588	1.46873	1.83112	1.97887	1.48498	2.37012	0.0400884	1.2379	1.28192	1.07841	1.47077	MM10000000004228778	0.986849	NA	NA	yes	yes	yes	yes	yes	no	no	yes	no	Fbxl7 (+62984)	FBXL7 (+68867)	-0.057508	yes	0.620411	no	0.889945
chr15	28215271	28215771	mm10_chr15.28215271.28215771	2.38012	5.81e-09	1.24064	3.32074	1.18545	0.81492	0.389926	1.8134	2.30558	3.41135	1.00011	2.58387	1.04414	1.73728	MM10000000004235695	0.990279	NA	NA	no	yes	yes	yes	yes	yes	yes	yes	no	Dnah5 (+11769)	DNAH5 (+9717)	0.0801712	no	0.392807	no	1.33987
chr15	36431081	36431581	mm10_chr15.36431081.36431581	2.53885	0.000372047	1.00014	1.88188	0.617818	0.826093	0.848915	0.713174	0.259171	0.245784	0.577098	1.13472	0.268611	0.761219	MM10000000004276774	NA	NA	NA	yes	yes	yes	yes	yes	yes	yes	yes	no	Ankrd46 (+65460)	ANKRD46 (+89522)	0.0911637	no	0.224285	no	-0.314189
chr15	37543025	37543525	mm10_chr15.37543025.37543525	2.23695	4.88e-08	1.67424	1.78611	0.541131	0.758654	0.790044	1.19841	1.14624	1.7621	1.13366	1.3496	0.23237	1.12478	MM10000000004282334	0.902957	NA	NA	yes	yes	yes	yes	yes	no	no	yes	no	4930447A16Rik (+117721)	NCALD (+260799)	0.073854	yes	0.244597	yes	-0.58069
chr15	37649662	37650162	mm10_chr15.37649662.37650162	2.22854	0.00024112	1.49762	2.26173	1.86221	1.66941	1.57662	1.61552	1.76707	1.71712	0.999752	1.62701	1.35785	1.63199	MM10000000004282867	0.98558	NA	NA	yes	yes	yes	yes	yes	no	no	yes	no	Ncald (+142521)	NCALD (+143583)	0.248086	no	0.36081	no	1.13876
chr15	37649892	37650392	mm10_chr15.37649892.37650392	2.22854	0.00024112	1.28701	1.37163	0.440581	1.26005	1.54104	2.02516	1.10155	0.333423	0.999931	1.09784	0.137637	1.05417	MM10000000004282868	0.998019	NA	NA	yes	yes	yes	yes	yes	no	no	yes	no	Ncald (+142291)	NCALD (+143172)	0.22811	no	0.454792	no	-0.421017
chr15	40984544	40985044	mm10_chr15.40984544.40985044	2.23378	7.92e-09	1.22887	2.34805	0.716975	2.0913	1.78512	2.43865	1.1432	2.80357	0.999896	1.83672	0.61435	1.63697	MM10000000004299541	0.991245	NA	NA	yes	yes	yes	yes	yes	yes	yes	yes	no	Zfpm2 (+329752)	ZFPM2 (+349687)	0.469138	yes	0.336446	yes	1.26962
chr15	41643344	41643844	mm10_chr15.41643344.41643844	2.0266	8.94e-06	0.816285	0.97319	1.40752	0.654645	0.534506	0.959267	0.938297	0.422733	0.747096	0.975273	0.940145	0.851723	MM10000000004302835	0.859115	NA	NA	yes	yes	yes	yes	yes	no	no	yes	no	Oxr1 (+196112)	OXR1 (+63457)	0.275456	no	0.402077	no	0.751404
chr15	41877825	41878325	mm10_chr15.41877825.41878325	2.27893	3.28e-05	1.23911	0.996551	4.32418	0.679741	0.657593	0.271445	5.18139	2.02639	0.857886	0.845162	3.27193	1.85013	MM10000000004304008	0.951772	NA	NA	yes	yes	yes	yes	yes	yes	yes	yes	no	Abra (-8355)	ABRA (-13051)	0.090398	no	-0.289105	no	1.27018
chr15	41910988	41911488	mm10_chr15.41910988.41911488	1.95061	0.00187079	0.589374	1.11682	1.8621	1.85622	2.12741	1.92934	2.68997	0.354508	0.219465	0.734191	1.1723	1.33197	MM10000000004304174	0.955457	NA	0.998494	yes	yes	yes	yes	yes	yes	yes	yes	no	Abra (-41518)	ABRA (-42903)	0.158796	no	-0.643486	no	-0.0943777
chr15	43964058	43964558	mm10_chr15.43964058.43964558	2.46681	0.000284628	1.10985	2.27275	0.973326	1.48841	1.39526	2.21708	0.575072	1.2194	0.911797	1.61719	0.594954	1.30683	MM10000000004314439	0.977969	NA	NA	yes	yes	yes	yes	yes	yes	yes	yes	no	Tmem74 (-94279)	TMEM74 (-78738)	0.240462	yes	0.0682614	yes	1.60281
chr15	50385257	50385757	mm10_chr15.50385257.50385757	2.81038	1.31e-07	1.4626	5.28511	0.926468	4.5489	4.68431	4.8613	0.702426	3.051	1.00017	3.97466	0.465863	2.8148	MM10000000004346545	0.998282	NA	NA	yes	yes	yes	yes	yes	yes	yes	yes	no	Trps1 (+503542)	TRPS1 (+470141)	0.18734	yes	0.339836	no	0.819378
chr15	50984654	50985154	mm10_chr15.50984654.50985154	1.87289	0.00911046	0.577134	0.423362	0.902683	0.842993	0.344998	0.571935	0.874351	0.974458	0.392852	0.487259	0.718313	0.646394	MM10000000004349542	0.785507	NA	0.985805	yes	yes	yes	yes	yes	yes	yes	yes	no	Trps1 (-95855)	TRPS1 (-99994)	0.001028	no	-0.287012	no	1.59378
chr15	58151569	58152069	mm10_chr15.58151569.58152069	1.86996	0.00277573	0.999864	1.55871	0.909593	1.73381	1.89446	2.2012	1.16982	1.77897	0.999913	1.30689	0.523485	1.37061	MM10000000004385377	0.968401	NA	0.981494	yes	yes	yes	yes	yes	yes	yes	no	NA	Wdyhv1 (+10383)	NA	0.07564	no	0.624352	no	0.187772
chr15	59652766	59653266	mm10_chr15.59652766.59653266	1.74156	4.79e-06	1.55607	1.50339	0.496598	0.459145	0.740342	0.500935	2.04101	0.414495	1.1238	1.35611	0.438981	0.966443	MM10000000004392883	0.977393	NA	NA	yes	yes	yes	yes	no	yes	no	yes	yes	Trib1 (+4666)	TRIB1 (+4459)	0.810742	yes	0.671108	yes	0.665186
chr15	59775756	59776256	mm10_chr15.59775756.59776256	1.91452	5.03e-07	1.46013	1.68032	0.746289	1.57362	1.63929	1.62211	0.701767	1.76845	1.18808	1.45842	0.548817	1.30794	MM10000000004393498	0.985002	0.999939	0.997335	yes	yes	yes	yes	yes	yes	yes	yes	no	Trib1 (+127656)	TRIB1 (+137977)	0.146578	yes	0.606674	yes	-0.265068
chr15	60159821	60160321	mm10_chr15.60159821.60160321	2.73053	1.24e-11	0.369637	1.43602	2.79758	0.524173	0.389268	0.505819	2.91148	0.233723	0.158453	0.999722	2.10792	1.13034	MM10000000004395418	0.965373	NA	0.999341	yes	yes	yes	yes	yes	yes	yes	no	NA	4933412E24Rik (-143453)	NA	0.052442	no	-0.634284	yes	1.29896
chr15	60270121	60270621	mm10_chr15.60270121.60270621	1.84303	2.44e-06	1.97651	1.83839	2.03269	2.50575	2.57037	2.45853	2.56901	0.681155	1.35186	1.40553	1.44618	1.89418	MM10000000004395969	0.975081	NA	0.998919	yes	yes	yes	yes	yes	no	no	no	NA	4933412E24Rik (-253753)	NA	0.096502	no	0.515629	no	0.956626
chr15	61619495	61619995	mm10_chr15.61619495.61619995	1.7695	0.00526404	1.85825	2.74703	2.13121	0.408424	1.47419	1.15983	2.77511	1.59692	1.15974	2.1348	1.53771	1.72575	MM10000000004402716	NA	NA	NA	no	yes	yes	yes	yes	no	no	yes	no	Myc (-365646)	POU5F1B (-12478)	0.7262	no	-0.12359	no	0.417267
chr15	61619716	61620216	mm10_chr15.61619716.61620216	1.7695	0.00526404	2.09367	2.23174	1.90692	1.19307	1.45759	1.92557	1.69267	1.11412	1.5655	1.66581	1.15347	1.63638	MM10000000004402717	0.996483	NA	0.995654	yes	yes	yes	yes	yes	no	no	yes	no	Myc (-365425)	POU5F1B (-12252)	0.492092	no	1.0642	no	1.13475
chr15	62014754	62015254	mm10_chr15.62014754.62015254	2.48537	1.46e-06	1.68022	2.41519	0.380253	1.73298	1.93274	2.17184	0.783948	1.96617	1.47005	1.85845	0.431361	1.52938	MM10000000004404693	0.978772	NA	NA	yes	yes	yes	yes	yes	yes	yes	yes	no	Myc (+29613)	MYC (+44550)	0.016368	no	0.772252	no	0.876934
chr15	62571771	62572271	mm10_chr15.62571771.62572271	2.46901	3.2e-18	2.81581	2.57182	0.804909	3.01702	3.20037	2.69287	0.526279	0.579167	2.13111	2.13734	0.549847	1.9115	MM10000000004407478	0.999323	NA	0.994477	yes	yes	yes	yes	yes	yes	yes	yes	no	Myc (+586630)	MYC (+693996)	0.3053	yes	1.45788	yes	1.51818
chr15	62908156	62908656	mm10_chr15.62908156.62908656	1.99005	0.00010029	1.91894	1.94552	1.32025	0.889537	1.19008	1.0238	1.19693	0.114785	1.25049	1.37088	1.10618	1.21158	MM10000000004409160	0.935283	0.997069	0.992983	yes	yes	yes	yes	yes	yes	yes	yes	no	Gsdmc (+900353)	GSDMC (+987241)	0.612858	yes	0.132531	no	0.143511
chr15	62920475	62920975	mm10_chr15.62920475.62920975	2.45695	1.47e-15	1.46253	1.72353	2.39963	2.56362	2.30297	2.30101	3.05206	1.68014	1.04528	1.28333	1.78228	1.96331	MM10000000004409221	0.985089	NA	0.998658	yes	yes	yes	yes	yes	yes	yes	yes	no	Gsdmc (+888034)	GSDMC (+971336)	0.153772	yes	-0.0423209	yes	0.714622
chr15	63012190	63012690	mm10_chr15.63012190.63012690	2.06956	4.77e-05	0.52248	0.604364	2.02983	0.885135	0.51216	0.728414	2.03002	1.89787	0.47651	0.597982	1.68284	1.08796	MM10000000004409680	0.322679	NA	0.99893	yes	yes	yes	yes	yes	yes	yes	yes	no	Gsdmc (+796319)	GSDMC (+849058)	0.501006	no	-0.124637	no	0.848094
chr15	63155659	63156159	mm10_chr15.63155659.63156159	2.20322	5.61e-05	1.8788	1.77718	2.62268	1.48397	1.61585	1.21159	3.96353	1.2936	1.2393	1.42232	1.99501	1.86398	MM10000000004410397	0.998851	NA	NA	yes	yes	yes	yes	yes	yes	yes	yes	no	Gsdmc (+652850)	GSDMC (+717768)	0.24924	no	0.18894	yes	0.654459
chr15	65552836	65553336	mm10_chr15.65552836.65553336	2.37076	0.00349026	2.66931	4.70997	1.61688	3.54519	3.36966	3.91145	3.53771	1.39705	1.7197	3.48317	1.05961	2.81997	MM10000000004422383	0.997569	NA	NA	yes	yes	yes	yes	yes	no	no	yes	no	Efr3a (-233954)	EFR3A (-180473)	0.318818	no	0.818213	yes	1.57689
chr15	66852300	66852800	mm10_chr15.66852300.66852800	2.49725	5.47e-05	0.999886	0.488889	1.9501	0.390982	0.667903	0.703468	1.78015	0.250135	0.960739	0.46674	1.67668	0.939607	MM10000000004428880	0.984038	NA	NA	yes	yes	yes	yes	yes	no	no	yes	no	Sla (-20721)	WISP1 (-52577)	0.002432	no	0.111556	yes	0.994541
chr15	67254325	67254825	mm10_chr15.67254325.67254825	2.40845	3.59e-10	1.47206	2.22082	1.07829	2.15959	2.13043	2.69291	1.92467	1.64821	0.999962	1.97285	0.771324	1.73374	MM10000000004430890	0.98399	NA	0.99277	yes	yes	yes	yes	yes	yes	yes	no	NA	St3gal1 (-140583)	NA	0.05966	no	0.762256	no	0.971219
chr15	68689741	68690241	mm10_chr15.68689741.68690241	2.32224	2.77e-15	1.89845	4.18034	1.64409	2.47393	2.35782	3.0228	3.29054	2.14049	1.21292	3.16233	1.40284	2.43514	MM10000000004438067	0.988079	NA	NA	yes	yes	yes	yes	yes	yes	yes	yes	no	Khdrbs3 (-238429)	KHDRBS3 (-254662)	0.52422	yes	0.220534	yes	0.64259
chr15	68689976	68690476	mm10_chr15.68689976.68690476	2.32224	2.77e-15	2.14492	3.1025	1.8924	4.02959	3.79879	4.14285	1.98356	2.86188	1.48508	2.39327	1.62921	2.67855	MM10000000004438069	0.999614	NA	NA	yes	yes	yes	yes	yes	yes	yes	yes	no	Khdrbs3 (-238194)	KHDRBS3 (-254432)	0.778118	yes	0.574353	yes	2.76259
chr15	68690438	68690938	mm10_chr15.68690438.68690938	2.32224	2.77e-15	0.99967	0.732304	1.23354	0.474194	0.656847	0.583935	1.67919	2.36976	0.7372	0.748346	0.891673	1.0097	MM10000000004438071	0.993556	NA	NA	no	no	no	no	no	no	no	yes	no	Khdrbs3 (-237732)	KHDRBS3 (-252284)	0.038288	yes	0.282676	yes	1.0447
chr15	69670551	69671051	mm10_chr15.69670551.69671051	2.35946	0.00222296	1.00008	2.35445	1.66848	2.38232	1.94875	2.311	2.35174	0.0665513	0.647084	1.83936	1.22319	1.61755	MM10000000004442972	0.675546	NA	NA	yes	yes	yes	yes	yes	no	no	no	NA	Khdrbs3 (+742381)	NA	-0.038628	no	0.0402564	no	1.62518
chr15	70993138	70993638	mm10_chr15.70993138.70993638	1.93503	0.000313368	1.61692	1.95831	0.707217	0.787652	0.937064	0.495642	1.6821	1.02822	1.1005	1.46377	0.326667	1.10037	MM10000000004449584	NA	NA	NA	yes	yes	yes	yes	yes	no	no	yes	no	Fam135b (+734450)	FAM135B (+905139)	0.0548793	yes	0.805534	yes	0.92378
chr15	70993274	70993774	mm10_chr15.70993274.70993774	1.93503	0.000313368	1.96478	2.37371	1.39242	2.64583	2.77761	1.89727	2.87367	2.48085	1.3505	1.9189	1.07703	2.06842	MM10000000004449585	0.985924	NA	NA	yes	yes	yes	yes	yes	no	no	yes	no	Fam135b (+734314)	FAM135B (+905064)	0.11042	yes	0.571591	yes	1.49547
chr15	71763232	71763732	mm10_chr15.71763232.71763732	1.92976	0.00516406	0.979412	1.82408	1.06444	0.383278	0.925313	1.36924	1.12861	0.700594	1.00001	1.45347	1.01963	1.0771	MM10000000004453435	0.949343	NA	0.995882	yes	yes	yes	yes	yes	no	no	yes	no	Fam135b (-35644)	FAM135B (-46839)	-0.210236	yes	1.01853	no	0.371643
chr15	73257908	73258408	mm10_chr15.73257908.73258408	2.08092	0.0053678	1.00001	1.08912	2.12184	0.424223	0.524151	0.166801	1.63561	2.56033	0.775087	0.977858	1.39861	1.15215	MM10000000004460908	0.791385	NA	0.999419	yes	yes	yes	no	yes	yes	no	yes	no	Ago2 (-73318)	AGO2 (-101851)	-0.04229	no	0.0971532	no	0.131057
chr15	77037300	77037800	mm10_chr15.77037300.77037800	2.07249	3.31e-06	1.39743	1.35188	1.66347	1.7885	1.92259	1.67183	1.88071	2.48386	0.999714	0.98548	1.31328	1.58716	MM10000000004479805	0.95023	NA	0.992534	yes	yes	yes	yes	yes	yes	yes	yes	no	Apol6 (-7525)	ELK1 (-1375)	0.03674	yes	0.441398	yes	0.563794
chr15	78195451	78195951	mm10_chr15.78195451.78195951	2.05045	5.08e-10	2.51718	2.16713	1.27787	1.48695	1.61526	1.26533	1.89637	1.25477	1.71645	1.95101	1.01412	1.65113	MM10000000004485596	0.997185	NA	0.984479	yes	yes	yes	yes	yes	no	no	yes	yes	Pvalb (+8536)	PVALB (+12453)	0.087808	no	1.05858	yes	1.23788
chr15	83333904	83334404	mm10_chr15.83333904.83334404	3.08274	1.8e-08	1.01996	1.61748	1.19178	0.947709	1.01032	1.64871	3.01505	1.83359	1.00016	1.38321	1.29941	1.45158	MM10000000004511288	0.992583	NA	NA	yes	yes	yes	yes	yes	no	no	yes	no	Arfgap3 (+16093)	ARFGAP3 (+22188)	0.030736	yes	0.784907	no	0.700995
chr15	83624316	83624816	mm10_chr15.83624316.83624816	3.50685	1.59e-08	1.16711	1.25123	2.11136	0.178469	0.363924	0.895777	1.92473	0.650179	0.999989	1.02678	1.74867	1.11984	MM10000000004512740	0.964832	NA	0.997441	yes	yes	no	no	yes	no	no	no	NA	Ttll12 (-29409)	NA	0.055646	no	0.762873	no	0.455523
chr15	83838794	83839294	mm10_chr15.83838794.83839294	2.74906	2.93e-08	2.46946	3.08013	0.616137	0.989298	1.12376	1.80065	0.644704	1.41954	1.81969	2.39113	0.126388	1.49826	MM10000000004513813	0.999236	NA	0.979337	no	yes	yes	no	no	no	no	no	NA	Mpped1 (+54215)	NA	0.057224	no	1.00453	no	-0.840069
chr15	84266231	84266731	mm10_chr15.84266231.84266731	2.79221	6.09e-05	1.46625	1.38797	2.99952	0.970374	0.802243	1.03212	3.41115	2.53328	1.00572	1.12399	2.3391	1.73379	MM10000000004515950	0.961759	NA	0.999062	yes	yes	yes	yes	yes	no	no	yes	no	Parvb (+34438)	PARVB (+88509)	0.09729	yes	0.534372	yes	1.92679
chr15	86048450	86048950	mm10_chr15.86048450.86048950	2.68908	4.33e-07	0.747698	1.13572	1.4865	1.11787	0.937654	1.21163	1.09107	0.66091	0.655901	1.04342	1.19547	1.0258	MM10000000004524861	0.993933	NA	NA	yes	yes	yes	yes	yes	no	no	yes	no	Gramd4 (-8995)	H3F3C (+1185)	0.18186	yes	-0.00725507	no	-0.109476
chr15	86300911	86301411	mm10_chr15.86300911.86301411	3.28783	8.31e-08	0.999938	1.63478	1.23941	0.399451	0.490047	0.874088	1.04623	2.94268	0.872231	1.49349	0.870161	1.16932	MM10000000004526123	0.998777	NA	0.985089	yes	yes	yes	yes	yes	yes	yes	yes	no	Tbc1d22a (+86702)	TBC1D22A (+131732)	0.206956	no	-0.000550517	no	-0.426155
chr15	86867828	86868328	mm10_chr15.86867828.86868328	1.749	0.00130915	0.79545	1.09556	0.785476	0.589051	0.553014	0.601334	1.12147	0.285388	0.530528	0.973747	0.474267	0.709571	MM10000000004528958	0.942992	NA	0.988444	yes	yes	yes	no	yes	no	no	yes	no	Tbc1d22a (+653619)	FAM19A5 (-784918)	0.053226	no	-0.0103207	yes	0.11457
chr15	86868008	86868508	mm10_chr15.86868008.86868508	1.749	0.00130915	0.712728	0.94958	0.430469	0.470669	0.360289	0.373	0.653624	0.0966008	0.593007	0.603745	0.539469	0.525744	MM10000000004528959	0.972769	NA	NA	yes	yes	yes	no	yes	no	no	yes	no	Tbc1d22a (+653799)	FAM19A5 (-784841)	0.000898	no	0.245056	yes	0.796611
chr15	86868209	86868709	mm10_chr15.86868209.86868709	1.749	0.00130915	1.68865	1.96173	1.16536	0.249245	0.491915	0.00423292	1.4664	1.01521	1.26935	1.48686	0.933977	1.06663	MM10000000004528960	0.996634	NA	NA	no	yes	yes	no	yes	no	no	yes	no	Tbc1d22a (+654000)	FAM19A5 (-784679)	0.05294	no	0.990804	yes	1.38347
chr15	87323986	87324486	mm10_chr15.87323986.87324486	2.80686	4.03e-08	1.64502	1.60204	1.02093	2.27381	2.67961	2.43628	2.98872	0.54388	1.19746	1.42616	0.759343	1.68848	MM10000000004531239	0.996054	NA	0.99612	yes	yes	yes	yes	yes	yes	yes	no	NA	Fam19a5 (-300994)	NA	0.088912	yes	1.13007	no	0.891408
chr15	87579832	87580332	mm10_chr15.87579832.87580332	2.37391	1.9e-12	0.99986	1.07908	1.8295	0.852997	1.07081	1.292	1.88775	0.905306	0.999861	1.05854	1.31735	1.20846	MM10000000004532518	0.907302	NA	0.991786	yes	yes	yes	yes	yes	yes	yes	yes	no	Fam19a5 (-45148)	FAM19A5 (+40854)	-0.006954	yes	0.83782	yes	-0.697913
chr15	88145617	88146117	mm10_chr15.88145617.88146117	1.95341	1.69e-05	1.66033	2.74545	1.34873	1.51609	1.5923	2.33652	1.86737	0.0993084	1.21976	2.20083	1.14054	1.61157	MM10000000004535347	0.997335	NA	NA	yes	yes	yes	yes	yes	yes	yes	no	NA	Zdhhc25 (-454435)	NA	0.097502	no	0.425251	no	-0.0134141
chr15	88146308	88146808	mm10_chr15.88146308.88146808	1.95341	1.69e-05	1.38162	2.25324	1.68055	0.565543	0.750253	1.37144	2.84275	1.46264	1.00008	1.8583	1.40442	1.50644	MM10000000004535350	NA	NA	NA	no	yes	yes	yes	no	no	no	no	NA	Zdhhc25 (-453744)	NA	0.071324	yes	0.0686633	yes	0.368084
chr15	88565947	88566447	mm10_chr15.88565947.88566447	3.17522	4.2e-14	1.83868	1.78174	0.55916	0.876454	0.732588	1.5673	0.837507	1.30633	1.45323	1.40091	0.392598	1.15877	MM10000000004537448	0.992743	NA	NA	yes	yes	yes	yes	yes	yes	yes	yes	no	Zdhhc25 (-34105)	BRD1 (+165663)	0.01205	yes	0.96564	no	0.783235
chr15	90346667	90347167	mm10_chr15.90346667.90347167	2.22141	7.04e-11	1.6267	0.943174	0.792275	0.579814	0.720683	0.86006	0.81763	0.434888	1.23855	0.95985	0.607986	0.871055	MM10000000004546352	0.975336	NA	NA	yes	yes	yes	yes	yes	yes	yes	yes	no	Alg10b (+122606)	ALG10B (+170291)	0.154784	yes	0.723842	yes	0.980083
chr15	90535731	90536231	mm10_chr15.90535731.90536231	2.39306	6.76e-10	1.00021	1.25589	0.666173	0.0168629	0.489176	0.593798	1.22691	0.786728	0.938706	1.07754	0.721536	0.797594	MM10000000004547297	0.987046	NA	0.986884	yes	yes	yes	yes	yes	yes	yes	yes	no	Cpne8 (+143451)	CPNE8 (+194432)	-0.024748	yes	0.147669	yes	1.46514
chr15	90806582	90807082	mm10_chr15.90806582.90807082	2.63439	9.3e-13	0.829344	1.19271	1.77651	2.06642	2.02713	2.57773	2.2649	2.3376	0.590611	1.08391	1.30616	1.64118	MM10000000004548652	0.937327	NA	0.992744	yes	yes	yes	yes	yes	yes	yes	yes	no	Cpne8 (-127400)	CPNE8 (-164419)	0.28487	no	0.0220088	no	-0.286893
chr15	93650869	93651369	mm10_chr15.93650869.93651369	1.74972	0.00153686	1.73688	2.45726	1.88096	2.23512	2.70895	2.40186	2.09632	1.81266	1.14542	1.90438	1.21803	1.96344	MM10000000004562873	0.997251	NA	0.993579	yes	yes	yes	yes	yes	no	no	yes	no	Prickle1 (-131596)	PRICKLE1 (-79635)	0.411956	no	0.252214	no	-0.160861
chr15	93651124	93651624	mm10_chr15.93651124.93651624	1.74972	0.00153686	0.904376	1.99085	0.992512	0.256603	1.04687	1.45283	2.12065	0.752869	0.806678	1.56475	0.687858	1.14335	MM10000000004562874	0.971141	NA	NA	no	yes	yes	yes	yes	no	no	yes	no	Prickle1 (-131851)	PRICKLE1 (-79896)	0.514556	no	0.0957502	no	-0.459879
chr15	93656693	93657193	mm10_chr15.93656693.93657193	1.59284	0.00904745	1.13997	0.873845	3.2844	2.44668	2.43117	0.820533	4.45532	2.37735	0.999959	0.804973	2.4392	2.00667	MM10000000004562902	0.999365	NA	0.999987	yes	yes	yes	yes	yes	yes	yes	yes	no	Prickle1 (-137420)	PRICKLE1 (-89831)	0.32036	no	0.443241	no	0.371311
chr15	95097970	95098470	mm10_chr15.95097970.95098470	2.45291	6.27e-06	1.17631	1.1839	0.70119	0.398141	0.81199	1.29338	0.788987	0.139636	1.00008	1.08503	0.329703	0.80985	MM10000000004570109	0.950866	NA	NA	yes	yes	yes	yes	yes	yes	yes	yes	no	Nell2 (+430486)	NELL2 (+485133)	0.047608	no	0.430588	no	-1.43385
chr15	97164644	97165144	mm10_chr15.97164644.97165144	2.7018	4.71e-12	1.9864	1.78235	1.80778	3.00794	2.97365	3.13015	3.34258	1.97159	1.53402	1.45118	1.62782	2.23777	MM10000000004580442	0.999261	NA	0.997187	yes	yes	yes	yes	yes	yes	yes	yes	no	Pced1b (-82213)	PCED1B (-119850)	0.125922	no	0.844938	no	0.096095
chr15	98212242	98212742	mm10_chr15.98212242.98212742	4.83834	5.76e-16	1.54517	3.61436	2.57121	2.46984	2.87177	3.24126	4.30615	2.22289	1.14358	2.6656	2.03096	2.60753	MM10000000004585680	0.997531	NA	0.99871	yes	yes	yes	yes	yes	yes	yes	no	NA	Olfr287 (+8564)	NA	0.053404	no	0.240796	yes	1.9917
chr15	98286381	98286881	mm10_chr15.98286381.98286881	3.37759	4.23e-19	1.54653	1.45439	0.758312	2.23333	2.38368	2.6951	0.81384	0.85679	1.16602	1.19038	0.557707	1.42328	MM10000000004586051	0.955655	NA	NA	yes	yes	yes	yes	yes	no	no	yes	no	Zfp641 (+9452)	ZNF641 (+9694)	0.200278	yes	0.598421	no	0.135785
chr15	100806425	100806925	mm10_chr15.100806425.100806925	3.21506	2.05e-16	1.69438	1.43941	0.604783	1.65247	1.32664	1.47888	0.573195	1.6714	1.34153	1.38115	0.603889	1.25161	MM10000000004598651	0.980093	NA	NA	yes	yes	yes	yes	yes	yes	yes	yes	no	Slc4a8 (+44928)	SLC4A8 (+64361)	-0.035318	yes	1.20415	yes	0.466195
chr15	100806667	100807167	mm10_chr15.100806667.100807167	3.21506	2.05e-16	1.58062	0.976168	1.74758	0.264093	0.418195	0.0409322	1.09245	1.0553	1.09231	0.913465	1.25454	0.948696	MM10000000004598652	0.977436	NA	0.987551	yes	yes	yes	yes	yes	yes	yes	yes	no	Slc4a8 (+45170)	SLC4A8 (+64613)	-0.021986	yes	0.708773	yes	0.379019
chr15	103384509	103385009	mm10_chr15.103384509.103385009	2.72216	6.67e-07	2.13041	2.41932	2.57215	2.09031	2.12369	2.20709	3.59744	2.53671	1.40715	2.00949	2.02287	2.28333	MM10000000004611541	0.932296	NA	NA	yes	yes	yes	yes	yes	yes	yes	yes	no	Itga5 (-17996)	ITGA5 (-14725)	0.0819056	no	0.846321	yes	2.17459
chr16	11090869	11091369	mm10_chr16.11090869.11091369	2.4148	1.33e-12	2.18174	2.19388	1.53318	2.51207	3.12154	2.14834	1.65501	0.359619	1.63675	1.78752	0.992007	1.82924	MM10000000003659040	0.98997	NA	NA	yes	yes	yes	yes	yes	no	no	yes	no	Snn (+24821)	SNN (+29113)	0.05446	yes	0.916152	yes	0.637031
chr16	11479542	11480042	mm10_chr16.11479542.11480042	2.53808	1.25e-06	1.22355	0.534646	3.50937	0.179229	0.0331429	0.117215	3.77009	0.954819	1.01607	0.532407	2.64869	1.31993	MM10000000003660983	0.548942	NA	NA	yes	yes	yes	yes	yes	no	no	yes	no	Snx29 (+156884)	SNX29 (+192012)	0.019436	yes	0.29293	yes	0.894858
chr16	11776071	11776571	mm10_chr16.11776071.11776571	3.35094	9.37e-14	1.24804	2.22417	0.737757	1.8209	1.63995	2.32369	1.10047	2.10565	0.999942	1.74543	0.196873	1.46753	MM10000000003662466	0.991465	NA	NA	yes	yes	yes	yes	yes	yes	yes	no	NA	Gm9961 (-125042)	NA	0.02006	yes	0.409892	no	0.372313
chr16	11776434	11776934	mm10_chr16.11776434.11776934	3.35094	9.37e-14	1.02887	2.95801	1.03909	1.36589	1.87974	1.88704	1.62172	0.506041	0.999992	2.25395	0.753615	1.48127	MM10000000003662468	0.972259	NA	NA	no	yes	yes	yes	yes	yes	yes	yes	no	Gm9961 (-124679)	CPPED1 (+169456)	0.060646	yes	0.461645	no	0.0487778
chr16	13055194	13055694	mm10_chr16.13055194.13055694	2.39742	6.31e-06	1.44835	2.62429	0.944846	1.12797	1.80289	1.94965	1.89908	1.00505	0.999674	2.12051	0.854657	1.52518	MM10000000003668862	0.897496	NA	NA	yes	yes	yes	yes	yes	yes	yes	yes	no	Ercc4 (-54240)	ERCC4 (-16967)	0.107122	no	0.733981	yes	0.473742
chr16	13585141	13585641	mm10_chr16.13585141.13585641	2.36151	2.68e-06	1.33138	0.983661	1.21539	0.725913	1.7149	0.973703	0.917654	0.68632	1.10302	0.872608	1.07944	1.05491	MM10000000003671511	0.696446	NA	0.992839	yes	yes	yes	yes	yes	no	no	yes	no	Parn (+82779)	PARN (+101635)	-0.113212	no	0.750549	no	-0.472628
chr16	17949302	17949802	mm10_chr16.17949302.17949802	2.50067	2.17e-09	1.03785	0.54452	0.59066	0.467586	0.832002	1.38219	1.58639	0.468802	1.00001	0.45172	0.501743	0.80577	MM10000000003693332	0.903163	NA	0.996818	yes	yes	yes	yes	yes	no	no	no	NA	Slc25a1 (-21333)	NA	0.044846	yes	0.59434	no	-0.533316
chr16	21955775	21956275	mm10_chr16.21955775.21956275	2.03568	4.69e-05	1.06414	1.63494	1.96405	1.14062	1.35955	0.938125	2.95459	1.88907	0.999999	1.30031	1.40152	1.51336	MM10000000003713365	NA	NA	NA	yes	yes	yes	yes	yes	yes	yes	yes	no	Tmem41a (-8473)	TMEM41A (-9674)	0.330108	yes	0.340867	no	0.308575
chr16	24047899	24048399	mm10_chr16.24047899.24048399	2.92846	4.92e-09	0.655424	2.44218	1.3244	0.765198	1.14562	1.63598	1.82431	0.654789	0.62006	1.86976	1.31539	1.29574	MM10000000003723825	0.970081	NA	NA	yes	yes	yes	yes	yes	yes	yes	yes	no	Bcl6 (-59297)	BCL6 (-53275)	-0.026922	no	0.0999437	no	0.622621
chr16	24096044	24096544	mm10_chr16.24096044.24096544	2.19172	0.000247978	0.00151548	1.19809	1.92473	0.615546	0.830114	1.02037	1.75508	1.78883	0.295272	0.99323	1.46355	1.08058	MM10000000003724066	0.78231	NA	0.998391	yes	yes	yes	no	no	no	no	yes	no	Bcl6 (-107442)	BCL6 (-111075)	0.195248	no	0.169391	no	-1.26098
chr16	24424567	24425067	mm10_chr16.24424567.24425067	1.90305	0.00693928	2.11285	2.21496	2.76997	1.82124	1.58997	1.69482	2.9147	2.78734	1.66248	1.72733	2.10576	2.1274	MM10000000003725709	0.984075	NA	NA	yes	yes	yes	yes	yes	yes	yes	yes	no	Lpp (+31467)	LPP (-26786)	0.472278	no	0.568585	yes	1.86842
chr16	24693621	24694121	mm10_chr16.24693621.24694121	2.34635	7.52e-06	0.989716	2.42736	1.63301	1.37505	1.01174	1.82571	2.12166	1.06086	0.790444	1.81402	1.31508	1.4877	MM10000000003727054	0.673092	NA	NA	yes	yes	yes	yes	yes	no	no	yes	no	Lpp (+300521)	LPP (+327035)	0.22539	no	-0.281759	yes	0.947693
chr16	24830742	24831242	mm10_chr16.24830742.24831242	2.08472	0.00105664	1.34615	1.11724	0.804822	0.182142	0.27808	0.920226	0.862334	1.42429	1.09166	0.93529	0.491697	0.859448	MM10000000003727739	NA	NA	NA	yes	yes	yes	yes	yes	yes	yes	yes	no	Lpp (+437642)	LPP (+479137)	0.119044	no	0.926721	yes	0.354115
chr16	24830887	24831387	mm10_chr16.24830887.24831387	2.08472	0.00105664	1.99659	2.0933	0.464149	1.27803	1.33018	2.14603	1.8853	0.866991	1.61814	1.79872	0.182913	1.42367	MM10000000003727740	0.988147	NA	NA	yes	yes	yes	yes	yes	yes	yes	yes	no	Lpp (+437787)	LPP (+479294)	0.036446	no	1.33175	yes	0.670053
chr16	24833534	24834034	mm10_chr16.24833534.24834034	1.82618	0.00790636	2.13425	0.860358	1.4455	0.118335	0.582906	0.539563	1.61102	0.00243156	1.61827	0.854432	1.0067	0.979433	MM10000000003727753	0.7776	NA	NA	no	yes	yes	yes	yes	no	no	yes	no	Lpp (+440434)	TPRG1 (-477950)	0.076004	no	0.64024	no	0.27645
chr16	25224765	25225265	mm10_chr16.25224765.25225265	1.98732	0.00647881	0.716215	2.12734	1.9925	1.13127	1.47554	1.2191	2.03251	2.38087	0.608637	1.35159	1.29787	1.48486	MM10000000003729710	0.796656	NA	NA	yes	yes	yes	yes	yes	yes	yes	no	NA	Tprg (-61802)	NA	0.121782	no	0.103602	no	-0.137154
chr16	27317939	27318439	mm10_chr16.27317939.27318439	2.92881	6.26e-14	1.43774	1.89247	0.616581	2.49284	2.41387	2.10971	0.755943	0.00680267	0.999944	1.42828	0.289947	1.3131	MM10000000003740175	0.996619	NA	NA	yes	yes	yes	yes	yes	yes	yes	yes	no	Ostn (+10700)	OSTN (-4128)	0.672334	yes	0.165826	no	2.10292
chr16	35104542	35105042	mm10_chr16.35104542.35105042	2.98694	1.13e-12	1.03317	2.03519	0.68722	1.16172	0.785624	1.75586	0.699053	1.5645	0.991793	1.58226	0.400438	1.15426	MM10000000003779108	0.995348	NA	NA	yes	yes	yes	yes	yes	yes	yes	yes	no	Adcy5 (-50085)	ADCY5 (-46929)	0.075614	yes	0.548913	no	1.00744
chr16	35104910	35105410	mm10_chr16.35104910.35105410	2.98694	1.13e-12	1.56317	2.41544	1.80854	0.247326	0.642129	0.583958	2.22442	1.33014	1.28185	1.88026	1.56796	1.4132	MM10000000003779110	0.993834	NA	NA	no	yes	yes	yes	yes	yes	yes	yes	no	Adcy5 (-49717)	ADCY5 (-46535)	-0.074046	yes	0.620642	no	0.841922
chr16	35508503	35509003	mm10_chr16.35508503.35509003	2.64452	1.81e-05	1.235	1.20745	1.79892	0.622565	0.651792	0.40161	2.09588	0.492347	0.897081	1.05049	1.31616	1.06994	MM10000000003781128	NA	NA	0.998958	yes	yes	yes	yes	yes	yes	yes	yes	no	Pdia5 (-17880)	PDIA5 (-9921)	0.01419	no	0.278766	no	0.286871
chr16	35683174	35683674	mm10_chr16.35683174.35683674	2.73865	2.64e-06	0.999684	0.932375	0.801672	0.126454	0.57079	0.567873	0.975023	1.03887	0.913074	1.03361	0.710172	0.788145	MM10000000003782002	0.968503	NA	0.999395	yes	yes	yes	yes	yes	yes	yes	yes	no	Dirc2 (+85932)	SEMA5B (+82793)	0.14544	no	0.416816	no	-0.350597
chr16	35782467	35782967	mm10_chr16.35782467.35782967	1.92154	0.000169861	2.00987	1.16936	1.74332	1.58475	1.85378	1.76878	1.80905	0.492402	1.4692	1.12048	1.25991	1.48008	MM10000000003782498	0.967555	NA	0.994122	yes	yes	yes	yes	yes	no	no	no	NA	Hspbap1 (+12331)	NA	0.0704134	no	0.82623	yes	0.41302
chr16	44875027	44875527	mm10_chr16.44875027.44875527	1.85213	0.000267778	0.999932	1.5731	0.542492	0.788123	0.641762	0.833989	0.801118	0.891284	0.979005	1.33249	0.387959	0.888296	MM10000000003827961	0.907002	0.999366	NA	yes	yes	yes	yes	yes	yes	yes	no	NA	Cd200r2 (+8180)	NA	0.012154	yes	0.386681	yes	0.706244
chr16	45876851	45877351	mm10_chr16.45876851.45877351	1.75623	1.5e-05	2.00707	1.99795	1.50837	1.5882	1.92525	1.192	1.86296	0.726438	1.48719	1.66824	1.27432	1.56709	MM10000000003832970	0.992464	NA	NA	yes	yes	yes	yes	yes	no	no	no	NA	Phldb2 (-32867)	NA	0.063398	yes	0.938235	yes	1.2644
chr16	49358312	49358812	mm10_chr16.49358312.49358812	1.65409	0.000471685	1.65269	1.01891	1.02868	0.559396	0.454245	0.465014	1.02555	0.612042	1.12202	0.792485	0.759978	0.862819	MM10000000003850377	0.985858	NA	0.999719	yes	yes	yes	yes	yes	yes	yes	yes	no	Gm5407 (-61168)	MYH15 (+54537)	0.148846	yes	0.25753	yes	1.37305
chr16	49899092	49899592	mm10_chr16.49899092.49899592	2.11267	6.23e-07	1.77993	2.04278	1.42319	2.08129	1.99181	2.2719	2.71166	0.386543	1.31555	1.54229	0.984553	1.68468	MM10000000003853081	0.982676	NA	NA	yes	yes	yes	yes	yes	no	no	yes	no	Cd47 (+43724)	CD47 (+34874)	0.11821	yes	0.706642	yes	0.87292
chr16	50155845	50156345	mm10_chr16.50155845.50156345	2.58558	2.02e-10	1.49954	2.66216	1.43824	3.17507	3.10086	2.78942	2.4117	2.3334	1.10818	2.29209	1.02474	2.16685	MM10000000003854365	0.996178	NA	0.989612	yes	yes	yes	yes	yes	no	no	yes	no	Bbx (+276295)	CD47 (+250111)	0.26576	yes	0.794457	yes	1.21278
chr16	50174331	50174831	mm10_chr16.50174331.50174831	2.78742	8.31e-14	3.06953	3.99015	1.28175	3.97652	3.97508	3.90537	2.11671	0.349784	2.29823	3.16649	1.01362	2.64938	MM10000000003854457	0.998657	NA	0.989172	yes	yes	yes	yes	yes	yes	yes	yes	no	Bbx (+257809)	CD47 (+264099)	0.390848	yes	1.11288	yes	2.24573
chr16	50175253	50175753	mm10_chr16.50175253.50175753	2.677	5.04e-11	1.93734	3.86565	1.29033	1.85763	2.35757	2.41713	3.20723	2.68784	1.43414	2.84953	1.05906	2.2694	MM10000000003854462	0.947764	NA	0.993552	yes	yes	yes	yes	yes	yes	yes	yes	no	Bbx (+256887)	CD47 (+265163)	-0.010614	yes	0.602067	yes	0.716571
chr16	51933046	51933546	mm10_chr16.51933046.51933546	2.08964	2.45e-07	1.00238	1.3912	0.974872	1.30885	1.68392	1.27791	1.74882	0.354181	0.953407	1.09542	0.937843	1.15716	MM10000000003863251	0.778462	NA	0.995465	yes	yes	yes	yes	yes	yes	yes	yes	no	Cblb (-98253)	CBLB (-72229)	-0.128614	yes	0.103296	yes	0.0132834
chr16	55905322	55905822	mm10_chr16.55905322.55905822	1.90186	0.00272443	2.12599	2.68378	0.99221	1.91647	1.96948	1.77958	1.88906	0.471555	1.46862	2.23498	0.899536	1.67557	MM10000000003883112	0.962164	NA	NA	yes	yes	yes	yes	yes	yes	yes	yes	no	Nxpe3 (-10293)	NXPE3 (-14299)	0.595288	no	0.631222	no	-0.448699
chr16	55914937	55915437	mm10_chr16.55914937.55915437	2.21336	1.08e-07	1.07756	1.75915	2.40714	2.09807	2.36092	2.221	3.6544	1.21542	1.05172	1.43906	1.94742	1.93017	MM10000000003883160	0.983284	NA	NA	yes	yes	yes	yes	yes	yes	yes	yes	no	Cep97 (+19668)	NXPE3 (-21357)	0.558238	no	0.571226	no	0.470294
chr16	55915255	55915755	mm10_chr16.55915255.55915755	2.21336	1.08e-07	1.11154	2.26327	2.05696	1.17203	1.81365	1.29589	2.41994	0.977357	1.00024	1.74064	1.49162	1.57665	MM10000000003883162	0.997535	NA	0.99582	yes	yes	yes	yes	yes	yes	yes	yes	no	Cep97 (+19350)	NXPE3 (-21655)	0.634934	no	0.178827	no	1.34229
chr16	60076187	60076687	mm10_chr16.60076187.60076687	2.5118	7.48e-14	1.26079	1.97812	1.83715	1.03623	1.20553	1.2355	1.79647	0.598186	0.997087	1.55802	1.43151	1.35769	MM10000000003903967	0.993033	NA	NA	yes	yes	yes	yes	yes	yes	yes	no	NA	Arl6 (-437046)	NA	0.109058	yes	0.151988	no	0.820538
chr16	60076969	60077469	mm10_chr16.60076969.60077469	2.5118	7.48e-14	1.39833	0.18099	0.966893	0.720301	0.622508	0.145505	2.11373	1.0477	1.06669	0.28925	0.923574	0.861406	MM10000000003903971	0.814674	NA	NA	no	no	no	no	no	no	no	no	NA	Arl6 (-437828)	NA	0.0266566	no	0.372676	no	0.0620053
chr16	62542018	62542518	mm10_chr16.62542018.62542518	1.60022	0.00148923	1.37302	1.25756	2.67266	2.09721	2.40814	1.6389	2.89467	1.12309	0.999813	1.22629	2.03225	1.79305	MM10000000003916296	0.936983	NA	0.998488	yes	yes	yes	yes	yes	yes	yes	yes	no	Nsun3 (+244509)	DHFR2 (-200449)	0.399302	yes	0.254221	no	2.22391
chr16	71062719	71063219	mm10_chr16.71062719.71063219	2.66863	9.94e-22	1.32337	2.24593	1.15515	1.0526	1.08973	1.51242	1.6598	1.52054	0.999981	1.84782	1.02483	1.40292	MM10000000003958899	0.981067	NA	0.991536	yes	yes	yes	yes	yes	yes	yes	yes	no	Gbe1 (+749020)	GBE1 (+758095)	0.37174	yes	0.215253	yes	0.238665
chr16	81761528	81762028	mm10_chr16.81761528.81762028	2.04836	4.53e-05	2.28309	2.8759	1.45158	3.72016	3.78198	3.39483	1.89216	2.17936	1.59415	2.21988	0.977123	2.39729	MM10000000004012393	0.912959	NA	NA	yes	yes	yes	yes	yes	no	no	yes	no	Ncam2 (+561081)	NCAM2 (+672034)	-0.04508	yes	0.851425	no	1.11742
chr16	85061145	85061645	mm10_chr16.85061145.85061645	1.86385	2.66e-06	0.937953	2.28344	0.899642	0.514578	0.640079	1.56066	1.3101	2.38473	0.708739	1.66439	0.724944	1.23902	MM10000000004028891	0.791278	NA	NA	no	no	no	no	no	no	no	no	NA	App (+112312)	NA	-0.020988	no	0.370359	no	0.335634
chr16	85061555	85062055	mm10_chr16.85061555.85062055	1.86385	2.66e-06	1.6693	1.5768	0.665099	1.2927	1.42149	2.12612	1.9746	0.0964186	1.35833	1.45158	0.488265	1.2837	MM10000000004028894	0.911647	NA	NA	yes	yes	yes	yes	yes	no	no	yes	no	App (+111902)	APP (+142296)	0.035064	yes	0.663287	no	0.375584
chr16	87237770	87238270	mm10_chr16.87237770.87238270	1.7575	0.00861391	1.13624	1.671	2.09191	1.03955	1.32274	1.48457	2.15337	0.498654	0.999979	1.32443	1.36054	1.37118	MM10000000004039775	0.994122	NA	0.995933	yes	yes	yes	yes	yes	no	no	yes	no	N6amt1 (-116165)	N6AMT1 (+151047)	0.03594	no	0.223111	yes	0.906059
chr16	87665228	87665728	mm10_chr16.87665228.87665728	1.96597	1.44e-07	1.21921	0.917565	0.988127	1.85176	1.78074	2.01062	2.13271	1.14375	1.12417	0.816135	0.90489	1.35361	MM10000000004041912	0.990904	0.999932	0.982914	yes	yes	yes	yes	yes	no	no	no	NA	Bach1 (-33467)	NA	0.0443731	yes	0.449778	yes	0.779122
chr16	87673208	87673708	mm10_chr16.87673208.87673708	2.11333	0.00202413	1.31493	1.68663	0.826312	1.71313	2.02123	1.36675	0.673716	0.807011	0.999977	1.32289	0.298506	1.18464	MM10000000004041952	0.995144	NA	0.992208	yes	yes	yes	yes	yes	no	no	yes	no	Bach1 (-25487)	BACH1 (-34571)	0.036302	no	0.560376	no	0.795201
chr16	87673480	87673980	mm10_chr16.87673480.87673980	2.11333	0.00202413	0.986352	3.17606	0.996399	1.78856	2.2994	2.49461	1.2526	1.13695	0.841567	2.22201	0.648285	1.62207	MM10000000004041953	NA	NA	NA	no	yes	yes	yes	yes	no	no	yes	no	Bach1 (-25215)	BACH1 (-34351)	0.052598	no	0.30328	no	-0.928077
chr16	87858215	87858715	mm10_chr16.87858215.87858715	2.79776	1.86e-12	1.84147	0.738385	1.6152	1.28213	1.25161	0.825151	2.57818	0.0590085	1.10782	0.468042	1.12194	1.17172	MM10000000004042877	0.802752	NA	0.99971	yes	yes	yes	yes	yes	yes	yes	yes	no	Bach1 (+159520)	BACH1 (+196509)	-0.078824	no	0.349341	no	-0.0623392
chr16	87904763	87905263	mm10_chr16.87904763.87905263	3.04624	2.02e-10	0.985435	2.93184	2.71328	2.09983	2.1747	2.14014	4.03806	4.46195	0.906936	2.2488	2.07364	2.43406	MM10000000004043110	0.910155	NA	0.998998	yes	yes	yes	yes	yes	yes	yes	yes	no	Bach1 (+206068)	BACH1 (+245711)	-0.108808	no	-0.414223	no	0.491173
chr16	88586694	88587194	mm10_chr16.88586694.88587194	2.40617	0.000184036	1.50921	2.29326	1.21372	1.97388	1.71168	2.91731	1.42644	0.184127	1.18524	2.10316	0.948781	1.58789	MM10000000004046519	0.984172	NA	NA	yes	yes	yes	yes	yes	yes	yes	yes	no	Cldn8 (-23761)	CLDN8 (-28720)	0.087724	yes	0.398108	no	1.35185
chr4	84152007	84152507	mm10_chr4.84152007.84152507	2.76129	1.87e-09	1.82866	3.12126	1.12038	3.19462	3.0472	3.29213	1.54702	0.520299	1.36058	2.61023	0.815954	2.04167	MM10000000008673511	0.995877	NA	NA	yes	yes	yes	yes	yes	yes	yes	yes	yes	Bnc2 (+522829)	BNC2 (+592101)	0.972636	yes	0.852242	no	1.09921
chr16	90580334	90580834	mm10_chr16.90580334.90580834	1.8366	0.000147255	1.62507	1.16127	1.05024	1.18943	1.32176	1.91513	2.01077	1.28536	1.51301	1.159	0.617336	1.34985	MM10000000004056487	0.995639	NA	0.993235	yes	yes	yes	yes	yes	yes	yes	yes	no	Mis18a (+146820)	MIS18A (+185201)	0.319032	yes	1.54942	no	0.521724
chr16	92558022	92558522	mm10_chr16.92558022.92558522	2.17998	0.000652008	0.72777	1.49476	1.86618	0.808657	1.10824	1.02721	2.25762	0.456227	0.587934	1.21156	1.63857	1.19861	MM10000000004066376	0.929073	NA	0.99795	yes	yes	yes	yes	yes	no	no	yes	no	Clic6 (+60138)	CLIC6 (+67945)	0.0255651	no	-0.219886	no	-0.345401
chr16	92773552	92774052	mm10_chr16.92773552.92774052	2.57625	1.02e-05	0.688437	1.27646	1.0571	0.69519	1.03024	1.50306	1.72669	2.1737	0.67933	0.959293	0.910939	1.15459	MM10000000004067454	0.832901	NA	NA	yes	yes	yes	yes	yes	yes	yes	yes	no	Runx1 (+52347)	RUNX1 (+68327)	0.708154	no	0.200863	no	0.708415
chr16	95763211	95763711	mm10_chr16.95763211.95763711	2.95163	3.65e-06	1.87283	3.01928	1.13588	1.86174	1.8973	2.93731	1.7345	2.38161	1.60111	2.54128	0.860702	1.98578	MM10000000004082402	0.990357	NA	0.994055	yes	yes	yes	yes	yes	no	no	yes	no	Ets2 (+61386)	ETS2 (+102050)	0.0448286	yes	1.14338	no	0.161645
chr16	95823715	95824215	mm10_chr16.95823715.95824215	1.69453	0.000429233	1.76684	1.84837	0.667449	1.0857	1.49497	1.91746	2.14934	1.14728	1.52899	1.59605	0.637658	1.44001	MM10000000004082704	0.974199	NA	0.986203	yes	yes	yes	no	yes	yes	no	yes	no	Ets2 (+121890)	ETS2 (+159250)	-0.12021	yes	0.880025	no	0.0520025
chr16	96406274	96406774	mm10_chr16.96406274.96406774	2.66228	0.000346815	0.91275	1.4117	1.82496	0.791377	0.831215	1.10324	1.97968	1.88421	0.746986	1.07516	1.311	1.26112	MM10000000004085617	0.995933	NA	NA	yes	yes	yes	yes	yes	no	no	yes	no	Itgb2l (+37095)	IGSF5 (+59050)	0.174621	no	-0.0436062	yes	0.620186
chr17	7142297	7142797	mm10_chr17.7142297.7142797	2.60238	4.8e-06	2.02278	3.79271	3.21597	1.77892	2.26716	2.37455	4.88596	3.10533	1.46579	2.83678	2.45923	2.74593	MM10000000003164366	0.999344	NA	0.995099	yes	yes	yes	yes	yes	yes	yes	no	NA	Rps6ka2 (-27568)	NA	0.072856	no	0.279175	yes	1.20999
chr17	8308253	8308753	mm10_chr17.8308253.8308753	2.08868	0.00232099	1.41149	1.57394	1.10935	0.869469	1.47292	1.38679	0.546982	0.0790229	1	1.40135	0.692049	1.0494	MM10000000003170196	0.968024	NA	NA	yes	yes	yes	yes	yes	no	no	no	NA	Sft2d1 (-2599)	NA	0.020126	yes	0.533762	no	0.257924
chr17	8482895	8483395	mm10_chr17.8482895.8483395	1.97517	0.000510623	0.160613	1.77394	2.51866	1.43986	1.68129	0.782271	3.15997	3.27717	0.344787	1.42347	2.10435	1.69694	MM10000000003171069	NA	NA	0.998168	yes	yes	yes	no	yes	yes	no	yes	no	T (+48722)	T (+88635)	-0.008162	no	0.336243	no	-0.0687897
chr17	29290183	29290683	mm10_chr17.29290183.29290683	3.99924	4.1e-09	1.57554	2.59356	0.370615	1.57771	2.06039	2.32616	0.793295	2.59124	0.999951	2.09486	0.380031	1.57849	MM10000000003275106	0.82983	NA	NA	yes	yes	yes	yes	yes	yes	yes	no	NA	BC004004 (+21645)	NA	-0.011354	no	0.175538	no	0.266377
chr17	29290462	29290962	mm10_chr17.29290462.29290962	3.99924	4.1e-09	1.67316	2.16015	0.751909	1.16549	1.34022	1.01645	1.67439	1.81233	1.15986	1.76289	0.515054	1.36654	MM10000000003275107	0.967332	NA	NA	yes	yes	yes	yes	yes	yes	yes	no	NA	BC004004 (+21924)	NA	-0.0330675	no	0.797759	no	0.675238
chr17	30314516	30315016	mm10_chr17.30314516.30315016	3.64049	7.14e-12	1.50972	1.23403	1.62267	0.810646	1.21313	1.32103	1.11359	0.378601	1.21178	0.989068	1.16657	1.1428	MM10000000003280227	0.989654	NA	0.994098	yes	yes	yes	yes	yes	yes	yes	no	NA	Btbd9 (+261521)	NA	0.052838	no	0.736269	no	-0.591429
chr17	30314850	30315350	mm10_chr17.30314850.30315350	3.64049	7.14e-12	0.789246	1.80185	0.778336	0.533487	0.590917	1.34955	0.992792	1.98951	0.722207	1.53121	0.803716	1.08026	MM10000000003280229	NA	NA	NA	no	yes	yes	yes	yes	yes	yes	no	NA	Btbd9 (+261187)	NA	0.01063	no	-0.063856	no	0.118634
chr17	30907585	30908085	mm10_chr17.30907585.30908085	3.03022	5.34e-09	1.9925	2.00139	0.858682	1.27543	1.86709	1.92796	3.13873	1.58359	1.60919	1.59184	0.61264	1.67809	MM10000000003283193	0.986721	NA	NA	yes	yes	yes	yes	yes	yes	yes	yes	no	Glp1r (+5968)	GLP1R (+7303)	-0.065392	no	0.854618	no	0.117115
chr17	45498408	45498908	mm10_chr17.45498408.45498908	4.64148	3.64e-13	1.42254	2.44793	2.32862	2.37655	2.35192	1.52459	2.48653	2.89337	1.08723	1.92741	1.71349	2.05093	MM10000000003356147	0.992744	NA	NA	yes	yes	yes	yes	yes	yes	yes	no	NA	Aars2 (-8183)	NA	0.01923	yes	0.985257	yes	1.24876
chr17	45498687	45499187	mm10_chr17.45498687.45499187	4.64148	3.64e-13	0.999966	2.54248	0.0577406	0.368128	0.768497	1.35828	0.682137	0.906685	0.889364	1.93271	0.161146	0.969739	MM10000000003356148	NA	NA	NA	no	yes	yes	yes	yes	yes	yes	no	NA	Aars2 (-7904)	NA	0.069632	yes	0.503157	yes	0.343902
chr17	50134914	50135414	mm10_chr17.50134914.50135414	2.40181	4.52e-08	2.25305	1.84599	1.05831	0.280983	0.467626	0.738574	2.22034	2.17578	1.57176	1.53889	0.88652	1.36707	MM10000000003379329	NA	NA	NA	no	no	no	no	no	no	no	yes	no	Rftn1 (+55510)	RFTN1 (+45871)	-0.098926	no	0.737987	no	-0.339318
chr17	50135474	50135974	mm10_chr17.50135474.50135974	2.40181	4.52e-08	1.34347	2.2148	1.87141	1.47528	1.53089	1.169	2.80237	0.790535	1.00028	1.51123	1.37833	1.55342	MM10000000003379332	0.999219	NA	NA	yes	yes	yes	yes	yes	yes	yes	yes	no	Rftn1 (+54950)	RFTN1 (+45218)	0.110438	no	0.424761	no	1.2848
chr17	51477451	51477951	mm10_chr17.51477451.51477951	1.84638	0.0037141	2.13871	1.10972	1.98367	1.79718	1.8447	1.78142	3.18114	1.4613	1.5819	1.07756	1.6937	1.78645	MM10000000003386042	0.988867	NA	0.999202	yes	yes	yes	yes	no	no	no	yes	yes	Tbc1d5 (-298533)	SATB1 (+361734)	0.39441	yes	0.639662	no	1.08776
chr17	56146074	56146574	mm10_chr17.56146074.56146574	2.7811	1.79e-08	2.92784	2.8954	0.81963	1.76528	1.8338	2.0327	0.732965	2.40416	2.18588	2.54864	0.730981	1.89793	MM10000000003409385	0.998709	NA	0.989957	yes	yes	yes	yes	yes	yes	yes	yes	no	Sema6b (-12472)	SEMA6B (-33300)	0.161094	yes	1.35533	yes	0.0830384
chr17	67180250	67180750	mm10_chr17.67180250.67180750	2.3961	0.000660328	1.13511	1.43	0.764386	0.496594	1.04592	0.764921	1.21708	1.68182	0.996497	1.2399	0.686178	1.04167	MM10000000003464556	0.773854	NA	NA	yes	yes	yes	yes	yes	yes	yes	yes	no	Ptprm (+173887)	PTPRM (+218974)	0.168448	no	0.523322	no	1.17604
chr17	67211234	67211734	mm10_chr17.67211234.67211734	2.75704	3.57e-07	1.38072	1.4848	0.848451	0.741962	0.476765	0.700787	0.955358	2.0409	1.06847	1.12207	0.767532	1.05344	MM10000000003464711	0.996818	NA	NA	yes	yes	yes	yes	yes	no	no	no	NA	Ptprm (+142903)	NA	0.137796	no	0.805741	no	-0.295935
chr17	67211848	67212348	mm10_chr17.67211848.67212348	2.75704	3.57e-07	0.595201	0.885133	0.331446	0.927266	1.05748	0.841245	0.580699	0.187445	0.641903	0.887966	0.432023	0.669801	MM10000000003464714	0.876945	NA	NA	no	yes	yes	yes	yes	no	no	yes	no	Ptprm (+142289)	PTPRM (+176882)	0.202822	no	0.382396	no	-0.253613
chr17	69732719	69733219	mm10_chr17.69732719.69733219	3.32929	1.51e-18	0.909188	1.72022	2.07541	1.33236	1.32198	1.25174	2.23799	1.2357	0.848285	1.42546	1.42891	1.4352	MM10000000003477318	0.974816	NA	NA	yes	yes	yes	yes	yes	no	no	yes	no	Akain1 (+293643)	DLGAP1 (-353084)	0.338954	yes	0.49389	no	1.01694
chr17	69827441	69827941	mm10_chr17.69827441.69827941	3.0761	2.58e-10	0.999798	1.10615	0.52498	0.455673	0.903856	0.999654	0.40508	0.00957364	0.953503	1.02222	0.433139	0.71033	MM10000000003477792	0.899548	NA	NA	yes	yes	yes	yes	yes	no	no	no	NA	Akain1 (+388365)	NA	0.028088	no	0.35119	no	-0.183123
chr17	69827734	69828234	mm10_chr17.69827734.69828234	3.0761	2.58e-10	1.48882	2.36785	2.7246	1.44229	1.31624	1.42152	4.03238	2.65084	0.99991	1.74022	2.08136	2.02418	MM10000000003477793	0.868351	NA	NA	yes	yes	yes	yes	yes	no	no	no	NA	Akain1 (+388658)	NA	0.05073	no	0.265556	no	0.406676
chr17	73522676	73523176	mm10_chr17.73522676.73523176	2.31665	0.000238515	2.22763	3.72499	3.17733	1.67058	2.33458	2.61129	3.80636	4.43053	1.77325	2.98914	2.32747	2.82483	MM10000000003496268	0.998215	NA	NA	yes	yes	yes	yes	yes	yes	yes	yes	no	Capn13 (-123630)	CAPN13 (-135120)	0.064064	no	0.688802	no	1.28643
chr17	77033381	77033881	mm10_chr17.77033381.77033881	2.61906	1.79e-12	0.555449	1.81918	2.24662	1.23488	1.42307	1.34444	2.59906	2.11381	0.347245	1.34526	1.71998	1.52264	MM10000000003513822	0.993011	NA	NA	yes	yes	yes	yes	yes	yes	yes	yes	no	NONE	NONE	-0.094864	no	-0.42124	no	0.946498
chr17	79334519	79335019	mm10_chr17.79334519.79335019	2.66152	1.38e-11	1.60698	2.82037	1.88466	1.24753	1.70012	1.42632	2.56026	2.89466	1.19201	2.30204	1.49951	1.92131	MM10000000003525327	0.98635	NA	0.987626	yes	yes	yes	yes	yes	yes	yes	yes	no	Cdc42ep3 (+20322)	CDC42EP3 (+26303)	0.658784	yes	0.830134	no	0.180997
chr17	80736924	80737424	mm10_chr17.80736924.80737424	2.98004	6.41e-11	1.2202	1.43812	1.12748	1.53229	1.80749	1.54997	1.62323	2.42223	1.00024	0.964558	0.82131	1.40974	MM10000000003532339	0.855024	NA	NA	yes	yes	yes	yes	yes	yes	yes	yes	no	Map4k3 (-9081)	MAP4K3 (-7310)	0.160326	no	-0.167194	no	-0.247119
chr17	83221151	83221651	mm10_chr17.83221151.83221651	2.79415	1.25e-09	1.77974	2.50133	1.00047	1.23014	2.19738	2.01443	1.22115	2.71237	1.51224	2.12638	0.660551	1.72329	MM10000000003544761	0.99945	NA	NA	yes	yes	yes	yes	yes	yes	yes	yes	no	Pkdcc (+6109)	PKDCC (+6482)	0.326736	yes	1.19863	no	-0.444947
chr17	84351234	84351734	mm10_chr17.84351234.84351734	3.07413	5.15e-16	1.80506	3.86321	0.438503	2.48814	2.78122	2.50383	1.46891	1.64674	1.28658	2.83749	0.349176	1.95171	MM10000000003550411	0.997679	NA	NA	yes	yes	yes	yes	yes	yes	yes	yes	no	Thada (+114712)	THADA (+150721)	0.12462	yes	0.482703	yes	1.62529
chr17	84903557	84904057	mm10_chr17.84903557.84904057	2.22652	1.37e-07	2.49444	3.98232	2.85677	3.72037	3.9024	3.98125	3.84451	3.29269	1.71665	3.01843	2.02295	3.16662	MM10000000003553173	0.972691	NA	0.998364	yes	yes	yes	yes	yes	yes	yes	yes	no	Ppm1b (-54194)	PPM1B (-65370)	0.28538	no	0.519812	yes	0.615582
chr17	86978822	86979322	mm10_chr17.86978822.86979322	2.19062	1.73e-08	1.98321	2.83178	0.166849	0.649864	0.862506	1.05252	1.8637	0.274324	1.53479	2.35529	0.166037	1.24917	MM10000000003563549	0.911166	NA	NA	yes	yes	yes	no	yes	no	no	yes	no	Rhoq (+15990)	RHOQ (+17468)	0.009594	no	0.768626	yes	0.481455
chr17	86979125	86979625	mm10_chr17.86979125.86979625	2.19062	1.73e-08	1.32043	1.50269	1.27221	1.0554	1.36003	0.81788	1.14744	1.54065	1.13588	1.24592	0.999599	1.21801	MM10000000003563550	0.981974	NA	0.99276	yes	yes	yes	no	yes	no	no	yes	no	Rhoq (+16293)	RHOQ (+17766)	0.154552	no	0.704757	yes	1.2033
chr17	86979401	86979901	mm10_chr17.86979401.86979901	2.19062	1.73e-08	2.07609	2.04319	1.26551	1.54691	2.20342	1.87799	2.47792	1.74441	1.31026	1.78476	0.867812	1.7453	MM10000000003563552	NA	NA	NA	no	yes	yes	no	yes	no	no	yes	no	Rhoq (+16569)	RHOQ (+18015)	0.158684	no	0.366192	yes	0.710799
chr17	87778646	87779146	mm10_chr17.87778646.87779146	2.29294	0.00443437	1.25759	2.40124	0.590172	1.31793	1.33164	1.57313	1.52026	1.45899	1.00007	1.85459	0.287918	1.32668	MM10000000003567548	0.992126	NA	NA	yes	yes	yes	yes	yes	yes	yes	yes	no	Kcnk12 (+19098)	KCNK12 (+18922)	0.15895	no	0.630289	yes	0.686157
chr17	87778858	87779358	mm10_chr17.87778858.87779358	2.29294	0.00443437	0.85139	2.08321	1.72617	0.0346885	0.221591	0.372264	3.3912	3.05077	0.852415	1.57139	1.58298	1.43073	MM10000000003567549	0.959061	NA	NA	yes	yes	yes	yes	yes	yes	yes	yes	no	Kcnk12 (+18886)	KCNK12 (+18771)	0.134937	no	-0.0815431	yes	1.2529
chr17	87846980	87847480	mm10_chr17.87846980.87847480	2.65267	4.81e-10	2.03053	3.5606	0.427595	1.93067	2.32753	2.48625	1.696	1.21205	1.66009	2.82571	0.513326	1.87912	MM10000000003567890	NA	NA	NA	no	no	no	no	no	no	no	no	NA	Kcnk12 (-49236)	NA	0.023962	yes	1.0791	no	1.3671
chr17	87847409	87847909	mm10_chr17.87847409.87847909	2.65267	4.81e-10	1.38353	1.03002	1.44112	0.691644	0.783708	1.18366	1.80763	0.382012	1.20731	1.12182	1.05359	1.09873	MM10000000003567892	0.374913	NA	0.996113	yes	yes	yes	yes	yes	no	no	yes	no	Kcnk12 (-49665)	KCNK12 (-50364)	0.13687	yes	0.282181	no	-0.699129
chr17	88103340	88103840	mm10_chr17.88103340.88103840	1.98689	0.00523287	0.364077	0.136169	1.22187	0.376656	0.332899	0.286252	1.40802	1.80286	0.434218	0.259581	1.04921	0.697437	MM10000000003569171	0.942246	NA	NA	yes	yes	yes	no	yes	yes	no	yes	no	Fbxo11 (-38299)	FBXO11 (-38132)	0.080684	no	0.253657	no	0.262691
chr17	88329703	88330203	mm10_chr17.88329703.88330203	2.50806	1.66e-09	1.58607	2.42228	1.25485	2.22368	2.68398	2.53857	1.78673	2.50067	1.19009	1.94963	0.918303	1.91408	MM10000000003570303	0.989172	NA	0.988174	yes	yes	yes	yes	yes	yes	yes	yes	no	Foxn2 (-110758)	FOXN2 (-104926)	0.268662	yes	0.623605	yes	-0.861476
chr17	89911876	89912376	mm10_chr17.89911876.89912376	2.77105	2.7e-05	1.3038	1.73512	1.35624	2.09801	2.28056	2.15072	1.91492	0.69268	1.00028	1.46535	1.0494	1.54973	MM10000000003578214	0.968839	NA	NA	yes	yes	yes	yes	yes	yes	yes	yes	no	Gm10184 (-1677)	FSHR (-647567)	0.456914	no	-0.0610538	no	1.65462
chr18	5360572	5361072	mm10_chr18.5360572.5361072	2.03361	0.0057496	0.791635	1.03976	2.51177	0.720236	0.851644	0.958233	2.89863	0.690972	0.503138	1.00535	1.97338	1.2677	MM10000000005573293	0.843657	NA	NA	yes	yes	yes	yes	yes	no	no	yes	no	Zfp438 (-26383)	ZNF438 (-32981)	0.27483	no	-0.108405	no	0.617821
chr18	5360765	5361265	mm10_chr18.5360765.5361265	2.03361	0.0057496	0.429793	2.08059	0.621524	0.838889	0.957382	1.32792	1.22365	1.60486	0.189128	1.49355	0.583269	1.03187	MM10000000005573294	NA	NA	NA	yes	yes	yes	yes	yes	no	no	yes	no	Zfp438 (-26576)	ZNF438 (-33132)	0.170862	no	-0.220984	no	0.533383
chr18	8478500	8479000	mm10_chr18.8478500.8479000	2.01614	2.72e-06	1.98304	1.98059	1.91016	2.49831	2.5629	2.10724	3.09185	0.529017	1.55921	1.7111	1.36874	1.93656	MM10000000005588882	0.999711	NA	NA	yes	yes	yes	yes	yes	yes	yes	no	NA	Wac (+609553)	NA	0.0656998	yes	0.994736	no	1.44459
chr18	9108346	9108846	mm10_chr18.9108346.9108846	2.3657	3.53e-14	1.3253	0.866739	2.93851	0.675798	0.498691	0.716952	2.50535	2.38972	1.00003	0.771631	2.02231	1.42828	MM10000000005592031	0.814349	NA	0.9999	yes	yes	yes	yes	yes	yes	yes	yes	no	Fzd8 (-104260)	FZD8 (-61111)	0.03969	no	-0.0134872	yes	0.370704
chr18	11868021	11868521	mm10_chr18.11868021.11868521	2.11802	5.22e-06	2.22789	2.50591	0.990853	2.31829	2.51726	2.7774	1.70361	0.506505	1.51659	2.18665	0.995002	1.84054	MM10000000005605830	0.987918	NA	NA	yes	yes	yes	yes	yes	yes	yes	yes	no	Cables1 (+29051)	CABLES1 (+37085)	0.161809	yes	0.489702	yes	1.27197
chr18	12199973	12200473	mm10_chr18.12199973.12200473	1.71866	0.0023304	0.723284	2.68183	0.384396	0.65387	1.43482	2.4395	0.475944	1.8305	0.779917	2.11234	0.265472	1.2529	MM10000000005607490	NA	NA	NA	yes	yes	yes	yes	yes	yes	yes	yes	no	3110002H16Rik (+31506)	C18orf8 (+38883)	-0.0658	yes	-0.0172458	yes	-1.70607
chr18	12200525	12201025	mm10_chr18.12200525.12201025	1.71866	0.0023304	1.14837	2.28165	2.11656	1.42742	1.71765	2.53302	1.94427	0.40099	1.00016	1.93444	1.49307	1.63615	MM10000000005607492	0.994934	NA	0.992138	yes	yes	yes	yes	yes	yes	yes	yes	no	3110002H16Rik (+32058)	C18orf8 (+39752)	0.190582	yes	0.355133	yes	-0.194337
chr18	14050011	14050511	mm10_chr18.14050011.14050511	1.78894	0.00131637	0.896766	1.74102	0.369108	0.98083	1.20742	1.09521	0.366767	1.12545	0.89992	1.36353	0.585114	0.966467	MM10000000005616740	0.989726	NA	0.990992	yes	yes	yes	yes	yes	yes	yes	no	NA	Zfp521 (-77528)	NA	-0.008314	yes	0.875205	no	-0.00744763
chr18	15207829	15208329	mm10_chr18.15207829.15208329	1.85695	0.00235847	1.34539	3.32022	0.766034	1.92312	1.84322	2.58026	1.28953	2.56794	1.08135	2.65965	0.496107	1.80662	MM10000000005622529	0.956246	0.999542	NA	yes	yes	yes	yes	yes	yes	yes	yes	no	Kctd1 (-144497)	AQP4 (+155615)	0.238798	no	0.157234	yes	0.0921429
chr18	15208295	15208795	mm10_chr18.15208295.15208795	1.85695	0.00235847	1.66222	2.48884	2.39501	2.13496	2.31867	1.99442	4.06219	1.35856	1.07932	1.78782	1.78353	2.09687	MM10000000005622531	0.958093	NA	NA	yes	yes	yes	yes	yes	yes	yes	yes	no	Kctd1 (-144963)	AQP4 (+155204)	0.796096	no	0.276371	yes	0.892232
chr18	17099497	17099997	mm10_chr18.17099497.17099997	2.46939	4.12e-08	1.33937	1.34971	2.32899	1.65206	1.61892	1.57775	1.94208	1.61069	0.811325	1.01266	1.64864	1.53565	MM10000000005631987	0.835324	NA	0.996966	yes	yes	yes	yes	yes	yes	yes	yes	no	Cdh2 (-290501)	CDH2 (-274064)	0.563282	no	-0.322757	no	1.04625
chr18	19786024	19786524	mm10_chr18.19786024.19786524	2.50928	1.62e-13	0.999587	1.71603	1.19344	1.42534	1.14966	1.72619	1.08306	0.650072	0.647945	1.53295	1.00458	1.19353	MM10000000005645420	0.995434	NA	NA	yes	yes	yes	yes	yes	no	no	yes	no	Dsc3 (+215681)	DSC3 (+179558)	0.544694	yes	-0.344142	no	1.15047
chr18	19786200	19786700	mm10_chr18.19786200.19786700	2.50928	1.62e-13	1.00006	1.45349	2.58228	1.29846	1.3125	1.46565	3.17416	0.0791338	0.649053	1.17318	2.22464	1.49206	MM10000000005645421	0.989612	NA	0.998301	yes	yes	yes	yes	yes	no	no	yes	no	Dsc3 (+215505)	DSC3 (+179419)	0.506518	yes	-0.444075	no	1.43998
chr18	25464468	25464968	mm10_chr18.25464468.25464968	2.11075	0.000365831	2.09493	2.70595	2.54775	1.65995	1.607	2.08448	2.60377	1.52023	1.55613	2.17185	1.91496	2.04245	MM10000000005673812	0.972175	NA	0.997226	yes	yes	yes	yes	yes	yes	yes	yes	no	Celf4 (+289265)	CELF4 (+342498)	0.107004	no	0.379611	yes	0.605017
chr2	97593169	97593669	mm10_chr2.97593169.97593669	2.50649	1.47e-13	1.88226	2.96986	1.72466	2.87888	2.74482	2.77141	2.40329	0.445448	1.10048	2.33646	1.01738	2.025	MM10000000010323445	0.995975	NA	0.998466	yes	yes	yes	yes	yes	yes	yes	yes	yes	NONE	LRRC4C (+134683)	0.459304	yes	0.184257	yes	0.656005
chr4	66869893	66870393	mm10_chr4.66869893.66870393	3.28178	2.47e-15	1.53276	1.79337	1.61462	2.2383	2.09798	2.22786	2.24903	2.83037	1.17028	1.72986	1.14148	1.87508	MM10000000008587100	0.995537	0.999996	0.977847	yes	yes	yes	yes	yes	yes	yes	yes	yes	Tlr4 (+42559)	TLR4 (+33609)	0.577982	yes	0.601074	yes	0.603236
chr18	29416976	29417476	mm10_chr18.29416976.29417476	1.77324	0.00437899	1.2722	2.37214	1.76116	2.0099	2.20958	2.26433	2.68072	0.584442	0.999956	1.88202	1.44466	1.77101	MM10000000005693575	0.988471	NA	0.994934	yes	yes	yes	yes	yes	yes	yes	yes	no	Pik3c3 (-855521)	PIK3C3 (-842038)	0.38977	no	-0.0682857	yes	1.06159
chr18	30685780	30686280	mm10_chr18.30685780.30686280	1.98829	4.63e-05	1.69418	1.27287	2.25547	1.35483	1.43253	0.626855	2.20916	0.802642	0.999636	0.977207	1.47251	1.37254	MM10000000005699919	0.99795	NA	0.993126	yes	yes	yes	yes	yes	no	no	no	NA	Pik3c3 (+413283)	NA	0.04056	yes	0.509598	yes	1.10894
chr18	32340143	32340643	mm10_chr18.32340143.32340643	2.26061	2.38e-13	1.94353	1.87136	2.25518	1.04173	1.08259	0.549275	1.73969	2.10965	1.3625	1.59654	1.52361	1.55233	MM10000000005708190	0.996921	0.999037	NA	yes	yes	yes	yes	yes	yes	yes	yes	no	Bin1 (-36824)	BIN1 (-39783)	0.115524	no	0.584091	no	0.0654199
chr18	32340474	32340974	mm10_chr18.32340474.32340974	2.26061	2.38e-13	1.4991	4.12059	0.909983	1.97177	2.16058	2.2199	2.03286	3.41185	1.17465	3.235	0.63366	2.12454	MM10000000005708192	0.999515	NA	0.988761	no	yes	yes	yes	yes	yes	yes	yes	no	Bin1 (-36493)	BIN1 (-39322)	-0.162554	no	0.573766	no	1.20249
chr18	33322428	33322928	mm10_chr18.33322428.33322928	2.68099	3.05e-11	0.818107	0.745687	3.03173	1.12888	1.51739	1.76731	3.34509	2.76327	0.451107	0.786004	2.20813	1.68752	MM10000000005713102	0.952359	NA	0.999345	yes	yes	yes	yes	yes	yes	yes	no	NA	Stard4 (-108816)	NA	0.0616599	no	-0.0334702	no	1.33509
chr18	33346072	33346572	mm10_chr18.33346072.33346572	3.07767	3.42e-11	1.93801	2.60942	0.915848	1.13658	1.15163	1.80958	1.9583	2.12909	1.34129	2.10427	0.887513	1.63468	MM10000000005713220	0.959914	NA	NA	yes	yes	yes	yes	yes	yes	yes	yes	no	Nrep (+117312)	STARD4 (-133104)	0.315366	yes	0.0815241	no	-0.677731
chr18	33977257	33977757	mm10_chr18.33977257.33977757	2.75719	2.55e-06	0.999886	1.51917	1.29087	1.31529	1.01923	1.60484	1.45175	1.55647	0.898	1.24024	1.10258	1.27258	MM10000000005716376	0.982035	NA	NA	yes	yes	yes	yes	yes	yes	yes	yes	no	Epb41l4a (+29699)	EPB41L4A (+35959)	0.041268	yes	0.297126	yes	1.38336
chr18	33977420	33977920	mm10_chr18.33977420.33977920	2.75719	2.55e-06	1.53247	0.928534	1.07803	1.03692	0.732369	1.41566	1.70454	0.622687	1.13177	0.987564	0.954709	1.1023	MM10000000005716377	0.994045	NA	NA	yes	yes	yes	yes	yes	yes	yes	yes	no	Epb41l4a (+29536)	EPB41L4A (+33227)	0.149014	yes	0.642903	yes	1.69766
chr6	96442719	96443219	mm10_chr6.96442719.96443219	3.4686	1.86e-23	1.48389	2.70228	0.772539	3.08884	3.54846	3.77847	0.710866	0.402864	1.07922	2.27476	0.712389	1.8686	MM10000000007227119	0.99329	NA	NA	yes	yes	yes	yes	yes	yes	yes	yes	yes	1700123L14Rik (-276726)	FAM19A1 (+324075)	0.531566	yes	0.89193	yes	1.63296
chr18	39151651	39152151	mm10_chr18.39151651.39152151	2.16118	2.17e-07	1.78003	2.15066	0.949957	1.35931	1.6099	1.56485	1.36939	1.49887	1.40654	1.69972	0.739742	1.46627	MM10000000005742248	0.994198	NA	0.992503	yes	yes	yes	yes	yes	no	no	yes	no	Arhgap26 (+158756)	ARHGAP26 (+163467)	0.096834	yes	0.908112	yes	-0.178814
chr18	39151960	39152460	mm10_chr18.39151960.39152460	2.16118	2.17e-07	0.336628	1.33738	0.192269	0.285367	0.412002	0.28274	0.102088	1.01028	0.219919	0.94604	0.100088	0.474982	MM10000000005742250	0.690647	NA	NA	yes	yes	yes	yes	yes	no	no	yes	no	Arhgap26 (+159065)	ARHGAP26 (+163768)	0.18883	yes	0.0674323	yes	0.809147
chr18	39255397	39255897	mm10_chr18.39255397.39255897	2.9635	3.45e-16	1.80126	2.19486	0.427066	1.46257	1.74545	1.52286	0.943172	0.375233	1.39659	1.7338	0.0874818	1.24458	MM10000000005742767	0.988022	NA	NA	yes	yes	yes	yes	yes	yes	yes	yes	no	Nr3c1 (+235027)	ARHGAP26 (+296631)	0.469826	yes	1.05301	yes	0.340575
chr18	39359868	39360368	mm10_chr18.39359868.39360368	2.74489	9.49e-13	0.999842	1.95528	0.403945	0.975818	1.20171	1.64027	1.26693	2.29665	0.999939	1.76059	0.131537	1.23932	MM10000000005743289	0.933214	NA	NA	yes	yes	yes	yes	yes	yes	yes	yes	no	Nr3c1 (+130556)	NR3C1 (+192800)	0.26222	yes	0.688223	yes	-0.430184
chr18	39501021	39501521	mm10_chr18.39501021.39501521	2.50554	6.65e-08	0.605712	1.53493	1.12156	0.892586	0.912331	1.00995	0.7303	2.9959	0.352352	1.2346	1.03638	1.12969	MM10000000005743995	0.737303	NA	NA	yes	yes	yes	yes	yes	no	no	yes	yes	Nr3c1 (-10597)	NR3C1 (-10871)	0.709462	yes	0.0956071	yes	1.10924
chr18	40398976	40399476	mm10_chr18.40398976.40399476	1.5922	0.00889887	0.704491	3.37188	1.7801	1.35285	1.59661	1.90362	2.43862	2.99012	0.658546	2.59529	1.31021	1.88203	MM10000000005748485	NA	NA	NA	no	yes	yes	no	yes	no	no	yes	no	Kctd16 (+140865)	KCTD16 (+126128)	0.222586	yes	-0.51344	yes	0.21661
chr18	40399179	40399679	mm10_chr18.40399179.40399679	1.5922	0.00889887	1.05758	2.18752	1.33543	1.88645	1.82034	1.53989	1.94677	0.698197	0.982004	1.74418	0.96573	1.46946	MM10000000005748486	0.981509	NA	NA	yes	yes	yes	no	yes	no	no	yes	no	Kctd16 (+141068)	KCTD16 (+126231)	0.32034	yes	0.245771	yes	0.698047
chr18	42043130	42043630	mm10_chr18.42043130.42043630	1.9679	0.000552076	0.701968	1.13322	1.26287	1.98725	1.89107	2.16684	2.37848	0.921353	0.685157	1.00415	0.988396	1.37461	MM10000000005756705	0.992514	NA	0.990279	yes	yes	yes	yes	yes	yes	yes	yes	no	Sh3rf2 (-10287)	SH3RF2 (-11963)	0.257242	no	0.382161	no	0.147331
chr18	42737201	42737701	mm10_chr18.42737201.42737701	2.33946	8.12e-05	1.5237	1.86858	2.24326	1.31143	1.71379	1.32743	1.83349	0.0602135	1.01681	1.34849	1.70259	1.44998	MM10000000005760176	0.957611	NA	NA	yes	yes	yes	yes	yes	no	no	yes	no	Gpr151 (-157799)	GPR151 (-181345)	0.340098	no	0.282443	no	1.35438
chr18	42737418	42737918	mm10_chr18.42737418.42737918	2.33946	8.12e-05	0.893529	2.52801	1.49707	1.89446	2.07602	1.82725	1.00565	0.81976	0.562195	1.79103	0.932236	1.43884	MM10000000005760177	0.973733	NA	NA	yes	yes	yes	yes	yes	no	no	yes	no	Gpr151 (-158016)	GPR151 (-181560)	0.463512	no	-0.0318897	no	0.199335
chr18	42853530	42854030	mm10_chr18.42853530.42854030	1.84638	0.0037141	1.39643	3.61355	1.09395	1.45126	1.74194	2.01677	2.15588	2.73021	0.937506	2.35853	0.879613	1.85233	MM10000000005760757	NA	NA	NA	no	yes	yes	yes	no	no	no	yes	yes	Ppp2r2b (+205691)	PPP2R2B (+237204)	0.315288	no	0.0804557	no	1.59679
chr18	42853786	42854286	mm10_chr18.42853786.42854286	3.22863	2.13e-26	1.62347	1.39436	1.48509	1.4357	1.5142	1.71206	2.03317	0.331713	1.28456	1.10706	1.0368	1.35983	MM10000000005760759	0.9649	NA	0.983519	yes	yes	yes	yes	yes	no	no	yes	yes	Ppp2r2b (+205435)	PPP2R2B (+236952)	0.573034	no	0.821179	no	0.416504
chr18	44798028	44798528	mm10_chr18.44798028.44798528	1.62452	0.000527746	2.32741	1.00035	1.10469	1.57818	1.76352	1.34144	0.206536	0.339012	1.65086	0.785211	0.768299	1.16959	MM10000000005770480	0.971638	NA	0.997271	yes	yes	yes	yes	no	no	no	yes	no	Mcc (+13904)	TSSK1B (-18026)	0.179888	yes	0.784763	yes	0.508692
chr18	46976392	46976892	mm10_chr18.46976392.46976892	2.73064	3.68e-18	1.32316	2.27329	0.840969	2.86259	3.32165	3.2887	0.817999	1.1711	0.999976	1.94544	0.295494	1.74003	MM10000000005781372	0.999377	NA	0.991802	yes	yes	yes	yes	yes	yes	yes	yes	no	Commd10 (+17780)	COMMD10 (+34008)	0.456658	yes	0.144532	yes	-0.162006
chr18	47428584	47429084	mm10_chr18.47428584.47429084	1.72994	0.00145127	1.81942	2.01903	0.544957	1.00706	1.46539	1.49017	1.34287	0.961752	1.3242	1.43246	0.370993	1.25257	MM10000000005783633	0.993255	NA	NA	yes	yes	yes	yes	yes	yes	yes	yes	no	Sema6a (-60004)	SEMA6A (-47170)	0.25821	no	0.308491	yes	1.97719
chr18	47428918	47429418	mm10_chr18.47428918.47429418	1.72994	0.00145127	2.22575	1.02381	1.55478	1.41526	1.85721	1.09432	2.46687	1.20535	1.70642	0.863546	1.04372	1.49609	MM10000000005783634	0.98724	NA	NA	no	yes	yes	yes	yes	yes	yes	yes	no	Sema6a (-60338)	SEMA6A (-47383)	0.131384	no	1.03964	yes	0.873823
chr18	47837214	47837714	mm10_chr18.47837214.47837714	2.19613	0.000534966	0.576655	1.02577	1.66297	0.338252	0.169358	0.483672	2.07199	0.540719	0.455309	0.903786	1.24339	0.861079	MM10000000005785676	0.992021	NA	0.996073	yes	yes	yes	yes	yes	yes	yes	yes	no	Eno1b (-207871)	SEMA6A (-456458)	0.020042	no	0.047227	no	2.27959
chr18	51206782	51207282	mm10_chr18.51206782.51207282	2.01534	0.00010956	1.97355	2.98401	1.5134	2.60281	2.36676	2.35511	1.62143	1.71555	1.26839	2.25458	1.23229	1.98981	MM10000000005802524	0.999196	NA	NA	yes	yes	yes	yes	yes	yes	yes	yes	no	Prr16 (+89134)	PRR16 (+108319)	0.102762	yes	0.432973	yes	1.25756
chr18	51995422	51995922	mm10_chr18.51995422.51995922	2.14661	0.000217764	1.00023	1.7787	0.754173	1.64344	1.63079	1.6143	0.635952	2.59341	0.771463	1.3809	0.471244	1.29769	MM10000000005806467	0.796476	NA	NA	yes	yes	yes	yes	no	yes	no	yes	no	Gm4950 (-129791)	POU3F2 (-333801)	-0.013904	yes	0.387518	no	-0.522883
chr18	53158614	53159114	mm10_chr18.53158614.53159114	2.83545	1.98e-20	1.55563	1.92944	2.03251	2.0409	1.94862	2.639	3.61414	1.50208	1.25762	1.52959	1.61217	1.96925	MM10000000005812283	0.961107	NA	0.997404	yes	yes	yes	yes	yes	yes	yes	yes	no	Snx2 (-17501)	SNX2 (-18481)	0.077058	yes	0.63913	no	0.320546
chr18	53159068	53159568	mm10_chr18.53159068.53159568	2.83545	1.98e-20	0.935908	2.35203	1.93951	0.788902	1.11105	1.65639	3.06085	2.73114	0.678342	1.60723	1.44421	1.66414	MM10000000005812285	0.868541	NA	0.986761	no	yes	yes	yes	yes	yes	yes	yes	no	Snx2 (-17047)	SNX2 (-18015)	0.060122	yes	0.268578	no	0.33938
chr18	53749197	53749697	mm10_chr18.53749197.53749697	2.11495	0.00732163	1.20266	0.810311	0.469819	1.02772	1.12709	1.89018	1.44425	0.29727	0.999941	0.753741	0.270842	0.935802	MM10000000005815236	0.982914	NA	NA	yes	yes	yes	yes	yes	no	no	yes	no	Cep120 (-4900)	CEP120 (-4917)	-0.012234	no	0.801203	no	0.141395
chr18	55353704	55354204	mm10_chr18.55353704.55354204	2.45185	1.38e-07	1.8631	2.76899	2.98605	1.56652	1.96083	1.65074	2.93057	1.63177	1.30006	1.97	2.20644	2.07592	MM10000000005823258	0.88806	NA	NA	yes	yes	yes	yes	yes	yes	yes	yes	no	Zfp608 (-363774)	ZNF608 (-431099)	0.143494	yes	0.475339	yes	0.973789
chr18	55567324	55567824	mm10_chr18.55567324.55567824	2.01081	0.0099072	1.33748	2.25073	1.74404	1.94062	1.93392	2.52539	3.13836	1.3334	0.999923	1.87332	1.48157	1.86898	MM10000000005824326	0.999402	NA	NA	no	no	no	no	no	no	no	yes	no	Zfp608 (-577394)	ZNF608 (-679569)	0.82572	yes	0.505972	yes	2.45949
chr18	55764323	55764823	mm10_chr18.55764323.55764823	2.72555	8.51e-16	0.94859	1.36096	2.39401	1.04817	1.10963	1.06511	3.2683	0.317675	0.844858	1.10648	1.80382	1.38796	MM10000000005825311	0.94464	NA	NA	yes	yes	yes	yes	yes	no	no	yes	no	Gramd3 (-667559)	GRAMD2B (-699655)	0.13799	yes	0.336429	no	1.59652
chr18	56476997	56477497	mm10_chr18.56476997.56477497	2.64171	2.81e-11	1.68404	1.29671	0.966583	1.11812	1.50985	1.24355	2.5411	1.66789	1.3145	1.21892	0.812019	1.39757	MM10000000005828875	0.99752	NA	0.996992	yes	yes	yes	yes	yes	yes	yes	yes	no	Gramd3 (+45115)	GRAMD2B (+112524)	-0.00489	no	0.993895	no	-0.237563
chr18	58360180	58360680	mm10_chr18.58360180.58360680	2.23714	0.000609356	0.87419	2.4444	1.98699	0.882317	1.05014	1.59574	2.20258	1.03888	0.720014	2.07208	1.49881	1.48783	MM10000000005838291	0.983965	NA	NA	yes	yes	yes	yes	yes	yes	yes	no	NA	Fbn2 (-150504)	NA	0.0631538	no	0.0301798	no	1.11154
chr18	59151842	59152342	mm10_chr18.59151842.59152342	2.02533	0.000524886	1.67205	4.04173	1.41724	2.35522	2.62599	2.93948	1.75461	2.22481	1.07704	3.04843	0.919063	2.1887	MM10000000005842249	0.996353	NA	NA	yes	yes	yes	yes	yes	yes	yes	yes	no	Chsy3 (-23309)	CHSY3 (-23628)	0.05918	no	0.105325	no	-0.338004
chr18	61122545	61123045	mm10_chr18.61122545.61123045	3.0104	5.65e-15	1.52405	1.91336	1.25129	2.57156	3.13121	2.55333	2.07875	1.34536	1.35046	1.76185	0.857211	1.84895	MM10000000005852102	0.992671	NA	0.979094	yes	yes	yes	yes	yes	yes	yes	no	NA	Csf1r (+16943)	NA	0.051306	yes	0.534306	no	-0.847472
chr18	61245020	61245520	mm10_chr18.61245020.61245520	2.47646	1.17e-07	0.590715	1.25652	0.978059	0.0615044	0.264612	0.646201	0.913134	1.67376	0.435855	1.06546	0.754799	0.785511	MM10000000005852715	0.980565	NA	NA	no	yes	yes	yes	yes	no	no	yes	no	Pde6a (+24788)	PDE6A (+28876)	0.000463999	no	0.0675997	yes	-0.34749
chr18	61245249	61245749	mm10_chr18.61245249.61245749	2.47646	1.17e-07	1.09142	1.63361	1.51515	0.942704	1.3874	1.00534	1.69756	0.824528	0.946273	1.08644	1.12405	1.20495	MM10000000005852716	0.997831	NA	NA	no	yes	yes	yes	yes	no	no	yes	no	Pde6a (+25017)	PDE6A (+29828)	0.120372	no	0.223068	yes	0.398917
chr18	61245451	61245951	mm10_chr18.61245451.61245951	2.47646	1.17e-07	1.24634	1.15767	1.52907	0.658018	0.957959	0.239635	2.65041	0.78637	0.999995	0.966549	1.19078	1.12571	MM10000000005852717	0.950134	NA	NA	yes	yes	yes	yes	yes	no	no	yes	no	Pde6a (+25219)	PDE6A (+29828)	0.155334	no	0.602119	yes	1.22122
chr18	61491671	61492171	mm10_chr18.61491671.61492171	2.63913	1.31e-05	0.897884	1.88293	1.34637	0.654207	1.29952	1.13409	1.3515	1.66824	0.675303	1.31314	1.0281	1.20466	MM10000000005853948	0.821667	NA	NA	yes	yes	yes	yes	yes	yes	yes	yes	no	Arhgef37 (+44615)	ARHGEF37 (+53219)	0.231906	no	0.0248837	no	-0.206715
chr18	61660991	61661491	mm10_chr18.61660991.61661491	1.9055	1.95e-05	0.999632	1.6188	1.03199	1.31726	1.41231	1.10332	1.37967	1.84043	0.929372	1.28956	0.724919	1.24066	MM10000000005854795	0.993442	NA	0.991076	yes	yes	yes	no	yes	yes	no	yes	no	Il17b (-26694)	IL17B (-32816)	0.087676	yes	0.590199	no	0.491752
chr18	61900780	61901280	mm10_chr18.61900780.61901280	2.07156	5.96e-11	1.98682	1.91463	1.05889	1.03729	0.874009	1.07563	0.935484	0.731935	1.55258	1.44601	0.692019	1.20957	MM10000000005855994	0.961207	NA	NA	yes	yes	yes	yes	yes	no	no	yes	no	Ablim3 (+10794)	ABLIM3 (+12492)	0.44169	yes	1.03492	yes	1.24018
chr18	61925775	61926275	mm10_chr18.61925775.61926275	2.04707	2.25e-07	1.41229	1.08617	1.21031	0.651731	0.640523	1.13366	1.29036	0.987905	1.00023	1.08091	1.07339	1.05159	MM10000000005856119	0.937198	NA	0.994074	yes	yes	yes	yes	yes	yes	yes	yes	no	Ablim3 (-14201)	ABLIM3 (-11235)	-0.044874	yes	0.463557	yes	0.614402
chr18	62506874	62507374	mm10_chr18.62506874.62507374	1.69157	0.0057802	0.849735	1.09929	3.05613	0.812861	1.08837	0.994072	3.38386	1.25512	0.734115	0.898279	2.21213	1.48945	MM10000000005859024	0.943831	NA	0.998609	yes	yes	yes	yes	yes	no	no	yes	no	Fbxo38 (+41619)	FBXO38 (+55238)	-0.102192	yes	-0.0506162	yes	0.62621
chr18	26087557	26088057	mm10_chr18.26087557.26088057	1.53909	0.00135475	1.21143	3.05433	0.783356	2.80609	2.58834	3.25995	1.62089	1.11955	0.999733	2.52948	0.562459	1.86687	MM10000000005676928	0.973574	NA	NA	yes	yes	yes	yes	yes	yes	yes	yes	yes	Celf4 (-333824)	CELF4 (-305616)	0.25077	no	-0.0867907	no	0.57266
chr18	62515100	62515600	mm10_chr18.62515100.62515600	1.90499	8.17e-08	1.94567	2.11629	1.03619	1.91006	2.27587	2.61396	1.44443	0.217328	1.61756	2.06718	0.914816	1.65085	MM10000000005859065	0.999727	NA	NA	yes	yes	yes	yes	yes	no	no	yes	yes	Fbxo38 (+33393)	FBXO38 (+43394)	1.16409	yes	0.865364	yes	0.101513
chr18	62515753	62516253	mm10_chr18.62515753.62516253	2.05045	5.08e-10	1.00027	2.80989	0.960158	0.937995	1.3868	1.98662	1.19621	0.965005	0.868371	2.0223	0.761043	1.35406	MM10000000005859069	0.946511	0.996808	0.995229	yes	yes	yes	yes	yes	yes	yes	yes	no	Fbxo38 (+32740)	FBXO38 (+42676)	0.182212	yes	0.195019	yes	-0.321401
chr18	63274840	63275340	mm10_chr18.63274840.63275340	1.82863	0.00491578	1.0002	0.741254	0.98153	1.9264	2.21129	2.45944	2.12596	0.152915	0.954643	0.752358	0.997834	1.30035	MM10000000005862864	0.862489	NA	0.991554	yes	yes	yes	yes	yes	no	no	yes	no	Piezo2 (+112093)	PIEZO2 (+130978)	0.042076	no	0.361855	no	0.530494
chr18	63877327	63877827	mm10_chr18.63877327.63877827	2.42516	0.000939468	0.705863	1.16922	0.43143	0.538365	0.372963	1.17688	0.286566	1.87269	0.594124	0.930778	0.293638	0.761138	MM10000000005865876	0.879333	NA	NA	yes	yes	yes	yes	yes	yes	yes	yes	no	Wdr7 (+168882)	WDR7 (+239427)	-0.185532	no	0.319954	no	-0.267979
chr18	64017003	64017503	mm10_chr18.64017003.64017503	1.79602	0.00497562	1.00007	1.93084	0.680054	0.348609	0.613434	0.600877	0.498058	0.277279	0.89388	1.55523	0.457732	0.805097	MM10000000005866575	0.994061	NA	0.994266	yes	yes	yes	yes	no	no	no	yes	no	St8sia3 (-237106)	BOD1L2 (-72942)	-0.048872	no	0.0979246	no	0.51352
chr18	64017120	64017620	mm10_chr18.64017120.64017620	1.79602	0.00497562	1.10784	1.84333	1.39408	1.06197	1.09055	1.15524	1.05861	0.117072	0.999533	1.4869	1.09046	1.12778	MM10000000005866575	0.994061	NA	0.994266	yes	yes	yes	yes	no	no	no	yes	no	St8sia3 (-236989)	BOD1L2 (-72625)	0.047416	no	0.150887	no	1.55707
chr18	64017262	64017762	mm10_chr18.64017262.64017762	1.79602	0.00497562	1.27755	2.59297	1.92683	0.843914	0.727861	1.19713	3.00702	1.6569	1.00049	2.0208	1.64741	1.62717	MM10000000005866576	0.995625	NA	NA	no	yes	yes	yes	no	no	no	yes	no	St8sia3 (-236847)	BOD1L2 (-72482)	0.238334	no	0.239866	no	1.2573
chr18	66782160	66782660	mm10_chr18.66782160.66782660	2.8853	8.88e-13	2.19165	3.11043	1.86624	3.62166	3.76485	3.71147	2.42053	1.05764	1.55909	2.51447	1.56053	2.48896	MM10000000005880401	0.995357	NA	0.989807	yes	yes	yes	yes	yes	yes	yes	yes	no	Mc4r (+78062)	MC4R (+89125)	0.152364	yes	0.829058	no	1.75677
chr18	66872372	66872872	mm10_chr18.66872372.66872872	2.49878	0.000211498	1.02161	2.69076	2.13766	2.88808	3.05179	2.0705	1.98603	2.97627	0.891507	1.87927	1.46987	2.09667	MM10000000005880852	0.991751	NA	NA	yes	yes	no	yes	yes	no	no	yes	no	Mc4r (-12150)	MC4R (-12791)	-0.15827	no	0.875514	no	1.7698
chr18	67098462	67098962	mm10_chr18.67098462.67098962	2.91188	3.05e-16	1.4196	3.73362	2.2776	3.16905	3.4428	3.52331	1.78889	1.0846	1.12992	2.81249	1.52811	2.35545	MM10000000005881982	0.998732	NA	0.984685	yes	yes	yes	yes	yes	yes	yes	no	NA	Gnal (+10376)	NA	0.062174	no	0.295368	yes	0.7102
chr18	70912838	70913338	mm10_chr18.70912838.70913338	3.08839	5.11e-25	0.763032	1.40851	0.873613	1.80577	1.51015	0.936453	0.954819	0.543055	0.551794	1.18022	0.794515	1.02927	MM10000000005901054	0.98736	NA	NA	yes	yes	yes	yes	yes	yes	yes	yes	no	Mbd2 (+344899)	MBD2 (+321805)	0.092898	yes	-0.191248	no	0.43478
chr18	70913186	70913686	mm10_chr18.70913186.70913686	3.08839	5.11e-25	1.41149	3.03994	1.26464	0.576548	0.896108	1.69074	0.8412	1.32812	1.10496	2.34285	1.00915	1.40961	MM10000000005901056	0.846537	NA	NA	yes	yes	yes	yes	yes	yes	yes	yes	no	Mbd2 (+345247)	MBD2 (+322163)	0.071952	yes	0.545723	no	-0.546673
chr18	71015687	71016187	mm10_chr18.71015687.71016187	1.6999	0.000272332	1.10102	1.62321	0.360368	0.945622	0.693851	1.09825	0.554987	0.901358	0.959885	1.27018	0.50071	0.909949	MM10000000005901568	0.986558	NA	0.990108	yes	yes	yes	no	yes	yes	no	yes	no	Mbd2 (+447748)	MBD2 (+471455)	0.44457	yes	0.369622	yes	0.979383
chr18	74485600	74486100	mm10_chr18.74485600.74486100	1.85531	0.000276652	0.849807	0.611727	2.50583	1.55311	1.65451	1.42693	3.26344	0.701247	0.748918	0.502814	2.0975	1.44689	MM10000000005918918	0.972848	NA	0.999727	yes	yes	yes	yes	yes	no	no	yes	no	Myo5b (+43313)	MYO5B (+48203)	0.148976	no	0.745699	no	0.412574
chr18	74485892	74486392	mm10_chr18.74485892.74486392	1.85531	0.000276652	1.45593	3.42993	1.89453	1.19054	1.64241	2.19951	2.95174	1.48928	0.99969	2.56872	1.44001	1.93294	MM10000000005918919	0.991216	NA	NA	yes	yes	yes	yes	yes	no	no	yes	no	Myo5b (+43605)	MYO5B (+48558)	0.075818	no	0.405921	no	0.567423
chr18	74539119	74539619	mm10_chr18.74539119.74539619	2.7555	8.24e-12	1.80629	1.34332	1.26925	2.00354	2.26425	1.71993	3.04243	0.967852	1.52951	1.25603	1.21335	1.67416	MM10000000005919185	0.726896	NA	NA	yes	yes	yes	yes	yes	yes	yes	yes	no	Myo5b (+96832)	MYO5B (+114281)	0.05515	yes	0.586364	no	-0.0720038
chr18	74539366	74539866	mm10_chr18.74539366.74539866	2.7555	8.24e-12	1.37244	1.31793	1.45474	0.845675	0.97831	0.3602	1.6346	2.27386	1.00034	1.05617	0.892029	1.19875	MM10000000005919187	0.902861	NA	NA	no	yes	yes	yes	yes	yes	yes	yes	no	Myo5b (+97079)	MYO5B (+114384)	0.034694	yes	0.266321	no	0.126808
chr18	74692379	74692879	mm10_chr18.74692379.74692879	3.41559	5.31e-06	1.37635	2.31702	1.40704	1.46009	1.57879	2.35756	1.77799	0.394816	1.00019	1.85337	0.936723	1.49636	MM10000000005919952	0.939071	NA	NA	yes	yes	yes	yes	yes	yes	yes	yes	no	Acaa2 (-86568)	ACAA2 (-102178)	0.090756	no	0.382391	no	1.09323
chr18	74802975	74803475	mm10_chr18.74802975.74803475	2.48299	1.22e-05	2.36622	2.88286	2.21686	2.80754	2.92014	2.49177	3.28577	1.81338	1.86613	2.25124	1.74504	2.42245	MM10000000005920505	0.966611	NA	0.992402	yes	yes	yes	yes	yes	yes	yes	yes	no	Acaa2 (+24028)	ACAA2 (+27604)	0.100114	no	1.171	no	0.786477
chr18	75244899	75245399	mm10_chr18.75244899.75245399	2.55096	7.4e-16	1.39072	1.32554	1.58231	0.82158	1.19977	1.00396	2.08319	0.861341	1.23038	1.3234	1.23666	1.27808	MM10000000005922714	0.909301	NA	0.997089	yes	yes	yes	yes	yes	yes	yes	no	NA	Smad7 (-122380)	NA	0.055926	yes	1.00439	yes	0.831107
chr18	75245320	75245820	mm10_chr18.75245320.75245820	2.55096	7.4e-16	1.40653	2.36382	0.565085	1.32016	1.55993	1.5112	1.79078	1.32193	1.14211	1.99657	0.624857	1.41845	MM10000000005922716	0.993594	NA	NA	yes	yes	yes	yes	yes	yes	yes	no	NA	Smad7 (-121959)	NA	0.062306	yes	0.783918	yes	-0.370993
chr18	78523227	78523727	mm10_chr18.78523227.78523727	2.63285	4.61e-10	1.71255	2.69605	1.88422	1.99129	2.00265	2.40066	2.45402	1.02269	1.3116	2.07427	1.20979	1.88725	MM10000000005939106	0.991203	NA	NA	yes	yes	yes	yes	yes	yes	yes	yes	no	Gm6133 (+173723)	SLC14A2 (-324530)	0.120928	yes	2.83386e-05	yes	-0.100135
chr18	78523415	78523915	mm10_chr18.78523415.78523915	2.63285	4.61e-10	1.7597	1.96486	0.867196	1.86958	2.16356	1.96847	2.28698	0.824096	1.1881	1.55482	0.687258	1.55769	MM10000000005939107	NA	NA	NA	yes	yes	yes	yes	yes	yes	yes	yes	no	Gm6133 (+173911)	SLC14A2 (-325553)	0.110116	yes	-0.0656772	yes	-0.020997
chr18	79181477	79181977	mm10_chr18.79181477.79181977	3.33527	1.04e-20	2.26429	2.37839	1.37266	2.97428	2.77617	2.80355	1.4238	1.39176	1.58727	2.18536	1.13038	2.02617	MM10000000005942397	0.961454	NA	0.991084	yes	yes	yes	yes	yes	yes	yes	no	NA	Setbp1 (-72336)	NA	0.076612	yes	1.00375	no	2.01231
chr18	82051440	82051940	mm10_chr18.82051440.82051940	1.74779	0.000951517	1.33629	2.12023	1.05847	1.15262	1.52675	1.68365	0.0873636	1.44585	1.23355	1.73026	0.989697	1.30588	MM10000000005956747	0.983692	NA	0.993944	yes	yes	yes	no	no	yes	no	yes	no	Galr1 (+355087)	GALR1 (+348623)	0.06141	yes	0.80279	no	0.421822
chr18	82051655	82052155	mm10_chr18.82051655.82052155	1.74779	0.000951517	1.67573	1.47887	1.70455	0.556343	0.490331	0.986986	2.23032	2.2645	1.10061	1.41411	1.29368	1.38146	MM10000000005956748	0.989825	NA	NA	yes	yes	yes	no	no	yes	no	no	NA	Galr1 (+354872)	NA	0.02669	yes	0.645148	no	-0.0515531
chr18	82494999	82495499	mm10_chr18.82494999.82495499	3.05225	1.54e-10	0.844785	1.2257	0.308458	0.60932	0.768689	1.01423	0.414004	0.460043	0.90693	1.00589	0.170406	0.702587	MM10000000005958965	0.856966	NA	0.982887	yes	yes	yes	yes	yes	yes	yes	yes	no	Mbp (+20087)	MBP (+23524)	-0.0156524	no	0.708391	yes	0.506411
chr18	82618661	82619161	mm10_chr18.82618661.82619161	2.53581	3.57e-09	0.942534	1.66296	0.186008	0.500844	0.572183	0.969674	0.18781	1.39925	1.00025	1.4522	0.0966863	0.815491	MM10000000005959583	0.963971	NA	NA	yes	yes	yes	yes	yes	no	no	yes	no	Zfp236 (+73972)	ZNF236 (+104812)	0.285886	yes	0.898166	yes	-0.588195
chr18	84380528	84381028	mm10_chr18.84380528.84381028	2.30693	1.57e-12	1.94283	1.87537	1.71713	1.39299	1.66445	1.254	2.62404	0.745686	1.46461	1.28475	1.51351	1.58903	MM10000000005968392	0.903086	NA	0.998677	yes	yes	yes	yes	yes	yes	yes	yes	no	Zfp407 (+208726)	ZNF407 (+213958)	0.278242	yes	0.701132	no	0.720884
chr18	85658828	85659328	mm10_chr18.85658828.85659328	1.91726	1.45e-06	1.85813	3.32949	1.31616	0.663637	1.01559	1.33787	2.4324	1.29572	1.46172	2.74529	1.23159	1.69887	MM10000000005974784	0.998462	NA	0.998513	yes	yes	yes	yes	yes	no	no	yes	no	Timm21 (-707554)	FBXO15 (+609699)	-0.071518	yes	0.692932	yes	1.933
chr18	85659066	85659566	mm10_chr18.85659066.85659566	1.91726	1.45e-06	2.46336	1.91175	2.51997	1.79047	2.2401	2.13434	2.90548	0.546466	1.72635	1.77423	1.90569	1.99256	MM10000000005974785	0.998274	NA	0.998826	yes	yes	yes	yes	yes	no	no	yes	no	Timm21 (-707792)	FBXO15 (+609954)	0.074754	yes	0.439965	yes	1.34843
chr19	10299263	10299763	mm10_chr19.10299263.10299763	3.10534	4.18e-10	1.31075	2.83586	1.65158	0.547448	0.834043	1.064	2.97902	4.17504	1.00007	2.24731	1.25631	1.80922	MM10000000005290834	0.98555	NA	0.991623	yes	yes	yes	yes	yes	yes	yes	yes	no	Dagla (+5364)	DAGLA (+5967)	0.167118	no	0.410593	no	0.754477
chr19	10346644	10347144	mm10_chr19.10346644.10347144	2.58653	5.3e-07	1.83453	3.79073	0.179569	0.729132	1.32056	2.15719	0.916997	2.00005	1.45512	2.94614	0.0932505	1.58393	MM10000000005291071	0.993524	NA	NA	no	yes	yes	yes	yes	yes	yes	yes	no	Dagla (-42017)	SYT7 (-38050)	0.06928	no	0.745687	yes	1.32932
chr19	15048346	15048846	mm10_chr19.15048346.15048846	2.49053	1.46e-06	1.74735	1.32671	0.570088	0.824147	0.880819	1.1139	0.397707	0.801752	1.61875	1.19563	0.169936	0.96789	MM10000000005314579	0.952308	NA	NA	yes	yes	yes	yes	yes	no	no	yes	no	Tle4 (-450613)	TLE4 (-452106)	0.497162	yes	1.17686	no	1.3233
chr19	16543570	16544070	mm10_chr19.16543570.16544070	2.28334	0.00724144	1.16133	1.89686	0.915523	0.327337	0.275898	0.885062	0.953766	2.62632	0.965187	1.73697	0.428058	1.10657	MM10000000005322056	0.986074	NA	NA	no	no	no	no	no	no	no	yes	no	Gna14 (+108153)	GNA14 (+137571)	0.168682	no	0.356463	no	1.11889
chr19	16576718	16577218	mm10_chr19.16576718.16577218	2.18014	1.51e-08	2.03879	2.783	0.315071	2.48078	2.71364	3.23526	0.962558	1.25501	1.65393	2.27302	0.0592173	1.7973	MM10000000005322221	0.983375	NA	0.991731	yes	yes	yes	yes	yes	no	no	yes	no	Gna14 (+141301)	GNA14 (+172044)	0.18906	yes	0.915054	no	0.0810377
chr19	19218649	19219149	mm10_chr19.19218649.19219149	1.83954	1.48e-05	1.05878	1.72279	2.14181	2.37927	2.13774	1.62298	3.00708	3.50534	0.951622	1.28017	1.53991	1.94068	MM10000000005335431	0.996694	NA	0.994161	yes	yes	yes	yes	yes	yes	yes	yes	no	Rorb (-217782)	RORB (-109196)	0.074794	no	0.413378	no	0.294206
chr19	25089203	25089703	mm10_chr19.25089203.25089703	2.61645	5.08e-19	1.64417	1.66364	2.07379	1.43906	1.63399	1.20298	2.48301	0.703204	1.28891	1.23052	1.6321	1.54503	MM10000000005364784	0.964498	NA	0.999024	yes	yes	yes	yes	yes	no	no	yes	no	Dock8 (+89924)	DOCK8 (+112539)	-0.075808	no	0.644204	no	0.424782
chr19	26644457	26644957	mm10_chr19.26644457.26644957	1.93989	0.00687926	1.14281	1.87862	1.33335	1.0581	1.38975	2.30709	1.50354	1.82342	0.999702	1.40558	1.18971	1.45742	MM10000000005372560	0.859947	NA	NA	yes	yes	yes	yes	yes	no	no	yes	no	Smarca2 (+39655)	SMARCA2 (+29024)	0.799456	no	0.20486	yes	0.996835
chr19	26968125	26968625	mm10_chr19.26968125.26968625	2.64719	0.000313518	1.51806	1.9414	1.12944	1.73402	1.65158	2.20791	2.29806	1.62987	1.20891	1.74982	0.90954	1.63442	MM10000000005374178	0.982583	NA	NA	yes	yes	yes	yes	yes	no	no	yes	no	Gm815 (+82450)	VLDLR (-269834)	0.12599	no	0.178611	yes	0.651548
chr19	28029574	28030074	mm10_chr19.28029574.28030074	2.98386	0.00145776	0.130522	0.785137	1.76155	0.862649	0.741333	0.390309	1.28126	0.877212	0.252756	0.763535	1.30183	0.831645	MM10000000005379486	0.918317	NA	NA	yes	yes	yes	yes	yes	yes	yes	yes	no	Rfx3 (-46876)	RFX3 (-19768)	0.176658	no	0.199958	no	-0.37729
chr19	28189754	28190254	mm10_chr19.28189754.28190254	1.9126	0.000122651	0.768218	1.0613	1.06986	0.171888	0.353695	0.766906	0.6991	0.272577	0.430162	0.96045	0.709095	0.660296	MM10000000005380287	NA	NA	NA	no	no	no	no	no	no	no	yes	no	Rfx3 (-207056)	RFX3 (-233093)	0.106954	yes	-0.0383657	no	-0.174446
chr19	28261373	28261873	mm10_chr19.28261373.28261873	2.73829	1.76e-13	0.574419	0.84513	2.10496	0.807692	0.931361	0.498721	2.44548	1.747	0.297301	0.724973	1.63612	1.14665	MM10000000005380645	0.860084	NA	0.99487	yes	yes	yes	yes	yes	yes	yes	yes	no	Rfx3 (-278675)	RFX3 (-301014)	0.0791	no	-0.271372	no	0.677373
chr19	28334755	28335255	mm10_chr19.28334755.28335255	2.08336	1.86e-06	1.25461	1.26441	1.84274	1.61761	1.75184	1.42962	1.87606	1.32516	0.999822	1.05334	1.29928	1.42859	MM10000000005381012	0.775231	NA	0.999188	yes	yes	yes	yes	yes	yes	yes	yes	no	Glis3 (+345072)	GLIS3 (+384926)	-0.022408	yes	0.607089	no	0.268847
chr19	28408075	28408575	mm10_chr19.28408075.28408575	3.05809	2.04e-12	1.47876	3.75763	1.89804	2.7822	3.10859	3.19286	2.51342	0.82486	1.00006	2.82125	1.13968	2.22885	MM10000000005381378	0.999369	NA	0.99329	yes	yes	yes	yes	yes	yes	yes	no	NA	Glis3 (+271752)	NA	0.262432	no	0.0105451	yes	2.10055
chr19	28743356	28743856	mm10_chr19.28743356.28743856	2.41673	2.3e-05	0.999869	2.40548	0.502468	0.776722	1.25167	2.00338	1.11663	3.30504	0.939405	1.8526	0.396376	1.4136	MM10000000005383055	0.822825	NA	NA	yes	no	yes	yes	yes	yes	no	yes	no	Glis3 (-63529)	GLIS3 (-53639)	0.188424	yes	0.192812	yes	-0.817251
chr19	28889208	28889708	mm10_chr19.28889208.28889708	2.79339	0.000551556	1.23074	1.58489	2.00703	0.708542	1.05297	0.124246	2.43169	3.40285	0.969068	1.11115	1.26444	1.44433	MM10000000005383784	0.967465	NA	0.995459	no	no	no	no	no	no	no	yes	no	Slc1a1 (+54384)	SLC1A1 (+66756)	-0.02004	no	0.046054	no	-0.269572
chr19	29332101	29332601	mm10_chr19.29332101.29332601	2.80563	2.19e-10	0.742556	1.31652	0.596253	0.244399	0.530083	1.37516	1.31854	0.83424	0.462102	1.13238	0.288516	0.803704	MM10000000005385998	0.928192	NA	NA	no	yes	yes	yes	yes	no	no	yes	no	Rln1 (+2319)	RLN2 (+4382)	-0.003766	no	-0.265185	no	0.170606
chr19	30176510	30177010	mm10_chr19.30176510.30177010	2.15976	0.0011617	1.18014	2.0027	1.05082	0.962677	1.21967	0.940553	1.52362	2.519	0.872536	1.43229	0.861489	1.32414	MM10000000005390220	0.990244	NA	NA	yes	yes	yes	yes	yes	yes	yes	no	NA	Gldc (-1342)	NA	0.124782	no	0.167726	no	0.210164
chr19	33133943	33134443	mm10_chr19.33133943.33134443	2.77929	1.72e-20	1.19682	1.7984	1.14456	2.0248	2.27036	2.40978	1.60332	1.09991	0.949234	1.459	0.893417	1.53178	MM10000000005405007	0.921558	NA	0.98995	yes	yes	yes	yes	yes	yes	yes	yes	no	Rnls (+258072)	RNLS (+300397)	0.77955	yes	0.00491726	yes	1.60102
chr19	34570064	34570564	mm10_chr19.34570064.34570564	3.22863	2.13e-26	1.37706	1.69911	1.42189	0.854069	1.1805	1.50454	2.27845	1.14957	1.03267	1.45731	1.16968	1.37499	MM10000000005412188	0.988957	NA	NA	yes	yes	yes	yes	yes	no	no	yes	yes	Ifit3 (-13217)	IFIT2 (+18446)	-0.03783	yes	0.549287	yes	0.319067
chr19	36264594	36265094	mm10_chr19.36264594.36265094	2.06794	3.63e-13	1.31031	2.51282	1.49749	2.25776	2.55589	2.02427	1.99964	2.47335	0.99982	1.80078	1.28689	1.88355	MM10000000005420661	0.987232	NA	0.996722	yes	yes	yes	yes	yes	yes	yes	yes	no	Pcgf5 (-83465)	PCGF5 (-131444)	0.199396	yes	0.0788742	no	0.859511
chr19	36629292	36629792	mm10_chr19.36629292.36629792	2.00269	0.000478166	0.768396	2.00348	1.17135	1.28838	1.21267	1.29315	1.48177	0.234043	0.833428	1.51553	1.01991	1.16565	MM10000000005422484	0.951535	NA	0.989549	yes	yes	yes	yes	yes	no	no	yes	no	Hectd2 (+74874)	PPP1R3C (+105133)	0.085858	yes	0.341493	no	0.624001
chr19	40507313	40507813	mm10_chr19.40507313.40507813	2.46614	5.42e-07	1.37173	2.32182	2.01848	2.2851	1.96462	2.25029	2.29961	0.918357	1.00046	1.72598	1.45522	1.78288	MM10000000005441874	0.983596	NA	0.990585	yes	yes	yes	yes	yes	yes	yes	no	NA	Sorbs1 (+6173)	NA	0.068126	no	0.393296	no	0.794631
chr19	40570748	40571248	mm10_chr19.40570748.40571248	3.40885	9.66e-07	0.99992	0.556326	1.37036	0.0612655	0.336882	0.349054	1.4017	0.77055	0.720159	0.538894	0.885412	0.726411	MM10000000005442191	0.993518	NA	NA	yes	yes	yes	yes	yes	no	no	yes	no	Aldh18a1 (+17465)	ALDH18A1 (+27794)	0.112274	no	0.417236	no	0.619491
chr19	41286266	41286766	mm10_chr19.41286266.41286766	3.13149	1.95e-18	1.7837	3.11143	1.21327	2.07585	2.61989	2.58434	0.989205	1.11519	1.38638	2.49768	0.965679	1.84933	MM10000000005445769	0.987562	NA	0.991216	yes	yes	yes	yes	yes	no	no	yes	no	Tm9sf3 (-22512)	TM9SF3 (-21980)	0.12485	yes	0.688728	no	-0.113118
chr19	43480436	43480936	mm10_chr19.43480436.43480936	2.41119	0.000306302	0.803462	1.42239	0.658978	0.739834	0.784637	1.64157	0.888061	1.32456	0.762597	1.15403	0.509408	0.971775	MM10000000005456740	0.980441	NA	0.990585	yes	yes	yes	yes	yes	yes	yes	yes	no	Cnnm1 (+40250)	CNNM1 (+43648)	0.453832	yes	-0.385165	no	0.0862787
chr19	47485944	47486444	mm10_chr19.47485944.47486444	2.54612	1.18e-14	1.21065	1.14251	1.47113	0.232081	0.207825	0.484498	1.96581	1.2189	0.999834	0.855519	1.23853	1.00248	MM10000000005476767	0.997151	NA	0.996184	yes	yes	yes	no	yes	yes	no	yes	no	Sh3pxd2a (-21783)	SH3PXD2A (-12670)	0.069702	yes	0.647298	yes	-0.110054
chr19	47491694	47492194	mm10_chr19.47491694.47492194	3.06118	1.09e-13	1.89857	2.99272	0.623433	1.36776	1.90444	1.99012	1.11867	0.968171	1.54325	2.38	0.0966834	1.53489	MM10000000005476796	0.992517	NA	0.982924	yes	yes	yes	yes	yes	no	no	yes	no	Sh3pxd2a (-27533)	SH3PXD2A (-16627)	0.184958	yes	1.26492	yes	0.0661861
chr19	48070754	48071254	mm10_chr19.48070754.48071254	2.56232	1.55e-11	2.12681	3.38153	0.746864	2.6068	2.45697	3.12815	1.85866	2.41636	1.55229	2.70915	0.48476	2.13349	MM10000000005479692	0.992169	NA	NA	yes	yes	yes	yes	yes	yes	yes	yes	no	Cfap58 (+133292)	SORCS3 (-138729)	0.209098	yes	0.966349	yes	1.08215
chr19	50053604	50054104	mm10_chr19.50053604.50054104	2.80032	2.22e-12	0.830765	1.39316	1.44713	1.37329	1.34275	1.64737	1.81122	1.4922	0.555365	1.12606	0.952237	1.27014	MM10000000005489606	0.963575	NA	NA	yes	yes	yes	yes	yes	yes	yes	yes	no	Rpl13a-ps1 (-23119)	SORCS1 (+698510)	0.319572	no	0.0436175	no	-0.374482
chr19	52207599	52208099	mm10_chr19.52207599.52208099	1.65813	0.000569006	1.00028	1.48428	1.07475	1.39643	1.52422	1.64027	2.55937	0.043048	0.9548	1.28782	1.01819	1.27122	MM10000000005500376	0.691992	NA	NA	yes	yes	yes	yes	yes	no	no	yes	no	Ins1 (-56474)	XPNPEP1 (+992520)	0.114234	yes	1.01254	yes	0.932895
chr19	53748881	53749381	mm10_chr19.53748881.53749381	3.40428	2.61e-08	1.11111	1.84136	0.951185	0.658208	1.11858	0.909412	2.09548	2.44376	0.76787	1.37072	0.675979	1.26761	MM10000000005508082	0.863059	0.995758	0.991245	yes	yes	yes	yes	yes	yes	yes	no	NA	Rbm20 (+71825)	NA	0.049156	no	0.395721	no	0.448818
chr19	54384991	54385491	mm10_chr19.54384991.54385491	2.64368	4.43e-07	1.35339	1.2732	1.12258	1.51408	1.72469	2.20636	2.19382	1.79932	1.11192	1.21657	0.972654	1.49896	MM10000000005511263	0.925176	NA	0.998019	yes	yes	yes	yes	yes	yes	yes	yes	no	Adra2a (+340059)	ADRA2A (+352244)	0.046248	yes	0.341369	no	-0.475873
chr19	54632381	54632881	mm10_chr19.54632381.54632881	1.95156	0.00563172	1.5879	1.85491	0.680636	1.29281	1.41575	0.875075	0.917386	1.65503	0.999961	1.45621	0.473034	1.20079	MM10000000005512500	0.98558	NA	0.990205	yes	yes	yes	yes	no	yes	no	no	NA	Gpam (+466820)	NA	0.016118	no	0.404799	no	0.888849
chr19	56008626	56009126	mm10_chr19.56008626.56009126	2.531	1.92e-06	2.06336	1.49913	0.850589	1.05186	1.14505	0.901981	0.868778	1.25936	1.83395	1.42578	0.498447	1.21803	MM10000000005519381	0.890694	NA	0.995452	yes	yes	yes	no	no	no	no	no	NA	Tcf7l2 (+267066)	NA	0.001262	no	1.23645	no	0.0287189
chr19	56443352	56443852	mm10_chr19.56443352.56443852	1.94909	0.00027113	1.54352	1.04109	1.1047	0.210491	0.524085	0.573833	1.17439	0.528118	1.26741	0.825964	0.836484	0.875462	MM10000000005521555	NA	NA	NA	yes	yes	yes	yes	yes	no	no	yes	no	Plekhs1 (-18038)	PLEKHS1 (-32476)	0.017658	no	1.19491	no	-0.435858
chr2	6377127	6377627	mm10_chr2.6377127.6377627	2.70274	1.21e-09	1.79881	2.56335	1.69699	1.68745	1.71212	1.70499	1.83431	2.16215	1.36314	2.14507	1.16573	1.8031	MM10000000009867364	0.946118	NA	NA	yes	yes	yes	yes	yes	yes	yes	yes	no	Usp6nl (+24644)	USP6NL (-9251)	0.088308	yes	0.357943	yes	1.20122
chr2	6440408	6440908	mm10_chr2.6440408.6440908	3.56687	6.05e-25	1.16359	1.29651	0.656653	1.55189	1.97705	1.53819	1.89272	0.570954	0.950168	1.27653	0.582977	1.22338	MM10000000009867681	0.995002	NA	NA	yes	yes	yes	yes	yes	no	no	yes	no	Usp6nl (+87925)	USP6NL (+68727)	0.3778	no	0.915635	no	0.186697
chr2	6619858	6620358	mm10_chr2.6619858.6620358	2.5461	6.06e-10	0.456956	2.03004	1.51187	1.30605	1.34442	1.77878	1.39316	0.0458234	0.254711	1.64422	1.10694	1.17027	MM10000000009868578	0.96196	NA	NA	yes	yes	yes	yes	yes	no	no	yes	no	Celf2 (+264888)	CELF2 (+234461)	0.569384	no	-0.182152	no	0.8218
chr2	6948017	6948517	mm10_chr2.6948017.6948517	2.78967	2.65e-08	0.383716	1.40971	1.45334	1.85972	2.23131	1.74471	1.97725	2.42895	0.127555	1.07758	1.03642	1.43002	MM10000000009870219	0.949569	NA	0.998271	yes	yes	yes	yes	yes	yes	yes	yes	no	Celf2 (-63271)	CELF2 (-79324)	0.222992	no	0.0630923	yes	0.891536
chr2	10130621	10131121	mm10_chr2.10130621.10131121	2.12233	8.59e-08	1.77539	2.45472	0.776658	1.29458	1.81241	1.63317	1.97773	1.18437	1.10837	2.17843	0.685445	1.53466	MM10000000009886132	0.993396	NA	0.99057	yes	yes	yes	no	yes	yes	no	yes	no	Itih2 (-208)	ITIH2 (-79)	0.23311	no	0.552551	yes	1.50144
chr2	10169939	10170439	mm10_chr2.10169939.10170439	2.48311	2.04e-14	1.79623	3.18921	2.01316	3.67836	3.60864	3.12194	1.79655	0.816317	1.28247	2.4223	1.40745	2.28478	MM10000000009886328	0.995474	NA	0.988957	yes	yes	yes	yes	yes	yes	yes	yes	no	Itih5 (+16618)	ITIH5 (-29333)	0.107198	yes	0.790748	no	0.35665
chr2	10831266	10831766	mm10_chr2.10831266.10831766	2.35687	0.00033955	2.1634	2.88971	1.56326	2.44099	2.61857	2.50803	2.434	0.779047	1.5964	2.29554	1.24773	2.04879	MM10000000009889635	NA	NA	NA	yes	yes	yes	yes	yes	no	no	yes	no	Prkcq (-340592)	PRKCQ (-333926)	-0.080066	no	0.747412	yes	0.700033
chr2	11571104	11571604	mm10_chr2.11571104.11571604	2.6791	1.13e-07	2.4045	3.31011	1.23106	1.38565	1.74299	1.78148	2.84805	3.05373	1.88557	2.61956	1.00414	2.11517	MM10000000009893334	0.995448	NA	0.998926	yes	yes	yes	yes	yes	yes	yes	no	NA	Rbm17 (+31908)	NA	0.105866	yes	1.07249	yes	0.545096
chr2	12827554	12828054	mm10_chr2.12827554.12828054	1.5819	0.00581628	1.33044	1.87342	0.497279	2.64205	2.77074	2.84117	1.25459	0.536782	1.13666	1.6112	0.49343	1.54434	MM10000000009899617	0.415143	0.985528	0.979171	yes	yes	yes	yes	yes	no	no	yes	no	Pter (-96288)	PTER (-142846)	0.570468	yes	0.561639	no	1.4539
chr2	13106444	13106944	mm10_chr2.13106444.13106944	1.61727	0.00692932	1.10883	1.91754	0.80901	0.483571	0.34885	0.911467	2.03197	1.29351	0.754999	1.54243	0.486988	1.06265	MM10000000009901011	0.939894	NA	0.996496	yes	yes	yes	yes	yes	yes	yes	yes	no	C1ql3 (-94888)	C1QL3 (-116355)	0.189712	yes	-0.00612907	no	-0.281453
chr2	16152527	16153027	mm10_chr2.16152527.16153027	2.84159	5.01e-07	0.623517	0.693361	2.04105	1.4738	1.21043	1.25287	2.53673	0.565345	0.576551	0.821736	1.75486	1.23184	MM10000000009916241	0.811162	NA	NA	yes	yes	yes	yes	yes	no	no	yes	no	Plxdc2 (-203527)	PLXDC2 (-199116)	0.095852	no	0.317567	no	0.781932
chr2	17876114	17876614	mm10_chr2.17876114.17876614	1.97602	0.00217306	2.60581	3.12998	2.41266	3.17311	3.761	2.6186	2.16994	2.17895	1.88456	2.47664	1.93497	2.57693	MM10000000009924859	NA	NA	NA	yes	yes	yes	yes	yes	no	no	no	NA	H2al2a (+120594)	NA	0.03579	no	1.11165	no	1.40159
chr2	22123394	22123894	mm10_chr2.22123394.22123894	2.66717	1.01e-07	1.67091	0.974397	2.52489	1.80641	1.69334	1.28009	4.16327	0.639961	0.971108	0.763693	1.89811	1.67147	MM10000000009946096	0.955238	NA	0.996261	yes	yes	yes	yes	yes	no	no	yes	no	Myo3a (-103859)	MYO3A (-72366)	0.138705	no	0.24446	no	0.886951
chr2	23981450	23981950	mm10_chr2.23981450.23981950	2.72648	1.44e-11	0.613771	1.87666	0.742433	1.73298	1.61441	2.43371	1.63963	1.31043	0.341568	1.51896	0.664767	1.31721	MM10000000009955386	0.980546	NA	NA	yes	yes	yes	yes	yes	yes	yes	no	NA	Hnmt (+67694)	NA	0	no	-0.13121	no	1.0188
chr2	28278904	28279404	mm10_chr2.28278904.28279404	2.80291	4.45e-16	1.96536	2.33309	0.0594703	2.73203	2.75245	2.93596	1.00965	0.445641	1.59243	1.98926	0.212607	1.6389	MM10000000009976873	0.998425	NA	NA	yes	yes	yes	yes	yes	yes	yes	yes	no	Olfm1 (+73495)	OLFM1 (+102893)	-0.049672	yes	1.55055	yes	0.861935
chr2	34556074	34556574	mm10_chr2.34556074.34556574	3.01107	4.4e-08	0.807409	2.19437	0.514167	1.09408	1.07968	1.60835	1.46828	0.464978	0.380831	1.73136	0.249198	1.05388	MM10000000010008259	0.961557	NA	NA	yes	yes	yes	yes	yes	no	no	yes	no	Mapkap1 (+149141)	MAPKAP1 (+191087)	0.905266	no	-0.3664	no	-0.460134
chr2	35990187	35990687	mm10_chr2.35990187.35990687	2.71304	6.21e-05	0.8926	1.19821	1.99008	0.136266	0.937613	0.499706	3.37487	0.686115	0.675207	0.795442	1.67483	1.16918	MM10000000010015430	0.890951	NA	NA	yes	yes	yes	yes	yes	yes	yes	yes	no	Ttll11 (-10813)	TTLL11 (-13301)	0.296748	yes	-0.014931	yes	1.13067
chr1	177294941	177295441	mm10_chr1.177294941.177295441	1.89828	0.00332244	1.52168	2.58042	1.5578	1.17195	1.2231	1.59287	2.45764	2.15309	1.08405	2.01561	1.34365	1.70017	MM10000000011632514	0.990457	NA	NA	yes	yes	yes	yes	yes	yes	yes	yes	yes	Akt3 (-36988)	AKT3 (-47547)	0.380402	yes	0.775146	yes	1.95048
chr2	38074433	38074933	mm10_chr2.38074433.38074933	2.2342	8.05e-06	1.14567	1.77682	0.127769	1.37042	1.381	2.09193	0.682438	0.0387184	0.884481	1.41777	0.294076	1.01919	MM10000000010025851	0.884861	NA	NA	yes	yes	yes	yes	yes	no	no	yes	no	Dennd1a (+212692)	DENND1A (+233425)	0.671268	yes	0.00743685	no	0.190937
chr2	44269814	44270314	mm10_chr2.44269814.44270314	2.83613	8.68e-22	0.10856	1.17554	1.97294	1.39574	1.44787	1.42407	1.86439	0.919151	0.173355	0.983586	1.27051	1.15779	MM10000000010056828	0.933165	NA	0.995654	yes	yes	yes	yes	yes	yes	yes	yes	no	Arhgap15 (+521194)	ARHGAP15 (+515277)	0.02396	no	0.11894	no	1.27813
chr2	49730812	49731312	mm10_chr2.49730812.49731312	2.26688	3.77e-06	1.80247	3.33158	0.169156	1.75507	1.95852	2.60793	1.16623	3.75248	1.35963	2.58045	0.00601735	1.86268	MM10000000010084133	0.991623	NA	NA	yes	yes	yes	yes	yes	yes	yes	yes	no	Lypd6b (-56626)	LYPD6B (-56086)	0.1568	yes	1.09512	yes	-0.0619299
chr2	50091567	50092067	mm10_chr2.50091567.50092067	1.94372	5e-05	1.24844	1.93856	2.52329	1.22466	1.2509	1.45383	3.06086	1.3153	0.926395	1.6203	1.89646	1.67809	MM10000000010085937	0.972034	NA	0.998265	yes	yes	yes	yes	yes	no	no	yes	no	Lypd6 (+25353)	LYPD6 (+26516)	0.35005	no	0.0210277	no	0.636135
chr2	50482749	50483249	mm10_chr2.50482749.50483249	1.87016	0.00307232	1.15348	0.610522	2.35244	0.385666	0.379838	0.00482504	3.2012	1.05583	0.834494	0.42285	1.87592	1.1161	MM10000000010087892	NA	NA	0.998219	yes	yes	yes	no	yes	yes	no	no	NA	Mmadhc (-186282)	NA	-0.027574	no	0.715537	yes	2.05879
chr2	50513123	50513623	mm10_chr2.50513123.50513623	2.03467	0.000426384	0.454114	1.85132	1.49712	1.39075	1.64248	2.21718	1.9642	2.85906	0.257472	1.40096	1.25727	1.52654	MM10000000010088044	0.943573	NA	NA	yes	yes	yes	yes	yes	yes	yes	no	NA	Mmadhc (-216656)	NA	0.08915	no	-0.281963	no	0.564374
chr2	52286347	52286847	mm10_chr2.52286347.52286847	1.83277	1.51e-05	1.29365	1.14778	1.27897	1.18395	1.24894	0.691401	2.04461	0.577763	0.878398	1.05909	0.941625	1.12238	MM10000000010096910	0.71681	NA	0.987514	yes	yes	yes	yes	yes	no	no	yes	no	Neb (+52201)	NEB (+62699)	0.326194	no	-0.0318212	yes	-0.379119
chr2	55380066	55380566	mm10_chr2.55380066.55380566	2.91099	2.39e-18	1.31364	1.26423	1.93914	2.30903	2.16492	1.97258	2.79696	1.47705	0.999904	0.837086	1.64301	1.7016	MM10000000010112379	0.997813	NA	NA	yes	yes	yes	yes	yes	yes	yes	yes	no	Kcnj3 (-55654)	KCNJ3 (-28455)	0.730646	yes	0.456952	yes	1.59397
chr2	56492728	56493228	mm10_chr2.56492728.56493228	2.20963	9.18e-07	0.572507	1.858	1.63526	1.48192	1.38804	1.81892	1.33935	1.0573	0.231722	1.3218	1.07882	1.25306	MM10000000010117942	0.854076	NA	NA	yes	yes	yes	yes	yes	yes	yes	yes	no	Nr4a2 (+622060)	NR4A2 (+569869)	0.31351	no	-0.0562481	yes	1.11372
chr2	58904835	58905335	mm10_chr2.58904835.58905335	2.81301	1.54e-23	0.417316	1.2694	2.70494	2.16381	1.94726	1.46376	2.66152	1.96244	0.186818	0.921674	2.12434	1.6203	MM10000000010130003	0.99267	NA	NA	yes	yes	yes	yes	yes	no	no	yes	no	Gm11099 (+45651)	CCDC148 (+238357)	0.395936	yes	0.0453648	yes	1.77043
chr2	58905013	58905513	mm10_chr2.58905013.58905513	2.81301	1.54e-23	1.41654	3.29045	0.811791	2.30804	2.34031	2.15829	0.41309	0.101134	1.1008	2.5674	0.597213	1.55501	MM10000000010130004	0.993431	NA	NA	yes	yes	yes	yes	yes	no	no	yes	no	Gm11099 (+45829)	CCDC148 (+238181)	0.354326	yes	0.496723	yes	0.868536
chr2	58905383	58905883	mm10_chr2.58905383.58905883	2.81301	1.54e-23	1.00605	1.75055	2.50642	0.315031	0.219372	0.55108	1.52545	2.17322	0.685388	1.20361	1.94651	1.26206	MM10000000010130006	0.951872	NA	NA	no	yes	yes	yes	yes	no	no	yes	no	Gm11099 (+46199)	CCDC148 (+237364)	0.04102	yes	0.100255	yes	0.202196
chr2	61337965	61338465	mm10_chr2.61337965.61338465	2.06429	0.000762159	1.26773	1.54498	2.8612	1.67983	2.13999	1.95453	3.94885	0.815521	0.742809	1.02381	2.13065	1.82817	MM10000000010142169	0.922501	NA	NA	no	no	no	no	no	no	no	yes	no	Tank (-240371)	TANK (-256743)	0.172242	no	0.222308	no	1.10192
chr2	61689041	61689541	mm10_chr2.61689041.61689541	1.823	0.000654461	1.19087	0.190568	1.21663	1.66084	1.20972	0.312436	1.22093	1.54554	0.720416	0.0117241	0.970363	0.931822	MM10000000010143924	0.991554	NA	0.996802	yes	yes	yes	no	yes	yes	no	yes	no	Psmd14 (-22403)	PSMD14 (-38723)	0.724316	yes	0.122383	yes	0.447403
chr2	65802598	65803098	mm10_chr2.65802598.65803098	1.98417	0.00480126	1.50499	0.865041	0.982514	1.06773	1.24078	1.26002	2.22387	1.55114	0.976102	0.599951	0.77243	1.18587	MM10000000010164492	0.980759	NA	0.993154	yes	yes	yes	yes	yes	yes	yes	yes	no	Csrnp3 (-42919)	CSRNP3 (-61360)	0.046624	no	0.564919	no	-0.243652
chr2	67805787	67806287	mm10_chr2.67805787.67806287	2.27588	5.07e-12	0.601953	1.81494	1.95937	1.50633	1.75421	1.5374	3.41782	0.516978	0.281867	1.40005	1.43391	1.47498	MM10000000010174508	0.966218	NA	0.997813	yes	yes	yes	yes	yes	no	no	yes	no	B3galt1 (-311676)	B3GALT1 (-315191)	0.347078	yes	-0.26648	yes	1.21974
chr2	68310813	68311313	mm10_chr2.68310813.68311313	2.22118	0.0084213	2.55236	4.27609	0.119854	2.45418	2.90498	3.40855	2.81027	3.37983	1.9676	3.69966	0.398242	2.54287	MM10000000010177033	0.989607	0.999996	NA	yes	yes	yes	yes	yes	yes	yes	yes	no	Stk39 (+161205)	STK39 (+179217)	0.092834	no	0.64372	yes	0.870602
chr2	68376602	68377102	mm10_chr2.68376602.68377102	1.8158	0.000228253	2.4812	2.47498	0.38723	1.36222	1.98281	2.31633	1.16196	2.03472	1.82743	1.91551	0.467153	1.67378	MM10000000010177362	NA	NA	NA	no	no	yes	no	yes	yes	no	yes	no	Stk39 (+95416)	STK39 (+99866)	0.071312	yes	1.03611	yes	1.12277
chr2	68377263	68377763	mm10_chr2.68377263.68377763	1.8158	0.000228253	2.34527	3.48642	1.91133	2.28003	2.65233	2.21183	3.64629	3.56426	1.65199	2.86877	1.59286	2.56467	MM10000000010177365	0.993154	NA	0.991117	no	yes	yes	yes	yes	yes	yes	yes	no	Stk39 (+94755)	STK39 (+98723)	0.075426	yes	0.569445	yes	1.04844
chr2	69348931	69349431	mm10_chr2.69348931.69349431	2.39414	1.39e-09	1.75235	1.74848	2.66689	2.58593	2.77732	2.6959	2.48812	1.49177	1.21926	1.43575	1.94686	2.07351	MM10000000010182223	0.889969	NA	0.999196	yes	yes	yes	yes	yes	yes	yes	yes	no	Abcb11 (-6581)	ABCB11 (-5162)	0.113208	no	0.603518	no	0.619027
chr2	69349162	69349662	mm10_chr2.69349162.69349662	2.39414	1.39e-09	0.243122	2.97304	1.67981	0.935179	1.30339	1.58741	0.371808	3.33488	0.0351835	2.13573	1.22919	1.43898	MM10000000010182225	NA	NA	NA	yes	yes	yes	yes	yes	yes	yes	yes	no	Abcb11 (-6812)	ABCB11 (-5324)	0.103438	no	-0.530571	no	0.741664
chr2	70604725	70605225	mm10_chr2.70604725.70605225	4.5385	4.13e-16	1.00533	1.54465	1.28817	0.830502	1.00634	1.44534	0.673495	1.40914	0.800944	1.35341	0.999203	1.12332	MM10000000010188502	0.978652	NA	NA	yes	yes	yes	yes	yes	yes	yes	no	NA	Gad1 (+42933)	NA	0.067856	no	0.26687	no	0.0850966
chr2	70968308	70968808	mm10_chr2.70968308.70968808	3.50905	2.53e-17	1.81433	3.43151	2.0953	2.52434	3.06209	2.76002	2.93686	1.82398	1.12833	2.51746	1.49194	2.32601	MM10000000010190320	0.936155	NA	0.988197	yes	yes	yes	yes	yes	yes	yes	yes	no	Mettl8 (+87025)	DCAF17 (-107087)	0.138156	yes	0.274784	no	1.26319
chr2	71790592	71791092	mm10_chr2.71790592.71791092	2.61215	9.06e-07	1.0596	1.17508	2.05378	1.33014	2.04763	1.27042	3.21842	0.98351	0.752203	0.983126	1.51175	1.48961	MM10000000010194432	0.995495	NA	NA	yes	yes	yes	yes	yes	yes	yes	yes	no	Itga6 (+3902)	ITGA6 (+3594)	0.272956	no	0.608294	no	-0.247938
chr2	74178047	74178547	mm10_chr2.74178047.74178547	2.25769	6.41e-05	0.749519	1.47215	1.09315	0.390761	0.502527	0.292838	0.808339	0.331823	0.35223	0.950763	0.802229	0.704212	MM10000000010206369	0.564431	NA	0.990697	yes	yes	yes	yes	yes	no	no	yes	no	Atp5g3 (-266972), Lnpk (+400651)	ATP5G3 (-338678)	0.74931	no	0.0789541	no	1.26919
chr2	74459817	74460317	mm10_chr2.74459817.74460317	2.2864	4.91e-05	2.00216	2.51477	1.93818	2.36908	2.47374	2.12953	3.51843	1.24365	1.28193	2.04283	1.65481	2.10628	MM10000000010207778	0.997228	NA	NA	yes	yes	yes	yes	yes	no	no	yes	no	Hoxd10 (-231857), Hoxd11 (-222256), Hoxd12 (-214946), Hoxd13 (-208243), Lnpk (+118881), Evx2 (+199352)	HOXD10 (-255784), HOXD11 (-246491), HOXD12 (-238935), HOXD13 (-232096), LNPK (+141499), EVX2 (+223118)	0.113928	no	-0.202275	no	0.737156
chr2	75913097	75913597	mm10_chr2.75913097.75913597	2.52986	4.95e-06	1.82414	1.10492	2.68084	1.67247	1.71015	1.60189	2.78638	0.0611973	1.50059	0.996505	2.29087	1.65727	MM10000000010215044	0.95972	NA	0.999515	yes	yes	yes	yes	yes	no	no	yes	no	Ttc30b (+25238)	TTC30B (+27072)	0.182992	yes	0.788549	no	0.945784
chr2	76290810	76291310	mm10_chr2.76290810.76291310	3.54835	1.51e-24	0.890139	2.66814	0.37801	0.705939	0.658492	1.6451	0.924314	0.68743	0.479484	1.92876	0.226657	1.0175	MM10000000010216933	0.998596	NA	NA	yes	yes	yes	yes	yes	yes	yes	yes	no	Pde11a (+47714)	PDE11A (+58555)	0.56639	no	-0.043716	no	-0.339829
chr2	76475014	76475514	mm10_chr2.76475014.76475514	2.03678	0.000372409	1.25225	2.59923	1.03498	0.579366	1.14808	1.62896	2.15182	0.368309	0.671572	1.84349	0.830603	1.28261	MM10000000010217854	0.858642	NA	0.996228	yes	yes	yes	no	yes	no	no	yes	no	Osbpl6 (+68726)	OSBPL6 (+57204)	0.320128	no	-0.263655	no	0.102411
chr2	77793912	77794412	mm10_chr2.77793912.77794412	1.6628	0.00704982	0.616397	1.44389	2.13646	1.19635	1.27811	1.01442	2.45446	1.14957	0.449902	1.12235	1.59858	1.31459	MM10000000010224448	0.932935	NA	0.997411	yes	yes	yes	yes	yes	no	no	yes	no	Zfp385b (-74423)	ZNF385B (+20994)	0.331974	no	-0.298249	no	0.44983
chr2	77837784	77838284	mm10_chr2.77837784.77838284	2.07766	8.9e-05	1.40724	1.22426	2.0661	0.262768	0.547176	0.414748	2.05576	1.35294	0.948082	0.981793	1.42299	1.15308	MM10000000010224668	0.847032	NA	0.997354	yes	yes	yes	no	yes	yes	no	yes	no	Cwc22 (+108341)	ZNF385B (-18654)	0.039136	no	0.0777091	no	-0.181237
chr2	79213932	79214432	mm10_chr2.79213932.79214432	1.56367	0.00162061	1.19297	1.14028	1.52737	1.01199	1.18593	0.409674	0.915603	0.156469	0.830389	0.70778	1.09943	0.925262	MM10000000010231548	0.860898	NA	0.998871	yes	yes	yes	no	yes	no	no	yes	no	Itga4 (-41318)	ITGA4 (-49737)	0.118952	no	0.23487	no	-0.0612902
chr2	79518239	79518739	mm10_chr2.79518239.79518739	1.82895	0.00329542	0.114746	0.900241	1.39069	1.18302	0.902616	1.01186	2.44508	0.74225	0.177879	0.516533	1.19954	0.962223	MM10000000010233070	NA	NA	NA	yes	yes	yes	yes	no	yes	no	yes	no	Neurod1 (-61738)	NEUROD1 (-66308)	0.051726	yes	0.717704	yes	0.393796
chr2	79567405	79567905	mm10_chr2.79567405.79567905	2.1379	5.66e-05	2.73023	4.75517	0.873869	2.65888	2.51078	3.22711	1.96587	2.67006	1.79493	3.74461	0.575232	2.50061	MM10000000010233316	0.997279	NA	NA	yes	yes	yes	yes	yes	yes	yes	yes	no	Ssfa2 (-67697)	SSFA2 (-79643)	0.043778	yes	0.704882	yes	1.4273
chr2	79580221	79580721	mm10_chr2.79580221.79580721	2.42942	3.08e-07	0.960871	1.56207	1.09457	1.31867	2.01345	2.07686	1.57408	0.241052	0.755464	1.19336	0.882929	1.24303	MM10000000010233380	0.982734	NA	0.988953	yes	yes	yes	yes	yes	yes	yes	yes	no	Ssfa2 (-54881)	SSFA2 (-60472)	0.096436	no	0.374016	no	0.606374
chr2	80486711	80487211	mm10_chr2.80486711.80487211	2.17997	0.000165449	2.75955	3.10047	0.816774	2.33506	2.52893	3.13655	1.41965	2.45473	2.15403	2.67275	0.601563	2.18001	MM10000000010237912	0.986761	NA	NA	yes	yes	yes	no	yes	no	no	yes	no	Frzb (-39336)	FRZB (-48376)	0.358116	no	1.12927	yes	1.11905
chr2	80486934	80487434	mm10_chr2.80486934.80487434	2.17997	0.000165449	0.697209	0.208969	1.34313	0.087353	0.259723	0.882143	2.24953	0.501986	0.591718	0.150648	1.20383	0.743294	MM10000000010237913	0.896974	NA	NA	no	yes	yes	no	yes	no	no	yes	no	Frzb (-39559)	FRZB (-48601)	0.307692	no	0.160384	yes	1.63344
chr2	80855189	80855689	mm10_chr2.80855189.80855689	1.83554	4.55e-05	0.91267	2.25481	2.73995	0.750518	1.22365	0.816427	2.59116	4.15498	0.783246	1.78616	2.26807	1.84379	MM10000000010239755	0.934307	NA	0.999236	yes	yes	yes	yes	yes	yes	yes	yes	no	Nup35 (+216623)	NUP35 (+233491)	0.020794	no	-0.0128194	yes	0.645179
chr2	81885140	81885640	mm10_chr2.81885140.81885640	2.27094	1.07e-05	1.46592	2.59764	0.523752	2.04197	1.9839	2.37851	1.22554	1.78146	0.728851	2.01729	0.330823	1.55233	MM10000000010244904	0.887851	NA	NA	yes	yes	yes	yes	yes	yes	yes	yes	no	Zfp804a (-167832)	ZNF804A (-154216)	0.489254	no	0.124521	yes	2.13672
chr2	81885314	81885814	mm10_chr2.81885314.81885814	2.27094	1.07e-05	1.08351	0.946324	0.508239	1.42607	1.37049	1.24508	2.20231	0.908424	0.735699	0.790248	0.356192	1.05205	MM10000000010244905	0.948523	0.999529	0.991153	yes	yes	yes	yes	yes	yes	yes	yes	no	Zfp804a (-167658)	ZNF804A (-154028)	0.64743	no	0.0264074	yes	1.0022
chr2	81945692	81946192	mm10_chr2.81945692.81946192	2.36959	1.03e-05	1.05245	1.81314	1.2233	0.534964	1.02437	1.07504	1.28183	0.579324	0.799851	1.27196	1.0224	1.06169	MM10000000010245207	0.817824	NA	0.990118	yes	yes	yes	yes	yes	yes	yes	yes	no	Zfp804a (-107280)	ZNF804A (-109556)	0.066178	no	0.00256884	yes	0.739389
chr2	81945887	81946387	mm10_chr2.81945887.81946387	2.36959	1.03e-05	0.554844	0.58306	0.505507	0.730538	0.485738	0.745981	0.560486	1.27475	0.201957	0.403964	0.591389	0.603474	MM10000000010245208	0.792146	NA	NA	yes	yes	yes	yes	yes	yes	yes	yes	no	Zfp804a (-107085)	ZNF804A (-109402)	-0.084264	no	-0.0188727	yes	1.26948
chr2	84823220	84823720	mm10_chr2.84823220.84823720	2.08257	6.93e-07	0.937228	1.90762	1.24601	0.590304	0.892058	1.55619	0.50624	0.566952	0.876137	1.26366	0.994474	1.03062	MM10000000010259595	0.918493	NA	0.995137	yes	yes	yes	yes	yes	yes	yes	yes	no	Smtnl1 (-818)	TIMM10 (-5843)	0.04281	no	0.743291	no	0.0500323
chr2	85291455	85291955	mm10_chr2.85291455.85291955	1.81551	0.0021649	0.50657	1.76359	2.03692	1.55947	1.47959	1.36589	1.89146	2.54942	0.2279	1.28705	1.6501	1.48345	MM10000000010261936	0.921648	NA	NA	yes	yes	yes	yes	yes	yes	yes	yes	no	Olfr987 (+47610)	LRRC55 (-88136)	-0.019296	no	-0.385059	no	0.629656
chr2	90639893	90640393	mm10_chr2.90639893.90640393	2.42233	2.58e-09	2.22361	2.11924	2.80563	1.25901	1.98577	2.37344	3.53293	0.47122	1.55734	1.5731	1.82504	1.97512	MM10000000010288678	0.997866	NA	0.999707	yes	yes	yes	no	yes	no	no	yes	no	Nup160 (-37072)	PTPRJ (-64556)	0.11796	yes	0.874419	yes	2.22263
chr2	93672649	93673149	mm10_chr2.93672649.93673149	3.14216	3.25e-07	1.76737	1.18269	0.803005	0.367815	0.379396	0.524365	1.08641	0.88091	1.40656	1.06415	0.778782	0.931041	MM10000000010303842	0.967712	NA	NA	yes	yes	yes	yes	yes	yes	yes	yes	no	Alx4 (+30515)	ALX4 (+40261)	0.1848	no	1.27563	no	0.0816979
chr2	94675306	94675806	mm10_chr2.94675306.94675806	2.04486	2.5e-08	0.91336	1.16589	2.85137	0.807312	0.344312	0.479199	3.58559	0.61237	0.685705	0.990206	2.18632	1.32924	MM10000000010308855	NA	NA	NA	no	yes	no	no	yes	no	no	yes	no	Api5 (-237420)	API5 (-248189)	0.004346	no	-0.147577	no	1.32521
chr2	94675821	94676321	mm10_chr2.94675821.94676321	2.04486	2.5e-08	1.67065	1.91415	1.26953	0.547025	0.820292	0.848195	1.2513	0.226187	1.06	1.46222	0.937553	1.09155	MM10000000010308858	0.981674	NA	0.989255	yes	yes	no	no	yes	no	no	yes	no	Api5 (-237935)	API5 (-248738)	0.351162	no	-0.0122895	no	0.297216
chr8	48760803	48761303	mm10_chr8.48760803.48761303	3.24346	8.19e-14	1.26718	2.02329	2.18504	1.57996	1.3288	2.0053	1.80572	2.56673	0.777036	1.44759	1.67219	1.69626	MM10000000012591323	NA	NA	NA	yes	yes	yes	yes	yes	yes	yes	yes	yes	Tenm3 (-86363)	TENM3 (-17074)	0.392552	no	-0.350778	yes	1.3625
chr2	101841765	101842265	mm10_chr2.101841765.101842265	2.66571	4.35e-11	0.609933	0.484978	0.84261	0.375446	0.566946	1.07808	0.919501	0.128356	0.426679	0.554642	0.561097	0.595297	MM10000000010344688	0.830342	NA	0.993952	yes	yes	yes	yes	yes	no	no	no	NA	Commd9 (-44238)	NA	0.06512	yes	0.452028	no	0.762814
chr2	102828333	102828833	mm10_chr2.102828333.102828833	1.97863	0.00271178	1.30322	0.180634	0.93011	1.09521	1.25684	0.380288	1.37744	1.14187	0.926043	0.204163	0.539227	0.84864	MM10000000010349620	0.939971	NA	NA	yes	yes	no	no	no	no	no	yes	no	Cd44 (+73042)	CD44 (+75668)	0.115852	no	0.426027	no	0.485956
chr2	103118753	103119253	mm10_chr2.103118753.103119253	1.92049	3.05e-07	0.872445	0.714218	0.698869	1.12756	0.909946	1.14665	1.37083	1.5652	0.638553	0.581321	0.630354	0.932359	MM10000000010351073	0.978353	NA	NA	no	no	no	no	no	no	no	yes	no	Apip (+45328)	APIP (+62923)	0.035572	no	0.587933	yes	1.07105
chr2	103119387	103119887	mm10_chr2.103119387.103119887	1.92049	3.05e-07	0.854368	1.57363	1.07857	0.528789	0.741489	1.16088	0.978803	0.567529	0.607521	1.16433	0.676799	0.902973	MM10000000010351076	0.759086	NA	NA	yes	yes	yes	yes	yes	no	no	yes	no	Apip (+45962)	APIP (+65103)	0.08391	no	0.149166	yes	-0.0994488
chr2	103804315	103804815	mm10_chr2.103804315.103804815	3.49978	2.29e-17	1.71824	3.6814	1.63475	2.76266	3.26902	3.33531	2.76486	2.82444	1.07618	2.84797	1.13251	2.45885	MM10000000010354500	0.997441	NA	0.981674	yes	yes	yes	yes	yes	yes	yes	yes	no	Caprin1 (-6916)	CAPRIN1 (-15079)	0.526298	no	0.199416	yes	1.82604
chr2	105159458	105159958	mm10_chr2.105159458.105159958	2.0741	7.59e-13	1.38029	1.44888	2.10671	1.06906	1.14538	1.03485	3.73069	2.40326	0.893166	1.20534	1.73732	1.65045	MM10000000010361276	0.993503	NA	0.994262	yes	yes	yes	yes	yes	yes	yes	no	NA	Wt1 (+33179)	NA	-0.076422	yes	0.734022	no	0.961152
chr2	105159729	105160229	mm10_chr2.105159729.105160229	2.0741	7.59e-13	0.24039	1.634	0.141889	1.31951	1.43324	1.41697	1.20139	1.41282	0.317904	1.29746	0.273973	0.971777	MM10000000010361277	0.986203	NA	0.980154	yes	yes	yes	yes	yes	yes	yes	no	NA	Wt1 (+33450)	NA	0.0362	yes	0.543008	no	0.267291
chr2	105244626	105245126	mm10_chr2.105244626.105245126	1.67263	4.34e-05	0.846498	1.50316	0.780838	2.38311	2.31216	2.71999	2.39915	1.17931	0.886915	1.50116	0.622443	1.5577	MM10000000010361702	0.991755	NA	NA	yes	yes	yes	yes	yes	yes	yes	yes	no	Them7 (+20556)	WT1 (+127489)	-0.014834	yes	0.933552	no	-0.71291
chr2	113538916	113539416	mm10_chr2.113538916.113539416	2.43395	6.02e-15	1.92733	2.63723	1.39196	2.09058	2.25597	2.36168	1.22202	0.154141	1.54579	2.27679	1.17267	1.73056	MM10000000010403173	0.996073	NA	0.992531	yes	yes	yes	yes	yes	yes	yes	yes	no	Fmn1 (+211384)	GREM1 (+234272)	0.320602	yes	0.418415	yes	0.838359
chr2	113978160	113978660	mm10_chr2.113978160.113978660	3.20067	7.29e-28	1.2813	1.295	1.60187	1.06941	1.3334	0.765833	2.50062	2.15389	1.00546	1.00624	1.05259	1.3696	MM10000000010405370	0.97134	NA	NA	yes	yes	yes	yes	yes	yes	yes	yes	no	Gjd2 (+35209)	GJD2 (+35140)	0.31038	yes	0.559898	yes	0.668106
chr2	114024432	114024932	mm10_chr2.114024432.114024932	2.40695	3.41e-06	0.535729	2.13776	1.76804	1.18705	1.28766	1.71559	2.28541	3.14901	0.222877	1.68171	1.42716	1.58164	MM10000000010405601	0.663973	NA	NA	no	yes	yes	yes	yes	yes	yes	yes	no	Gjd2 (-11063)	GJD2 (-13468)	0.068394	no	-0.346828	no	-0.111851
chr2	114024822	114025322	mm10_chr2.114024822.114025322	2.40695	3.41e-06	0.925199	2.65045	2.10067	2.73637	2.53206	1.52726	3.38263	3.85989	0.602641	1.99921	1.70283	2.18356	MM10000000010405603	0.99151	NA	NA	yes	yes	yes	yes	yes	yes	yes	yes	no	Gjd2 (-11453)	GJD2 (-13867)	0.169886	no	0.308301	no	0.125994
chr2	115813190	115813690	mm10_chr2.115813190.115813690	1.841	1.54e-05	2.66732	3.26629	1.89655	4.13741	4.0675	3.99393	2.23963	1.13932	1.76289	2.72918	1.16717	2.64247	MM10000000010414545	0.999087	0.999999	NA	yes	yes	yes	yes	yes	yes	yes	yes	no	BC052040 (+231724)	MEIS2 (+258621)	0.690846	yes	0.703809	yes	1.05414
chr2	116983882	116984382	mm10_chr2.116983882.116984382	2.2323	2.85e-06	0.446148	1.35505	1.98664	0.685729	0.348652	1.12353	1.34521	2.31756	0.135471	0.932719	1.77988	1.13242	MM10000000010420398	0.499767	NA	0.986233	yes	yes	yes	yes	yes	yes	yes	yes	no	Tmco5 (+105424)	TMCO5A (+144833)	0.425422	no	-0.288261	no	0.604419
chr2	118283179	118283679	mm10_chr2.118283179.118283679	3.32923	6.28e-18	1.14085	2.55189	0.412933	1.13874	0.770994	2.30928	1.27087	0.498175	0.785671	2.06951	0.0932282	1.18565	MM10000000010426895	0.905807	NA	NA	yes	yes	yes	yes	yes	yes	yes	yes	no	Fsip1 (-26463)	GPR176 (+114190)	0.225292	yes	0.253039	no	0.624118
chr2	118646653	118647153	mm10_chr2.118646653.118647153	2.91833	1.99e-11	2.53847	4.37434	1.68842	3.86541	3.8147	3.97415	3.24244	3.13702	1.91983	3.5124	1.2149	3.02564	MM10000000010428712	0.999903	NA	NA	yes	yes	yes	yes	yes	yes	yes	no	NA	Pak6 (-16400)	NA	0.066838	yes	0.967887	no	0.197163
chr2	120098673	120099173	mm10_chr2.120098673.120099173	2.76035	6.18e-09	0.444381	1.34999	1.84661	0.300298	0.416443	0.33907	2.03732	1.15105	0.402827	0.954526	1.42235	0.969533	MM10000000010435972	0.96604	NA	0.998868	yes	yes	yes	yes	yes	yes	yes	yes	no	Sptbn5 (-41426)	SPTBN5 (-20894)	0.068532	yes	0.449911	yes	0.132408
chr2	122715090	122715590	mm10_chr2.122715090.122715590	2.55375	1.52e-07	1.3432	1.56851	0.733487	2.07068	2.13411	1.95639	1.28451	0.553354	0.954237	1.23892	0.671933	1.31903	MM10000000010449054	0.953216	NA	NA	yes	yes	yes	yes	no	yes	no	no	NA	Slc30a4 (-12701)	NA	0.0884377	yes	0.360677	no	0.698668
chr2	123625521	123626021	mm10_chr2.123625521.123626021	2.33574	1.19e-05	0.349458	1.06595	0.248363	0.179203	0.114294	0.256795	1.10722	0.457718	0.255942	0.707231	0.1339	0.443279	MM10000000010453606	0.749423	NA	NA	yes	yes	yes	yes	yes	yes	yes	no	NA	Sqor (+843772)	NA	0.02299	no	0.487244	no	-0.0682706
chr2	126634629	126635129	mm10_chr2.126634629.126635129	2.19812	0.000642256	1.68366	2.33611	0.967632	1.446	2.09768	2.16305	1.25734	0.979212	1.49157	2.05797	0.533992	1.54675	MM10000000010468652	NA	NA	NA	yes	yes	yes	yes	yes	no	no	yes	no	Hdc (-16201)	HDC (-15594)	0.101794	yes	0.949011	no	-0.253947
chr2	126949794	126950294	mm10_chr2.126949794.126950294	2.78527	2.62e-07	1.45358	1.11807	0.750859	0.133308	0.231055	0.351644	0.0731995	0.186122	1.14479	0.941089	0.45813	0.621986	MM10000000010470228	0.960188	NA	0.997388	yes	yes	yes	no	no	no	no	yes	no	Sppl2a (-16809)	SPPL2A (-15213)	0.293212	yes	0.601344	yes	0.583397
chr2	127894876	127895376	mm10_chr2.127894876.127895376	2.31639	2.68e-09	1.36077	0.904584	0.406339	1.29629	1.1618	1.17439	0.997525	2.75758	1.12405	0.953459	0.229347	1.12419	MM10000000010474953	0.760949	NA	0.983272	yes	yes	yes	yes	yes	yes	yes	yes	no	Acoxl (+40498)	ACOXL (+84066)	0.255134	yes	0.529005	yes	-0.568869
chr2	128104981	128105481	mm10_chr2.128104981.128105481	3.01471	5.27e-11	0.77071	1.8364	1.80439	1.34975	1.7152	1.57719	2.25143	0.622242	0.55208	1.32462	1.28551	1.37177	MM10000000010476004	0.958125	NA	0.998423	yes	yes	yes	yes	yes	no	no	yes	no	Bcl2l11 (-20808)	BCL2L11 (-28593)	0.147644	no	0.317357	no	0.278072
chr2	128744961	128745461	mm10_chr2.128744961.128745461	1.85246	0.00452926	2.07484	2.73773	2.3166	1.93195	2.07245	1.60405	3.39091	2.10262	1.41475	2.07939	1.62959	2.12317	MM10000000010479204	NA	NA	NA	no	yes	yes	no	yes	yes	no	no	NA	Mertk (+46255)	NA	0.018302	no	0.793614	no	0.969157
chr2	131612981	131613481	mm10_chr2.131612981.131613481	2.57516	6.71e-06	1.50996	1.95285	1.65975	1.88626	1.65351	1.73811	2.98138	3.39398	1.13233	1.61861	1.44132	1.90619	MM10000000010493544	0.989554	NA	NA	yes	yes	yes	yes	yes	yes	yes	no	NA	Adra1d (-50948)	NA	0.0587678	no	0.278595	no	0.284489
chr2	131798926	131799426	mm10_chr2.131798926.131799426	2.10781	2.45e-08	0.250376	2.59078	1.53061	0.754097	0.477984	0.620829	2.64394	2.02238	0.190862	1.86936	0.952684	1.26399	MM10000000010494473	NA	NA	NA	no	yes	yes	yes	no	yes	no	yes	no	Erv3 (+60571)	PRNP (-123408)	0.08002	yes	0.0595442	no	1.72741
chr2	132063655	132064155	mm10_chr2.132063655.132064155	1.76495	3.99e-06	2.18731	1.87676	1.30594	2.62434	2.52453	2.57597	2.25078	0.238923	1.76363	1.59745	0.772621	1.79257	MM10000000010495797	0.996728	NA	NA	yes	yes	yes	yes	yes	no	no	no	NA	Rassf2 (-33904)	NA	-0.13826	yes	1.3806	yes	0.35105
chr2	132064135	132064635	mm10_chr2.132064135.132064635	1.76495	3.99e-06	1.30371	0.941067	0.656262	0.0246188	0.302719	0.155811	1.38093	0.577558	1.00539	0.667701	0.396941	0.673883	MM10000000010495799	0.994585	NA	NA	yes	yes	yes	no	yes	no	no	yes	no	Rassf2 (-34384)	RASSF2 (-42962)	0.065436	yes	1.07099	yes	0.359006
chr2	132064415	132064915	mm10_chr2.132064415.132064915	1.76495	3.99e-06	0.55955	0.755175	0.298743	0.172447	0.414513	0.019338	1.43261	1.48064	0.4482	0.495145	0.132706	0.564461	MM10000000010495801	0.979171	NA	NA	yes	yes	yes	no	yes	no	no	yes	no	Rassf2 (-34664)	RASSF2 (-43133)	0.11783	yes	0.100468	yes	-0.641223
chr2	132739819	132740319	mm10_chr2.132739819.132740319	3.424	6.57e-13	1.47257	2.38292	1.43228	0.619653	0.39966	1.15847	1.63235	2.05365	1.06965	1.79027	0.853788	1.35139	MM10000000010499178	0.996667	NA	0.99542	yes	yes	yes	yes	yes	yes	yes	yes	no	Chgb (-41209)	C9orf72 (-137587)	0.0929719	yes	0.821307	yes	0.694258
chr2	132739945	132740445	mm10_chr2.132739945.132740445	3.424	6.57e-13	1.83499	3.62724	1.15957	2.84439	2.53712	2.48277	1.87462	4.36347	1.21743	2.63427	0.732918	2.3008	MM10000000010499178	0.996667	NA	0.99542	yes	yes	yes	yes	yes	yes	yes	yes	no	Chgb (-41083)	C9orf72 (-137524)	0.131287	yes	0.327233	yes	1.21533
chr2	133093173	133093673	mm10_chr2.133093173.133093673	1.92088	0.00175988	1.26543	1.04536	2.41565	1.31247	1.69428	1.43136	2.80237	3.00717	0.964774	0.732218	1.98829	1.69631	MM10000000010500945	0.789126	0.997682	0.988025	yes	yes	yes	yes	yes	yes	yes	yes	no	Fermt1 (-147517)	FERMT1 (-116717)	0.033564	no	0.553394	no	-0.0681418
chr2	133371079	133371579	mm10_chr2.133371079.133371579	2.29437	2.37e-07	1.09553	2.05468	0.131571	1.16533	1.66558	1.94692	0.535343	2.2091	0.596225	1.55687	0.271509	1.20261	MM10000000010502334	0.923165	NA	NA	yes	yes	yes	yes	yes	yes	yes	yes	no	Bmp2 (-180830)	BMP2 (-193631)	0.165748	no	0.1353	no	0.461063
chr2	133483812	133484312	mm10_chr2.133483812.133484312	2.21325	1.77e-11	1.05331	1.04709	1.44288	0.962209	0.844598	1.39641	2.16147	0.141616	0.808484	0.832273	0.941075	1.0574	MM10000000010502898	0.920673	NA	0.991627	yes	yes	yes	yes	yes	yes	yes	yes	no	Bmp2 (-68097)	BMP2 (-74835)	0.573168	yes	0.419443	no	0.589727
chr2	137608445	137608945	mm10_chr2.137608445.137608945	1.78364	0.00113319	1.19518	3.0211	0.533062	2.06606	2.31312	2.42474	1.42491	2.2248	0.833444	2.3788	0.339288	1.70495	MM10000000010523521	0.950251	NA	NA	yes	yes	yes	yes	yes	yes	yes	yes	no	Jag1 (-492051)	JAG1 (-485873)	0.909114	no	0.550679	no	-0.619378
chr2	138150322	138150822	mm10_chr2.138150322.138150822	2.01964	0.000822229	0.354058	0.625724	3.04164	0.258324	0.245523	0.241912	3.39358	0.276277	0.210944	0.478618	2.31758	1.04038	MM10000000010526230	NA	NA	NA	yes	yes	yes	yes	yes	no	no	yes	no	Btbd3 (-127921)	NNT (+101833)	0.050598	no	-0.39009	yes	0.663401
chr2	138150548	138151048	mm10_chr2.138150548.138151048	2.01964	0.000822229	0.540675	1.78725	2.3883	2.04212	2.17844	1.65398	2.91376	2.08409	0.162182	1.29323	1.76537	1.70995	MM10000000010526231	0.797282	NA	0.999819	no	yes	yes	yes	yes	no	no	yes	no	Btbd3 (-127695)	NNT (+102001)	0.043242	no	-0.356375	yes	0.757413
chr2	138174745	138175245	mm10_chr2.138174745.138175245	3.15539	4.91e-25	1.19391	3.09203	1.47055	1.96213	1.75391	1.63427	2.08413	3.05454	0.787061	2.36024	1.12529	1.86528	MM10000000010526352	0.965268	NA	NA	yes	yes	yes	yes	yes	yes	yes	no	NA	Btbd3 (-103498)	NA	0.018534	yes	0.721688	no	0.542029
chr2	138196594	138197094	mm10_chr2.138196594.138197094	1.68267	0.0053214	1.61262	1.32506	3.00819	1.37154	1.46113	1.29592	3.81157	1.23216	1.19262	0.967518	2.39233	1.78824	MM10000000010526462	0.809113	NA	0.999404	yes	yes	yes	yes	yes	yes	yes	no	NA	Btbd3 (-81649)	NA	0.00676553	no	0.361412	yes	2.16107
chr2	139069624	139070124	mm10_chr2.139069624.139070124	2.26927	9.25e-14	0.751231	1.42953	1.1964	0.905967	1.11808	1.83002	1.28661	0.613163	0.627031	1.00425	1.04042	1.07297	MM10000000010530827	0.977086	NA	0.998274	yes	yes	yes	yes	yes	no	no	yes	no	Sptlc3 (-424046)	SPTLC3 (-375984)	-0.101614	yes	0.290234	no	-0.519736
chr2	141822746	141823246	mm10_chr2.141822746.141823246	2.05317	1.94e-09	2.0996	2.70116	1.68805	2.91739	3.24956	2.58024	3.07578	2.96872	1.28539	2.37997	1.14875	2.37224	MM10000000010544592	NA	NA	NA	yes	yes	yes	yes	yes	yes	yes	yes	no	NONE	NONE	0.246756	no	0.416414	no	2.05205
chr2	142244378	142244878	mm10_chr2.142244378.142244878	2.18785	4.16e-06	0.847848	0.903261	1.1251	1.05097	1.00447	0.705514	1.78929	2.59364	0.529212	0.700819	0.748306	1.09077	MM10000000010546701	0.892789	NA	NA	no	yes	yes	yes	yes	no	no	yes	no	Kif16b (+656903)	KIF16B (+650307)	-0.03984	no	0.550616	no	0.0830135
chr2	142244665	142245165	mm10_chr2.142244665.142245165	2.18785	4.16e-06	1.30012	2.25285	0.728672	1.75151	2.00774	1.99838	0.586791	1.13866	0.723638	1.77519	0.462984	1.33878	MM10000000010546702	0.898907	NA	0.994653	yes	yes	yes	yes	yes	no	no	no	NA	Kif16b (+656616)	NA	-0.107984	no	-0.434341	no	0.859768
chr2	142585969	142586469	mm10_chr2.142585969.142586469	2.01114	8.68e-06	2.09298	1.78088	1.27531	1.31048	1.80529	1.51256	0.138486	0.900646	1.43097	1.33853	0.769097	1.30502	MM10000000010548409	0.69153	NA	NA	yes	yes	yes	yes	no	yes	no	yes	no	Kif16b (+315312)	KIF16B (+340708)	0.082578	yes	0.617154	no	0.176616
chr6	29374919	29375419	mm10_chr6.29374919.29375419	2.38998	5.37e-07	0.969788	3.08392	0.645585	2.65542	2.57696	3.62253	1.05659	0.261248	0.818782	2.47387	0.487724	1.69567	MM10000000006891780	0.696592	NA	NA	yes	yes	yes	yes	yes	yes	yes	yes	yes	Opn1sw (+5344)	OPN1SW (+5936)	0.431614	no	-0.218426	no	-1.31199
chr2	143261822	143262322	mm10_chr2.143261822.143262322	3.21771	2.43e-20	1.63503	1.93647	0.925999	1.49325	1.69822	2.2553	0.347606	1.18293	1.02625	1.63484	0.77317	1.35537	MM10000000010551788	0.942419	NA	0.981883	yes	yes	yes	yes	yes	yes	yes	yes	no	Otor (+183599)	PCSK2 (-239250)	0.079634	yes	0.38532	yes	1.37896
chr2	143967312	143967812	mm10_chr2.143967312.143967812	2.51825	5.53e-09	1.46211	2.04295	1.83868	0.555125	1.03235	0.612068	1.79882	2.41016	1.14136	1.55548	1.40642	1.44141	MM10000000010555315	0.940906	NA	NA	no	no	yes	yes	yes	no	no	yes	no	Rrbp1 (+43701)	RRBP1 (+48682)	0.146636	no	0.46232	no	-0.0522053
chr2	143967936	143968436	mm10_chr2.143967936.143968436	2.51825	5.53e-09	1.52738	1.42735	0.391408	0.209031	0.384074	0.902037	1.64161	1.36647	1.19036	1.22503	0.171325	0.948734	MM10000000010555318	0.480064	NA	NA	no	yes	yes	yes	yes	yes	yes	yes	no	Rrbp1 (+43077)	RRBP1 (+46869)	-0.104084	no	0.553658	no	0.66131
chr2	144678833	144679333	mm10_chr2.144678833.144679333	1.93789	2.2e-05	0.844253	1.68059	1.76148	0.371776	0.442094	1.14695	1.82024	1.99999	0.687806	1.36036	1.3393	1.22317	MM10000000010558873	0.998652	NA	NA	yes	yes	yes	yes	yes	no	no	yes	no	Dtd1 (+79186)	DTD1 (+81654)	-0.155392	no	0.415582	yes	0.045079
chr2	144679087	144679587	mm10_chr2.144679087.144679587	1.93789	2.2e-05	2.30235	3.90791	1.60176	3.79755	3.76353	3.19855	2.77817	1.79995	1.69573	2.93361	1.26379	2.64026	MM10000000010558874	0.999955	1	0.995845	yes	yes	yes	yes	yes	no	no	yes	no	Dtd1 (+79440)	DTD1 (+81922)	-0.159474	no	1.00607	yes	1.12474
chr2	145804756	145805256	mm10_chr2.145804756.145805256	2.12061	0.00103766	0.324814	1.18872	1.89972	0.708298	0.831676	0.875573	1.72536	2.70016	0.109888	0.88833	1.42391	1.1524	MM10000000010564503	0.973905	NA	0.995649	yes	yes	yes	yes	yes	yes	yes	yes	no	Rin2 (+18890)	RIN2 (+27322)	-0.08581	no	-0.0466657	no	0.561973
chr2	146446340	146446840	mm10_chr2.146446340.146446840	1.74072	0.00746969	0.949775	1.31862	3.35841	0.951966	1.18226	1.66259	3.72789	3.62576	0.671842	1.07505	2.46709	1.9083	MM10000000010567710	0.87636	NA	NA	yes	yes	yes	no	yes	yes	no	yes	no	Ralgapa2 (+65414)	RALGAPA2 (+77835)	0.034532	no	0.720405	yes	0.893733
chr2	146945515	146946015	mm10_chr2.146945515.146946015	1.97651	0.0045693	0.170253	0.54119	2.42597	0.405539	0.200384	0.50747	2.00046	1.63152	0.311971	0.407892	1.78937	0.944729	MM10000000010570206	0.947587	NA	NA	yes	yes	yes	yes	no	no	no	yes	no	Xrn2 (-67231)	XRN2 (-84881)	0.141261	no	0.248436	yes	0.917366
chr2	147942785	147943285	mm10_chr2.147942785.147943285	2.05789	4.49e-05	0.324032	0.625274	0.776689	0.967585	0.834081	1.10283	0.980554	0.376762	0.0532675	0.407735	0.671631	0.647313	MM10000000010575193	0.955775	NA	0.987131	yes	yes	yes	yes	yes	yes	yes	yes	no	Foxa2 (+102913)	FOXA2 (+122197)	-0.034752	no	-0.28704	no	0.0997565
chr2	148391343	148391843	mm10_chr2.148391343.148391843	2.93767	2.98e-21	2.59078	3.30385	2.00902	2.34063	2.49556	3.35446	3.35614	1.20487	2.04407	2.83591	1.75518	2.48095	MM10000000010577435	0.991151	NA	0.999324	yes	yes	yes	yes	yes	yes	yes	yes	no	Sstr4 (-3751)	SSTR4 (-3123)	0.054956	yes	1.10716	yes	1.09325
chr2	148483788	148484288	mm10_chr2.148483788.148484288	1.67458	0.00324065	0.345495	0.604085	1.1352	0.13567	0.600761	0.102675	1.79189	0.737376	0.324826	0.330889	0.868	0.634261	MM10000000010577898	0.844543	NA	NA	yes	yes	yes	yes	yes	no	no	no	NA	Cd93 (-40475)	NA	0.005924	no	0.250553	no	0.243055
chr2	150802370	150802870	mm10_chr2.150802370.150802870	2.8492	2.29e-10	1.86704	3.06363	2.96537	3.17569	3.49339	2.80403	3.9912	2.58763	1.42209	2.54531	2.36827	2.75306	MM10000000010589491	0.982887	0.999541	0.999014	yes	yes	yes	yes	yes	yes	yes	no	NA	Pygb (+15885)	NA	-0.019008	yes	0.678326	yes	1.12451
chr2	152087732	152088232	mm10_chr2.152087732.152088232	2.23577	4.46e-05	1.06237	1.41143	0.930152	0.56734	1.03712	0.931173	1.04238	1.40531	0.847761	1.23414	0.644563	1.01034	MM10000000010595917	0.972674	NA	NA	yes	yes	yes	yes	yes	yes	yes	yes	no	Scrt2 (+6453)	SCRT2 (+7131)	-0.07679	no	0.566941	no	-0.82584
chr2	157536968	157537468	mm10_chr2.157536968.157537468	2.85258	2.42e-12	1.06403	1.94284	0.770325	1.19779	1.01805	2.63125	0.705376	0.553807	0.753482	1.62592	0.632831	1.17234	MM10000000010623164	0.724175	NA	0.982857	yes	yes	yes	yes	yes	no	no	yes	no	Nnat (-22912)	NNAT (-30503)	0.258262	no	0.310509	yes	0.749218
chr2	158949155	158949655	mm10_chr2.158949155.158949655	3.01672	2.74e-09	2.48193	2.72387	1.23812	1.50559	1.78897	1.57514	1.14039	2.95095	1.81113	2.24803	1.08643	1.86823	MM10000000010630225	0.998633	NA	NA	yes	yes	yes	yes	yes	yes	yes	yes	no	Dhx35 (+154598)	DHX35 (+180188)	0.619488	yes	1.33975	yes	0.300128
chr2	160070423	160070923	mm10_chr2.160070423.160070923	2.09998	0.00342228	1.77046	1.00514	1.02682	0.570185	0.375195	0.86322	1.65066	0.0547976	1.24631	0.932783	0.873788	0.942669	MM10000000010635831	0.401912	NA	NA	yes	yes	yes	yes	yes	no	no	yes	no	Gm826 (+256821)	MAFB (+348955)	0.462738	no	0.511877	no	0.70035
chr2	161152129	161152629	mm10_chr2.161152129.161152629	2.99018	6.31e-06	1.65813	2.2667	1.69579	2.5184	2.7394	2.6884	2.13667	1.34821	1.15906	1.9172	1.24069	1.9426	MM10000000010641239	0.999341	NA	NA	yes	yes	yes	yes	yes	yes	yes	no	NA	Chd6 (-43357)	NA	0.238301	no	0.206935	no	1.56073
chr2	161930814	161931314	mm10_chr2.161930814.161931314	2.63505	5.04e-08	1.17312	2.92537	1.14164	0.969349	1.47383	1.92824	2.08588	0.537788	0.768851	2.10945	0.819044	1.44841	MM10000000010645133	0.787188	NA	NA	yes	yes	yes	yes	yes	yes	yes	yes	no	Ptprt (+730083)	PTPRT (+713951)	0.260432	yes	0.0822134	yes	1.81273
chr2	162159761	162160261	mm10_chr2.162159761.162160261	3.04355	1.78e-17	1.73191	2.65682	2.16133	2.37021	2.67607	2.32648	3.32573	2.39703	1.30771	2.19665	1.68968	2.25815	MM10000000010646278	0.980177	NA	0.993745	yes	yes	yes	yes	yes	yes	yes	yes	no	Ptprt (+501136)	PTPRT (+502332)	0.197036	no	0.563124	yes	1.21822
chr2	162704649	162705149	mm10_chr2.162704649.162705149	1.83669	0.00943829	1.62569	1.67415	1.1395	1.70095	1.5318	1.51762	1.36945	1.03428	1.36371	1.37953	0.699141	1.36689	MM10000000010649002	0.996181	NA	0.994289	yes	yes	yes	yes	yes	yes	yes	yes	no	Ptprt (-43752)	PTPRT (-42160)	0.618406	no	1.28107	yes	1.46609
chr2	168245224	168245724	mm10_chr2.168245224.168245724	2.84494	2.65e-09	1.65112	4.27167	1.54591	0.0206049	0.517762	0.483096	3.07992	4.07775	0.953756	3.15112	0.959249	1.88291	MM10000000010676705	0.999806	NA	NA	no	yes	yes	yes	yes	no	no	no	NA	Mocs3 (+14852)	NA	0.004156	yes	0.368113	yes	0.524961
chr2	168245503	168246003	mm10_chr2.168245503.168246003	2.84494	2.65e-09	2.15641	2.95369	1.19423	1.80245	1.92479	2.53123	0.723841	1.15479	1.54188	2.35051	0.820796	1.74133	MM10000000010676706	0.999902	NA	0.996526	yes	yes	yes	yes	yes	no	no	no	NA	Mocs3 (+15131)	NA	0.0508996	yes	0.64982	yes	0.432412
chr2	168392650	168393150	mm10_chr2.168392650.168393150	3.01203	8.71e-12	1.69185	2.08704	0.50536	1.63106	1.95254	1.60932	2.20762	2.31789	1.286	1.58443	0.277934	1.55919	MM10000000010677442	0.998944	NA	0.985764	yes	yes	yes	no	yes	no	no	no	NA	Kcng1 (-111768)	NA	0.103607	no	0.634762	no	0.126224
chr2	169700296	169700796	mm10_chr2.169700296.169700796	2.19183	3.9e-08	0.884792	0.297929	0.734341	0.0666393	0.526238	0.488624	0.00840986	0.370097	0.760439	0.179578	0.366259	0.425759	MM10000000010683980	0.974443	NA	NA	yes	yes	yes	yes	yes	yes	yes	yes	no	Tshz2 (+66870)	TSHZ2 (+74189)	0.141628	yes	0.61382	yes	0.0397288
chr2	172338115	172338615	mm10_chr2.172338115.172338615	1.83261	0.000430737	2.06371	1.9123	1.75839	0.123679	0.638047	0.731504	1.39442	0.823669	1.48861	1.30646	1.23068	1.22468	MM10000000010697169	0.971373	NA	0.992835	yes	yes	yes	yes	no	no	no	yes	no	Fam210b (-7200)	FAM210B (-6518)	0.133792	yes	0.844517	yes	0.44413
chr2	172477310	172477810	mm10_chr2.172477310.172477810	2.116	8.34e-05	0.757366	1.24191	1.97844	0.978539	0.687931	0.638819	1.88388	2.30119	0.614115	1.10631	1.57828	1.25153	MM10000000010697865	0.871362	NA	NA	yes	yes	yes	yes	yes	yes	yes	no	NA	Fam209 (+5040)	NA	0.0332681	yes	0.176448	yes	-0.230785
chr2	173436053	173436553	mm10_chr2.173436053.173436553	2.26277	1.08e-10	1.98444	1.40544	0.911507	1.55749	2.2349	1.22242	1.94277	0.201279	1.38735	1.22788	0.59929	1.33407	MM10000000010702659	0.984804	NA	0.996968	yes	yes	yes	yes	yes	no	no	no	NA	1700021F07Rik (-86283)	NA	0.027738	yes	0.697629	no	0.5725
chr2	173774501	173775001	mm10_chr2.173774501.173775001	2.37127	2.27e-07	1.22984	2.14234	1.61353	0.0471723	0.498344	0.718766	1.87429	3.03358	0.860438	1.59884	1.28492	1.35473	MM10000000010704351	0.883215	NA	NA	no	no	no	no	no	no	no	yes	no	Vapb (+37240)	VAPB (+50154)	0.161422	no	0.0895045	no	1.15719
chr2	173775037	173775537	mm10_chr2.173775037.173775537	2.37127	2.27e-07	1.36867	3.25753	1.47158	1.20692	1.65788	1.94676	1.02048	1.02289	0.956801	2.57589	1.07141	1.59607	MM10000000010704354	0.992252	NA	0.984654	yes	yes	yes	yes	yes	yes	yes	yes	no	Vapb (+37776)	VAPB (+50796)	-0.06727	no	0.0132577	no	0.0496278
chr2	174421045	174421545	mm10_chr2.174421045.174421545	2.22623	4.85e-08	1.91889	2.85402	1.04535	1.50788	1.91088	2.1125	1.28134	0.218098	1.38545	2.21832	0.387194	1.5309	MM10000000010707584	0.993486	NA	0.993246	yes	yes	yes	yes	yes	yes	yes	yes	no	Nelfcd (+5491)	NELFCD (+6051)	0.054258	yes	0.507505	no	0.00861287
chr2	174733789	174734289	mm10_chr2.174733789.174734289	2.10098	0.000366683	0.973231	0.695529	2.8885	0.239025	0.850579	0.927181	3.40745	0.308972	0.797957	0.514406	2.03039	1.23938	MM10000000010709148	0.995734	NA	NA	no	yes	yes	yes	yes	no	no	yes	no	Edn3 (-26580)	EDN3 (-23344)	0.103114	no	0.53311	no	-0.831984
chr2	174734013	174734513	mm10_chr2.174734013.174734513	2.10098	0.000366683	2.33409	3.21887	1.49467	2.1102	2.77401	2.91102	1.91365	0.392084	1.70608	2.61673	1.25783	2.06629	MM10000000010709149	0.994794	NA	NA	yes	yes	yes	yes	yes	no	no	yes	no	Edn3 (-26356)	EDN3 (-23108)	0.222214	no	0.480161	no	0.946386
chr2	180843552	180844052	mm10_chr2.180843552.180844052	3.20057	6.99e-14	2.38483	4.0767	0.578986	2.50612	2.4611	3.23576	2.41201	2.40082	1.70656	3.19239	0.610621	2.32417	MM10000000010739697	0.979592	NA	0.992583	yes	yes	yes	yes	yes	yes	yes	yes	no	Bhlhe23 (-66902)	YTHDF1 (+102043)	0.127358	yes	0.669958	yes	0.838871
chr3	8413340	8413840	mm10_chr3.8413340.8413840	2.25001	0.00152431	0.999669	2.31432	1.34917	1.65087	1.39449	0.88946	2.17541	4.38076	0.77746	1.53208	0.898553	1.66929	MM10000000009077352	0.945119	NA	0.999177	yes	yes	yes	yes	yes	yes	yes	yes	no	Stmn2 (-95770)	STMN2 (-106433)	0.098516	no	0.157879	no	1.24851
chr3	9880579	9881079	mm10_chr3.9880579.9881079	2.23468	3.09e-05	0.105144	0.795207	1.66105	1.01636	1.11473	0.953724	2.21589	0.507147	0.0929057	0.383673	1.35809	0.927629	MM10000000009084689	0.85393	NA	NA	yes	yes	yes	yes	yes	no	no	yes	no	Pag1 (-47150)	PAG1 (-38994)	0.026956	no	-0.285754	no	2.37975
chr3	14978765	14979265	mm10_chr3.14978765.14979265	2.78782	2.82e-26	1.30446	2.90974	1.32381	2.13568	2.1903	2.28599	1.73641	1.76365	0.999821	2.11487	1.13403	1.80898	MM10000000009110180	0.954401	NA	0.999962	yes	yes	yes	yes	yes	yes	yes	yes	no	Car2 (+92587)	CA2 (+99035)	-0.017806	no	0.338952	no	1.14991
chr3	16811102	16811602	mm10_chr3.16811102.16811602	1.9334	1.73e-07	1.71493	1.75102	0.721864	2.09375	2.54089	2.64398	2.21763	0.737613	1.30866	1.51248	0.385646	1.60259	MM10000000009119341	0.939747	NA	0.991027	yes	yes	yes	yes	yes	yes	yes	yes	no	Ythdf3 (+628116)	YTHDF3 (+429111)	0.556822	yes	1.13134	yes	-0.602007
chr3	22047166	22047666	mm10_chr3.22047166.22047666	2.25653	3.07e-05	1.73681	2.12094	0.897262	1.21434	1.6061	1.20326	1.36982	1.44362	1.28967	1.6463	0.623666	1.37744	MM10000000009145522	0.81587	0.999704	0.999491	yes	yes	yes	yes	yes	yes	yes	yes	no	Tbl1xr1 (-29236)	TBL1XR1 (-37951)	0.0197396	no	0.834337	no	-0.513944
chr3	27009439	27009939	mm10_chr3.27009439.27009939	2.61253	1.66e-07	0.827943	1.98342	0.922421	0.761258	1.1445	1.55979	0.67055	2.37745	0.606933	1.54288	0.670315	1.18795	MM10000000009170333	0.99487	NA	NA	yes	yes	yes	yes	yes	yes	yes	no	NA	Ect2 (+144172)	NA	0	no	0.139482	no	-0.241524
chr3	27670330	27670830	mm10_chr3.27670330.27670830	1.88756	0.000857229	1.12675	2.67736	1.37246	0.891886	1.08356	1.944	1.96005	1.57259	0.999771	2.1009	1.18982	1.5381	MM10000000009173637	0.896815	NA	0.989678	yes	yes	yes	yes	yes	no	no	yes	no	Fndc3b (+39818)	FNDC3B (+41990)	0.572908	no	0.666757	yes	0.139594
chr3	32107933	32108433	mm10_chr3.32107933.32108433	2.8203	2.02e-06	1.33966	1.14961	1.31446	1.15138	1.283	1.57331	1.1198	1.79137	0.999777	0.934312	1.09485	1.25014	MM10000000009195825	0.850294	NA	NA	yes	yes	yes	yes	yes	yes	yes	yes	no	Kcnmb2 (+205480)	KCNMB2 (+190990)	0.332085	no	0.167958	no	1.7183
chr3	32664166	32664666	mm10_chr3.32664166.32664666	2.05152	0.000168153	0.643339	0.239907	2.49874	0.583415	0.836739	0.655723	2.88597	2.07606	0.554728	0.288583	1.86693	1.19365	MM10000000009198607	0.873849	NA	0.999365	yes	yes	yes	yes	yes	yes	yes	yes	no	Actl6a (-44091)	ACTL6A (-50407)	0.409998	no	0.171006	no	0.655506
chr3	32664336	32664836	mm10_chr3.32664336.32664836	2.05152	0.000168153	0.999636	0.419473	1.25697	0.256605	0.374648	0.485835	1.34898	1.21655	0.73977	0.364536	0.894221	0.759748	MM10000000009198607	0.873849	NA	0.999365	yes	yes	yes	yes	yes	yes	yes	yes	no	Actl6a (-43921)	ACTL6A (-50273)	0.390232	no	0.193858	no	0.100141
chr3	32924405	32924905	mm10_chr3.32924405.32924905	2.81214	1.96e-22	2.08733	2.76256	0.412397	1.55809	1.24903	1.61523	2.29432	0.294223	1.47334	2.38729	0.363921	1.49979	MM10000000009199908	0.994208	NA	NA	yes	yes	yes	yes	yes	no	no	yes	no	Usp13 (+107109)	USP13 (+119871)	0.01022	yes	0.813156	yes	1.33809
chr3	33309311	33309811	mm10_chr3.33309311.33309811	1.83869	0.00258605	1.2948	2.15263	1.00032	1.46144	1.78768	1.29926	2.01905	0.393801	0.999778	1.51894	0.82952	1.34157	MM10000000009201832	0.898349	NA	NA	yes	yes	yes	yes	yes	yes	yes	yes	no	Pex5l (-226501)	PEX5L (-158306)	0.021416	yes	0.655805	no	0.424712
chr3	34426872	34427372	mm10_chr3.34426872.34427372	2.26347	7.59e-06	2.32674	2.4275	1.38917	1.35725	1.51419	2.26282	2.25073	0.759607	1.75671	1.80267	1.0832	1.72096	MM10000000009207420	0.967876	NA	0.995224	yes	yes	yes	yes	yes	yes	yes	yes	no	Sox2 (-223283)	SOX2 (-275941)	0.053802	yes	1.33593	no	0.447281
chr3	36342332	36342832	mm10_chr3.36342332.36342832	2.35156	6.68e-09	1.7135	2.29976	1.00546	0.813291	0.998191	1.25927	2.25982	0.914573	1.23122	1.82024	0.733351	1.36806	MM10000000009216997	0.973354	NA	0.991255	yes	yes	yes	yes	yes	yes	yes	no	NA	Qrfpr (-120269)	NA	0.038282	no	0.818933	no	0.39903
chr3	38281595	38282095	mm10_chr3.38281595.38282095	2.91556	2.67e-17	1.1857	0.622156	1.02604	0.804066	1.12117	0.759094	1.73737	0.750282	1.00011	0.607867	0.916045	0.957264	MM10000000009226694	0.960732	NA	0.999791	yes	yes	yes	yes	yes	yes	yes	yes	no	Ankrd50 (+202999)	ANKRD50 (+261586)	0.028338	yes	0.557294	yes	0.320546
chr3	38553934	38554434	mm10_chr3.38553934.38554434	2.56781	1.11e-13	1.1903	3.33373	0.319914	2.03931	1.91301	2.57884	0.489364	2.80658	0.999882	2.62348	0.0893322	1.67125	MM10000000009228055	0.986228	NA	NA	yes	yes	yes	yes	yes	yes	yes	yes	no	Ankrd50 (-69340)	ANKRD50 (-77904)	0.27037	yes	0.176934	no	0.338205
chr3	38836593	38837093	mm10_chr3.38836593.38837093	2.50136	1.81e-09	1.55937	2.3142	1.01845	0.487568	0.838206	1.26043	1.30477	1.21073	1.11976	1.74865	0.740399	1.23659	MM10000000009229469	0.973966	NA	NA	no	no	no	no	no	no	no	no	NA	Fat4 (-50097)	NA	0.074064	yes	-0.0484556	yes	-0.322819
chr3	50944302	50944802	mm10_chr3.50944302.50944802	2.51505	6.19e-07	1.39491	1.73365	1.79124	0.331575	0.973751	0.527514	1.543	1.61158	1.00016	1.35351	1.35468	1.23778	MM10000000009290007	0.838912	NA	0.997175	yes	yes	yes	yes	yes	no	no	yes	no	Noct (-279895)	NOCT (-304290)	0.363364	no	-0.17196	no	0.383579
chr3	50944443	50944943	mm10_chr3.50944443.50944943	2.51505	6.19e-07	1.19549	1.29454	1.74186	0.473849	0.462809	0.300267	1.42002	0.833839	0.797834	1.00245	1.24534	0.978936	MM10000000009290008	0.960882	NA	0.998237	yes	yes	yes	yes	yes	no	no	yes	no	Noct (-279754)	NOCT (-304197)	0.127516	no	0.150338	no	0.645281
chr3	51969414	51969914	mm10_chr3.51969414.51969914	2.25903	5.62e-07	1.75218	2.21478	1.71775	0.729653	0.99552	1.05132	2.00178	2.02545	1.37063	1.65652	1.41221	1.53889	MM10000000009295133	0.96328	NA	0.989726	yes	yes	yes	yes	yes	yes	yes	yes	no	Maml3 (+135412)	MAML3 (+144790)	0.05652	yes	0.788138	yes	0.70714
chr3	53392382	53392882	mm10_chr3.53392382.53392882	1.76312	0.00483221	1.87217	1.90932	2.89816	1.81845	1.87802	1.64044	3.74954	2.44401	1.33414	1.46593	2.51476	2.13863	MM10000000009302248	0.977688	NA	0.998918	yes	yes	yes	yes	yes	no	no	yes	no	Nhlrc3 (+70700)	NHLRC3 (+89225)	0.139448	yes	0.238313	yes	1.76178
chr3	54037154	54037654	mm10_chr3.54037154.54037654	2.67237	2e-12	0.74775	0.32693	0.968086	0.383137	0.331847	0.645594	0.759414	0.0548397	0.484651	0.354511	0.908893	0.542332	MM10000000009305472	0.258667	NA	0.995736	yes	yes	yes	yes	yes	no	no	yes	no	Trpc4 (-118653)	TRPC4 (-227407)	0.21268	no	0.00492047	no	0.524217
chr3	54877731	54878231	mm10_chr3.54877731.54878231	2.45159	1.19e-08	1.91629	1.55774	1.38883	1.29167	1.00865	1.49249	1.70387	1.32724	1.42196	1.19923	1.42062	1.42987	MM10000000009309674	0.845187	0.990971	0.993437	yes	yes	yes	yes	no	yes	no	yes	no	Sertm1 (+37906)	SERTM1 (+44007)	0.5198	yes	0.737016	no	0.638678
chr3	54877915	54878415	mm10_chr3.54877915.54878415	2.45159	1.19e-08	0.595436	1.5808	1.24426	0.11859	0.276029	0.675067	0.361309	0.900509	0.492372	1.15669	0.882045	0.75301	MM10000000009309675	0.950847	NA	NA	yes	yes	yes	yes	no	yes	no	yes	no	Sertm1 (+37722)	SERTM1 (+43811)	0.50924	yes	-0.0787328	no	1.50507
chr3	55546225	55546725	mm10_chr3.55546225.55546725	2.78654	1.66e-09	0.999912	1.42331	0.954666	1.23775	1.207	1.19194	0.568553	2.93478	0.914615	1.15863	0.478283	1.18813	MM10000000009313017	0.948734	NA	NA	yes	yes	yes	yes	yes	yes	yes	yes	no	Mab21l1 (-236035)	MAB21L1 (-282183)	0.028412	yes	0.597087	no	-0.101074
chr3	56222557	56223057	mm10_chr3.56222557.56223057	2.6514	4.86e-13	1.30604	1.58821	0.977863	2.07301	2.66947	2.39071	1.6989	2.08526	1.09073	1.46594	0.73451	1.64369	MM10000000009316399	0.950213	NA	NA	yes	yes	yes	yes	yes	yes	yes	yes	no	Nbea (-39106)	NBEA (-40544)	0.229416	yes	0.753371	yes	-0.303728
chr3	56331153	56331653	mm10_chr3.56331153.56331653	1.98748	0.00054131	0.945858	0.677487	0.124098	0.39	0.243208	0.554177	0.607588	0.556802	0.748109	0.731516	0.200036	0.525353	MM10000000009316942	NA	NA	NA	yes	yes	yes	yes	yes	yes	yes	yes	no	Nbea (-147702)	NBEA (-166154)	0.51005	yes	0.475243	yes	1.20331
chr3	56489080	56489580	mm10_chr3.56489080.56489580	2.73638	1.56e-15	2.21265	2.5984	1.97198	3.17058	3.25097	2.49842	2.86105	0.853762	1.64856	1.94846	1.34464	2.2145	MM10000000009317731	0.999028	NA	0.998633	yes	yes	yes	yes	yes	yes	yes	no	NA	Nbea (-305629)	NA	0.053722	yes	1.19745	no	0.281399
chr3	58245238	58245738	mm10_chr3.58245238.58245738	2.31317	3.69e-14	1.36285	2.88021	0.475932	1.95581	2.31038	1.86718	1.38576	1.64484	1.01743	2.12491	0.131674	1.55973	MM10000000009326512	0.992356	0.998299	NA	yes	yes	yes	yes	yes	yes	yes	yes	no	Tsc22d2 (-169227)	TSC22D2 (-130998)	0.153838	yes	0.48875	no	0.0395447
chr3	58658209	58658709	mm10_chr3.58658209.58658709	2.14111	1.49e-06	1.16404	1.90979	0.442591	2.63944	2.58897	2.32183	0.692353	1.45929	0.957414	1.63238	0.19661	1.45497	MM10000000009328577	0.98426	NA	NA	yes	yes	yes	yes	yes	yes	yes	yes	no	Erich6 (-21252)	SIAH2 (+40429)	0.465388	no	0.00861109	no	-0.0723475
chr3	63379826	63380326	mm10_chr3.63379826.63380326	1.85982	0.000427277	1.45168	0.984566	1.27668	1.78982	1.68762	2.13772	1.25568	1.09711	0.999989	1.02041	1.00084	1.33656	MM10000000009352185	0.81533	NA	0.988775	yes	yes	yes	yes	yes	no	no	yes	no	Mme (+84204)	MME (+100599)	0.235332	yes	-0.147695	no	-0.0375721
chr3	63380003	63380503	mm10_chr3.63380003.63380503	1.85982	0.000427277	0.888548	1.35756	0.770676	1.29614	1.48015	2.01449	0.622636	1.33739	0.670477	1.19698	0.464591	1.09997	MM10000000009352186	0.887271	NA	0.992093	no	yes	yes	yes	yes	no	no	yes	no	Mme (+84381)	MME (+100766)	0.217608	yes	-0.456186	no	-1.19282
chr3	63598830	63599330	mm10_chr3.63598830.63599330	2.36445	9.72e-17	0.869539	1.92114	0.470868	0.975131	0.777153	1.3874	0.556657	2.32247	0.857549	1.72761	0.384312	1.11362	MM10000000009353280	0.810702	NA	NA	yes	yes	yes	yes	yes	yes	yes	yes	no	Gm34302 (-115201)	ENSG00000240045 (-111280)	0.241314	yes	0.336104	yes	0.451507
chr3	64878521	64879021	mm10_chr3.64878521.64879021	2.07597	2.75e-08	1.48501	2.77744	1.83237	1.93251	1.79894	2.27957	1.12701	1.74686	1.04494	2.27104	1.39787	1.79032	MM10000000009359678	0.968896	NA	NA	yes	yes	yes	yes	yes	yes	yes	yes	no	Vmn2r7 (-159169)	KCNAB1 (-105304)	0.138024	yes	0.400092	yes	0.58953
chr3	65145606	65146106	mm10_chr3.65145606.65146106	1.98818	0.000282657	1.13277	0.488655	0.431938	0.76004	0.527891	0.663338	1.01519	1.74345	0.937437	0.470176	0.404461	0.779577	MM10000000009361014	0.904196	NA	NA	yes	yes	yes	yes	yes	yes	yes	yes	no	Kcnab1 (+36472)	KCNAB1 (+203668)	0.197822	no	0.236746	yes	1.36532
chr3	67482377	67482877	mm10_chr3.67482377.67482877	1.73997	0.00817165	1.21673	1.8164	1.69226	1.8798	2.37514	1.67686	2.29329	1.40452	1.00002	1.50984	1.20649	1.64285	MM10000000009372698	0.992637	0.999665	NA	yes	yes	yes	yes	yes	yes	yes	no	NA	Lxn (-18701)	NA	0.013878	no	0.606422	no	-0.276546
chr3	69501865	69502365	mm10_chr3.69501865.69502365	1.85748	4.16e-06	1.66414	2.46175	0.903442	1.69833	1.45304	1.60157	1.03364	1.72997	1.39225	2.08347	0.758034	1.52542	MM10000000009382795	0.984297	NA	NA	yes	yes	yes	yes	yes	yes	yes	yes	no	B3galnt1 (+96845)	B3GALNT1 (+136431)	0.090766	yes	0.895744	yes	-0.453492
chr3	69503684	69504184	mm10_chr3.69503684.69504184	2.51394	2.74e-06	0.849402	1.64792	1.45769	0.9666	1.4543	1.13761	0.909761	1.14354	0.630034	1.36143	0.840268	1.12714	MM10000000009382804	0.950163	NA	NA	yes	yes	yes	yes	yes	yes	yes	yes	no	B3galnt1 (+95026)	B3GALNT1 (+132528)	0.28794	yes	0.0275388	no	0.88362
chr3	71467912	71468412	mm10_chr3.71467912.71468412	2.33159	0.000220066	1.58224	1.82274	0.505852	1.65655	1.61071	2.27935	1.28756	1.07443	0.9996	1.4861	0.281849	1.32609	MM10000000009392625	0.957923	NA	NA	yes	yes	yes	yes	yes	yes	yes	no	NA	NONE	NA	0.012112	yes	0.103124	no	1.09112
chr3	79861646	79862146	mm10_chr3.79861646.79862146	2.82348	5.39e-11	0.6141	1.34107	1.14618	0.586027	0.525118	0.986077	1.38783	0.370834	0.402986	1.03587	1.04225	0.858031	MM10000000009434594	0.904642	NA	0.987684	yes	yes	yes	yes	yes	no	no	yes	no	Tmem144 (-19217)	TMEM144 (-14845)	0.137836	no	-0.269001	no	0.157779
chr18	62514840	62515340	mm10_chr18.62514840.62515340	2.38998	5.37e-07	2.17748	3.13537	0.946176	0.988934	1.51919	1.88145	2.10557	0.653093	1.6964	2.40625	0.772927	1.66208	MM10000000005859064	0.999733	NA	0.984447	yes	yes	yes	yes	yes	yes	yes	yes	yes	Fbxo38 (+33653)	FBXO38 (+43655)	1.25234	yes	0.837463	yes	0.906763
chr3	81377421	81377921	mm10_chr3.81377421.81377921	1.46428	0.00609875	0.763333	0.0770104	0.792352	0.966027	1.41571	0.945413	1.28099	1.03464	0.778571	0.171976	0.471351	0.79067	MM10000000009442173	0.895967	NA	0.997916	yes	yes	yes	yes	yes	yes	yes	yes	no	Pdgfc (+341255)	PDGFC (+372877)	0.419814	yes	0.976797	no	0.693637
chr3	81614079	81614579	mm10_chr3.81614079.81614579	2.27281	1.25e-05	0.604481	0.179295	1.01876	2.32598	2.09607	1.4763	0.966083	1.39993	0.404244	0.296229	0.701693	1.04264	MM10000000009443356	0.801621	NA	0.989654	yes	yes	yes	yes	yes	yes	yes	yes	no	Ctso (-318272)	CTSO (-374926)	0.0884205	no	-0.0895575	no	1.85043
chr3	82152486	82152986	mm10_chr3.82152486.82152986	1.83538	0.00137989	1.00027	1.30033	1.23885	1.01635	1.07146	1.20631	1.69581	0.131179	0.922202	1.08536	1.05985	1.06618	MM10000000009446048	NA	NA	NA	yes	yes	yes	yes	yes	yes	yes	yes	no	Gucy1a3 (-7663)	GUCY1A3 (-6921)	-0.056046	no	0.294752	no	0.778141
chr3	82660558	82661058	mm10_chr3.82660558.82661058	2.89804	1.82e-38	1.45027	2.27914	0.936954	2.13568	2.24334	2.40683	1.4221	1.71895	1.13888	1.97885	0.947759	1.69625	MM10000000009448589	0.886477	NA	0.994794	yes	yes	yes	yes	yes	yes	yes	yes	no	Npy2r (-112724)	NPY2R (-148122)	0.362974	yes	0.256312	yes	0.174622
chr3	82660767	82661267	mm10_chr3.82660767.82661267	2.89804	1.82e-38	0.824877	1.76805	0.612818	0.953382	1.08454	1.61792	1.37765	0.527216	0.713445	1.33096	0.546443	1.03248	MM10000000009448590	0.824786	NA	0.998326	yes	yes	yes	yes	yes	yes	yes	yes	no	Npy2r (-112933)	NPY2R (-148234)	0.37669	yes	-0.10501	yes	-0.119716
chr3	82883167	82883667	mm10_chr3.82883167.82883667	2.74517	4.73e-14	1.42032	1.17818	1.15124	1.00024	1.13433	0.881339	2.171	0.52599	1.18271	0.98979	0.885722	1.13826	MM10000000009449702	0.915215	NA	0.986635	yes	yes	yes	yes	yes	yes	yes	no	NA	Rbm46 (-6934)	NA	0.025934	no	0.334619	no	-0.059778
chr3	83534622	83535122	mm10_chr3.83534622.83535122	2.29597	0.00192937	1.67017	3.22052	2.49995	2.15585	2.48995	2.49696	2.27727	1.06998	1.09095	2.40586	1.57313	2.08642	MM10000000009452959	0.997374	0.999803	0.993587	yes	yes	yes	yes	yes	yes	yes	yes	no	Sfrp2 (-231449)	SFRP2 (-252090)	0.040962	no	0.190629	no	0.940324
chr3	84127393	84127893	mm10_chr3.84127393.84127893	1.58652	0.00195233	1.51371	0.554648	1.88336	1.2465	1.36567	1.10231	2.07886	0.668642	0.999703	0.754547	1.74267	1.2646	MM10000000009455923	0.75408	NA	0.999603	yes	yes	yes	no	yes	yes	no	yes	no	Mnd1 (+28143)	MND1 (+31308)	0.145354	yes	0.723084	no	1.36949
chr3	84975041	84975541	mm10_chr3.84975041.84975541	1.83446	0.0010492	0.920199	1.28619	1.8451	1.28178	1.24056	1.70216	1.05595	1.17013	0.637241	1.09713	1.25873	1.22683	MM10000000009460161	0.96466	NA	0.988303	yes	yes	yes	yes	yes	yes	yes	yes	no	Fbxw7 (+160023)	FBXW7 (+210807)	0.135246	yes	0.145221	no	0.945497
chr3	84975218	84975718	mm10_chr3.84975218.84975718	1.83446	0.0010492	1.12168	2.1573	0.994628	1.44734	1.5365	2.38904	0.741678	1.11501	1.00022	1.8014	0.722329	1.3661	MM10000000009460162	0.986216	NA	0.983355	yes	yes	yes	yes	yes	yes	yes	yes	no	Fbxw7 (+160200)	FBXW7 (+210992)	0.201764	yes	-0.0607826	no	0.430276
chr3	85323223	85323723	mm10_chr3.85323223.85323723	2.63893	8.61e-14	0.718951	2.07899	1.72992	1.19976	1.47737	1.78051	1.82696	2.92593	0.528739	1.51052	1.32856	1.55511	MM10000000009461902	0.954925	NA	NA	yes	yes	yes	yes	yes	yes	yes	no	NA	Gatb (-250646)	NA	0.094488	yes	0.519814	no	1.86736
chr3	89637216	89637716	mm10_chr3.89637216.89637716	3.16004	1.16e-08	3.10686	2.54416	2.72205	2.27803	3.16996	2.28263	4.83448	1.83452	2.29006	2.2381	2.35765	2.69623	MM10000000009483472	0.991267	NA	NA	yes	yes	yes	yes	yes	yes	yes	no	NA	Adar (-93282)	NA	0.08426	no	1.13675	no	1.2154
chr3	89637502	89638002	mm10_chr3.89637502.89638002	3.16004	1.16e-08	1.00016	1.95149	0.595294	0.784605	0.554828	1.77898	1.26734	0.370524	0.733525	1.60596	0.365079	1.00071	MM10000000009483473	0.994516	NA	0.987934	yes	yes	yes	yes	yes	yes	yes	no	NA	Adar (-92996)	NA	0.079558	no	-0.146156	no	1.64122
chr3	90418232	90418732	mm10_chr3.90418232.90418732	2.25845	5.22e-07	0.964282	1.62821	0.740117	0.505795	0.514926	1.07202	0.783319	1.1793	0.873529	1.26595	0.353632	0.89828	MM10000000009487377	0.952694	NA	NA	yes	yes	yes	yes	yes	yes	yes	yes	no	Ints3 (+15047)	INTS3 (+16044)	0.110516	no	0.37974	no	-0.326438
chr3	94800560	94801060	mm10_chr3.94800560.94801060	2.95983	3.7e-06	1.23907	2.17101	0.578855	1.29346	1.38665	1.62651	1.0363	0.545278	1.00002	1.66962	0.530815	1.18887	MM10000000009509289	0.730851	NA	NA	yes	yes	yes	yes	yes	yes	yes	no	NA	Cgn (-14318)	NA	0.135834	no	0.342747	no	-0.115437
chr3	96785614	96786114	mm10_chr3.96785614.96786114	2.52362	0.00106885	1.30016	1.90965	1.75516	1.98719	2.28652	2.47985	2.31862	1.17141	1.08772	1.80168	1.4095	1.77341	MM10000000009519214	0.992349	NA	NA	yes	yes	yes	yes	yes	no	no	yes	no	Cd160 (+43487)	CD160 (+22297)	0.417156	no	0.506905	no	0.772862
chr3	97755406	97755906	mm10_chr3.97755406.97755906	2.57716	6.63e-09	2.04494	1.53033	1.36572	1.69197	2.04077	1.29503	1.57563	1.873	1.34381	1.29327	1.01374	1.55166	MM10000000009524063	0.926272	0.983511	0.992354	yes	yes	yes	no	yes	no	no	yes	no	Prkab2 (+97444)	PDE4DIP (+76079)	0.235818	no	0.940635	no	1.09328
chr3	97891578	97892078	mm10_chr3.97891578.97892078	2.45896	8.76e-07	1.87799	2.09147	0.89454	2.18049	2.53057	1.85704	1.63195	0.696998	1.26595	1.78439	0.643091	1.58677	MM10000000009524744	0.995654	NA	NA	no	yes	yes	yes	yes	no	no	no	NA	Pde4dip (-3121)	NA	0.100564	no	0.673691	no	-0.0584501
chr3	100180464	100180964	mm10_chr3.100180464.100180964	2.06684	3.79e-10	1.76461	2.59225	2.59979	1.83846	2.21036	1.77867	2.97283	2.35713	1.34145	1.75121	1.78045	2.08975	MM10000000009536188	0.990992	NA	0.999541	yes	yes	yes	yes	yes	no	no	yes	no	Wdr3 (-18307)	GDAP2 (+20753)	0.060978	yes	0.409716	yes	0.792962
chr3	100469328	100469828	mm10_chr3.100469328.100469828	2.1784	3.68e-06	2.35955	3.15486	1.83132	2.29035	2.41432	2.47684	2.92125	2.27945	1.58208	2.50524	1.29101	2.28239	MM10000000009537632	0.995736	NA	NA	yes	yes	yes	yes	yes	yes	yes	yes	no	Fam46c (+19746)	FAM46C (+20971)	0.226326	no	0.498739	no	0.602115
chr3	100546007	100546507	mm10_chr3.100546007.100546507	3.11441	1.8e-09	1.00002	1.83416	1.78188	1.50899	1.43768	2.17348	1.86554	2.37183	0.856409	1.51034	1.30345	1.60398	MM10000000009538016	0.959113	NA	NA	yes	yes	yes	yes	yes	yes	yes	no	NA	Fam46c (-56933)	NA	0.087452	yes	0.671531	no	0.776136
chr3	100822961	100823461	mm10_chr3.100822961.100823461	2.93632	7.77e-08	3.27068	4.8141	1.32351	3.37148	4.15194	4.30193	2.75895	1.28135	2.60069	3.82905	0.800117	2.95489	MM10000000009539401	0.998658	0.999971	NA	yes	yes	yes	yes	yes	yes	yes	yes	no	Vtcn1 (-2248)	VTCN1 (-2553)	-0.058246	yes	1.44446	no	0.638123
chr3	101328469	101328969	mm10_chr3.101328469.101328969	3.61919	1.51e-12	1.00027	2.52308	1.23497	2.42961	2.30912	2.38325	1.52093	1.9686	0.744571	1.69516	1.0221	1.71197	MM10000000009541928	0.946313	NA	NA	yes	yes	yes	yes	yes	yes	yes	yes	no	Cd2 (-40780)	IGSF3 (-36743)	0.132164	yes	0.376389	no	-0.466322
chr3	101606992	101607492	mm10_chr3.101606992.101607492	2.86056	7.18e-22	2.25713	2.57298	1.57313	2.46931	2.50967	2.34752	2.62387	0.57825	1.63124	1.95505	1.16999	1.97165	MM10000000009543321	0.997228	NA	NA	yes	yes	yes	yes	yes	no	no	yes	no	Atp1a1 (-2558)	ATP1A1 (-3429)	0.218756	yes	0.837566	yes	0.820818
chr3	102446591	102447091	mm10_chr3.102446591.102447091	1.92291	0.00173423	0.99992	1.13774	0.640558	0.422278	0.512732	0.731947	1.73482	2.02449	0.765263	0.933863	0.682566	0.96238	MM10000000009547519	0.839435	0.994583	NA	yes	yes	yes	yes	yes	yes	yes	yes	no	Ngf (-23087)	NGF (-26300)	0.696604	no	0.129028	no	-0.395486
chr3	102760539	102761039	mm10_chr3.102760539.102761039	1.77605	0.000190539	1.11759	1.54173	0.73486	1.06593	1.09862	1.05207	0.540767	3.27062	1.00323	1.34199	0.542743	1.21001	MM10000000009549088	0.798521	NA	0.992336	yes	yes	yes	yes	yes	yes	yes	yes	no	Tshb (+21885)	TSHB (+27923)	0.281236	no	0.808837	no	-0.680911
chr3	105071474	105071974	mm10_chr3.105071474.105071974	3.18521	1.34e-08	1.71077	1.81112	0.226078	1.22644	1.24885	1.74351	2.12456	0.990334	1.26841	1.54657	0.333823	1.29368	MM10000000009560643	0.988503	NA	NA	no	yes	yes	yes	yes	yes	yes	no	NA	4930564D02Rik (+4880)	NA	0.0430804	no	0.711816	no	-0.0311011
chr3	107487802	107488302	mm10_chr3.107487802.107488302	2.39488	2.77e-07	1.53069	1.70683	1.55892	0.990558	1.22909	0.56037	2.20605	2.36067	1.0688	1.43166	1.25702	1.44551	MM10000000009572725	0.992928	NA	NA	yes	yes	yes	yes	yes	no	no	yes	no	Kcnc4 (-28500)	SLC6A17 (+29897)	0.003314	yes	0.892541	yes	0.973049
chr3	109024165	109024665	mm10_chr3.109024165.109024665	2.44901	2.52e-06	1.6158	1.34601	1.05309	1.49946	2.09725	2.05332	2.15004	0.291587	1.19906	1.35604	0.980404	1.42201	MM10000000009580407	0.99611	0.999992	NA	yes	yes	yes	yes	yes	no	no	yes	no	Fam102b (+3192)	HENMT1 (+98254)	0.077626	no	0.860834	no	-0.0626496
chr3	109512263	109512763	mm10_chr3.109512263.109512763	1.9881	2.77e-05	1.32265	1.44844	0.946483	1.12631	1.09028	0.805775	1.31122	1.45971	1.08563	1.36756	0.83367	1.16343	MM10000000009582847	0.850364	0.999267	0.99578	yes	yes	yes	yes	yes	yes	yes	yes	no	Vav3 (+171860)	VAV3 (+201875)	0.01093	no	0.689551	no	0.223048
chr3	109512609	109513109	mm10_chr3.109512609.109513109	1.9881	2.77e-05	0.880765	1.5621	0.979437	1.13004	1.03726	1.63291	1.48616	1.06256	0.587435	1.17869	0.799298	1.12151	MM10000000009582849	0.99945	1	0.985034	yes	yes	yes	yes	yes	yes	yes	yes	no	Vav3 (+172206)	VAV3 (+202246)	0.072376	no	-0.0544623	no	0.138528
chr3	115250885	115251385	mm10_chr3.115250885.115251385	1.55612	0.00686287	0.999908	2.6839	1.58997	1.7414	2.18001	2.3436	3.17643	1.71398	0.827219	2.00112	1.32681	1.8713	MM10000000009611540	0.976725	NA	0.993468	yes	yes	yes	yes	yes	yes	yes	yes	no	Olfm3 (+170170)	OLFM3 (+161319)	0.296758	yes	0.361256	yes	1.05038
chr3	115251146	115251646	mm10_chr3.115251146.115251646	1.55612	0.00686287	1.74008	1.74265	2.11638	2.09586	2.55425	1.36737	2.68006	3.40047	1.23099	1.44887	1.49241	1.98813	MM10000000009611541	0.988843	0.999945	0.998905	yes	yes	yes	yes	yes	yes	yes	yes	no	Olfm3 (+170431)	OLFM3 (+161650)	0.13686	yes	0.647286	yes	0.886955
chr3	115251447	115251947	mm10_chr3.115251447.115251947	1.55612	0.00686287	1.13754	2.80409	1.34924	2.15178	2.22029	2.05302	1.15514	0.87224	0.90806	2.0359	1.07435	1.6147	MM10000000009611543	0.924799	NA	NA	no	yes	yes	yes	yes	yes	yes	yes	no	Olfm3 (+170732)	OLFM3 (+162096)	-0.03042	yes	-0.208911	yes	1.35563
chr3	115284408	115284908	mm10_chr3.115284408.115284908	1.98095	6.32e-06	1.41029	2.13845	4.14596	1.93563	2.54566	2.19996	4.69505	1.42001	1.15687	1.82451	3.12926	2.41833	MM10000000009611708	0.987964	NA	0.99983	yes	yes	yes	yes	yes	yes	yes	no	NA	Olfm3 (+203693)	NA	0.061932	no	0.332768	no	0.943616
chr3	116315163	116315663	mm10_chr3.116315163.116315663	2.11137	2.22e-05	0.1179	0.835151	0.681896	0.0983397	0.265049	0.518909	1.23851	0.0246723	0.0878145	0.672522	0.483322	0.456735	MM10000000009616862	0.978378	NA	NA	no	yes	yes	yes	yes	yes	yes	yes	no	Gpr88 (-61910)	GPR88 (-60318)	0.298752	no	-0.722933	no	-0.805203
chr3	116315505	116316005	mm10_chr3.116315505.116316005	2.11137	2.22e-05	1.4525	1.4526	0.4712	1.33321	1.60191	0.967946	0.987356	2.85839	1.21362	1.12448	0.538044	1.27284	MM10000000009616863	0.970287	0.998756	0.997391	yes	yes	yes	yes	yes	yes	yes	yes	no	Gpr88 (-62252)	GPR88 (-60699)	0.182796	no	0.697629	no	0.0718724
chr3	117141160	117141660	mm10_chr3.117141160.117141660	2.07646	0.000532164	0.898417	2.37909	1.54247	2.35613	2.18304	3.047	2.11285	0.491913	0.609485	1.96602	1.03972	1.69328	MM10000000009620992	0.738169	NA	NA	yes	yes	yes	yes	yes	no	no	yes	no	Palmd (-172423)	PALMD (-153710)	0.326112	no	0.42787	yes	2.20832
chr9	112117980	112118480	mm10_chr9.112117980.112118480	1.76852	0.000704976	2.11238	2.77141	0.578886	1.84093	2.39618	2.75578	0.285513	0.688575	1.44292	2.31219	0.323142	1.59163	MM10000000012285139	NA	NA	NA	yes	yes	yes	yes	yes	yes	yes	yes	yes	Arpp21 (+69536)	ARPP21 (+65167)	0.064588	yes	0.701948	yes	0.677639
chr3	117752907	117753407	mm10_chr3.117752907.117753407	1.62309	0.00034068	0.999924	2.35622	0.998799	0.533931	0.569321	0.830645	0.204052	1.59159	0.907687	1.58558	0.650418	1.02074	MM10000000009624050	0.914716	NA	NA	no	no	no	no	no	no	no	yes	no	Snx7 (+115779)	SNX7 (+131656)	0.0417365	yes	0.236249	yes	0.442202
chr3	122255349	122255849	mm10_chr3.122255349.122255849	2.20542	1.28e-06	1.79014	2.49908	1.00716	2.63697	2.95349	3.11717	2.15266	0.115609	1.22828	2.29464	0.790127	1.87139	MM10000000009646562	0.764724	NA	NA	yes	yes	yes	yes	yes	no	no	yes	no	Gclm (+10042)	GCLM (+4880)	0.32473	no	0.274746	no	0.321823
chr3	122741857	122742357	mm10_chr3.122741857.122742357	1.78266	0.00371271	0.958309	2.03497	1.80514	0.586051	0.842973	1.25016	2.01895	3.76373	0.765557	1.59668	1.20792	1.53004	MM10000000009648995	0.991416	NA	0.993594	yes	yes	yes	yes	yes	yes	yes	yes	no	Pde5a (+13160)	PDE5A (+12524)	0.113742	no	0.327094	yes	1.28168
chr3	123072046	123072546	mm10_chr3.123072046.123072546	2.00692	0.00399602	0.671432	1.55421	0.833006	0.646994	0.865139	1.29486	2.06619	1.09645	0.424232	1.22009	0.749781	1.0384	MM10000000009650646	0.716624	NA	NA	yes	yes	yes	yes	yes	no	no	yes	no	Myoz2 (-37281)	MYOZ2 (-65196)	0.146325	yes	-0.335084	no	0.199904
chr3	123354863	123355363	mm10_chr3.123354863.123355363	2.04905	0.000251174	1.01417	0.406215	0.910299	0.689464	0.6866	0.232317	1.61342	1.08179	1.00029	0.309826	0.711071	0.78686	MM10000000009652060	NA	NA	NA	no	yes	yes	no	yes	yes	no	yes	no	Mettl14 (+30995)	METTL14 (+53709)	0.244022	no	0.455999	no	0.404345
chr3	123355269	123355769	mm10_chr3.123355269.123355769	2.04905	0.000251174	1.00005	2.19605	1.28483	0.637174	0.849894	0.921828	1.51907	2.29648	0.726024	1.6365	0.870772	1.26715	MM10000000009652062	0.988025	NA	0.996155	no	yes	yes	no	yes	yes	no	yes	no	Mettl14 (+30589)	METTL14 (+53261)	0.100296	no	-0.129841	no	-0.106247
chr3	127525480	127525980	mm10_chr3.127525480.127525980	1.54492	0.00541908	1.88917	2.23807	0.620661	1.27156	2.1139	1.91969	0.320896	1.25976	1.40063	1.97088	0.349571	1.39589	MM10000000009672913	0.941031	NA	0.983402	yes	yes	yes	no	no	yes	no	yes	no	Larp7 (+27619)	LARP7 (+34103)	0.18359	yes	0.947672	yes	-0.0613841
chr3	129154545	129155045	mm10_chr3.129154545.129155045	1.94872	0.000198768	0.913521	0.932067	1.60016	0.348049	0.419813	0.878984	1.1388	1.61715	1.00006	0.754356	1.30321	0.99147	MM10000000009681058	0.937337	0.995992	0.983065	yes	yes	yes	yes	yes	yes	yes	yes	no	Pitx2 (-59177)	PITX2 (-55951)	0.094738	no	0.961541	yes	0.964799
chr3	129313156	129313656	mm10_chr3.129313156.129313656	1.86745	0.00242912	0.689559	0.206657	0.590764	0.756234	1.19364	1.2456	1.71898	2.5306	0.494321	0.142042	0.533853	0.918386	MM10000000009681852	0.974376	NA	0.99571	yes	yes	yes	yes	yes	yes	yes	yes	no	Enpep (+19314)	ENPEP (+29958)	-0.030966	no	-0.248812	no	-0.104978
chr3	129677959	129678459	mm10_chr3.129677959.129678459	2.04243	8.06e-05	1.53967	3.61249	1.85398	3.44516	3.22484	3.43658	2.299	0.40028	1.41853	2.88925	1.30573	2.31141	MM10000000009683676	0.858927	NA	0.985924	yes	yes	yes	yes	yes	no	no	yes	no	Egf (+77107)	EGF (+98682)	0.12906	no	0.739089	yes	0.706392
chr3	130385787	130386287	mm10_chr3.130385787.130386287	2.32097	8.47e-11	0.981195	1.12498	1.4346	1.04678	1.22428	1.12014	1.05024	0.243951	0.937729	1.00574	1.16584	1.0305	MM10000000009687215	0.964743	NA	0.995016	yes	yes	yes	yes	yes	yes	yes	yes	no	Col25a1 (+205146)	COL25A1 (+251532)	0.220823	yes	0.368219	yes	0.683399
chr3	130579556	130580056	mm10_chr3.130579556.130580056	2.47221	2.87e-09	2.56778	2.74261	1.33915	2.45259	2.56156	2.44288	2.96563	2.22452	1.77123	2.17731	1.01726	2.20568	MM10000000009688184	0.999226	NA	NA	yes	yes	yes	yes	yes	yes	yes	yes	no	Etnppl (-37763)	ETNPPL (-67521)	0.375022	yes	1.34864	yes	1.3982
chr3	130579782	130580282	mm10_chr3.130579782.130580282	2.47221	2.87e-09	2.20289	2.04409	1.20986	1.76929	1.91999	1.35503	1.67646	0.644252	1.58679	1.54299	0.845978	1.52706	MM10000000009688185	0.990592	NA	NA	yes	yes	yes	yes	yes	yes	yes	yes	no	Etnppl (-37537)	ETNPPL (-67347)	0.128054	yes	0.837589	yes	1.49962
chr3	131154448	131154948	mm10_chr3.131154448.131154948	1.9208	0.00524904	1.43056	1.93172	0.742989	2.34694	2.53265	3.05367	2.50319	0.145542	1.10938	1.52631	0.674893	1.63617	MM10000000009691058	0.997604	0.999989	0.99179	yes	yes	yes	yes	yes	no	no	yes	no	Lef1 (+44227)	LEF1 (+49662)	0.42843	no	0.833037	yes	0.847303
chr3	131636051	131636551	mm10_chr3.131636051.131636551	1.6606	7.56e-05	2.6867	1.25423	0.997721	1.80838	1.85413	1.10494	1.48228	0.0273118	2.01487	0.958026	0.995632	1.38038	MM10000000009693466	0.883628	NA	0.997469	yes	yes	yes	yes	yes	no	no	yes	no	Papss1 (+71533)	PAPSS1 (+94901)	0.08063	yes	1.2941	yes	0.637592
chr3	132834753	132835253	mm10_chr3.132834753.132835253	1.8002	4.84e-05	1.06043	1.21161	0.646861	0.605362	0.753546	0.749576	0.763262	1.44862	0.991802	1.01651	0.408046	0.877784	MM10000000009699460	0.901945	NA	NA	yes	yes	yes	yes	yes	yes	yes	yes	no	Npnt (+115040)	NPNT (+156075)	0.065774	no	0.483195	no	-0.48964
chr3	132835078	132835578	mm10_chr3.132835078.132835578	1.8002	4.84e-05	1.26433	1.67002	0.96815	0.429246	0.623916	1.0244	0.727914	0.795148	1.09783	1.24484	0.701273	0.958824	MM10000000009699461	0.664781	NA	0.985659	yes	yes	yes	yes	yes	yes	yes	yes	no	Npnt (+114715)	NPNT (+155748)	0.09069	no	0.678345	no	0.910275
chr3	132951401	132951901	mm10_chr3.132951401.132951901	1.72736	0.00190567	0.760787	1.33903	1.29546	0.877985	1.27616	1.63584	0.832523	2.38395	0.530461	1.11156	0.957808	1.18196	MM10000000009700043	0.463376	NA	0.99063	yes	yes	yes	yes	yes	yes	yes	yes	no	Npnt (-1608)	NPNT (-1716)	0.51981	no	-0.637515	no	-0.434847
chr3	133223898	133224398	mm10_chr3.133223898.133224398	1.88353	7.53e-07	0.867447	1.36148	1.68616	0.843325	0.820509	1.64523	1.34502	0.180647	0.84547	1.16895	1.10448	1.07897	MM10000000009701405	0.933678	NA	0.988022	yes	yes	yes	yes	yes	no	no	yes	no	Arhgef38 (+10741)	ARHGEF38 (+12513)	0.344708	yes	0.208945	yes	0.810926
chr3	133224566	133225066	mm10_chr3.133224566.133225066	1.88353	7.53e-07	1.633	3.20314	1.19403	1.11061	1.29848	2.10173	2.06749	0.191191	1.22411	2.63233	1.00883	1.6059	MM10000000009701409	0.702264	0.995705	NA	no	no	no	no	no	no	no	no	NA	Arhgef38 (+10073)	NA	0.00141935	yes	0.0210741	yes	0.782987
chr3	133509690	133510190	mm10_chr3.133509690.133510190	1.47664	0.00236012	0.999754	0.91485	1.71536	0.611656	0.616963	1.01562	0.995037	1.68369	0.677163	0.746058	1.03581	1.00109	MM10000000009702834	0.67308	NA	0.992578	yes	yes	yes	yes	yes	no	no	yes	no	Tet2 (+34428)	TET2 (+48844)	0.137028	yes	-0.0118967	yes	0.31697
chr3	133590416	133590916	mm10_chr3.133590416.133590916	2.39899	9.42e-06	1.0951	2.53034	0.705015	0.519165	0.687995	1.14133	0.985013	3.2734	0.914267	1.82654	0.578293	1.29604	MM10000000009703238	0.867655	NA	0.985946	yes	yes	yes	yes	yes	yes	yes	yes	no	Tet2 (-46298)	TET2 (-39683)	0.149086	no	0.146206	no	-1.7642
chr3	134153463	134153963	mm10_chr3.134153463.134153963	2.81236	1.8e-18	0.75607	0.686965	0.48652	0.00446513	0.766034	0.844927	0.119999	0.95843	0.696278	0.576183	0.237308	0.557562	MM10000000009706053	0.553357	NA	NA	yes	yes	yes	yes	yes	yes	yes	no	NA	Cxxc4 (-82778)	NA	0.018164	no	0.174511	no	-0.061273
chr3	134560123	134560623	mm10_chr3.134560123.134560623	2.60684	6.33e-06	0.780397	1.17958	0.912501	0.132781	0.219135	1.01718	1.65822	0.0716937	0.680713	1.00719	0.919386	0.779889	MM10000000009708086	0.594806	NA	NA	yes	yes	yes	yes	yes	yes	yes	yes	no	Tacr3 (-268634)	TACR3 (-351895)	0.363274	yes	0.384565	no	0.0125128
chr3	134995018	134995518	mm10_chr3.134995018.134995518	2.41632	3.43e-09	0.481507	1.56672	0.650041	0.812234	0.765271	1.54099	0.466578	2.09407	0.422558	1.3082	0.418181	0.956941	MM10000000009710261	0.896949	NA	0.989343	yes	yes	yes	yes	yes	yes	yes	no	NA	Tacr3 (+166261)	NA	0.2358	no	0.0811591	yes	1.8077
chr3	135015120	135015620	mm10_chr3.135015120.135015620	NA	NA	0.901229	0.987841	1.12203	0.388271	0.432275	0.3662	1.61984	1.26869	0.773187	0.840389	0.999866	0.881802	MM10000000009710361	0.713404	0.993173	NA	no	no	no	no	no	no	no	yes	no	Tacr3 (+186363)	CENPE (-242730)	0.105894	no	0.0733415	yes	0.0469098
chr3	135015465	135015965	mm10_chr3.135015465.135015965	NA	NA	0.793489	1.10055	0.374411	0.364353	0.0454041	0.484332	0.321069	0.686384	0.519109	1.00485	0.175528	0.533589	MM10000000009710363	0.971321	NA	NA	yes	yes	yes	yes	yes	no	no	yes	no	Tacr3 (+186708)	CENPE (-242581)	0.09915	no	0.0360953	yes	1.97641
chr3	135264140	135264640	mm10_chr3.135264140.135264640	1.86085	0.000287253	0.919185	1.66083	2.15027	0.886392	0.953675	0.817852	3.26801	0.507076	0.743913	1.39348	1.98473	1.38958	MM10000000009711606	0.996879	NA	NA	yes	yes	yes	yes	yes	yes	yes	yes	no	Bdh2 (-16831)	BDH2 (-16733)	0.142708	no	-0.213339	no	1.16459
chr3	135264574	135265074	mm10_chr3.135264574.135265074	1.86085	0.000287253	1.98216	2.52278	1.50807	1.33082	1.40473	1.88088	1.96512	2.29655	1.34372	2.01519	1.04556	1.75414	MM10000000009711609	NA	NA	NA	no	yes	yes	yes	yes	yes	yes	yes	no	Bdh2 (-16397)	BDH2 (-16338)	0.009182	no	0.58409	no	0.174331
chr3	135273035	135273535	mm10_chr3.135273035.135273535	2.15317	3.55e-08	1.64633	2.45627	1.14483	1.44799	1.79919	1.38103	1.56725	2.68422	1.12727	1.91645	0.669349	1.62183	MM10000000009711651	0.997179	NA	NA	yes	yes	yes	yes	yes	yes	yes	yes	no	Bdh2 (-7936)	BDH2 (-6270)	0.18986	no	0.302375	no	-0.0470495
chr3	135790624	135791124	mm10_chr3.135790624.135791124	1.84543	1.01e-05	1.38774	0.503121	0.536493	2.46568	2.61116	1.97551	1.66711	0.594825	1.05717	0.555309	0.501533	1.2596	MM10000000009714239	0.976665	NA	NA	yes	yes	yes	yes	yes	no	no	no	NA	Slc39a8 (-34916)	NA	0	yes	0.73039	no	0.183461
chr3	139043839	139044339	mm10_chr3.139043839.139044339	1.67458	0.000640732	1.00019	1.16935	1.22498	0.722083	0.748574	1.57934	1.94312	1.00213	0.613668	0.994283	0.944209	1.08563	MM10000000009730505	0.860342	NA	0.996337	yes	yes	yes	yes	yes	yes	yes	yes	no	Rap1gds1 (+31112)	RAP1GDS1 (+35082)	0.334872	no	2.72657e-05	no	0.434153
chr3	141507633	141508133	mm10_chr3.141507633.141508133	1.54233	0.000506925	1.0002	1.52175	1.33466	0.319375	0.698317	0.642812	1.20753	0.351847	0.900325	1.33203	1.02119	0.939094	MM10000000009742824	0.965962	NA	0.994468	yes	yes	yes	no	yes	no	no	yes	no	Unc5c (+42309)	UNC5C (+41510)	0.179378	no	0.0236903	no	0.354858
chr3	141598867	141599367	mm10_chr3.141598867.141599367	1.95412	8.22e-09	1.43231	1.81913	1.00018	1.10095	1.41994	1.86535	1.48776	1.47104	1.34134	1.53818	0.668281	1.37677	MM10000000009743280	0.973196	NA	NA	yes	yes	yes	yes	yes	yes	yes	yes	no	Unc5c (+133543)	UNC5C (+135822)	0.184772	yes	1.05081	yes	0.923112
chr3	144069766	144070266	mm10_chr3.144069766.144070266	1.61878	0.00304761	1.87406	1.87333	1.78326	1.45097	1.80949	1.34823	1.73735	1.03918	1.40388	1.60988	1.37878	1.57349	MM10000000009755635	0.94346	NA	NA	yes	yes	yes	yes	yes	yes	yes	yes	no	Lmo4 (+135204)	LMO4 (+145989)	0.083824	yes	0.74462	no	-0.0193429
chr3	146169404	146169904	mm10_chr3.146169404.146169904	2.63241	4.14e-05	1.19505	1.87071	2.78954	0.917358	1.23936	0.0584611	3.92973	0.190095	1.00026	1.52326	2.10481	1.52897	MM10000000009766133	0.976694	NA	NA	no	no	no	no	no	no	no	yes	no	Mcoln2 (+19821)	MCOLN2 (+38120)	0.103946	no	0.185045	no	0.352553
chr3	147592046	147592546	mm10_chr3.147592046.147592546	2.18075	6.19e-10	1.30168	2.06208	0.112208	1.59033	1.93535	1.8622	0.916017	1.29167	1.01281	1.86355	0.273413	1.29285	MM10000000009773246	0.99243	NA	0.985903	yes	yes	yes	yes	yes	yes	yes	yes	no	Ttll7 (+739929)	TTLL7 (+753997)	0.253598	no	0.408113	no	-0.294669
chr3	148422095	148422595	mm10_chr3.148422095.148422595	1.98707	0.00620467	1.38043	1.69746	1.85141	1.8595	2.81311	2.20075	3.06612	0.376748	1.08543	1.42844	1.21503	1.72495	MM10000000009777396	0.976244	NA	NA	yes	yes	yes	yes	yes	no	no	yes	no	Adgrl2 (+532313)	NONE	0.252582	no	1.01732	no	0.773802
chr3	148425882	148426382	mm10_chr3.148425882.148426382	2.90952	7.08e-27	0.999612	0.459499	0.555535	0.127083	0.554941	0.110617	0.740766	0.560086	0.963957	0.488641	0.219681	0.525493	MM10000000009777415	0.936553	NA	0.984293	yes	yes	yes	yes	yes	yes	yes	yes	no	Adgrl2 (+528526)	NONE	0.106654	no	0.969553	yes	-0.158692
chr3	148426240	148426740	mm10_chr3.148426240.148426740	2.90952	7.08e-27	1.14772	2.78205	0.750576	1.90766	2.36005	2.27999	2.12808	2.10354	0.8371	1.91023	0.574892	1.70744	MM10000000009777417	0.999235	NA	0.987839	yes	yes	yes	yes	yes	yes	yes	yes	no	Adgrl2 (+528168)	NONE	0.580956	no	0.208987	yes	0.951369
chr3	148426367	148426867	mm10_chr3.148426367.148426867	2.90952	7.08e-27	1.49054	2.21998	1.37667	1.70265	2.21921	1.90253	2.40567	1.79717	1.05535	1.62756	1.19998	1.72703	MM10000000009777418	0.994462	NA	0.986275	yes	yes	yes	yes	yes	yes	yes	yes	no	Adgrl2 (+528041)	NONE	0.619756	no	0.617432	yes	0.886115
chr3	149076091	149076591	mm10_chr3.149076091.149076591	1.72861	0.00937827	1.65199	2.22181	1.93811	1.84456	1.94784	1.92902	1.57663	1.19095	1.10596	1.68278	1.44334	1.68482	MM10000000009780666	0.978012	NA	0.989407	yes	yes	yes	no	yes	no	no	yes	no	Adgrl2 (-121683)	ADGRL2 (+394131)	0.530144	no	-0.0317439	yes	0.85054
chr3	151548670	151549170	mm10_chr3.151548670.151549170	2.27212	1.45e-09	1.45587	2.12188	0.889317	0.775851	0.8625	1.33687	1.63383	1.08002	0.999902	1.59105	0.687461	1.22132	MM10000000009793029	0.911181	NA	NA	yes	yes	yes	yes	yes	yes	yes	yes	no	Adgrl4 (+111033)	ADGRL4 (+121425)	0.747448	yes	0.451641	yes	1.07278
chr3	151801430	151801930	mm10_chr3.151801430.151801930	1.9016	0.000168341	2.68135	1.92827	2.96333	3.04581	3.16643	2.76925	3.89149	1.14369	2.07975	1.55641	2.29668	2.50204	MM10000000009794293	0.992178	0.999613	0.999344	yes	yes	yes	yes	yes	no	no	yes	no	Ptgfr (+35950)	PTGFR (+45578)	0.591982	no	0.9705	no	0.349613
chr3	152117081	152117581	mm10_chr3.152117081.152117581	2.3855	3.78e-05	1.88349	1.66096	1.72051	1.54452	1.84105	1.46585	2.34194	0.111768	1.55776	1.34156	1.59775	1.55156	MM10000000009795871	0.958181	NA	0.995357	yes	yes	yes	yes	yes	no	no	yes	no	Gipc2 (+48899)	GIPC2 (+58494)	-0.038432	yes	0.913454	no	0.234418
chr3	152121533	152122033	mm10_chr3.152121533.152122033	1.79982	5.38e-06	1.12484	1.18558	0.56135	0.392246	0.613462	0.394204	0.609708	0.782128	0.953348	1.11679	0.607372	0.758275	MM10000000009795893	0.700591	NA	0.994516	yes	yes	yes	yes	no	yes	no	yes	no	Gipc2 (+44447)	GIPC2 (+56310)	0.106168	no	0.476393	yes	0.56664
chr3	152923660	152924160	mm10_chr3.152923660.152924160	1.97097	7.53e-05	2.2545	1.73858	1.89699	1.1144	1.34291	1.77227	2.56841	1.24089	1.52237	1.55974	1.55168	1.68752	MM10000000009799904	0.965295	NA	0.998082	yes	yes	yes	yes	yes	no	no	yes	no	St6galnac5 (+58336)	ST6GALNAC5 (+71046)	0.258512	no	0.424279	yes	0.988296
chr3	152932000	152932500	mm10_chr3.152932000.152932500	2.52049	1.5e-05	1.08185	0.64165	2.77687	0.137038	0.580601	0.16406	2.66405	1.00297	0.999849	0.682901	2.29572	1.18432	MM10000000009799946	0.881316	NA	0.999611	yes	yes	yes	yes	yes	yes	yes	no	NA	St6galnac5 (+49996)	NA	0.0540655	no	0.181963	no	0.267885
chr3	153929379	153929879	mm10_chr3.153929379.153929879	2.64558	5.19e-07	1.74607	2.07271	0.41924	2.89253	3.21362	2.6055	1.36769	0.618598	1.2072	1.7504	0.237667	1.64829	MM10000000009804933	0.996722	NA	0.99134	yes	yes	yes	yes	yes	yes	yes	yes	no	Acadm (+15003)	ACADM (+25697)	0.076676	no	0.617563	no	0.00060209
chr3	154304903	154305403	mm10_chr3.154304903.154305403	1.70784	0.00506326	1.91878	2.12519	0.431314	0.00530884	0.304398	0.753475	0.552097	0.401792	1.33549	1.66143	0.285647	0.888629	MM10000000009806810	NA	NA	NA	no	yes	yes	yes	yes	no	no	yes	no	Lhx8 (+25506)	LHX8 (+34238)	0.063086	no	0.455758	yes	0.456285
chr3	154305133	154305633	mm10_chr3.154305133.154305633	1.70784	0.00506326	2.18762	1.86314	0.201006	1.53798	1.70418	1.7494	1.17892	1.16935	1.77412	1.5621	0.0399128	1.3607	MM10000000009806811	NA	NA	NA	yes	yes	yes	yes	yes	no	no	yes	no	Lhx8 (+25276)	LHX8 (+34008)	0.241986	no	1.24277	yes	-1.14216
chr3	154587736	154588236	mm10_chr3.154587736.154588236	2.02785	1.55e-05	2.24288	1.32085	2.30515	1.85222	2.25676	1.77779	2.86263	0.299401	1.71493	1.18066	1.83378	1.7861	MM10000000009808224	0.929285	NA	0.998712	yes	yes	yes	yes	yes	no	no	yes	no	Cryz (-8725)	CRYZ (-18509)	0.167218	no	0.88326	no	0.48894
chr3	156256640	156257140	mm10_chr3.156256640.156257140	2.723	2.5e-13	2.13336	2.52206	0.963472	1.68933	2.27944	3.05456	1.91184	2.16745	1.68151	1.98629	0.843883	1.93029	MM10000000009816569	0.998466	NA	NA	yes	yes	yes	yes	yes	yes	yes	no	NA	Negr1 (-304904)	NA	0.0904089	yes	1.17516	no	0.32617
chr3	157037882	157038382	mm10_chr3.157037882.157038382	2.32996	1.25e-11	1.27197	2.06571	1.34048	1.49095	1.25371	1.34731	1.97145	0.448433	0.918895	1.40306	1.18569	1.33615	MM10000000009820475	0.735782	NA	0.997569	yes	yes	yes	yes	yes	yes	yes	yes	no	Negr1 (+476338)	NEGR1 (+538878)	0.066062	yes	0.0696671	no	0.486215
chr3	157745674	157746174	mm10_chr3.157745674.157746174	2.90661	2.14e-12	2.92899	2.94457	2.74013	2.15788	2.99268	2.5112	3.52021	1.27913	2.20179	2.40658	2.13455	2.52888	MM10000000009824014	0.993437	NA	0.995314	yes	yes	yes	yes	yes	yes	yes	no	NA	Ptger3 (+179032)	NA	-0.034508	yes	0.945361	yes	0.544394
chr3	158001824	158002324	mm10_chr3.158001824.158002324	2.24235	3.9e-08	0.805439	2.37821	1.94518	0.79393	1.19646	1.69359	2.79589	0.723364	0.734751	1.68569	1.56488	1.4834	MM10000000009825295	0.949996	NA	0.997213	yes	yes	yes	yes	yes	no	no	no	NA	Srsf11 (+34565)	NA	0.00268	no	-0.140302	no	0.122901
chr3	158883625	158884125	mm10_chr3.158883625.158884125	2.01135	0.00907002	1.30905	2.32127	2.98363	1.7835	1.812	1.44688	4.00441	4.13969	1.00004	1.87774	2.41659	2.28135	MM10000000009829704	0.988263	NA	NA	yes	yes	yes	yes	yes	yes	yes	yes	no	Lrrc7 (-321654)	LRRC7 (-511886)	0.089928	no	-0.168207	no	1.04786
chr4	9527087	9527587	mm10_chr4.9527087.9527587	2.36644	5.01e-06	0.596533	0.193321	1.35601	1.00574	0.845589	0.625971	1.86481	1.54106	0.258332	0.231465	1.00861	0.866131	MM10000000008300386	0.98318	0.957216	0.977524	yes	yes	yes	yes	yes	yes	yes	yes	no	Asph (+141825)	ASPH (+154755)	-0.087746	yes	-0.23163	no	0.480185
chr4	10171340	10171840	mm10_chr4.10171340.10171840	1.76883	3.26e-05	1.08918	1.15811	0.566066	0.600803	0.930617	0.54694	2.19561	0.853192	0.907547	0.909822	0.852381	0.96457	MM10000000008303607	0.855608	NA	0.976527	yes	yes	yes	no	yes	yes	no	yes	no	Gdf6 (+327218)	GDF6 (+296638)	0.098188	yes	-0.0205301	no	-0.0628113
chr4	10171906	10172406	mm10_chr4.10171906.10172406	1.76883	3.26e-05	0.723426	0.077936	0.68431	0.211398	0.543379	0.266898	0.70415	0.827074	0.715676	0.422608	0.444889	0.511068	MM10000000008303610	NA	NA	NA	no	no	no	no	no	no	no	yes	no	Gdf6 (+327784)	GDF6 (+297386)	-0.045258	yes	0.295005	no	0.253693
chr4	11884821	11885321	mm10_chr4.11884821.11885321	1.69499	0.00519946	2.45111	2.06246	0.51004	1.66667	2.00949	2.14413	2.05332	0.610019	1.81305	1.42909	0.34919	1.55442	MM10000000008312175	NA	NA	0.97595	yes	yes	yes	no	yes	no	no	yes	no	Pdp1 (+80910)	PDP1 (+111661)	0.174678	no	1.38907	no	-0.0145928
chr4	11885723	11886223	mm10_chr4.11885723.11886223	1.69499	0.00519946	0.494835	3.13332	1.21245	0.0927916	0.422663	1.26528	1.55349	2.27724	0.234822	2.21245	0.952368	1.25925	MM10000000008312179	0.933508	NA	NA	no	yes	yes	yes	yes	yes	yes	yes	no	Pdp1 (+80008)	PDP1 (+111083)	-0.020678	no	-0.634079	no	0.296743
chr4	18626648	18627148	mm10_chr4.18626648.18627148	2.39399	2.96e-07	0.538207	1.94863	1.72234	1.61873	1.46	1.83196	2.15694	2.73079	0.346399	1.20439	1.26917	1.52978	MM10000000008345884	0.970297	NA	0.976244	yes	yes	yes	yes	yes	yes	yes	no	NA	Cnbd1 (+495628)	NA	0.044626	no	0.502139	yes	0.937892
chr4	22177311	22177811	mm10_chr4.22177311.22177811	2.20973	2.34e-07	1.18018	2.2613	1.67767	1.96259	1.82275	2.12926	1.71153	0.63081	0.995605	1.8813	1.10224	1.57775	MM10000000008363637	0.668099	NA	0.978353	yes	yes	yes	yes	yes	yes	yes	no	NA	Fbxl4 (-179982)	NA	0	yes	-0.397128	yes	0.433599
chr4	22203714	22204214	mm10_chr4.22203714.22204214	2.1215	0.0008116	1.20313	2.35795	2.11906	1.58454	1.71415	2.03788	2.58776	1.87484	1.00047	1.92549	1.31277	1.79255	MM10000000008363769	0.860998	0.93186	0.975591	yes	yes	yes	yes	yes	yes	yes	yes	no	Fbxl4 (-153579)	FBXL4 (-111132)	0.064736	no	0.423133	yes	1.01343
chr4	26402196	26402696	mm10_chr4.26402196.26402696	1.87597	6.15e-05	1.44059	1.25114	0.343757	0.00227471	0.656538	0.274644	1.53016	2.2697	1.04782	1.006	0.137006	0.905421	MM10000000008384762	0.988605	0.987783	0.976101	yes	yes	yes	yes	yes	yes	yes	no	NA	Manea (-55555)	NA	0	no	0.716358	no	-0.11884
chr4	26409289	26409789	mm10_chr4.26409289.26409789	3.16932	1.11e-36	0.686114	3.31417	0.952376	2.70001	2.59366	2.61352	1.69338	2.33878	0.506862	2.52802	0.413984	1.84917	MM10000000008384797	0.956318	NA	0.976403	yes	yes	yes	yes	yes	yes	yes	no	NA	Manea (-62648)	NA	0.031422	yes	-0.0440481	yes	1.42866
chr4	29282120	29282620	mm10_chr4.29282120.29282620	2.28379	6.72e-13	1.37974	2.79674	0.49239	0.611107	0.878895	1.51192	0.416389	1.07035	1.1494	2.12596	0.331675	1.16042	MM10000000008399161	0.864775	NA	NA	yes	yes	yes	yes	yes	yes	yes	yes	no	Epha7 (+469239)	EPHA7 (+454532)	0.409672	yes	0.549211	yes	1.28435
chr4	29282368	29282868	mm10_chr4.29282368.29282868	2.28379	6.72e-13	0.89973	1.19715	2.14742	1.04064	1.16029	1.48698	2.73835	1.33333	0.82682	1.04976	1.5177	1.39983	MM10000000008399163	0.996703	NA	NA	yes	yes	yes	yes	yes	yes	yes	yes	no	Epha7 (+469487)	EPHA7 (+454803)	0.719824	yes	0.235979	yes	0.533936
chr4	32158862	32159362	mm10_chr4.32158862.32159362	3.16391	6.58e-07	1.52135	2.08112	1.50706	0.655645	1.00599	1.35282	2.1986	1.12441	1.17474	1.58314	1.04811	1.38664	MM10000000008413545	0.997872	NA	NA	yes	yes	yes	yes	yes	no	no	no	NA	Bach2 (-79692)	NA	0.0751625	yes	0.522083	yes	1.01688
chr4	32201133	32201633	mm10_chr4.32201133.32201633	2.02716	0.000692516	1.56799	1.19239	1.58701	0.720758	1.40665	0.756705	2.37264	1.23041	1.04496	1.05318	1.03987	1.27023	MM10000000008413756	0.87165	NA	0.97667	yes	yes	yes	yes	yes	yes	yes	yes	no	Bach2 (-37421)	BACH2 (-47129)	0.065766	no	0.496947	no	0.176985
chr4	32722706	32723206	mm10_chr4.32722706.32723206	2.98522	3.36e-10	0.796602	0.641989	1.0272	0.157755	0.748281	1.2738	0.751382	2.11492	0.8547	0.713866	0.733593	0.89219	MM10000000008416364	0.978693	NA	NA	yes	yes	yes	yes	yes	yes	yes	yes	no	Mdn1 (+65837)	LYRM2 (-73975)	0.2761	yes	0.633793	yes	0.204828
chr4	34467817	34468317	mm10_chr4.34467817.34468317	1.9453	0.00131637	0.952824	1.32372	1.76042	0.1284	0.000885463	0.571798	2.93695	1.0238	0.706755	1.058	1.519	1.08932	MM10000000008425090	0.71285	NA	NA	yes	yes	no	yes	no	no	no	yes	no	Akirin2 (-82870)	AKIRIN2 (-71465)	0.114586	no	-0.0902753	yes	0.296286
chr4	43818792	43819292	mm10_chr4.43818792.43819292	2.80356	1.44e-09	1.30182	1.4856	0.858977	2.05607	2.15027	1.50176	1.80734	2.75997	1.00008	1.26735	0.734329	1.53851	MM10000000008471845	0.372274	NA	0.976453	yes	yes	yes	yes	yes	yes	yes	no	NA	Olfr156 (+4824)	NA	0.047676	yes	0.611517	no	0.0758878
chr4	46975238	46975738	mm10_chr4.46975238.46975738	2.10702	0.000863323	1.35637	2.21349	1.28548	1.32661	1.44678	2.32136	1.94015	1.52674	1.02627	1.82066	1.18047	1.58585	MM10000000008487627	0.972964	NA	NA	yes	yes	yes	yes	yes	yes	yes	yes	no	Gabbr2 (+16385)	GABBR2 (+19316)	0.140306	no	0.730222	no	0.0970279
chr4	47479387	47479887	mm10_chr4.47479387.47479887	2.18139	2e-05	2.01517	2.99396	1.01067	3.25092	3.26885	2.81999	1.79251	2.1515	1.28332	2.50383	0.782402	2.17028	MM10000000008490148	0.999532	NA	NA	yes	yes	yes	yes	yes	yes	yes	yes	no	Sec61b (+4979)	SEC61B (+5193)	0.041944	no	0.410877	no	-0.0275763
chr4	47497557	47498057	mm10_chr4.47497557.47498057	3.04583	1.44e-13	2.67018	2.40617	1.91906	0.839005	1.02511	1.25071	3.10165	2.91995	1.9481	2.19319	1.51116	1.98039	MM10000000008490239	0.999789	NA	NA	no	yes	yes	yes	yes	yes	yes	yes	no	Sec61b (+23149)	SEC61B (+35610)	0.104695	no	0.740108	no	0.260188
chr4	52423411	52423911	mm10_chr4.52423411.52423911	2.20662	9.79e-11	1.16128	2.3777	1.27086	1.88012	1.65455	2.50709	1.94916	0.301075	1.00016	1.77138	1.07869	1.5411	MM10000000008514868	0.94272	NA	NA	yes	yes	yes	yes	yes	no	no	yes	no	Smc2 (-15582)	SMC2 (-8779)	0.539262	yes	0.230341	no	0.774064
chr4	52639333	52639833	mm10_chr4.52639333.52639833	3.25521	8.73e-19	1.00004	3.03232	0.146502	2.67264	2.60294	3.07518	1.13621	2.8305	0.889733	2.29446	0.14993	1.80277	MM10000000008515947	0.996399	NA	NA	yes	yes	yes	yes	yes	yes	yes	yes	no	Toporsl (+32377)	OR13F1 (-204034)	0.090248	yes	0.402118	no	1.21473
chr4	53086608	53087108	mm10_chr4.53086608.53087108	2.40875	2.98e-07	1.32153	2.70446	0.466542	1.89469	1.87277	2.56806	1.02242	1.42138	0.999837	2.15278	0.180264	1.50952	MM10000000008518184	0.942369	NA	NA	yes	yes	yes	yes	yes	yes	yes	yes	no	Abca1 (+73037)	NIPSNAP3B (+69782)	0.074592	yes	0.497345	no	-0.873408
chr4	54098123	54098623	mm10_chr4.54098123.54098623	2.05923	0.000548158	2.18446	3.03103	2.23001	2.38341	2.39045	2.49148	3.14255	1.38498	1.59678	2.38053	1.83584	2.27741	MM10000000008523241	0.993665	NA	NA	yes	yes	yes	yes	yes	yes	yes	yes	no	Tmem38b (+272328)	TMEM38B (+362030)	0.549428	yes	0.559476	no	0.759308
chr4	54925408	54925908	mm10_chr4.54925408.54925908	2.11541	0.00199599	0.57563	0.989722	0.183549	0.426774	0.36411	0.740649	2.01433	0.0725718	0.457723	0.99291	0.13025	0.631656	MM10000000008527378	0.378084	NA	NA	yes	yes	yes	yes	yes	no	no	yes	no	Zfp462 (-22318)	ZNF462 (-15824)	0.103666	no	0.0460219	no	-0.178091
chr4	55959955	55960455	mm10_chr4.55959955.55960455	1.95347	2.01e-05	1.45201	1.60266	1.39374	0.841367	0.79892	1.22432	2.07215	0.966057	0.999662	1.20388	1.00354	1.23257	MM10000000008532551	0.703055	NA	0.977727	yes	yes	yes	yes	yes	yes	yes	yes	no	Klf4 (-427739)	KLF4 (-500053)	0.324626	no	0.339416	yes	0.24081
chr4	55973195	55973695	mm10_chr4.55973195.55973695	2.82332	6.59e-05	1.61154	2.51775	2.37051	0.951346	1.22935	2.05562	3.38588	2.12247	0.999989	1.79639	1.64937	1.88093	MM10000000008532617	0.995969	0.994665	0.976583	yes	yes	yes	yes	yes	yes	yes	yes	no	Klf4 (-440979)	KLF4 (-513615)	-0.04615	no	-0.188363	yes	2.07085
chr4	56136534	56137034	mm10_chr4.56136534.56137034	2.03517	1.16e-05	1.91394	2.31547	0.456699	2.25969	2.55297	2.71727	0.097251	0.807686	1.23785	1.91816	0.344122	1.51101	MM10000000008533433	0.94493	NA	NA	yes	yes	yes	yes	yes	yes	yes	yes	no	Klf4 (-604318)	KLF4 (-672973)	0.349762	yes	0.532684	no	0.946587
chr4	56263811	56264311	mm10_chr4.56263811.56264311	1.57198	0.00126833	0.583437	0.406237	1.69079	0.463269	0.344005	0.142756	1.14204	0.915286	0.502602	0.435355	1.27241	0.718017	MM10000000008534070	0.715604	NA	0.977802	yes	yes	yes	no	yes	yes	no	yes	no	Actl7b (+477382)	ACTL7B (+536389)	0.271604	yes	0.712605	no	0.612972
chr4	56264583	56265083	mm10_chr4.56264583.56265083	1.57198	0.00126833	1.32477	2.14152	1.71822	1.60518	2.1295	2.01477	2.30847	3.23804	1.00028	1.47254	1.15449	1.82798	MM10000000008534074	0.779045	NA	NA	yes	yes	yes	yes	no	no	no	yes	no	Actl7b (+476610)	ACTL7B (+535987)	0.301392	no	0.439364	no	0.112521
chr4	56739583	56740083	mm10_chr4.56739583.56740083	2.03137	3.21e-07	2.47949	1.75472	1.27612	1.32886	1.43208	1.32965	2.84439	0.449309	1.78779	1.06608	1.18438	1.53935	MM10000000008536449	0.997399	NA	NA	yes	yes	yes	yes	yes	no	no	yes	no	Actl7b (+1610)	ACTL7B (+4053)	0.097124	yes	1.05059	no	0.0198873
chr4	56740026	56740526	mm10_chr4.56740026.56740526	2.03137	3.21e-07	2.1762	2.12741	1.09495	1.22373	1.48608	2.06438	0.982917	1.25714	1.74901	1.69261	0.534816	1.48993	MM10000000008536451	0.994855	0.99965	NA	no	no	no	no	no	no	no	yes	no	Actl7b (+1167)	ACTL7B (+2108)	0.739418	yes	1.39251	no	0.327713
chr4	56915638	56916138	mm10_chr4.56915638.56916138	1.89286	0.000107192	2.00117	4.29055	1.98135	3.62217	4.20205	4.75288	3.39594	0.465089	1.42405	3.28843	1.46859	2.80839	MM10000000008537329	0.999637	NA	0.977753	yes	yes	yes	yes	yes	no	no	yes	no	Tmem245 (+31523)	TMEM245 (+39794)	0.034108	no	0.239942	yes	0.0423349
chr4	56915900	56916400	mm10_chr4.56915900.56916400	1.89286	0.000107192	1.31709	1.66326	1.52307	0.402244	0.715245	0.793988	2.29002	1.49327	1.08888	1.26596	1.42115	1.27038	MM10000000008537330	0.96448	0.998104	0.977051	no	yes	yes	yes	yes	no	no	no	NA	Tmem245 (+31261)	NA	-0.111952	no	0.179774	yes	0.443316
chr4	57574769	57575269	mm10_chr4.57574769.57575269	2.1435	6.93e-09	2.37579	2.01471	1.83579	1.57441	1.72722	1.93952	1.75292	2.42198	1.6115	1.81911	1.33539	1.8553	MM10000000008540625	0.987117	NA	NA	yes	yes	yes	yes	yes	yes	yes	yes	no	Palm2 (+140772)	PALM2 (+6799)	0.0985	no	0.491963	no	0.401939
chr4	57575315	57575815	mm10_chr4.57575315.57575815	2.1435	6.93e-09	1.6205	1.02788	0.466053	0.548433	0.967905	1.08399	1.23306	0.119368	1.28048	1.02604	0.628301	0.909274	MM10000000008540627	0.918644	NA	NA	no	yes	no	no	no	no	no	yes	no	Palm2 (+141318)	PALM2 (+7262)	0.15667	no	0.926557	no	-0.253318
chr4	57611206	57611706	mm10_chr4.57611206.57611706	1.96439	0.00247555	1.69057	3.63821	0.572877	2.07147	2.34145	2.8238	0.213229	1.54979	1.19444	2.72525	0.159169	1.72548	MM10000000008540807	0.980637	NA	NA	yes	yes	yes	yes	yes	yes	yes	yes	no	Palm2 (+177209)	PALM2 (+41340)	0.200038	no	0.637515	no	-0.684512
chr4	57720695	57721195	mm10_chr4.57720695.57721195	1.95441	0.000713566	0.976268	0.592811	1.03999	1.11341	1.15559	1.53441	1.0225	0.575258	1.00023	0.606744	0.901584	0.956254	MM10000000008541354	0.933435	NA	NA	yes	yes	no	yes	no	no	no	yes	no	Akap2 (-133214)	PALM2 (+176631)	0.24649	no	0.595447	no	0.0231307
chr4	57737079	57737579	mm10_chr4.57737079.57737579	2.337	6.94e-09	1.91644	2.69106	0.207065	1.3815	1.88545	2.28726	0.229377	0.836429	1.5443	2.30978	0.102422	1.39919	MM10000000008541436	0.972171	0.999926	NA	yes	yes	yes	yes	yes	no	no	yes	no	Akap2 (-116830)	PALM2 (+200317)	-0.046672	yes	0.976718	yes	0.698265
chr4	57837113	57837613	mm10_chr4.57837113.57837613	3.05917	1.38e-13	1.94927	2.26135	1.44208	2.24446	2.06375	2.09298	2.59611	1.05381	1.63667	1.71948	1.05861	1.82896	MM10000000008541936	0.999213	NA	NA	yes	yes	yes	yes	yes	yes	yes	yes	no	Akap2 (-16796)	TXN (+142419)	0.094988	yes	1.29393	yes	0.134307
chr4	58240351	58240851	mm10_chr4.58240351.58240851	3.19823	1.25e-09	1.45905	2.7529	1.05513	2.039	2.56152	2.33606	2.49013	1.70086	1.07123	2.21793	0.829104	1.86481	MM10000000008543953	0.808855	NA	NA	yes	yes	yes	yes	yes	no	no	yes	no	Svep1 (-34005)	SVEP1 (-36013)	0.02665	no	0.196721	no	1.40703
chr4	58875174	58875674	mm10_chr4.58875174.58875674	2.18601	5.31e-09	1.08974	1.29418	1.46492	0.68702	0.763366	0.886364	2.55152	1.33523	1.00037	0.98361	1.28412	1.21277	MM10000000008547127	0.974989	NA	0.97753	yes	yes	yes	yes	yes	yes	yes	yes	no	AI314180 (+37325)	KIAA0368 (+44357)	0.580442	no	0.097324	no	0.858743
chr4	62805734	62806234	mm10_chr4.62805734.62806234	1.85242	2.16e-06	2.22398	2.34328	2.0278	2.69341	3.1574	2.96057	2.062	1.39789	1.93391	1.93888	1.31536	2.18677	MM10000000008566779	0.997909	NA	0.978022	yes	yes	yes	yes	yes	yes	yes	yes	no	Zfp618 (-159590)	ZNF618 (-157999)	-0.068796	yes	1.30248	yes	-0.434294
chr4	63275291	63275791	mm10_chr4.63275291.63275791	1.62479	0.00724115	1.5122	0.971834	1.16502	1.03568	0.989392	0.795101	1.91032	0.876318	1.23391	0.922232	1.07396	1.13509	MM10000000008569127	0.881152	NA	0.976725	yes	yes	yes	yes	yes	yes	yes	yes	no	Col27a1 (+60106)	COL27A1 (+79442)	-0.211248	yes	0.65235	yes	0.585138
chr4	66212063	66212563	mm10_chr4.66212063.66212563	2.28424	1.85e-08	1.05188	1.25983	1.10579	1.83912	1.83221	1.05459	0.893679	2.7932	0.89954	1.09751	0.84617	1.33396	MM10000000008583811	0.903209	NA	0.977808	yes	yes	yes	no	yes	yes	no	yes	no	Astn2 (+192298)	ASTN2 (+172819)	0.67345	no	0.81302	no	0.825834
chr4	66335474	66335974	mm10_chr4.66335474.66335974	2.91227	3.71e-08	0.999632	0.731928	1.6945	0.664165	0.486294	0.311889	1.41988	0.820701	0.84299	0.688711	1.45746	0.919832	MM10000000008584428	0.631857	NA	0.978047	yes	yes	yes	yes	yes	yes	yes	yes	no	Astn2 (+68887)	ASTN2 (+60278)	0.097236	no	0.370491	no	1.6117
chr4	66336396	66336896	mm10_chr4.66336396.66336896	1.79812	0.00075732	1.11747	3.97362	0.397396	3.00459	2.88675	3.76767	0.764836	1.7709	0.999526	2.85334	0.10473	1.96735	MM10000000008584433	0.949763	NA	0.975197	yes	yes	yes	no	yes	no	no	yes	yes	Astn2 (+67965)	ASTN2 (+59343)	0.290896	yes	0.550559	yes	-0.0239732
chr4	66807670	66808170	mm10_chr4.66807670.66808170	1.79459	0.00335518	0.513597	1.22122	0.862897	0.504576	0.123522	0.707314	0.777253	0.305813	0.295761	0.781628	0.566096	0.605425	MM10000000008586789	0.91074	NA	0.976427	yes	yes	yes	no	yes	no	no	yes	no	Tlr4 (-19664)	TLR4 (-28891)	0.065754	no	0.0376087	no	1.30462
chr4	152788360	152788860	mm10_chr4.152788360.152788860	1.93593	0.000431006	1.29688	2.31128	0.413943	2.00308	2.20602	2.17583	0.854722	2.81852	1.11199	1.96197	0.264033	1.58348	MM10000000009016693	0.996987	NA	NA	yes	yes	yes	yes	yes	yes	yes	yes	yes	Nphp4 (+310468)	NPHP4 (+505944)	0.3771	yes	0.375381	yes	0.442208
chr2	142594641	142595141	mm10_chr2.142594641.142595141	1.81933	0.00478377	1.58835	1.41317	2.25474	0.715595	1.1154	0.763011	3.39783	2.19266	1.12817	1.205	1.56309	1.57609	MM10000000010548452	0.897472	NA	NA	yes	yes	yes	yes	yes	yes	yes	yes	yes	Kif16b (+306640)	KIF16B (+331615)	0.097828	no	0.605465	yes	1.99018
chr4	68546714	68547214	mm10_chr4.68546714.68547214	2.14525	3.19e-09	0.85309	0.979624	1.53813	0.874124	0.571563	0.62071	1.38604	0.35103	0.716148	0.847957	1.06877	0.891562	MM10000000008595484	NA	NA	NA	no	yes	yes	yes	yes	yes	yes	yes	no	Brinp1 (+407433)	BRINP1 (+365291)	0.150512	yes	0.305707	no	3.00874
chr4	68547016	68547516	mm10_chr4.68547016.68547516	2.14525	3.19e-09	1.40001	1.29725	1.15583	1.19433	1.71924	1.79514	2.23856	1.24184	1.07738	1.14524	1.07212	1.39427	MM10000000008595486	0.882115	0.993157	0.978422	yes	yes	yes	yes	yes	yes	yes	yes	no	Brinp1 (+407131)	BRINP1 (+364992)	0.089502	yes	0.224857	no	0.622088
chr4	73950323	73950823	mm10_chr4.73950323.73950823	1.83747	0.00545249	1.32308	2.15676	0.933814	0.930922	1.39267	1.29664	1.71998	1.57648	0.999974	1.66247	0.806878	1.34542	MM10000000008622502	NA	NA	NA	no	no	no	no	no	no	no	yes	no	2310002L09Rik (+272)	RASEF (-203867)	0.27091	no	0.197145	no	0.934665
chr4	76780262	76780762	mm10_chr4.76780262.76780762	2.1795	3.47e-07	0.849849	0.981348	2.16958	0.330225	0.101344	0.098636	1.84375	1.33317	0.399731	0.788892	1.84807	0.976781	MM10000000008636652	0.41116	NA	NA	no	no	no	no	no	no	no	yes	no	Ptprd (-186213)	PTPRD (+839738)	0.023884	yes	-0.00630034	yes	1.1574
chr4	81447433	81447933	mm10_chr4.81447433.81447933	2.36198	2.16e-06	1.00013	1.49556	1.70723	0.449639	0.521271	0.999154	2.07996	0.160318	0.745838	1.25838	1.17041	1.05344	MM10000000008659988	0.851635	NA	NA	yes	yes	yes	yes	no	yes	no	no	NA	Mpdz (-4876)	NA	0.104216	no	-0.178303	no	0.526707
chr4	82695675	82696175	mm10_chr4.82695675.82696175	1.96929	7.45e-08	1.38464	1.45183	0.757283	0.313776	0.630689	1.00194	0.931149	0.0305614	1.16416	1.23122	0.600515	0.863433	MM10000000008666229	0.902435	NA	NA	yes	yes	yes	no	yes	no	no	yes	no	Zdhhc21 (+163748)	ZDHHC21 (+170595)	-0.033156	yes	0.823141	yes	-0.605308
chr4	82696037	82696537	mm10_chr4.82696037.82696537	1.96929	7.45e-08	1.57269	0.435924	1.90323	0.609846	0.798631	0.553992	2.19857	1.96284	1.15132	0.608347	1.52152	1.21063	MM10000000008666231	0.94889	NA	0.978061	yes	yes	yes	no	yes	no	no	yes	no	Zdhhc21 (+163386)	ZDHHC21 (+170249)	-0.104918	yes	0.989874	yes	0.291579
chr4	82799727	82800227	mm10_chr4.82799727.82800227	2.58986	6.78e-06	1.00012	1.32388	0.905801	1.09033	1.07862	1.36657	1.00734	0.692611	0.999742	1.09689	0.699073	1.02373	MM10000000008666749	0.444672	0.0309548	NA	yes	yes	yes	yes	yes	no	no	yes	no	Zdhhc21 (+59696)	ZDHHC21 (+80957)	0.090426	no	0.441019	yes	1.15105
chr4	83195722	83196222	mm10_chr4.83195722.83196222	3.19367	3.29e-25	2.44048	3.97828	0.696575	2.3643	2.13033	3.06058	0.876313	0.537535	1.71283	3.12595	0.436335	1.94177	MM10000000008668729	0.999927	NA	NA	yes	yes	yes	yes	yes	yes	yes	yes	no	Ttc39b (+128283)	DCDC2C (-16325)	0.113594	yes	0.33482	yes	1.3652
chr4	83204829	83205329	mm10_chr4.83204829.83205329	2.32758	4.32e-07	0.726149	0.838696	2.15144	0.650981	0.142639	0.698002	2.12387	1.8379	0.314282	0.677981	1.76831	1.08457	MM10000000008668775	0.52519	NA	0.978012	yes	yes	yes	yes	yes	yes	yes	yes	no	Ttc39b (+119176)	FREM1 (-233533)	0.076808	no	-0.355334	no	2.45286
chr4	83299042	83299542	mm10_chr4.83299042.83299542	3.31363	2.51e-10	1.466	2.81826	1.54075	0.651926	0.891935	1.29076	2.61004	3.02651	1.0003	2.10453	1.16415	1.68774	MM10000000008669246	0.994726	NA	0.977455	yes	yes	yes	yes	yes	yes	yes	no	NA	Ttc39b (+24963)	NA	0.0828145	no	0.347321	no	1.31782
chr4	83299187	83299687	mm10_chr4.83299187.83299687	3.31363	2.51e-10	0.842273	1.66999	1.45051	0.381503	0.483591	0.752799	1.68493	2.69573	0.58825	1.2699	1.29059	1.19182	MM10000000008669247	0.996766	NA	NA	yes	yes	yes	yes	yes	yes	yes	no	NA	Ttc39b (+24818)	NA	0.127872	no	0.310642	no	2.79617
chr4	84150676	84151176	mm10_chr4.84150676.84151176	1.60358	0.000858763	1.86347	1.41904	0.931042	1.46066	1.74851	1.44126	1.35901	0.861357	1.59745	1.02018	0.602227	1.30038	MM10000000008673504	0.980965	NA	NA	yes	yes	yes	yes	yes	yes	yes	yes	no	Bnc2 (+524160)	BNC2 (+593561)	0.284406	yes	1.30817	no	-0.188663
chr4	84151108	84151608	mm10_chr4.84151108.84151608	2.19202	1.51e-14	1.13586	2.57946	0.664826	2.02016	2.12144	1.97501	1.70569	0.51233	0.999798	1.98102	0.517199	1.47389	MM10000000008673506	0.983334	NA	NA	yes	yes	yes	yes	yes	no	no	yes	no	Bnc2 (+523728)	BNC2 (+593074)	0.30319	yes	0.941087	no	0.240331
chr16	90468511	90469011	mm10_chr16.90468511.90469011	1.86086	5.39e-06	1.36507	2.04352	2.46617	0.507045	1.07381	0.881824	2.31216	1.85616	1.12622	1.76538	1.71616	1.55577	MM10000000004055928	0.983588	NA	NA	yes	yes	yes	yes	yes	yes	yes	yes	yes	Hunk (+82364)	HUNK (+91317)	0.081558	yes	0.719756	yes	0.219197
chr4	84187604	84188104	mm10_chr4.84187604.84188104	1.8125	1.2e-06	0.552875	0.79706	0.622188	0.707196	0.703592	0.801863	0.773121	1.84651	0.58284	0.706759	0.343603	0.767055	MM10000000008673689	0.882908	NA	0.976448	yes	yes	yes	yes	yes	yes	yes	yes	no	Bnc2 (+487232)	BNC2 (+553521)	-0.094372	yes	0.220436	no	-0.658814
chr4	84187834	84188334	mm10_chr4.84187834.84188334	1.8125	1.2e-06	1.39924	1.82947	0.400835	0.623306	1.06152	1.39955	0.0273738	2.03851	1.17672	1.46439	0.157077	1.05254	MM10000000008673690	0.607954	NA	0.975393	yes	yes	yes	yes	yes	yes	yes	yes	no	Bnc2 (+487002)	BNC2 (+553285)	-0.099398	yes	0.460611	no	-1.40259
chr4	84203612	84204112	mm10_chr4.84203612.84204112	3.03175	1.92e-32	3.21041	3.436	1.14404	3.12356	3.51722	3.49209	3.28194	2.67517	2.55278	2.6948	1.05799	2.74418	MM10000000008673769	0.99995	NA	NA	yes	yes	yes	yes	yes	yes	yes	yes	no	Bnc2 (+471224)	BNC2 (+534679)	0.360682	yes	0.768274	no	0.30063
chr4	87789767	87790267	mm10_chr4.87789767.87790267	2.12488	2.93e-07	0.804052	0.51849	1.92842	0.25197	0.253875	0.505828	2.30866	1.09632	0.588613	0.52481	1.5244	0.936858	MM10000000008691700	0.863009	NA	0.977688	yes	yes	yes	no	yes	no	no	yes	no	Mllt3 (+243347)	MLLT3 (+260752)	0.504128	no	-0.158899	yes	1.23275
chr4	89210172	89210672	mm10_chr4.89210172.89210672	1.82309	0.00041611	1.93426	3.55173	1.9285	2.7312	3.21831	3.39832	2.39321	1.81957	1.5679	2.80256	1.39951	2.43137	MM10000000008698802	0.703587	NA	0.977232	yes	yes	yes	yes	yes	yes	yes	no	NA	Mtap (+73300)	NA	0.042324	no	0.923898	yes	1.10999
chr4	89779121	89779621	mm10_chr4.89779121.89779621	1.95769	0.000934687	1.08797	1.52248	1.23597	1.75809	2.04135	2.71955	2.44361	0.494062	0.999746	1.31056	1.02137	1.51225	MM10000000008701646	0.941263	NA	NA	yes	yes	yes	yes	yes	no	no	yes	no	Dmrta1 (+91173)	DMRTA1 (+39405)	0.172318	yes	0.238875	no	0.473733
chr4	89834692	89835192	mm10_chr4.89834692.89835192	1.50605	0.00327765	1.26145	2.27939	1.32401	2.2484	2.26152	2.11777	1.85391	1.10479	1.06337	1.93588	1.14244	1.69027	MM10000000008701924	0.680341	NA	0.976665	yes	yes	yes	no	yes	no	no	yes	no	Dmrta1 (+146744)	DMRTA1 (+75806)	0.470396	yes	0.448733	yes	1.04956
chr4	90631233	90631733	mm10_chr4.90631233.90631733	2.63184	7.81e-13	0.166071	0.29287	1.16361	0.501223	0.575229	0.894641	1.06057	1.32473	0.135047	0.167019	0.891632	0.652058	MM10000000008705907	0.886381	NA	0.978008	yes	yes	yes	yes	yes	yes	yes	no	NA	Zfp352 (+412663)	NA	0.00875461	no	0.337413	yes	-0.397043
chr4	91147635	91148135	mm10_chr4.91147635.91148135	1.96466	0.000459733	1.2717	1.41577	3.47293	0.6282	1.07145	1.03916	3.2148	2.20733	0.971815	1.0065	2.57369	1.71576	MM10000000008708489	0.906675	NA	0.978652	yes	yes	yes	yes	yes	yes	yes	yes	no	Elavl2 (+228578)	ELAVL2 (+228863)	0.301816	no	-0.414929	yes	1.28555
chr4	94385608	94386108	mm10_chr4.94385608.94386108	1.74264	0.00100562	1.91213	2.94504	0.540974	0.635042	0.852526	1.48812	1.70064	2.28279	1.49644	2.24657	0.444883	1.50411	MM10000000008724679	NA	NA	0.977587	yes	yes	yes	yes	yes	no	no	yes	no	Gm10306 (-170688)	CAAP1 (+205137)	0.161822	no	0.726246	no	0.250267
chr4	99163494	99163994	mm10_chr4.99163494.99163994	2.17618	0.000420071	2.15238	2.14411	0.975283	1.92423	1.77291	2.40276	1.77395	1.52693	1.64566	2.01969	1.02558	1.76032	MM10000000008748568	0.98924	0.999181	0.976215	yes	yes	yes	yes	yes	yes	yes	no	NA	Atg4c (-30190)	NA	0.003114	no	0.651844	yes	1.11951
chr4	100055997	100056497	mm10_chr4.100055997.100056497	1.73189	0.00137657	2.61753	2.16866	1.49497	2.34481	3.16331	2.27377	2.83459	1.27755	1.94023	1.80939	1.07887	2.09124	MM10000000008753031	0.980929	NA	0.977042	yes	yes	yes	yes	yes	yes	yes	yes	no	Ror1 (-39544)	ROR1 (-43065)	-0.001814	yes	1.09248	no	-0.011251
chr4	100056576	100057076	mm10_chr4.100056576.100057076	1.73189	0.00137657	1.45675	3.0374	1.12829	0.733956	0.642872	1.45918	2.82745	1.00031	1	2.15978	0.858345	1.48221	MM10000000008753034	NA	NA	NA	no	no	no	no	no	no	no	yes	no	Ror1 (-38965)	ROR1 (-42069)	0.290244	yes	0.409105	no	-0.345615
chr4	100169321	100169821	mm10_chr4.100169321.100169821	1.81687	1.24e-05	0.907061	1.05617	0.217475	1.38665	1.57515	1.77354	0.892233	1.25843	0.72911	0.955622	0.161311	0.992068	MM10000000008753597	0.996564	0.999866	NA	yes	yes	yes	yes	yes	no	no	yes	no	Ror1 (+73780)	ROR1 (+91572)	-0.042398	yes	0.324887	no	1.19538
chr4	101616199	101616699	mm10_chr4.101616199.101616699	1.91438	0.00973075	0.643602	2.17452	0.939002	1.00471	1.58966	1.7855	0.828101	1.05948	0.672483	1.50812	0.866753	1.18836	MM10000000008760832	0.924721	NA	0.97525	yes	yes	yes	yes	yes	yes	yes	yes	no	Leprot (-31269)	LEPR (-31433)	0.316666	no	0.078466	no	-0.00580916
chr4	101772214	101772714	mm10_chr4.101772214.101772714	2.51508	4.09e-05	0.706316	1.73051	0.236587	0.929709	0.722814	1.34276	0.566121	1.17279	0.601125	1.24883	0.206543	0.860373	MM10000000008761612	0.978134	NA	NA	yes	yes	yes	yes	yes	yes	yes	yes	no	Lepr (+55060)	PDE4B (-183002)	0.011994	no	0.152244	no	-0.2397
chr4	102861238	102861738	mm10_chr4.102861238.102861738	1.92601	8.07e-10	2.1625	1.36458	1.6724	1.66628	1.98822	1.29726	2.34066	0.782783	1.42463	0.770578	1.26367	1.52123	MM10000000008767057	0.977361	NA	0.97835	yes	yes	yes	yes	yes	yes	yes	yes	yes	Sgip1 (+101125)	SGIP1 (+99437)	0.454742	yes	0.414803	no	0.0625663
chr4	102861594	102862094	mm10_chr4.102861594.102862094	1.8328	8.62e-09	1.28039	1.9003	2.43231	1.10813	1.60894	1.00404	2.24221	0.326767	1.05341	1.64899	1.83314	1.49442	MM10000000008767059	0.933218	NA	NA	yes	yes	yes	yes	yes	yes	yes	yes	yes	Sgip1 (+101481)	SGIP1 (+99802)	0.532432	yes	-0.0698439	no	0.875895
chr4	103580223	103580723	mm10_chr4.103580223.103580723	2.71534	2.18e-08	2.00252	2.24319	1.66522	1.23754	1.70484	1.38859	2.23454	1.47196	1.52413	1.67624	1.27474	1.67486	MM10000000008770652	0.999631	NA	NA	yes	yes	yes	yes	yes	no	no	yes	no	Oma1 (+266661)	OMA1 (+266724)	0.113734	no	0.921406	yes	1.8761
chr4	103580384	103580884	mm10_chr4.103580384.103580884	2.71534	2.18e-08	1.89574	3.075	0.293899	1.85442	2.30276	2.06819	1.16741	0.569463	1.60611	2.37267	0.363437	1.59719	MM10000000008770653	0.999968	1	NA	yes	yes	yes	yes	yes	no	no	yes	no	Oma1 (+266822)	OMA1 (+266899)	0.12559	no	1.16764	yes	0.792834
chr4	103902159	103902659	mm10_chr4.103902159.103902659	3.02513	2.81e-24	3.1503	4.50731	0.383677	3.87672	4.05974	4.55386	1.1279	1.89502	2.53621	3.70421	0.134915	2.7209	MM10000000008772262	0.992403	NA	NA	yes	yes	yes	yes	yes	yes	yes	yes	no	Dab1 (-465181)	DAB1 (-511044)	0.378762	yes	0.950839	yes	0.42725
chr4	104031690	104032190	mm10_chr4.104031690.104032190	1.91285	4.17e-06	1.05958	1.38553	1.08818	0.8875	1.38909	1.36311	1.05998	2.23648	0.793177	0.860367	0.781854	1.17317	MM10000000008772909	0.911179	NA	0.976947	yes	yes	yes	yes	yes	yes	yes	yes	no	Dab1 (-335650)	DAB1 (-375346)	-0.044448	yes	-0.101582	yes	0.757695
chr4	104031936	104032436	mm10_chr4.104031936.104032436	1.91285	4.17e-06	0.984481	1.35086	0.772015	0.914698	1.03629	0.797467	0.995844	3.27287	0.764342	0.871347	0.551419	1.11924	MM10000000008772910	0.968345	NA	NA	yes	yes	yes	yes	yes	yes	yes	yes	no	Dab1 (-335404)	DAB1 (-375069)	0.175304	yes	0.291742	yes	0.626569
chr4	105535643	105536143	mm10_chr4.105535643.105536143	2.2958	6.6e-09	1.88444	1.75068	0.536505	1.22684	1.81487	1.68773	0.471055	1.69998	1.19998	1.4724	0.381163	1.28415	MM10000000008780429	0.993691	NA	NA	yes	yes	yes	no	no	yes	no	yes	no	Gm12728 (-253976)	PLPP3 (+411399)	0.216474	no	0.50517	yes	2.16425
chr4	107742426	107742926	mm10_chr4.107742426.107742926	3.76884	1.05e-14	0.635653	1.10196	1.06182	0.287863	0.342912	0.673132	1.94826	0.458386	0.639779	0.892116	1.01882	0.8237	MM10000000008791463	0.792728	NA	NA	yes	yes	yes	yes	yes	yes	yes	yes	no	Dmrtb1 (-58446)	LRP8 (-58133)	0.2834	no	0.314624	no	0.957896
chr4	108598275	108598775	mm10_chr4.108598275.108598775	3.29876	4.01e-05	0.633742	0.69956	0.701479	0.838504	0.517774	1.50736	1.67404	1.27416	0.498897	0.637364	0.546018	0.866263	MM10000000008795742	0.976562	NA	0.976027	yes	yes	yes	yes	yes	yes	yes	yes	no	Orc1 (+19071)	ORC1 (+14658)	0.030616	no	-0.704858	no	0.465733
chr4	66869589	66870089	mm10_chr4.66869589.66870089	1.8328	8.62e-09	1.02417	2.11884	1.35181	1.08698	1.24997	1.79394	2.11358	1.04876	0.999772	1.64196	1.03686	1.40606	MM10000000008587099	0.956608	NA	NA	yes	yes	yes	yes	yes	yes	yes	yes	yes	Tlr4 (+42255)	TLR4 (+33281)	0.21745	yes	-0.0855119	yes	0.384221
chr4	125413781	125414281	mm10_chr4.125413781.125414281	2.19511	8.26e-07	1.84536	0.950041	1.4421	0.731646	0.933516	0.412995	1.90653	0.924771	1.50937	0.786463	1.28943	1.15747	MM10000000008879820	0.984109	NA	0.978492	yes	yes	yes	yes	yes	no	no	yes	no	Grik3 (-76669)	GRIK3 (-79837)	-0.140552	yes	0.956585	yes	0.192022
chr4	127751931	127752431	mm10_chr4.127751931.127752431	3.70065	0.000102817	1.11311	1.41483	2.40231	1.35882	1.49958	1.73881	2.32602	0.966538	0.796767	0.9539	1.51918	1.46271	MM10000000008891510	0.937647	NA	NA	yes	yes	yes	yes	yes	yes	yes	no	NA	CK137956 (+218770)	NA	0.315678	no	-0.154834	no	1.05546
chr4	128157869	128158369	mm10_chr4.128157869.128158369	2.01942	0.00010395	2.51376	1.81271	1.66254	0.27835	0.654279	0.824834	1.31241	2.37748	1.70751	1.58439	1.24832	1.45242	MM10000000008893540	0.967159	NA	0.977774	yes	yes	no	no	no	yes	no	yes	no	Hmgb4 (+102838)	HMGB4 (+119112)	0.084864	yes	0.669418	no	0.702115
chr4	131356328	131356828	mm10_chr4.131356328.131356828	2.08888	9e-06	2.74565	1.96396	1.3879	1.71528	1.87414	1.21092	2.12468	0.747291	2.1276	1.62249	1.15705	1.69791	MM10000000008909532	0.992137	NA	NA	yes	yes	yes	yes	yes	no	no	no	NA	Matn1 (+412193)	NA	0.150402	yes	1.42273	no	-0.577613
chr4	143038244	143038744	mm10_chr4.143038244.143038744	3.75381	1.07e-10	1.85325	1.33696	2.04856	2.04054	2.32605	1.43962	1.24881	2.55813	1.26298	1.32778	1.66003	1.73661	MM10000000008967942	0.998898	NA	NA	yes	yes	yes	yes	yes	yes	yes	yes	no	Prdm2 (+174211)	PRDM2 (+241500)	-0.01515	no	0.563771	no	0.842453
chr4	143038362	143038862	mm10_chr4.143038362.143038862	3.75381	1.07e-10	1.88855	2.65365	1.51941	2.42157	2.64237	2.26228	1.02252	1.94148	1.36446	2.34715	1.14433	1.92798	MM10000000008967943	0.99857	NA	NA	yes	yes	yes	yes	yes	yes	yes	yes	no	Prdm2 (+174093)	PRDM2 (+241367)	0.039972	no	0.843475	no	0.845969
chr4	143038508	143039008	mm10_chr4.143038508.143039008	3.75381	1.07e-10	1.79513	2.65561	0.511181	1.49291	1.68175	1.55978	1.82552	1.86551	1.40215	2.18289	0.502494	1.58863	MM10000000008967943	0.99857	NA	NA	yes	yes	yes	yes	yes	yes	yes	yes	no	Prdm2 (+173947)	PRDM2 (+241226)	0.090342	no	0.856244	no	-0.438437
chr4	143335011	143335511	mm10_chr4.143335011.143335511	3.07693	2.45e-05	1.40712	2.22921	0.830005	1.36983	0.999637	1.21983	1.40354	0.633918	1.01405	1.6981	0.525489	1.21188	MM10000000008969426	0.99699	NA	NA	yes	yes	yes	yes	yes	no	no	yes	no	Lrrc38 (-14496)	LRRC38 (-22742)	0.09692	no	0.703699	yes	-0.27199
chr4	147962769	147963269	mm10_chr4.147962769.147963269	3.26472	3.88e-09	1.59721	2.14093	1.17739	1.65868	1.8985	1.72089	1.31734	1.82029	1.25	1.58292	0.976765	1.55827	MM10000000008992565	0.992895	NA	NA	yes	yes	yes	yes	yes	no	no	yes	no	2510039O18Rik (+22124)	NPPB (-29373)	-0.124972	no	0.82834	no	-0.234067
chr4	151271601	151272101	mm10_chr4.151271601.151272101	4.02399	7.1e-06	1.88938	2.17846	1.00602	1.69844	2.10998	1.5646	0.861523	1.43654	1.40606	1.9036	0.890275	1.54044	MM10000000009009109	0.99954	NA	NA	yes	yes	yes	yes	yes	yes	yes	yes	no	Gm13090 (+182281)	VAMP3 (-281078)	-0.299116	no	0.706829	yes	0.508001
chr4	151471997	151472497	mm10_chr4.151471997.151472497	2.357	5.12e-06	1.4094	1.27864	1.51249	1.11622	2.01744	1.20753	1.28355	2.62803	1.18853	1.05698	1.19197	1.44462	MM10000000009010111	0.988057	NA	0.976867	yes	yes	yes	yes	yes	yes	yes	yes	no	Gm13090 (+382677)	CAMTA1 (+439288)	0.001566	no	1.15587	no	0.630251
[truncated: 455 more rows]
